# Supplementary material for: Asymmetric acyl-Mannich reaction of isoquinolines with α-(diazomethyl)phosphonate and diazoacetate catalyzed by chiral Brønsted acids
Source: Royal Society of Chemistry journal article supplement (doi:10.1039/d0cc03201h), 2020-01-01
Supplement: d0cc03201h1.pdf [file d0cc03201h1.pdf]

# Asymmetric Acyl-Mannich Reaction of Isoquinolines with $\alpha$ -(Diazomethyl)phosphonate and Diazoacetate Catalyzed by Chiral Brønsted Acids

Wei Wu,<sup>a</sup> Yan Wang,<sup>a</sup> Jing Guo,<sup>a</sup> Liu Cai,<sup>a</sup> Yuan Chen,<sup>a</sup> Yanmin Huang<sup>\*b</sup> and Yungui Peng<sup>\*a</sup>

<sup>a</sup> Key Laboratory of Applied Chemistry of Chongqing Municipality, School of Chemistry and Chemical Engineering, Southwest University, Chongqing 400715, China

<sup>b</sup> College of Chemistry and Life Science, Guangxi Teachers Education University, Nanning 530001, China

\*E-mail: [huangyanmin828@gxtc.edu.cn](mailto:huangyanmin828@gxtc.edu.cn) (Y. Huang)

\*E-mail: [pengyungui@hotmail.com](mailto:pengyungui@hotmail.com), [pyg@swu.edu.cn](mailto:pyg@swu.edu.cn) (Y. Peng)

## Table of Contents

|                                                                                                                                                     |    |
|-----------------------------------------------------------------------------------------------------------------------------------------------------|----|
| 1. General methods .....                                                                                                                            | 2  |
| 2. Synthesis of chiral phosphoric acids.....                                                                                                        | 2  |
| 3. Screening the chiral phosphoric acids in the reaction of diazomethylphosphonate with isoquinolines and optimization the reaction conditions..... | 3  |
| 4. Optimization of the diazocarbonate with isoquinolines reaction conditions.....                                                                   | 6  |
| 5. General procedure for asymmetric acyl-Mannich reaction .....                                                                                     | 8  |
| 6. Characterization of the acyl-Mannich reaction products .....                                                                                     | 8  |
| 7. Gram-scale reaction to obtain product <b>4d</b> .....                                                                                            | 15 |
| 8. Synthesis of <b>7a</b> , <b>8a</b> and <b>9c</b> from <b>4a</b> and <b>7c</b> .....                                                              | 15 |
| 9. References.....                                                                                                                                  | 18 |
| 10. NMR spectra and HPLC for SPAs and asymmetric acyl-Mannich reaction products. ....                                                               | 19 |

## 1. General methods

All solvents were purified by standard procedures and distilled prior to use. Reagents obtained from commercial source were used without further purification. Petroleum ether and ethyl acetate for flash column chromatography were distilled before use. All reactions were monitored by TLC with silica gel coated plates. Flash column chromatography was performed on silica gel H (10–40  $\mu$ ). NMR spectra were recorded on 600 MHz instruments. Chemical shifts ( $\delta$ ) are given in ppm relative to TMS, coupling constants ( $J$ ) in Hz.  $^1\text{H}$  NMR chemical shifts are reported in ppm relative to tetramethylsilane (TMS) with the solvent signal as the internal standard ( $\text{CDCl}_3$  at 7.26 ppm).  $^{13}\text{C}$  NMR chemical shifts are reported in ppm from tetramethylsilane (TMS) with the solvent resonance as the internal standard ( $\text{CDCl}_3$  at 77.00 ppm). Melting points were determined on an X-6 digital melting-point apparatus and were uncorrected. Optical rotations were measured on a Perkin Elmer 341 Polarimeter at  $\lambda = 589$  nm. Analytical high performance liquid chromatography (HPLC) was carried out on WATERS 510 instrument (2487 Dual  $\lambda$  Absorbance Detector and 515 HPLC Pump) using chiral column. ESI HRMS was recorded on a Bruker Apex-2.5  $\text{\AA}$  MS were purchased from J&K Chemicals and used as received (500 mesh powder).

## 2. Synthesis of chiral phosphoric acids

**Ia-Ib, IIa-III** were synthesized following the procedure described in the literature.<sup>1</sup>

Partial intermediates for the synthesis of chiral phosphoric acids were prepared as the following procedure:

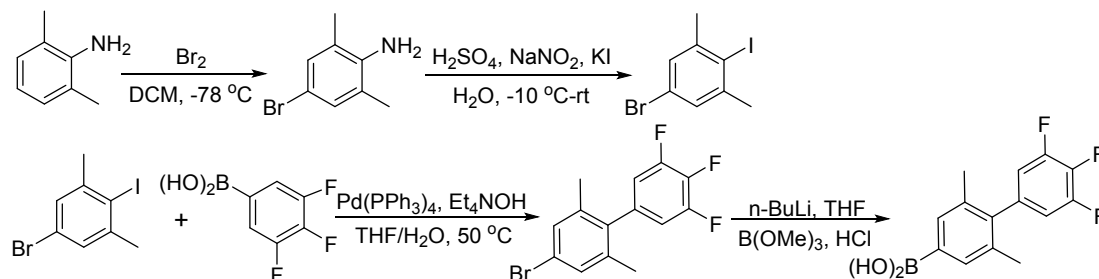

Bromine (5.38 mL, 105 mmol, 1.05 equiv.) was added slowly to the solution of 2,6-dimethylaniline (12.3 mL, 100 mmol, 1.00 equiv.) in dried  $\text{CH}_2\text{Cl}_2$  (250 mL) at  $-78\text{ }^\circ\text{C}$  under argon atmosphere. After addition, the solution was allowed to warm up to room temperature. A saturated aqueous solution of  $\text{Na}_2\text{SO}_3$  was added to the mixture to quench excess bromine in the reaction mixture. Saturated solution of  $\text{Na}_2\text{CO}_3$  was added until the pH = 9, the organic layer was separated and the aqueous layer was extracted two times with  $\text{CH}_2\text{Cl}_2$  (3 x 100 mL). Combined organic layers and dried over sodium sulfate, concentrated under reduce pressure. The residue was purified by column chromatography (PE/EA = 20/1) to obtain pure 4-bromo-2,6-diethylaniline (17.9 g, 90 % yield) as a light brown solid.

4-Bromo-2,6-diethylaniline (4.0 g, 20.0 mmol, 1.0 eq.) was suspended in 10 mL 10% aqueous  $\text{H}_2\text{SO}_4$  and cooled to  $-10\text{ }^\circ\text{C}$ .  $\text{NaNO}_2$  (1.7 g, 25 mmol, 1.25 equiv.) in 10 mL  $\text{H}_2\text{O}$  was added dropwise, giving a pink precipitate, followed by formation of a clear red solution. After the addition, the solution was stirred for further 60 min at  $-10\text{ }^\circ\text{C}$ , followed by dropwise addition of a solution of  $\text{KI}$  (4.5 g, 30 mmol, 1.5 equiv.) in 50 mL  $\text{H}_2\text{O}$ . Warmed to room temperature and stirred overnight. The solution was extracted with PE (4 x 50 mL). The collected organic phases were stirred over saturated aqueous  $\text{Na}_2\text{SO}_3$  solution, until the organic phase had a light yellow color. The organic phase was then dried over  $\text{MgSO}_4$  and the solvent removed under reduced pressure. The residue was purified by column chromatography (PE/EA = 100/1) to obtain pure 5-bromo-2-iodo-1,3-dimethylbenzene (2.1 g, 34 % yield).

To a round-bottomed flask,  $\text{Pd}(\text{PPh}_3)_4$  (0.388 g, 0.336 mmol) was added to the mixture of (3,4,5-trifluorophenyl)boronic acid (1.182 g, 6.72 mmol), 5-bromo-2-iodo-1,3-dimethylbenzene (2.1 g, 6.72 mmol) and  $\text{Et}_4\text{NOH}$  7.7 mL (13.4 mmol, 25% of  $\text{H}_2\text{O}$ ) in 30 mL degassing  $\text{THF}/\text{H}_2\text{O}$  = 3:1 (v:v) under an Ar atmosphere. Stirred at  $50\text{ }^\circ\text{C}$  until the starting material was disappear, then the mixture was concentrated under reduce pressure and the residue was extracted with EA, combined organic layer and washed with saturated NaCl, dried over with  $\text{Na}_2\text{SO}_4$  and concentrated under reduce pressure, the residue was purified by flash chromatography (PE) on silica gel to give 4-bromo-3',4',5'-trifluoro-2,6-dimethyl-1,1'-biphenyl.

$n$ -Butyllithium 1.0 mL (2.4 mmol) was slowly added to the solution of 4-bromo-3',4',5'-trifluoro-2,6-dimethyl-1,1'-biphenyl 0.7 g (2.2 mmol) in dry THF (20 mL) with stirring at  $-78\text{ }^\circ\text{C}$ . The reaction was maintained at  $-78\text{ }^\circ\text{C}$  until starting material was disappear, then trimethylborate 0.37 mL (3.3 mmol) was added slowly, the mixture was warmed up to rt slowly and stirred overnight. 1 N HCl was added to until pH = 1 and stirred for another 2 h. The mixture was extracted with EA, combined organic layer and washed with saturated NaCl, dried over with  $\text{Na}_2\text{SO}_4$  and

concentrated under reduce pressure, the residue was purified by flash chromatography (PE/EA = 3/1) on silica gel to afford (3',4',5'-trifluoro-2,6-dimethyl-[1,1'-biphenyl]-4-yl)boronic acid (0.275g, 45% yield).

**(R)-6, 6'-Bis((4-(tert-butyl)-2-methylphenyl)-1, 1'-spirobiindane-7, 7'-diyl phosphate (Ic)**

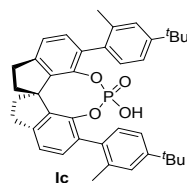

White solid, mp 119.8–121.4 °C,  $[\alpha]_{25}^D = +324.9^\circ$  ( $c = 0.16$ ,  $\text{CHCl}_3$ );  $^1\text{H}$  NMR (600 MHz,  $\text{CDCl}_3$ )  $\delta$  7.10 (t,  $J = 11.5$  Hz, 4H), 7.05 (s, 2H), 7.01 (s, 4H), 3.17–3.08 (m, 2H), 2.89 (dd,  $J = 15.9$ , 7.8 Hz, 2H), 2.32 (dd,  $J = 11.7$ , 6.2 Hz, 2H), 2.15 (s, 2H), 2.09 (s, 6H), 1.16 (s, 18H) ppm;  $^{13}\text{C}$  NMR (151 MHz,  $\text{CDCl}_3$ )  $\delta$  149.6, 144.6, 142.6, 139.9, 135.3, 134.8, 134.3, 131.0, 130.8, 127.5, 125.6, 122.2, 59.8, 38.6, 34.1, 31.3, 30.2, 20.3 ppm. HRMS (ESI)  $m/z$ :  $[\text{M}+\text{Na}]^+$  Calcd for  $\text{C}_{39}\text{H}_{43}\text{O}_4\text{PNa}^+$  629.2797; Found 629.2795.

**(R)-6, 6'-Bis(3', 4', 5'-trifluoro-2, 6-dimethyl-[1, 1'-biphenyl]-4-yl)-1, 1'-spirobiindane-7, 7'-diyl phosphate (Ie)**

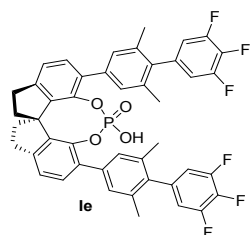

White solid, mp 215.7–217.0 °C,  $[\alpha]_{25}^D = +479.8^\circ$  ( $c = 0.20$ ,  $\text{CHCl}_3$ );  $^1\text{H}$  NMR (600 MHz,  $\text{CDCl}_3$ )  $\delta$  7.30 (d,  $J = 7.5$  Hz, 2H), 7.18 (d,  $J = 7.5$  Hz, 2H), 7.10 (s, 4H), 6.63 (s, 4H), 3.19–3.09 (m, 2H), 2.91 (dd,  $J = 15.8$ , 7.6 Hz, 2H), 2.38 (dd,  $J = 12.0$ , 6.3 Hz, 2H), 2.19 (q,  $J = 10.9$  Hz, 2H), 1.78 (s, 12H) ppm;  $^{13}\text{C}$  NMR (151 MHz,  $\text{CDCl}_3$ )  $\delta$  151.9, 150.2, 145.8, 142.2, 142.1, 140.6, 139.4, 137.8, 137.4, 137.3, 137.1, 135.3, 134.1, 129.9, 128.5, 122.8, 113.3, 113.2, 60.1, 38.5, 30.3, 20.5 ppm. HRMS (ESI)  $m/z$ :  $[\text{M}+\text{Na}]^+$  Calcd for  $\text{C}_{45}\text{H}_{33}\text{F}_6\text{O}_4\text{PNa}^+$  805.1918; Found 805.1913.

### 3. Screening the chiral phosphoric acids in the reaction of diazomethylphosphonate with isoquinolines and optimization the reaction conditions

**Table S1.** Screening the chiral phosphoric acids in the reaction of diazomethylphosphonate with isoquinoline<sup>a</sup>

**1a**      **2a:** R' = *t*Bu  
**2b:** R' = Et      **3a**      **4a':** R' = *t*Bu; **4a:** R' = Et

**Ia:** R = Ph

**Ib:** R = 4-*t*BuC<sub>6</sub>H<sub>4</sub>

**Ic:** R = 2-Me-4-*t*BuC<sub>6</sub>H<sub>3</sub>

**Id:** R = 4-(3, 4, 5-F<sub>3</sub>C<sub>6</sub>H<sub>2</sub>)-C<sub>6</sub>H<sub>4</sub>

**Ie:** R = 3,5-(Me)<sub>2</sub>-4-(3,4,5-F<sub>3</sub>C<sub>6</sub>H<sub>2</sub>)-C<sub>6</sub>H<sub>2</sub>

**If:** R = 4-MeOC<sub>6</sub>H<sub>4</sub>

**Ig:** R = 4-FC<sub>6</sub>H<sub>4</sub>

**Ih:** R = 4-CF<sub>3</sub>C<sub>6</sub>H<sub>4</sub>

**Ii:** R = 3, 5-(CF<sub>3</sub>)<sub>2</sub>C<sub>6</sub>H<sub>3</sub>

**Ij:** R = 3, 4, 5-F<sub>3</sub>C<sub>6</sub>H<sub>4</sub>

**Ik:** R = 4-(4-CF<sub>3</sub>C<sub>6</sub>H<sub>4</sub>)-C<sub>6</sub>H<sub>4</sub>

**Il:** R = 4-(3, 5-(CF<sub>3</sub>)<sub>2</sub>C<sub>6</sub>H<sub>3</sub>)-C<sub>6</sub>H<sub>4</sub>

**Im:** R = 3-Me-4-(3,4,5-F<sub>3</sub>C<sub>6</sub>H<sub>2</sub>)-C<sub>6</sub>H<sub>3</sub>

**In:** R = 3,5-(Et)<sub>2</sub>-4-(3,4,5-F<sub>3</sub>C<sub>6</sub>H<sub>2</sub>)-C<sub>6</sub>H<sub>2</sub>

**Ila:** R = Ph

**Ilb:** R = 4-MeOC<sub>6</sub>H<sub>4</sub>

**Ilc:** R = 4-*t*BuC<sub>6</sub>H<sub>4</sub>

**Ild:** R = 4-FC<sub>6</sub>H<sub>4</sub>

**Ile:** R = 4-CF<sub>3</sub>C<sub>6</sub>H<sub>4</sub>

**Ilf:** R = 3,5-(CF<sub>3</sub>)<sub>2</sub>C<sub>6</sub>H<sub>3</sub>

**Ilg:** R = 2,4,6-(*i*Pr)<sub>3</sub>C<sub>6</sub>H<sub>2</sub>

**Ilh:** R = 2-Me-4-*t*Bu-C<sub>6</sub>H<sub>3</sub>

**Ili:** R = 3,5-(Me)<sub>2</sub>-4-(3,4,5-F<sub>3</sub>C<sub>6</sub>H<sub>2</sub>)-C<sub>6</sub>H<sub>2</sub>

| entry            | CPA            | t (h) | yield of <b>4a'</b> (%) <sup>b</sup> | ee (%) <sup>c</sup> |
|------------------|----------------|-------|--------------------------------------|---------------------|
| 1                | <b>Ia</b> (10) | 96    | <b>4a'</b> , 13                      | 10                  |
| 2                | <b>Ib</b> (10) | 120   | <b>4a'</b> , 29                      | 36                  |
| 3                | <b>Ic</b> (10) | 96    | <b>4a'</b> , 31                      | 14                  |
| 4                | <b>Id</b> (10) | 35    | <b>4a'</b> , 32                      | 57                  |
| 5 <sup>d</sup>   | <b>Id</b> (10) | 48    | <b>4a'</b> , 77                      | 75                  |
| 6 <sup>d,e</sup> | <b>Id</b> (10) | 48    | <b>4a</b> , 78                       | 83                  |
| 7 <sup>d,e</sup> | <b>Ie</b> (10) | 48    | <b>4a</b> , 85                       | 85                  |
| 8                | <b>If</b> (10) | 96    | <b>4a'</b> , 13                      | 20                  |
| 9                | <b>Ig</b> (10) | 96    | <b>4a'</b> , 16                      | 20                  |
| 10               | <b>Ih</b> (10) | 120   | <b>4a'</b> , 24                      | 32                  |
| 11               | <b>Ii</b> (10) | 120   | <b>4a'</b> , 21                      | 40                  |

|    |          |     |                 |    |
|----|----------|-----|-----------------|----|
| 12 | Ij (10)  | 120 | <b>4a'</b> , 37 | 42 |
| 13 | Ik (10)  | 72  | <b>4a'</b> , 21 | 45 |
| 14 | Il (10)  | 72  | <b>4a'</b> , 26 | 48 |
| 15 | Im (10)  | 48  | <b>4a</b> , 87  | 84 |
| 16 | In (10)  | 48  | <b>4a</b> , 87  | 73 |
| 17 | Ila (10) | 120 | <b>4a</b> , 58  | 6  |
| 18 | Ilb (10) | 83  | <b>4a</b> , 66  | 23 |
| 19 | Ilc (10) | 36  | <b>4a</b> , 69  | 20 |
| 20 | Ild (10) | 18  | <b>4a</b> , 61  | 15 |
| 21 | Ile (10) | 84  | <b>4a</b> , 90  | 18 |
| 22 | Ilf (10) | 36  | <b>4a</b> , 71  | 39 |
| 23 | Ilg (10) | 120 | <b>4a</b> , 66  | 16 |
| 24 | Ilh (10) | 68  | <b>4a</b> , 63  | 3  |
| 25 | III (10) | 68  | <b>4a</b> , 62  | 15 |

<sup>a</sup>Unless noted otherwise, all reactions were conducted using **1a** (0.1 mmol), **2a** (0.1 mmol), **3a** (0.1 mmol), **CPA** (10 mol %) in toluene (1.0 mL) at 0 °C. <sup>b</sup>Isolated yield. <sup>c</sup>Determined by HPLC analysis. <sup>d</sup>With 5 Å MS (150 mg). <sup>e</sup>**2b** was employed instead of **2a**.

**Table S2.** The effect of molecular sieve on the reaction<sup>a</sup>

**Id:**

R = 4-(3,4,5-F<sub>3</sub>C<sub>6</sub>H<sub>2</sub>)-C<sub>6</sub>H<sub>4</sub>

| entry    | MS                  | t (h)     | yield of <b>4a</b> (%) <sup>b</sup> | ee of <b>4a</b> (%) <sup>c</sup> |
|----------|---------------------|-----------|-------------------------------------|----------------------------------|
| 1        | --                  | 35        | 32                                  | 57                               |
| 2        | 5 Å (25 mg)         | 72        | 23                                  | 78                               |
| 3        | 5 Å (50 mg)         | 72        | 39                                  | 83                               |
| 4        | 5 Å (100 mg)        | 48        | 76                                  | 83                               |
| <b>5</b> | <b>5 Å (150 mg)</b> | <b>48</b> | <b>78</b>                           | <b>83</b>                        |
| 6        | 4 Å (150 mg)        | 48        | 83                                  | 77                               |
| 7        | 3 Å (150 mg)        | 48        | 82                                  | 75                               |

<sup>a</sup>Unless noted otherwise, all reactions were conducted using **1a** (0.1 mmol), **2b** (0.1 mmol), **3a** (0.1 mmol), **Id** (10 mol %) in toluene (1.0 mL) at 0 °C under argon. <sup>b</sup>Isolated yield. <sup>c</sup>Determined by HPLC analysis.

**Table S3.** The effect of nitrogen acylating reagent on the reaction<sup>a</sup>

**Id:**

R = 4-(3,4,5-F<sub>3</sub>C<sub>6</sub>H<sub>2</sub>)-C<sub>6</sub>H<sub>4</sub>

| entry | R'              | yield of <b>4</b> (%) <sup>b</sup> | ee of <b>4</b> (%) <sup>c</sup> |
|-------|-----------------|------------------------------------|---------------------------------|
| 1     | Me              | 46                                 | 80                              |
| 2     | Et              | 78                                 | 83                              |
| 3     | <sup>t</sup> Bu | 77                                 | 75                              |

<sup>a</sup>Unless noted otherwise, all reactions were conducted using **1a** (0.1 mmol), **2** (0.1 mmol), **3a** (0.1 mmol), 5 Å MS (150 mg), **Id** (10 mol %) in toluene (1.0 mL) at 0 °C for 48 h under argon. <sup>b</sup>Isolated yield. <sup>c</sup>Determined by HPLC analysis.

**Table S4.** The effect of phosphonate ester on the reaction<sup>a</sup>



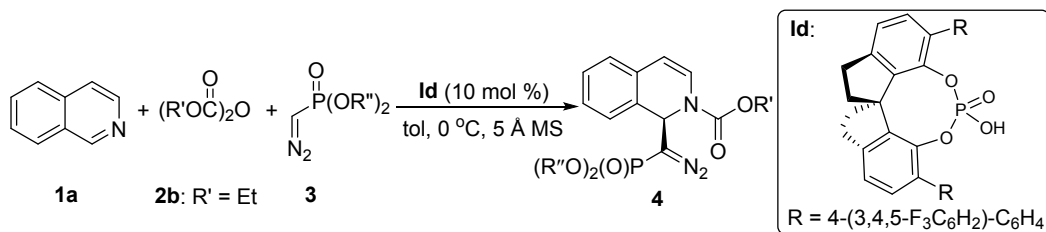

| Entry | R''             | yield of <b>4</b> (%) <sup>b</sup> | ee of <b>4</b> (%) <sup>c</sup> |
|-------|-----------------|------------------------------------|---------------------------------|
| 1     | Me              | 80                                 | 83                              |
| 2     | Et              | 85                                 | 74                              |
| 3     | <sup>i</sup> Pr | 83                                 | 75                              |
| 4     | <sup>t</sup> Bu | 90                                 | 73                              |

<sup>a</sup>Unless noted otherwise, all reactions were conducted using **1a** (0.1 mmol), **2b** (0.1 mmol), **3** (0.1 mmol), 5 Å MS (150 mg), **Id** (10 mol %) in toluene (1.0 mL) at 0 °C for 48 h under argon. <sup>b</sup>Isolated yield. <sup>c</sup>Determined by HPLC analysis.

**Table S5.** The effect of ratio of **1a/2b/3a** on the reaction<sup>a</sup>

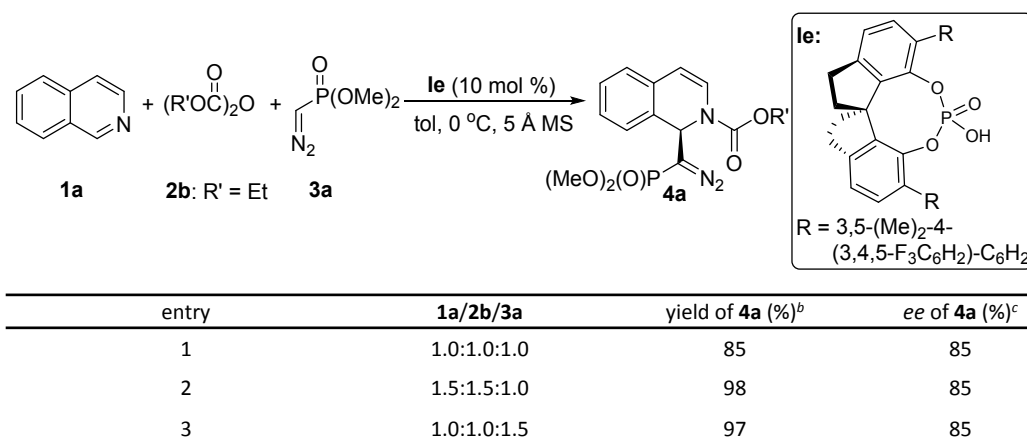

| entry | <b>1a/2b/3a</b> | yield of <b>4a</b> (%) <sup>b</sup> | ee of <b>4a</b> (%) <sup>c</sup> |
|-------|-----------------|-------------------------------------|----------------------------------|
| 1     | 1.0:1.0:1.0     | 85                                  | 85                               |
| 2     | 1.5:1.5:1.0     | 98                                  | 85                               |
| 3     | 1.0:1.0:1.5     | 97                                  | 85                               |

<sup>a</sup>Unless noted otherwise, all reactions were conducted using **1a**, **2b**, **3a** (0.1 mmol), 5 Å MS (150 mg), **Id** (10 mol %) in toluene (1.0 mL) at 0 °C for 48 h under argon. <sup>b</sup>Isolated yield. <sup>c</sup>Determined by HPLC analysis.

**Table S6.** Optimization reaction temperature<sup>a</sup>

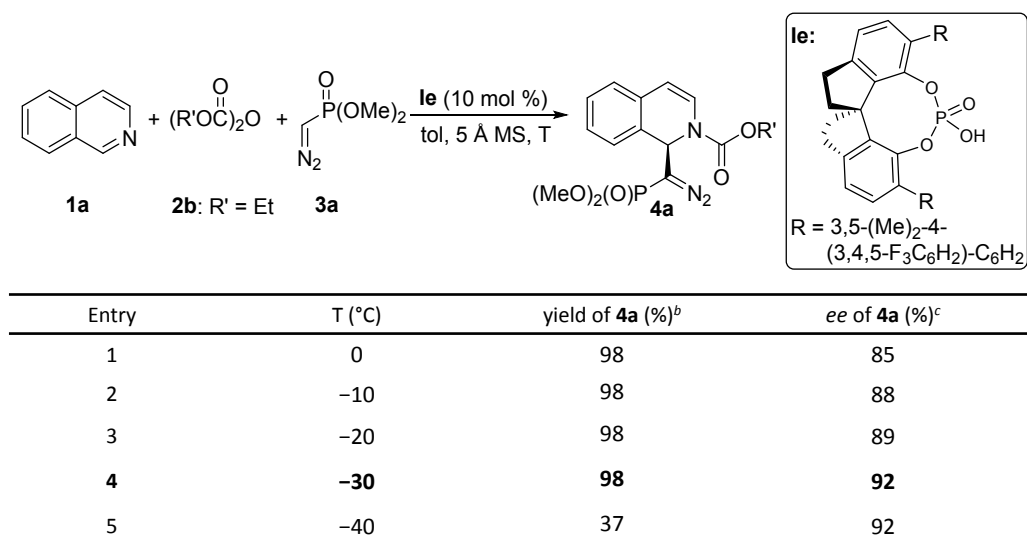

| Entry    | T (°C)     | yield of <b>4a</b> (%) <sup>b</sup> | ee of <b>4a</b> (%) <sup>c</sup> |
|----------|------------|-------------------------------------|----------------------------------|
| 1        | 0          | 98                                  | 85                               |
| 2        | -10        | 98                                  | 88                               |
| 3        | -20        | 98                                  | 89                               |
| <b>4</b> | <b>-30</b> | <b>98</b>                           | <b>92</b>                        |
| 5        | -40        | 37                                  | 92                               |

<sup>a</sup>Unless noted otherwise, all reactions were conducted using **1a** (0.15 mmol), **2b** (0.15 mmol), **3** (0.1 mmol), 5 Å MS (150 mg), **Id** (10 mol %) in toluene (1.0 mL) for 48 h under argon. <sup>b</sup>Isolated yield. <sup>c</sup>Determined by HPLC analysis.

**Table S7.** The effect of catalyst loading **1e** on the reaction<sup>a</sup>

**1a**      **2b:** R' = Et      **3a**

(MeO)<sub>2</sub>(O)P      **4a**

**1e:**

R = 3,5-(Me)<sub>2</sub>-4-(3,4,5-F<sub>3</sub>C<sub>6</sub>H<sub>2</sub>)-C<sub>6</sub>H<sub>2</sub>

| entry | x  | yield of <b>4a</b> (%) <sup>b</sup> | ee of <b>4a</b> (%) <sup>c</sup> |
|-------|----|-------------------------------------|----------------------------------|
| 1     | 5  | 76                                  | 89                               |
| 2     | 10 | 98                                  | 92                               |
| 3     | 15 | 89                                  | 92                               |

<sup>a</sup>Unless noted otherwise, all reactions were conducted using **1a** (0.15 mmol), **2b** (0.15 mmol), **3** (0.1 mmol) 5 Å MS (150 mg) in toluene (1.0 mL) at -30 °C for 48 h under argon. <sup>b</sup>Isolated yield. <sup>c</sup>Determined by HPLC analysis

**Table S8.** The effect of solvent on the reaction<sup>a</sup>

**1a**      **2b:** R' = Et      **3a**

(MeO)<sub>2</sub>(O)P      **4a**

**1e:**

R = 3,5-(Me)<sub>2</sub>-4-(3,4,5-F<sub>3</sub>C<sub>6</sub>H<sub>2</sub>)-C<sub>6</sub>H<sub>2</sub>

| Entry | solvent    | yield of <b>4a</b> (%) <sup>b</sup> | ee of <b>4a</b> (%) <sup>c</sup> |
|-------|------------|-------------------------------------|----------------------------------|
| 1     | PhMe       | 98                                  | 92                               |
| 2     | DCM        | 60                                  | 83                               |
| 3     | THF        | 54                                  | 89                               |
| 4     | PhCl       | 98                                  | 91                               |
| 5     | PhF        | 98                                  | 87                               |
| 6     | PhEt       | 91                                  | 91                               |
| 7     | xylene     | 91                                  | 92                               |
| 8     | mesitylene | 85                                  | 92                               |

<sup>a</sup>Unless noted otherwise, all reactions were conducted using **1a** (0.15 mmol), **2b** (0.15 mmol), **3** (0.1 mmol), 5 Å MS (150 mg), **1e** (10 mol %) at -30 °C for 48 h under argon. <sup>b</sup>Isolated yield. <sup>c</sup>Determined by HPLC analysis

#### 4. Optimization of the diazocarbonate with isoquinolines reaction conditions

**Table S9.** Asymmetric acyl-Mannich reaction of diazocarbonate with isoquinolines catalyzed by **1e**<sup>a</sup>

**1**      **2b**      **5**

**6**

| entry | R <sup>1</sup> | R <sup>2</sup>  | T (°C) | t (h) | yield of <b>6</b> (%) <sup>b</sup> | ee of <b>6</b> (%) <sup>c</sup> |
|-------|----------------|-----------------|--------|-------|------------------------------------|---------------------------------|
| 1     | H              | Me              | -30    | 48    | 79                                 | 77                              |
| 2     | H              | Et              | -30    | 48    | 78                                 | 86                              |
| 3     | H              | <sup>i</sup> Pr | -30    | 48    | 72                                 | 84                              |
| 4     | H              | <sup>t</sup> Bu | -30    | 72    | 71                                 | 72                              |

|    |                    |    |     |    |       |    |
|----|--------------------|----|-----|----|-------|----|
| 5  | H                  | Et | -10 | 40 | 95    | 84 |
| 6  | H                  | Et | -20 | 68 | 93    | 84 |
| 7  | H                  | Et | -40 | 92 | 54    | 84 |
| 8  | 6-Cl               | Et | -30 | 96 | 33    | 86 |
| 9  | 5-Br               | Et | -30 | 96 | 45    | 85 |
| 10 | 6-Br               | Et | -30 | 96 | 84    | 89 |
| 11 | 6-Me               | Et | -30 | 96 | 53    | 87 |
| 12 | 6-Et               | Et | -30 | 96 | 85    | 84 |
| 13 | 6-F                | Et | -30 | 96 | 65    | 88 |
| 14 | 6- <sup>t</sup> Bu | Et | -30 | 96 | 50    | 75 |
| 15 | 6-OMe              | Et | -30 | 96 | 29    | 86 |
| 16 | 5-OMe              | Et | -30 | 96 | 57    | 80 |
| 17 | 8-Br               | Et | -30 | 96 | trace | -- |

<sup>a</sup>Conditions: Unless noted otherwise, all of the reactions were carried out with **1** (0.15 mmol), **2b** (0.15 mmol), **5** (0.10 mmol), **1e** (10 mol %) and 5 Å MS (150 mg) in 1.0 mL of anhydrous toluene; <sup>b</sup>Isolated yield; <sup>c</sup>Determined by chiral HPLC

We have tried to extend the nucleophile from α-(diazomethyl)phosphonate to alkyl diazoacetate **5** under the optimized reaction conditions for α-(diazomethyl)phosphonate (Table S9). After preliminary investigated the influence of R<sup>2</sup> and reaction temperature on the reaction (Table S9, entries 1–7), we found that good results could be achieved when R<sup>2</sup> was ethyl and the reaction proceeded at -30 °C. We also attempted to check the substrates accommodation at this conditions (Table S9, entries 8–16). These results were not satisfactory. Therefore, we further investigate other catalysts as **1a-1c**, **1e**, **1f**, **1h** and **1o** (Scheme S1), gratifying, excellent results were observed when the reaction was catalyzed by **1c**. So the optimized reaction conditions for ethyl diazoacetate were identified as: **1c** (10 mol %) as catalyst in toluene at -20 °C with 5 Å MS as additive and a **1a/2b/5a** ratio of 1.5:1.5:1.

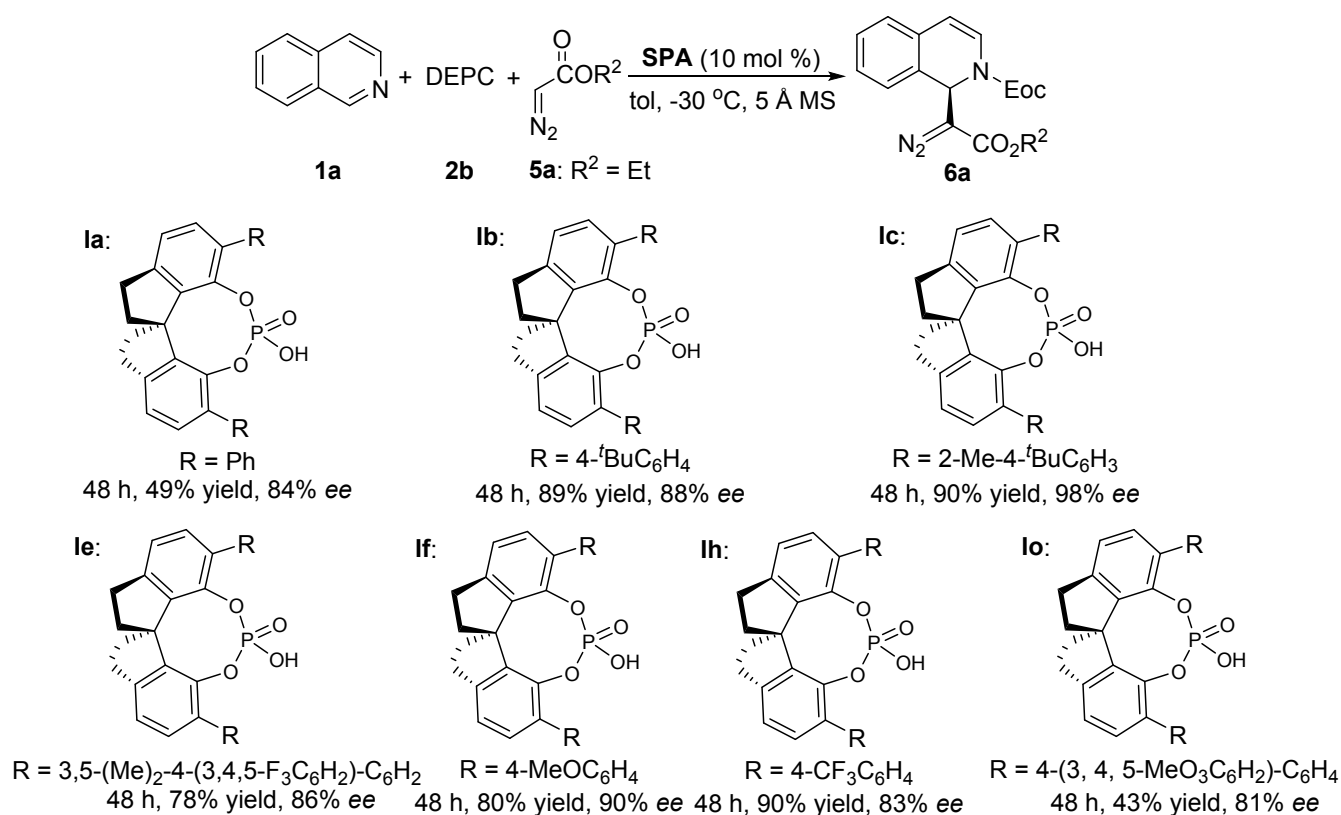

Scheme S1. Catalyst screening for the diazocarbonate with isoquinolines reaction

## 5. General procedure for asymmetric acyl-Mannich reaction

### 5.1. General procedure for asymmetric acyl-Mannich reaction of diazomethylphosphonate with isoquinolines

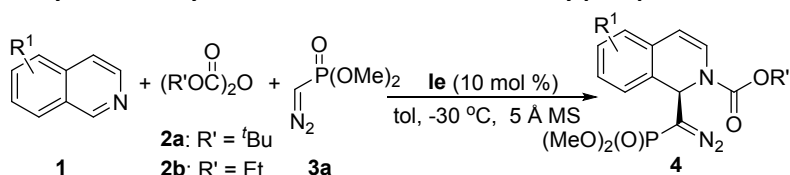

Isoquinoline **1** (0.15 mmol) and diethyl pyrocarbonate **2a** or **2b** (Boc<sub>2</sub>O, 0.15 mmol) were added to a pre-dried tube under argon and stirred for 10 min at room temperature. Next, anhydrous toluene (1 mL), 5 Å MS (150 mg) and SPA **le** (0.01 mmol) was added and the system was cooled to -30 °C. The (diazomethyl)phosphonate **3a** (0.1 mmol) was then added and the mixture was stirred and monitored by TLC until **3a** had been completely consumed. The reaction mixture was then purified directly by flash chromatography on silica gel (30–50% AcOEt/petroleum ether) to obtain the corresponding product **4**.

#### Tert-butyl (*R*)-1-(diazo(dimethoxyphosphoryl)methyl)isoquinoline-2(1H)-carboxylate (**4a'**)

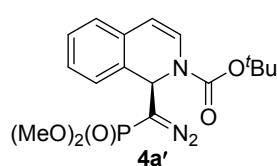

Yellow oil, <sup>1</sup>H NMR (600 MHz, CDCl<sub>3</sub>) δ 7.26 – 7.17 (m, 3H), 7.14 – 6.82 (m, 2H), 6.18 – 5.78 (m, 2H), 3.75 – 3.46 (m, 6H), 1.54 (d, *J* = 23.8 Hz, 9H) ppm; <sup>13</sup>C NMR (151 MHz, CDCl<sub>3</sub>) δ 151.5, 130.6, 128.5, 128.2, 127.4, 126.4, 125.4, 124.8, 108.2, 82.3, 52.6, 51.9, 47.2 (d, *J* = 233.1 Hz), 28.1 ppm.

### 5.2. General procedure for asymmetric acyl-Mannich reaction of diazocarbonate with isoquinolines

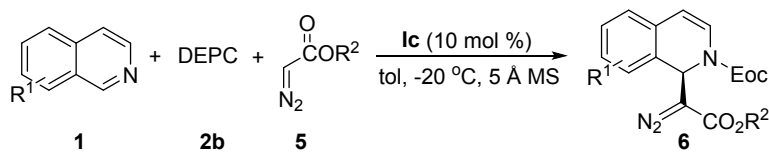

Isoquinoline **1** (0.15 mmol) and diethyl pyrocarbonate **2b** (DEPC, 0.15 mmol) were added to a pre-dried tube under argon and stirred for 10 min at room temperature. Next, anhydrous toluene (1 mL), 5 Å MS (150 mg) and SPA **lc** (0.01 mmol) was added and the system was cooled to -20 °C. The α-diazo carbonate **5** (0.1 mmol) was then added and the mixture was stirred and monitored by TLC until **5** had been completely consumed. The reaction mixture was then purified directly by flash chromatography on silica gel (5–10% AcOEt/petroleum ether) to obtain the corresponding product **6**.

## 6. Characterization of the acyl-Mannich reaction products

#### Ethyl (*R*)-1-(diazo(dimethoxyphosphoryl)methyl)isoquinoline-2(1H)-carboxylate (**4a**)

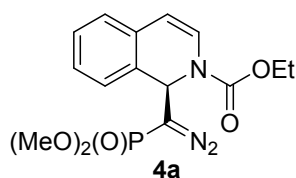

Yellow oil, [α]<sub>25</sub> D = +400.3° (*c* = 0.37, *i*-PrOH); HPLC condition: chiralpak IA, 254 nm, 0.5 mL/min, n-hexane/*i*-PrOH = 70/30, *t*<sub>major</sub> = 14.825 min, *t*<sub>minor</sub> = 12.409 min, *ee* = 92%; <sup>1</sup>H NMR (600 MHz, CDCl<sub>3</sub>) δ 7.25 (m, 3H), 7.15 – 6.85 (m, 2H), 6.25 – 5.78 (m, 2H), 4.38 – 4.23 (m, 2H), 3.72 (d, *J* = 11.7 Hz, 3H), 3.61 – 3.53 (m, 3H), 1.38–1.24 (m, 3H) ppm; <sup>13</sup>C NMR (151 MHz, CDCl<sub>3</sub>) δ 152.8, 130.3, 128.6, 128.1, 127.6, 126.5, 125.2, 125.0, 124.6, 108.9 (d, *J* = 42.5 Hz), 62.8, 53.1, 52.8, 47.4 (d, *J* = 227.4 Hz), 14.4. ppm; HRMS (ESI) *m/z*: [M+Na]<sup>+</sup> Calcd for C<sub>15</sub>H<sub>18</sub>N<sub>3</sub>O<sub>5</sub>PNa<sup>+</sup> 374.0882; Found 374.0880.

#### Ethyl (*R*)-1-(diazo(dimethoxyphosphoryl)methyl)-4-phenylisoquinoline-2(1H)-carboxylate (**4b**)

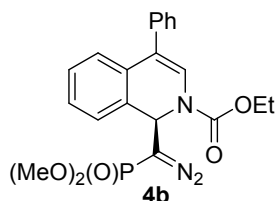

Yellow oil, [α]<sub>25</sub> D = +161.8° (*c* = 0.80, EA); HPLC condition: chiralpak IA, 254 nm, 0.5 mL/min, n-hexane/*i*-PrOH = 70/30, *t*<sub>major</sub> = 20.259 min, *t*<sub>minor</sub> = 17.792 min, *ee* = 94%; <sup>1</sup>H NMR (600 MHz, CDCl<sub>3</sub>) δ 7.45 – 7.32 (m, 6H), 7.30 (t, *J* = 7.4 Hz, 1H), 7.23 (t, *J* = 7.0 Hz, 1H), 7.16 – 6.89 (m, 2H), 6.32 – 6.15 (m, 1H), 4.41 – 4.24 (m, 2H), 3.75 (d, *J* = 10.4 Hz, 3H), 3.62 – 3.57 (m, 3H), 1.47 – 1.28 (m, 3H). ppm. <sup>13</sup>C NMR (151 MHz, CDCl<sub>3</sub>) δ 152.8, 136.8, 131.2, 128.7, 128.6, 128.4, 127.9, 127.5, 126.4, 124.3, 123.4, 122.8, 62.8, 53.3, 53.0, 52.8, 46.8 (d, *J* = 253.2 Hz), 14.4 ppm; HRMS (ESI) *m/z*: [M+Na]<sup>+</sup> Calcd for C<sub>21</sub>H<sub>22</sub>N<sub>3</sub>O<sub>5</sub>PNa<sup>+</sup> 450.1189; Found 450.1189.

**Ethyl (R)-5-chloro-1-(diazo(dimethoxyphosphoryl)methyl)isoquinoline-2(1H)-carboxylate (4c)**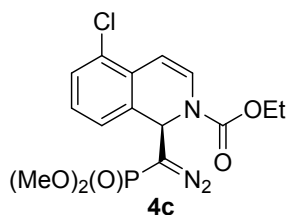

Yellow oil,  $[\alpha]_{25}^D = +76.5^\circ$  ( $c = 0.44$ ,  $^i\text{PrOH}$ ); HPLC condition: chiralpak IA, 254 nm, 0.5 mL/min, n-hexane/ $i$ -PrOH = 70/30,  $t_{\text{major}} = 13.255$  min,  $t_{\text{minor}} = 10.716$  min,  $ee = 93\%$ ;  $^1\text{H}$  NMR (600 MHz,  $\text{CDCl}_3$ )  $\delta$  7.35–7.28 (m, 1H), 7.17–7.01 (m, 3H), 6.27–6.12 (m, 2H), 4.32–4.29 (m, 2H), 3.72 (d,  $J = 11.7$  Hz, 3H), 3.58 (d,  $J = 15.0$  Hz, 3H), 1.39–1.35 (m, 3H) ppm;  $^{13}\text{C}$  NMR (151 MHz,  $\text{CDCl}_3$ )  $\delta$  152.6, 130.1, 130.0, 129.4, 128.1, 126.2, 125.1, 104.9, 63.1, 52.9, 52.4, 47.5 (d,  $J = 229.3$  Hz), 14.4. ppm; HRMS (ESI)  $m/z$ :  $[\text{M}+\text{Na}]^+$  Calcd for  $\text{C}_{15}\text{H}_{17}\text{ClN}_3\text{O}_5\text{PNa}^+$  408.0492; Found 408.0492.

**Ethyl (R)-5-bromo-1-(diazo(dimethoxyphosphoryl)methyl)isoquinoline-2(1H)-carboxylate (4d)**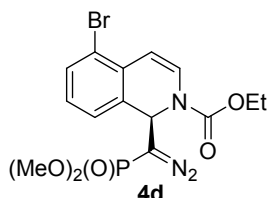

Yellow oil,  $[\alpha]_{25}^D = +110.9^\circ$  ( $c = 0.38$ ,  $^i\text{PrOH}$ ); HPLC condition: chiralpak IA, 254 nm, 0.5 mL/min, n-hexane/ $i$ -PrOH = 70/30,  $t_{\text{major}} = 13.524$  min,  $t_{\text{minor}} = 10.851$  min,  $ee = 92\%$ ;  $^1\text{H}$  NMR (600 MHz,  $\text{CDCl}_3$ )  $\delta$  7.50 (d,  $J = 7.9$  Hz, 1H), 7.21 (d,  $J = 7.4$  Hz, 1H), 7.17–6.96 (m, 2H), 6.25–6.11 (m, 2H), 4.31 (dd,  $J = 13.8, 6.8$  Hz, 2H), 3.70 (t,  $J = 18.6$  Hz, 3H), 3.58 (d,  $J = 13.5$  Hz, 3H), 1.37–1.34 (m, 3H). ppm;  $^{13}\text{C}$  NMR (151 MHz,  $\text{CDCl}_3$ )  $\delta$  152.5, 132.7, 130.04, 128.4, 127.0, 126.4, 125.8, 120.4, 107.4, 63.1, 53.1, 52.9, 52.4, 47.5 (d,  $J = 229.2$  Hz), 14.4. ppm; HRMS

(ESI)  $m/z$ :  $[\text{M}+\text{Na}]^+$  Calcd for  $\text{C}_{15}\text{H}_{17}\text{BrN}_3\text{O}_5\text{PNa}^+$  451.9987; Found 451.9981.

**Ethyl (R)-1-(diazo(dimethoxyphosphoryl)methyl)-5-nitroisoquinoline-2(1H)-carboxylate (4e)**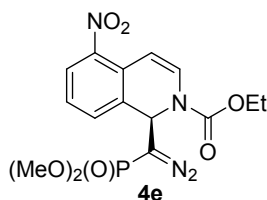

Yellow oil,  $[\alpha]_{25}^D = +3.4^\circ$  ( $c = 0.24$ ,  $^i\text{PrOH}$ ); HPLC condition: chiralpak IA, 254 nm, 0.5 mL/min, n-hexane/ $i$ -PrOH = 70/30,  $t_{\text{major}} = 17.264$  min,  $t_{\text{minor}} = 14.183$  min,  $ee = 92\%$ ;  $^1\text{H}$  NMR (600 MHz,  $\text{CDCl}_3$ )  $\delta$  7.96 (d,  $J = 8.2$  Hz, 1H), 7.55 (d,  $J = 7.4$  Hz, 1H), 7.35 (t,  $J = 7.9$  Hz, 1H), 7.15 (s, 1H), 6.59 (s, 1H), 6.24 (s, 1H), 4.36–4.33 (m, 2H), 3.74 (d,  $J = 11.7$  Hz, 3H), 3.59 (s, 3H), 1.37 (s, 3H) ppm;  $^{13}\text{C}$  NMR (151 MHz,  $\text{CDCl}_3$ )  $\delta$  152.4, 144.5, 131.8, 130.8, 129.1, 127.2, 125.2, 102.7, 63.6, 53.2, 53.0, 53.0, 47.9 (d,  $J = 230.0$  Hz), 14.3 ppm; HRMS (ESI)  $m/z$ :  $[\text{M}+\text{Na}]^+$  Calcd for  $\text{C}_{15}\text{H}_{17}\text{N}_4\text{O}_7\text{PNa}^+$  419.0733; Found 419.0741.

**Ethyl (R)-1-(diazo(dimethoxyphosphoryl)methyl)-5-methoxyisoquinoline-2(1H)-carboxylate (4f)**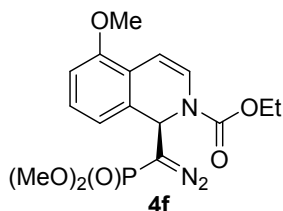

Yellow oil,  $[\alpha]_{25}^D = +28.0^\circ$  ( $c = 0.74$ ,  $^i\text{PrOH}$ ); HPLC condition: chiralpak IA, 254 nm, 0.5 mL/min, n-hexane/ $i$ -PrOH = 70/30,  $t_{\text{major}} = 15.823$  min,  $t_{\text{minor}} = 13.686$  min,  $ee = 89\%$ ;  $^1\text{H}$  NMR (600 MHz,  $\text{CDCl}_3$ )  $\delta$  7.20 (t,  $J = 7.9$  Hz, 1H), 7.01–6.84 (m, 2H), 6.78 (d,  $J = 8.2$  Hz, 1H), 6.34–6.02 (m, 2H), 4.40–4.22 (m, 2H), 3.84 (s, 3H), 3.74 (d,  $J = 10.7$  Hz, 3H), 3.63–3.56 (m, 3H), 1.37–1.32 (m, 3H) ppm.  $^{13}\text{C}$  NMR (151 MHz,  $\text{CDCl}_3$ )  $\delta$  154.0, 152.8, 129.3, 128.4, 124.3, 123.7, 119.7, 118.7, 110.1, 103.7, 62.8, 55.6, 52.8, 52.1, 47.0 (d,  $J = 227.2$  Hz), 14.4 ppm; HRMS (ESI)  $m/z$ :  $[\text{M}+\text{Na}]^+$  Calcd for  $\text{C}_{16}\text{H}_{20}\text{N}_3\text{O}_6\text{PNa}^+$  404.0987; Found 404.0991.

**Ethyl (R)-1-(diazo(dimethoxyphosphoryl)methyl)-6-fluoroisoquinoline-2(1H)-carboxylate (4g)**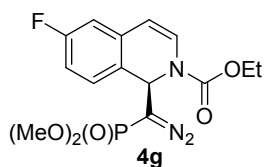

Yellow solid, mp 74.9–76.0  $^\circ\text{C}$ ,  $[\alpha]_{25}^D = +99.9^\circ$  ( $c = 0.35$ ,  $^i\text{PrOH}$ ); HPLC condition: chiralpak IA, 254 nm, 0.5 mL/min, n-hexane/ $i$ -PrOH = 70/30,  $t_{\text{major}} = 16.756$  min,  $t_{\text{minor}} = 12.071$  min,  $ee = 95\%$ ;  $^1\text{H}$  NMR (600 MHz,  $\text{CDCl}_3$ )  $\delta$  7.25–6.87 (m, 3H), 6.81 (d,  $J = 8.5$  Hz, 1H), 6.18–5.78 (m, 2H), 4.29 (d,  $J = 6.8$  Hz, 2H), 3.88–3.28 (m, 6H), 1.32 (t,  $J = 39.1$  Hz, 3H) ppm;  $^{13}\text{C}$  NMR (151 MHz,  $\text{CDCl}_3$ )  $\delta$  162.6 (d,  $J = 246.9$  Hz), 152.7, 132.4, 128.2, 126.4, 125.8, 123.9, 114.4 (d,  $J = 22.4$  Hz), 111.4 (d,  $J = 21.4$  Hz), 107.8, 63.1, 52.8, 52.1, 47.6 (d,  $J = 229.1$  Hz), 14.4 ppm. HRMS (ESI)

$m/z$ :  $[\text{M}+\text{Na}]^+$  Calcd for  $\text{C}_{15}\text{H}_{17}\text{FN}_3\text{O}_5\text{PNa}^+$  392.0788; Found 392.0785.

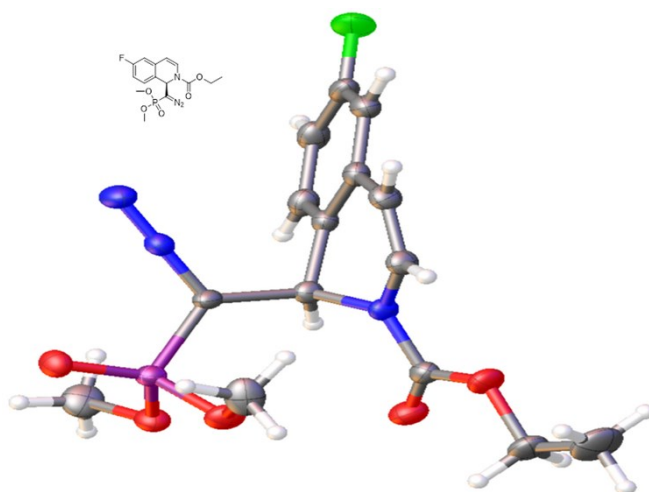

**Table S10.** Crystal data and structure refinement for **4g**

|                                             |                                                                  |
|---------------------------------------------|------------------------------------------------------------------|
| Empirical formula                           | C <sub>15</sub> H <sub>17</sub> FN <sub>3</sub> O <sub>5</sub> P |
| Formula weight                              | 369.29                                                           |
| Temperature/K                               | 149.99(10)                                                       |
| Crystal system                              | monoclinic                                                       |
| Space group                                 | P2 <sub>1</sub>                                                  |
| a/Å                                         | 11.2111(2)                                                       |
| b/Å                                         | 6.05545(12)                                                      |
| c/Å                                         | 13.6909(3)                                                       |
| α/°                                         | 90                                                               |
| β/°                                         | 112.986(3)                                                       |
| γ/°                                         | 90                                                               |
| Volume/Å <sup>3</sup>                       | 855.66(3)                                                        |
| Z                                           | 2                                                                |
| ρ <sub>calc</sub> /cm <sup>3</sup>          | 1.462                                                            |
| μ/mm <sup>-1</sup>                          | 1.831                                                            |
| F(000)                                      | 393.0                                                            |
| Crystal size/mm <sup>3</sup>                | 0.2 × 0.05 × 0.02                                                |
| Radiation                                   | CuKα (λ = 1.54184)                                               |
| 2θ range for data collection/°              | 7.014 to 146.1                                                   |
| Index ranges                                | -13 ≤ h ≤ 13, -7 ≤ k ≤ 4, -16 ≤ l ≤ 16                           |
| Reflections collected                       | 8887                                                             |
| Independent reflections                     | 2756 [R <sub>int</sub> = 0.0403, R <sub>sigma</sub> = 0.0400]    |
| Data/restraints/parameters                  | 2756/1/229                                                       |
| Goodness-of-fit on F <sup>2</sup>           | 0.990                                                            |
| Final R indexes [I > 2σ (I)]                | R <sub>1</sub> = 0.0405, wR <sub>2</sub> = 0.1041                |
| Final R indexes [all data]                  | R <sub>1</sub> = 0.0425, wR <sub>2</sub> = 0.1070                |
| Largest diff. peak/hole / e Å <sup>-3</sup> | 0.27/-0.36                                                       |

Ethyl (*R*)-6-chloro-1-(diazodimethoxyphosphoryl)methylisoquinoline-2(1*H*)-carboxylate (**4h**)

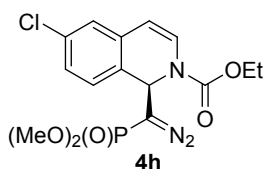

Yellow oil,  $[\alpha]_{25}^D = +46.9^\circ$  ( $c = 0.64$ ,  $i$ PrOH); HPLC condition: chiralpak IA, 254 nm, 0.5 mL/min, n-hexane/ $i$ -PrOH = 70/30,  $t_{major} = 22.346$  min,  $t_{minor} = 12.315$  min,  $ee = 95\%$ ;  $^1\text{H}$  NMR (600 MHz,  $\text{CDCl}_3$ )  $\delta$  7.20 (s, 2H), 7.14–6.88 (m, 2H), 6.15–5.75 (m, 2H), 4.31–4.28 (m, 2H), 3.72 (d,  $J = 11.7$  Hz, 3H), 3.58 (dd,  $J = 10.6$ , 5.8 Hz, 3H), 1.47–1.28 (m, 3H) ppm;  $^{13}\text{C}$  NMR (151 MHz,  $\text{CDCl}_3$ )  $\delta$  152.7, 134.4, 131.9, 127.8, 127.4, 126.4, 125.9, 124.6, 107.4, 63.1, 52.8, 52.1, 47.6 (d,  $J = 228.8$  Hz), 14.4 ppm; HRMS (ESI)  $m/z$ :  $[\text{M}+\text{Na}]^+$  Calcd for  $\text{C}_{15}\text{H}_{17}\text{ClN}_3\text{O}_5\text{PNa}^+$  408.0492; Found 408.0489.

#### Ethyl (R)-6-bromo-1-(diazo(dimethoxyphosphoryl)methyl)isoquinoline-2(1H)-carboxylate (4i)

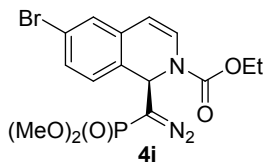

Yellow oil,  $[\alpha]_{25}^D = +31.9^\circ$  ( $c = 0.54$ ,  $i$ PrOH); HPLC condition: chiralpak IA, 254 nm, 0.5 mL/min, n-hexane/ $i$ -PrOH = 70/30,  $t_{major} = 25.687$  min,  $t_{minor} = 12.392$  min,  $ee = 90\%$ ;  $^1\text{H}$  NMR (600 MHz,  $(\text{CD}_3)_2\text{CO}$ )  $\delta$  7.45 (dd,  $J = 8.1$ , 2.0 Hz, 1H), 7.41–7.37 (m, 2H), 7.08 (s, 1H), 6.27 (d,  $J = 8.8$  Hz, 1H), 5.95 (s, 1H), 4.33–4.28 (m, 2H), 3.70 (d,  $J = 11.7$  Hz, 3H), 3.53 (d,  $J = 11.8$  Hz, 3H), 1.34 (s, 3H) ppm.  $^{13}\text{C}$  NMR (151 MHz,  $(\text{CD}_3)_2\text{CO}$ )  $\delta$  153.5, 133.9, 131.0, 129.6, 128.4, 128.4, 128.2, 127.3, 122.8, 107.9, 63.7, 53.3, 53.1, 48.2 (d,  $J = 223.1$  Hz), 14.7 ppm; HRMS (ESI)  $m/z$ :  $[\text{M}+\text{Na}]^+$  Calcd for  $\text{C}_{15}\text{H}_{17}\text{BrN}_3\text{O}_5\text{PNa}^+$  451.9987; Found 451.9994.

#### Ethyl (R)-1-(diazo(dimethoxyphosphoryl)methyl)-6-methoxyisoquinoline-2(1H)-carboxylate (4j)

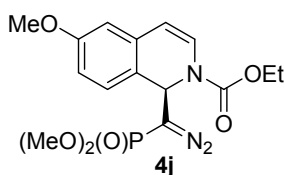

Yellow oil,  $[\alpha]_{25}^D = +41.4^\circ$  ( $c = 0.46$ ,  $i$ PrOH); HPLC condition: chiralpak IA, 254 nm, 0.5 mL/min, n-hexane/ $i$ -PrOH = 70/30,  $t_{major} = 23.653$  min,  $t_{minor} = 12.824$  min,  $ee = 84\%$ ;  $^1\text{H}$  NMR (600 MHz,  $\text{CDCl}_3$ )  $\delta$  7.17 (d,  $J = 7.6$  Hz, 1H), 7.11–6.72 (m, 2H), 6.63 (s, 1H), 6.16–5.79 (m, 2H), 4.28 (d,  $J = 6.4$  Hz, 2H), 3.80 (s, 3H), 3.77–3.52 (m, 6H), 1.38–1.33 (m, 3H) ppm;  $^{13}\text{C}$  NMR (151 MHz,  $\text{CDCl}_3$ )  $\delta$  159.8, 152.7, 131.5, 127.6, 125.6, 125.0, 120.6, 113.5, 109.8, 108.8, 62.8, 55.3, 52.8, 52.2, 47.4 (d,  $J = 228.2$  Hz), 14.4 ppm; HRMS (ESI)  $m/z$ :  $[\text{M}+\text{Na}]^+$  Calcd for  $\text{C}_{16}\text{H}_{20}\text{N}_3\text{O}_6\text{PNa}^+$  404.0987; Found 404.0992.

#### Ethyl (R)-1-(diazo(dimethoxyphosphoryl)methyl)-6-methylisoquinoline-2(1H)-carboxylate (4k)

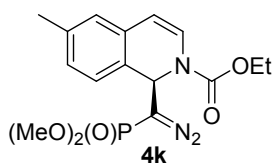

Yellow oil,  $[\alpha]_{25}^D = +32.6^\circ$  ( $c = 0.66$ ,  $i$ PrOH); HPLC condition: chiralpak IA, 254 nm, 0.5 mL/min, n-hexane/ $i$ -PrOH = 70/30,  $t_{major} = 20.506$  min,  $t_{minor} = 11.930$  min,  $ee = 91\%$ ;  $^1\text{H}$  NMR (600 MHz,  $(\text{CD}_3)_2\text{CO}$ )  $\delta$  7.27 (d,  $J = 7.2$  Hz, 1H), 7.12 (d,  $J = 7.7$  Hz, 1H), 7.01 (d,  $J = 17.2$  Hz, 2H), 6.21 (d,  $J = 7.7$  Hz, 1H), 5.93 (d,  $J = 24.9$  Hz, 1H), 4.35–4.20 (m, 2H), 3.71 (d,  $J = 11.4$  Hz, 3H), 3.54 (d,  $J = 11.8$  Hz, 3H), 2.32 (s, 3H), 1.34 (s, 3H) ppm.  $^{13}\text{C}$  NMR (151 MHz,  $(\text{CD}_3)_2\text{CO}$ )  $\delta$  153.6, 139.2, 131.5, 129.2, 127.2, 126.6, 126.3, 125.8, 109.7, 63.4, 53.3, 53.2, 53.0, 48.0 (d,  $J = 222.4$  Hz), 21.2, 14.7 ppm; HRMS (ESI)  $m/z$ :  $[\text{M}+\text{Na}]^+$  Calcd for  $\text{C}_{16}\text{H}_{20}\text{N}_3\text{O}_5\text{PNa}^+$  388.1038; Found 388.1041.

#### Ethyl (R)-1-(diazo(dimethoxyphosphoryl)methyl)-6-ethylisoquinoline-2(1H)-carboxylate (4l)

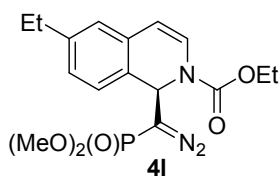

Yellow oil,  $[\alpha]_{25}^D = +63.1^\circ$  ( $c = 0.68$ ,  $i$ PrOH); HPLC condition: chiralpak IA, 254 nm, 0.5 mL/min, n-hexane/ $i$ -PrOH = 70/30,  $t_{major} = 22.588$  min,  $t_{minor} = 11.772$  min,  $ee = 91\%$ ;  $^1\text{H}$  NMR (600 MHz,  $\text{CDCl}_3$ )  $\delta$  7.16 (d,  $J = 7.4$  Hz, 1H), 7.07 (d,  $J = 7.5$  Hz, 1H), 7.04–6.81 (m, 2H), 6.16–5.81 (m, 2H), 4.27 (d,  $J = 6.9$  Hz, 2H), 3.72 (d,  $J = 11.7$  Hz, 3H), 3.60–3.53 (m, 3H), 2.61 (q,  $J = 7.5$  Hz, 2H), 1.37–1.32 (m, 3H), 1.21 (t,  $J = 7.6$  Hz, 3H) ppm;  $^{13}\text{C}$  NMR (151 MHz,  $\text{CDCl}_3$ )  $\delta$  152.8, 144.8, 130.1, 127.2, 126.4, 125.6, 125.1, 124.3, 109.0, 62.8, 53.0, 52.7, 52.3, 47.3 (d,  $J = 228.3$  Hz), 28.5, 15.3, 14.4 ppm; HRMS (ESI)  $m/z$ :  $[\text{M}+\text{Na}]^+$  Calcd for  $\text{C}_{17}\text{H}_{22}\text{N}_3\text{O}_5\text{PNa}^+$  402.1195; Found 402.1209.

#### Ethyl (R)-1-(diazo(dimethoxyphosphoryl)methyl)-6-isopropylisoquinoline-2(1H)-carboxylate (4m)

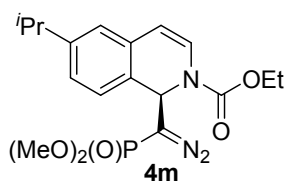

Yellow oil,  $[\alpha]_{25}^D = +43.7^\circ$  ( $c = 0.56$ ,  $i$ PrOH); HPLC condition: chiralpak IA, 254 nm, 0.5 mL/min, n-hexane/ $i$ -PrOH = 70/30,  $t_{major} = 21.760$  min,  $t_{minor} = 11.022$  min,  $ee = 90\%$ ;  $^1\text{H}$  NMR (600 MHz,  $\text{CDCl}_3$ )  $\delta$  7.17 (d,  $J = 7.6$  Hz, 1H), 7.11 (d,  $J = 7.6$  Hz, 1H), 7.05–6.85 (m, 2H), 6.17–5.83 (m, 2H), 4.33–4.28 (m, 2H), 3.76–3.44 (m, 6H), 2.90–2.85 (m, 1H), 1.37–1.32 (m, 3H), 1.23 (d,  $J = 6.8$  Hz, 6H) ppm;  $^{13}\text{C}$  NMR (151 MHz,  $\text{CDCl}_3$ )  $\delta$  152.8, 149.5, 130.1, 126.4, 125.8, 125.0, 124.5, 123.0, 109.4, 109.1, 62.8, 53.0, 52.8, 52.4, 47.3 (d,  $J = 228.1$  Hz), 33.8, 23.8, 14.4 ppm; HRMS (ESI)  $m/z$ :  $[\text{M}+\text{Na}]^+$  Calcd for  $\text{C}_{18}\text{H}_{24}\text{N}_3\text{O}_5\text{PNa}^+$  416.1351; Found 416.1363.

#### Ethyl (R)-6-(tert-butyl)-1-(diazo(dimethoxyphosphoryl)methyl)isoquinoline-2(1H)-carboxylate (4n)

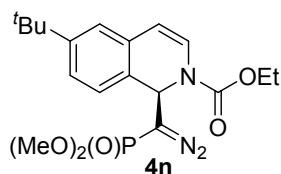

Yellow oil,  $[\alpha]_{25}^D = +22.1^\circ$  ( $c = 0.80$ ,  $i$ -PrOH); HPLC condition: chiralpak IA, 254 nm, 0.5 mL/min, n-hexane/ $i$ -PrOH = 70/30,  $t_{major} = 20.991$  min,  $t_{minor} = 10.496$  min,  $ee = 84\%$ ;  $^1\text{H}$  NMR (600 MHz,  $\text{CDCl}_3$ )  $\delta$  7.28 (d,  $J = 8.3$  Hz, 1H), 7.19 (d,  $J = 7.9$  Hz, 1H), 7.13 (s, 1H), 7.08–6.85 (m, 1H), 6.21–5.89 (m, 2H), 4.45–4.21 (m, 2H), 3.77–3.57 (m, 6H), 1.35–1.42 (m, 12H) ppm.  $^{13}\text{C}$  NMR (151 MHz,  $\text{CDCl}_3$ )  $\delta$  152.8, 151.8, 129.8, 126.2, 125.4, 124.7, 124.4, 121.8, 109.5, 109.3, 52.9, 52.7, 52.3, 47.3 (d,  $J = 229.1$  Hz), 34.6, 31.2, 14.4 ppm; HRMS (ESI)  $m/z$ :  $[\text{M}+\text{Na}]^+$  Calcd for  $\text{C}_{19}\text{H}_{26}\text{N}_3\text{O}_5\text{PNa}^+$  430.1508; Found 430.1514.

#### Ethyl (R)-1-(diazodimethoxyphosphoryl)methyl-7-methoxyisoquinoline-2(1H)-carboxylate (4o)

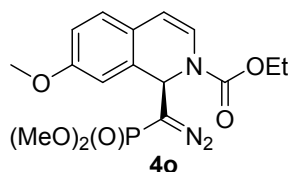

Yellow oil,  $[\alpha]_{25}^D = +80.3^\circ$  ( $c = 0.26$ ,  $i$ -PrOH); HPLC condition: chiralpak IA, 254 nm, 0.5 mL/min, n-hexane/ $i$ -PrOH = 70/30,  $t_{major} = 17.229$  min,  $t_{minor} = 13.901$  min,  $ee = 73\%$ ;  $^1\text{H}$  NMR (600 MHz,  $(\text{CD}_3)_2\text{CO}$ ) 7.16 (d,  $J = 8.4$  Hz, 1H), 7.02 (s, 1H), 6.95–6.83 (m, 2H), 6.20 (d,  $J = 7.6$  Hz, 1H), 5.95 (d,  $J = 34.5$  Hz, 1H), 4.35–4.22 (m, 2H), 3.83 (s, 3H), 3.78–3.68 (m, 3H), 3.57 (d,  $J = 11.8$  Hz, 3H), 1.33 (d,  $J = 17.4$  Hz, 3H) ppm.  $^{13}\text{C}$  NMR (151 MHz,  $(\text{CD}_3)_2\text{CO}$ )  $\delta$  160.4, 153.6, 130.6, 127.2, 123.8, 123.4, 115.5, 112.6, 109.5, 63.3, 55.9, 53.3, 53.1, 53.0, 47.7 (d,  $J = 225.4$  Hz), 14.7 ppm; HRMS (ESI)  $m/z$ :  $[\text{M}+\text{Na}]^+$  Calcd for  $\text{C}_{16}\text{H}_{20}\text{N}_3\text{O}_6\text{PNa}^+$  404.0982; Found 404.0983.

#### Ethyl (R)-7-bromo-1-(diazodimethoxyphosphoryl)methylisoquinoline-2(1H)-carboxylate (4p)

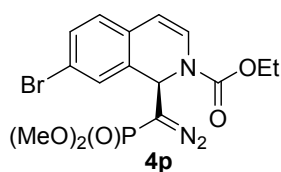

Yellow oil,  $[\alpha]_{25}^D = +98.4^\circ$  ( $c = 0.19$ ,  $i$ -PrOH); HPLC condition: chiralpak IA, 254 nm, 0.5 mL/min, n-hexane/ $i$ -PrOH = 70/30,  $t_{major} = 12.273$  min,  $t_{minor} = 13.385$  min,  $ee = 97\%$ ;  $^1\text{H}$  NMR (600 MHz,  $(\text{CD}_3)_2\text{CO}$ )  $\delta$  7.63 (s, 1H), 7.47 (d,  $J = 8.2$  Hz, 1H), 7.16 (d,  $J = 8.2$  Hz, 1H), 7.05 (s, 1H), 6.30 (d,  $J = 6.4$  Hz, 1H), 5.96 (d,  $J = 33.6$  Hz, 1H), 4.34–4.27 (m, 2H), 3.70 (d,  $J = 10.9$  Hz, 3H), 3.53 (d,  $J = 11.8$  Hz, 3H), 1.34 (s, 3H) ppm.  $^{13}\text{C}$  NMR (151 MHz,  $(\text{CD}_3)_2\text{CO}$ )  $\delta$  153.6, 132.4, 131.4, 130.5, 127.5, 126.8, 126.5, 120.7, 108.1, 63.7, 53.3, 53.0, 48.3 (d,  $J = 223.8$  Hz), 14.7 ppm; HRMS (ESI)  $m/z$ :  $[\text{M}+\text{Na}]^+$  Calcd for  $\text{C}_{15}\text{H}_{17}\text{BrN}_3\text{O}_5\text{PNa}^+$  451.9981; Found 451.9982.

#### Ethyl (R)-1-(1-diazo-2-ethoxy-2-oxoethyl)isoquinoline-2(1H)-carboxylate (6a)

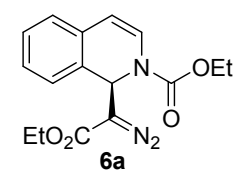

Yellow oil,  $[\alpha]_{25}^D = +164.3^\circ$  ( $c = 0.52$ , EA); HPLC condition: chiralpak IA, 254 nm, 0.5 mL/min, n-hexane/ $i$ -PrOH = 90/10,  $t_{major} = 15.992$  min,  $t_{minor} = 13.286$  min,  $ee = 98\%$ ;  $^1\text{H}$  NMR (600 MHz,  $\text{CDCl}_3$ )  $\delta$  7.25–7.21 (m, 3H), 7.13–6.31 (m, 3H), 5.81 (s, 1H), 4.37–4.13 (m, 4H), 1.34 (s, 3H), 1.23 (s, 3H) ppm.  $^{13}\text{C}$  NMR (151 MHz,  $\text{CDCl}_3$ )  $\delta$  164.8, 152.8, 130.1, 128.7, 128.4, 127.6, 126.3, 125.3, 124.9, 108.2, 62.8, 60.9, 51.3, 14.4 ppm; HRMS (ESI)  $m/z$ :  $[\text{M}+\text{Na}]^+$  Calcd for  $\text{C}_{16}\text{H}_{17}\text{N}_3\text{O}_4\text{Na}^+$  338.1117; Found 338.1118.

#### Ethyl (R)-1-(1-diazo-2-ethoxy-2-oxoethyl)-4-phenylisoquinoline-2(1H)-carboxylate (6b)

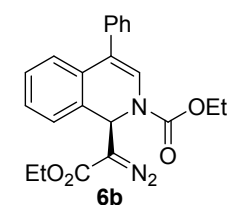

Yellow oil,  $[\alpha]_{25}^D = +242.5^\circ$  ( $c = 0.77$ , EA); HPLC condition: chiralpak IA, 254 nm, 0.5 mL/min, n-hexane/ $i$ -PrOH = 90/10,  $t_{major} = 13.381$  min,  $t_{minor} = 11.378$  min,  $ee = 98\%$ ;  $^1\text{H}$  NMR (600 MHz,  $\text{CDCl}_3$ )  $\delta$  7.43 (t,  $J = 7.4$  Hz, 2H), 7.40–7.33 (m, 4H), 7.29 (t,  $J = 7.4$  Hz, 1H), 7.24 (t,  $J = 7.5$  Hz, 1H), 7.17–6.91 (m, 2H), 6.54 (d,  $J = 48.2$  Hz, 1H), 4.35 (d,  $J = 6.0$  Hz, 2H), 4.25 (d,  $J = 6.9$  Hz, 2H), 1.37 (s, 3H), 1.27 (t,  $J = 7.1$  Hz, 3H) ppm;  $^{13}\text{C}$  NMR (151 MHz,  $\text{CDCl}_3$ )  $\delta$  164.8, 152.8, 136.8, 131.0, 129.3, 128.9, 128.8, 128.7, 128.6, 128.3, 128.0, 127.5, 126.3, 124.2, 123.7, 123.4, 122.2, 62.8, 61.0, 51.2, 14.4 ppm; HRMS (ESI)  $m/z$ :  $[\text{M}+\text{Na}]^+$  Calcd for  $\text{C}_{22}\text{H}_{21}\text{N}_3\text{O}_4\text{Na}^+$  414.1430; Found 414.1428.

#### Ethyl (R)-5-bromo-1-(1-diazo-2-ethoxy-2-oxoethyl)isoquinoline-2(1H)-carboxylate (6c)

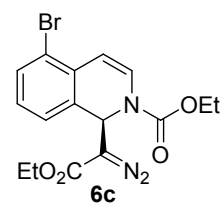

Yellow oil,  $[\alpha]_{25}^D = +161.2^\circ$  ( $c = 0.63$ , EA); HPLC condition: chiralpak IC, 254 nm, 0.5 mL/min, n-hexane/ $i$ -PrOH = 90/10,  $t_{major} = 21.258$  min,  $t_{minor} = 16.897$  min,  $ee = 98\%$ ;  $^1\text{H}$  NMR (600 MHz,  $\text{CDCl}_3$ )  $\delta$  7.47 (dd,  $J = 8.0, 0.7$  Hz, 1H), 7.19 (d,  $J = 5.3$  Hz, 1H), 7.15–6.95 (m, 2H), 6.41 (s, 1H), 6.16 (d,  $J = 5.5$  Hz, 1H), 4.37–4.26 (m, 2H), 4.19 (dd,  $J = 13.4, 6.5$  Hz, 2H), 1.34 (t,  $J = 7.1$  Hz, 3H), 1.23 (t,  $J = 7.1$  Hz, 3H) ppm;  $^{13}\text{C}$  NMR (151 MHz,  $\text{CDCl}_3$ )  $\delta$  164.7, 152.7, 132.5, 130.7, 129.8, 128.4, 126.6, 125.6, 120.3, 106.7, 63.1, 61.0, 51.3, 14.4 ppm; HRMS (ESI)  $m/z$ :  $[\text{M}+\text{Na}]^+$  Calcd for  $\text{C}_{16}\text{H}_{16}\text{BrN}_3\text{O}_4\text{Na}^+$  416.0222; Found 416.0223.

#### Ethyl (R)-5-chloro-1-(1-diazo-2-ethoxy-2-oxoethyl)isoquinoline-2(1H)-carboxylate (6d)

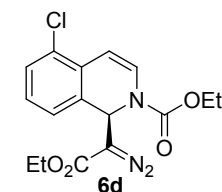

Yellow oil,  $[\alpha]_{25}^D = +156.9^\circ$  ( $c = 0.64$ , EA); HPLC condition: chiralpak IC, 254 nm, 0.5 mL/min, n-hexane/ $i$ -PrOH = 90/10,  $t_{major} = 19.826$  min,  $t_{minor} = 16.341$  min,  $ee = 98\%$ ;  $^1\text{H}$  NMR (600 MHz,  $\text{CDCl}_3$ )  $\delta$  7.28 (dd,  $J = 7.6, 1.4$  Hz, 1H), 7.18–6.97 (m, 3H), 6.41 (s, 1H), 6.18 (s, 1H), 4.36–4.27 (m, 2H), 4.20–4.17 (m, 2H), 1.34 (t,  $J = 7.1$  Hz, 3H), 1.22 (t,  $J = 7.1$  Hz,



3H) ppm;  $^{13}\text{C}$  NMR (151 MHz,  $\text{CDCl}_3$ )  $\delta$  164.7, 152.7, 130.6, 129.9, 129.2, 128.1, 128.1, 126.4, 124.9, 104.2, 63.0, 61.0, 51.2, 14.3 ppm. HRMS (ESI)  $m/z$ :  $[\text{M}+\text{Na}]^+$  Calcd for  $\text{C}_{16}\text{H}_{16}\text{ClN}_3\text{O}_4\text{Na}^+$  372.0727; Found 372.0725.

**Ethyl (R)-1-(1-diazo-2-ethoxy-2-oxoethyl)-5-nitroisoquinoline-2(1H)-carboxylate (6e)**

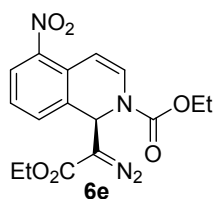

Yellow oil,  $[\alpha]_{25}^{\text{D}} = +83.4^\circ$  ( $c = 0.67$ , EA); HPLC condition: chiralpak IC, 254 nm, 0.5 mL/min, n-hexane/*i*-PrOH = 90/10,  $t_{\text{major}} = 24.060$  min,  $t_{\text{minor}} = 32.787$  min,  $ee = 96\%$ ;  $^1\text{H}$  NMR (600 MHz,  $\text{CDCl}_3$ )  $\delta$  7.93 (d,  $J = 8.1$  Hz, 1H), 7.51 (d,  $J = 6.7$  Hz, 1H), 7.31 (t,  $J = 7.9$  Hz, 1H), 7.17 (d,  $J = 7.7$  Hz, 1H), 6.56 (d,  $J = 7.1$  Hz, 1H), 6.46 (s, 1H), 4.38–4.28 (m, 2H), 4.19 (dd,  $J = 14.1, 7.0$  Hz, 2H), 1.35 (t,  $J = 7.1$  Hz, 3H), 1.23 (t,  $J = 7.1$  Hz, 3H) ppm;  $^{13}\text{C}$  NMR (151 MHz,  $\text{CDCl}_3$ )  $\delta$  164.5, 152.4, 144.4, 131.6, 131.4, 129.3, 127.2, 125.2, 125.0, 102.1, 63.5, 61.2, 51.2, 14.3 ppm; HRMS (ESI)  $m/z$ :  $[\text{M}+\text{Na}]^+$  Calcd for  $\text{C}_{16}\text{H}_{16}\text{N}_4\text{O}_6\text{Na}^+$  383.0968; Found 383.0965.

**Ethyl (R)-1-(1-diazo-2-ethoxy-2-oxoethyl)-5-methoxyisoquinoline-2(1H)-carboxylate (6f)**

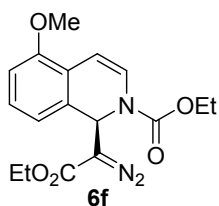

Yellow oil,  $[\alpha]_{25}^{\text{D}} = +103.1^\circ$  ( $c = 0.62$ , EA); HPLC condition: chiralpak IA, 254 nm, 0.5 mL/min, n-hexane/*i*-PrOH = 90/10,  $t_{\text{major}} = 17.381$  min,  $t_{\text{minor}} = 14.147$  min,  $ee = 99\%$ ;  $^1\text{H}$  NMR (600 MHz,  $\text{CDCl}_3$ )  $\delta$  7.17 (t,  $J = 7.9$  Hz, 1H), 7.01–6.85 (m, 2H), 6.77 (d,  $J = 8.2$  Hz, 1H), 6.39 (d,  $J = 53.2$  Hz, 1H), 6.18 (s, 1H), 4.35–4.25 (m, 2H), 4.24–4.14 (m, 2H), 3.84 (s, 3H), 1.39–1.29 (m, 3H), 1.24 (t,  $J = 7.1$  Hz, 3H) ppm;  $^{13}\text{C}$  NMR (151 MHz,  $\text{CDCl}_3$ )  $\delta$  164.9, 153.9, 129.9, 128.3, 127.9, 123.9, 119.5, 118.5, 109.9, 102.9, 62.7, 60.9, 55.6, 50.9, 14.4 ppm; HRMS (ESI)  $m/z$ :  $[\text{M}+\text{Na}]^+$  Calcd for  $\text{C}_{17}\text{H}_{19}\text{N}_3\text{O}_5\text{Na}^+$  368.1222; Found 368.1223.

**Ethyl (R)-1-(1-diazo-2-ethoxy-2-oxoethyl)-6-fluoroisoquinoline-2(1H)-carboxylate (6g)**

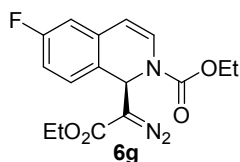

Yellow oil,  $[\alpha]_{25}^{\text{D}} = +73.1^\circ$  ( $c = 0.58$ , EA); HPLC condition: chiralpak IC, 254 nm, 0.5 mL/min, n-hexane/*i*-PrOH = 90/10,  $t_{\text{major}} = 18.172$  min,  $t_{\text{minor}} = 16.829$  min,  $ee = 97\%$ ;  $^1\text{H}$  NMR (600 MHz,  $\text{CDCl}_3$ )  $\delta$  7.21 (s, 1H), 7.14–6.93 (m, 1H), 6.90 (td,  $J = 8.5, 2.4$  Hz, 1H), 6.78 (dd,  $J = 9.1, 2.4$  Hz, 1H), 6.41 (s, 1H), 5.75 (s, 1H), 4.39–4.27 (m, 2H), 4.19 (dd,  $J = 13.5, 6.6$  Hz, 2H), 1.34 (t,  $J = 7.1$  Hz, 3H), 1.23 (t,  $J = 7.1$  Hz, 3H) ppm;  $^{13}\text{C}$  NMR (151 MHz,  $\text{CDCl}_3$ )  $\delta$  164.8, 162.6 (d,  $J = 246.4$  Hz), 152.9, 132.2 (d,  $J = 8.6$  Hz), 128.0 (d,  $J = 8.4$  Hz), 126.0, 124.5 (d,  $J = 2.8$  Hz), 114.3 (d,  $J = 22.3$  Hz), 111.3 (d,  $J = 22.5$  Hz), 107.3 (d,  $J = 2.1$  Hz), 63.0, 61.0, 51.0, 14.4 ppm; HRMS (ESI)  $m/z$ :  $[\text{M}+\text{Na}]^+$  Calcd for  $\text{C}_{16}\text{H}_{16}\text{FN}_3\text{O}_4\text{Na}^+$  356.1023; Found 356.1021.

**Ethyl (R)-6-chloro-1-(1-diazo-2-ethoxy-2-oxoethyl)isoquinoline-2(1H)-carboxylate (6h)**

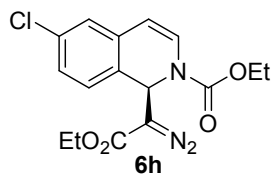

Yellow oil,  $[\alpha]_{25}^{\text{D}} = +85.1^\circ$  ( $c = 0.64$ , EA); HPLC condition: chiralpak IC, 254 nm, 0.5 mL/min, n-hexane/*i*-PrOH = 90/10,  $t_{\text{major}} = 18.533$  min,  $t_{\text{minor}} = 17.139$  min,  $ee = 97\%$ ;  $^1\text{H}$  NMR (600 MHz,  $\text{CDCl}_3$ )  $\delta$  7.17 (s, 2H), 7.12–6.91 (m, 2H), 6.39 (s, 1H), 5.73 (s, 1H), 4.37–4.25 (m, 2H), 4.21–4.17 (m, 2H), 1.34 (t,  $J = 7.1$  Hz, 3H), 1.23 (t,  $J = 7.1$  Hz, 3H) ppm;  $^{13}\text{C}$  NMR (151 MHz,  $\text{CDCl}_3$ )  $\delta$  164.7, 152.8, 134.2, 131.8, 127.6, 127.4, 127.0, 126.1, 124.6, 106.9, 63.0, 61.0, 51.0, 14.4 ppm; HRMS (ESI)  $m/z$ :  $[\text{M}+\text{Na}]^+$  Calcd for  $\text{C}_{16}\text{H}_{16}\text{ClN}_3\text{O}_4\text{Na}^+$  372.0727; Found 372.0726.

**Ethyl (R)-6-bromo-1-(1-diazo-2-ethoxy-2-oxoethyl)isoquinoline-2(1H)-carboxylate (6i)**

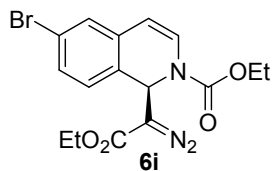

Yellow oil,  $[\alpha]_{25}^{\text{D}} = +80.6^\circ$  ( $c = 0.69$ , EA); HPLC condition: chiralpak IC, 254 nm, 0.5 mL/min, n-hexane/*i*-PrOH = 90/10,  $t_{\text{major}} = 18.870$  min,  $t_{\text{minor}} = 17.596$  min,  $ee = 98\%$ ;  $^1\text{H}$  NMR (600 MHz,  $\text{CDCl}_3$ )  $\delta$  7.33 (d,  $J = 8.1$  Hz, 1H), 7.23 (s, 1H), 7.12–6.97 (m, 2H), 6.36 (d,  $J = 25.7$  Hz, 1H), 5.73 (s, 1H), 4.39–4.26 (m, 2H), 4.26–4.15 (m, 2H), 1.34 (t,  $J = 6.9$  Hz, 3H), 1.24 (t,  $J = 6.6$  Hz, 3H) ppm;  $^{13}\text{C}$  NMR (151 MHz,  $\text{CDCl}_3$ )  $\delta$  164.6, 152.7, 132.1, 130.3, 127.9, 127.5, 127.5, 126.1, 122.2, 106.7, 63.0, 61.0, 51.1, 14.4 ppm; HRMS (ESI)  $m/z$ :  $[\text{M}+\text{Na}]^+$  Calcd for  $\text{C}_{16}\text{H}_{16}\text{BrN}_3\text{O}_4\text{Na}^+$  416.0222; Found 416.0223.

**Ethyl (R)-1-(1-diazo-2-ethoxy-2-oxoethyl)-6-methylisoquinoline-2(1H)-carboxylate (6j)**

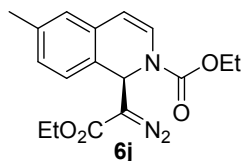

Yellow oil,  $[\alpha]_{25}^{\text{D}} = +55.0^\circ$  ( $c = 0.47$ , EA); HPLC condition: chiralpak IC, 254 nm, 0.5 mL/min, n-hexane/*i*-PrOH = 90/10,  $t_{\text{major}} = 25.037$  min,  $t_{\text{minor}} = 23.242$  min,  $ee = 98\%$ ;  $^1\text{H}$  NMR (600 MHz,  $\text{CDCl}_3$ )  $\delta$  7.13 (s, 1H), 7.07–6.86 (m, 3H), 6.38 (d,  $J = 43.8$  Hz, 1H), 5.77 (s, 1H), 4.33–4.24 (m, 2H), 4.20 (s, 2H), 2.32 (s, 3H), 1.33 (s, 3H), 1.24 (t,  $J = 6.7$  Hz, 3H) ppm;  $^{13}\text{C}$  NMR (151 MHz,  $\text{CDCl}_3$ )  $\delta$  164.9, 152.9, 138.2, 129.9, 128.4, 126.2, 126.0, 125.5, 124.7, 108.3, 62.8, 60.9, 51.2, 21.1, 14.4 ppm; HRMS (ESI)  $m/z$ :  $[\text{M}+\text{Na}]^+$  Calcd for  $\text{C}_{17}\text{H}_{19}\text{N}_3\text{O}_4\text{Na}^+$  352.1273; Found 352.1270.

**Ethyl (R)-1-(1-diazo-2-ethoxy-2-oxoethyl)-6-ethylisoquinoline-2(1H)-carboxylate (6k)**

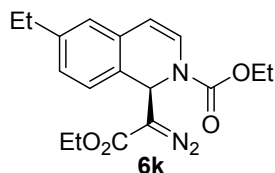

Yellow oil,  $[\alpha]_{25}^D = +104.8^\circ$  ( $c = 0.67$ , EA); HPLC condition: chiralpak IA, 254 nm, 0.5 mL/min, n-hexane/*i*-PrOH = 90/10,  $t_{major} = 17.727$  min,  $t_{minor} = 13.646$  min,  $ee = 98\%$ ;  $^1\text{H}$  NMR (600 MHz,  $\text{CDCl}_3$ )  $\delta$  7.16 (s, 1H), 7.06–6.90 (m, 3H), 6.39 (d,  $J = 45.1$  Hz, 1H), 5.79 (s, 1H), 4.35–4.26 (m, 2H), 4.24–4.15 (m, 2H), 2.62 (q,  $J = 7.6$  Hz, 2H), 1.34 (d,  $J = 5.8$  Hz, 3H), 1.23 (dd,  $J = 14.3, 6.8$  Hz, 6H) ppm;  $^{13}\text{C}$  NMR (151 MHz,  $\text{CDCl}_3$ )  $\delta$  164.9, 152.9, 144.6, 130.0, 127.2, 126.2, 126.2, 125.2, 124.8, 124.3, 108.5, 62.8, 60.9, 51.1, 28.5, 15.3, 14.4 ppm; HRMS (ESI)  $m/z$ :  $[\text{M}+\text{Na}]^+$

Calcd for  $\text{C}_{18}\text{H}_{21}\text{N}_3\text{O}_4\text{Na}^+$  366.1430; Found 366.1431.

#### Ethyl (R)-1-(1-diazo-2-ethoxy-2-oxoethyl)-6-isopropylisoquinoline-2(1H)-carboxylate (6l)

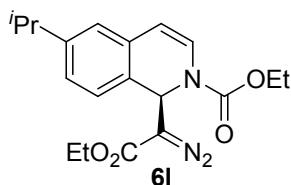

Yellow oil,  $[\alpha]_{25}^D = +82.8^\circ$  ( $c = 0.56$ , EA); HPLC condition: chiralpak IA, 254 nm, 0.5 mL/min, n-hexane/*i*-PrOH = 90/10,  $t_{major} = 17.267$  min,  $t_{minor} = 13.358$  min,  $ee = 97\%$ ;  $^1\text{H}$  NMR (600 MHz,  $\text{CDCl}_3$ )  $\delta$  7.17 (s, 1H), 7.09 (dd,  $J = 7.8, 1.4$  Hz, 1H), 7.06–6.86 (m, 2H), 6.39 (d,  $J = 42.0$  Hz, 1H), 5.79 (s, 1H), 4.33–4.28 (m, 2H), 4.25–4.14 (m, 2H), 2.93–2.81 (m, 1H), 1.33 (t,  $J = 6.5$  Hz, 3H), 1.23 (t,  $J = 5.8$  Hz, 9H) ppm;  $^{13}\text{C}$  NMR (151 MHz,  $\text{CDCl}_3$ )  $\delta$  164.9, 152.8, 149.2, 129.9, 126.3, 126.2, 125.8, 125.4, 124.8, 122.9, 108.5, 62.7, 60.8, 51.1, 33.8, 23.8, 14.4 ppm;

HRMS (ESI)  $m/z$ :  $[\text{M}+\text{Na}]^+$  Calcd for  $\text{C}_{19}\text{H}_{23}\text{N}_3\text{O}_4\text{Na}^+$  380.1586; Found 380.1587.

#### Ethyl (R)-6-(tert-butyl)-1-(1-diazo-2-ethoxy-2-oxoethyl)isoquinoline-2(1H)-carboxylate (6m)

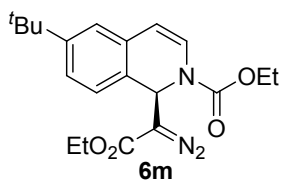

Yellow oil,  $[\alpha]_{25}^D = +96.4^\circ$  ( $c = 0.56$ , EA); HPLC condition: chiralpak IA, 254 nm, 0.5 mL/min, n-hexane/*i*-PrOH = 90/10,  $t_{major} = 17.314$  min,  $t_{minor} = 12.137$  min,  $ee = 95\%$ ;  $^1\text{H}$  NMR (600 MHz,  $\text{CDCl}_3$ )  $\delta$  7.26–7.24 (m, 1H), 7.19 (s, 1H), 7.13–6.85 (m, 2H), 6.39 (d,  $J = 45.1$  Hz, 1H), 5.81 (s, 1H), 4.35–4.25 (m, 2H), 4.25–4.15 (m, 2H), 1.31 (s, 9H), 1.24 (t,  $J = 7.1$  Hz, 3H) ppm;  $^{13}\text{C}$  NMR (151 MHz,  $\text{CDCl}_3$ )  $\delta$  164.9, 152.8, 151.5, 129.6, 126.0, 126.0, 125.1, 124.8, 124.6, 121.8, 108.8, 62.7, 60.8, 51.0, 34.6, 31.2, 14.4 ppm; HRMS (ESI)  $m/z$ :  $[\text{M}+\text{Na}]^+$  Calcd for  $\text{C}_{20}\text{H}_{25}\text{N}_3\text{O}_4\text{Na}^+$  394.1743; Found 394.1740.

#### Ethyl (R)-1-(1-diazo-2-ethoxy-2-oxoethyl)-6-methoxyisoquinoline-2(1H)-carboxylate (6n)

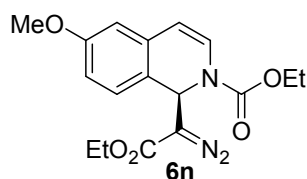

Yellow oil,  $[\alpha]_{25}^D = +68.2^\circ$  ( $c = 0.28$ , EA); HPLC condition: chiralpak IA, 254 nm, 0.5 mL/min, n-hexane/*i*-PrOH = 90/10,  $t_{major} = 25.037$  min,  $t_{minor} = 14.508$  min,  $ee = 97\%$ ;  $^1\text{H}$  NMR (600 MHz,  $\text{CDCl}_3$ )  $\delta$  7.17–6.93 (m, 2H), 6.77 (dd,  $J = 8.4, 2.6$  Hz, 1H), 6.61 (d,  $J = 2.5$  Hz, 1H), 6.37 (d,  $J = 36.1$  Hz, 1H), 5.77 (s, 1H), 4.35–4.25 (m, 2H), 4.25–4.14 (m, 2H), 3.80 (s, 3H), 1.34 (t,  $J = 6.9$  Hz, 3H), 1.24 (t,  $J = 7.1$  Hz, 3H). ppm;  $^{13}\text{C}$  NMR (151 MHz,  $\text{CDCl}_3$ )  $\delta$  159.6, 131.4, 127.4, 125.3, 121.2, 113.5, 109.7, 108.2, 62.8, 60.9, 55.3, 51.1, 14.4 ppm; HRMS (ESI)

$m/z$ :  $[\text{M}+\text{Na}]^+$  Calcd for  $\text{C}_{17}\text{H}_{19}\text{N}_3\text{O}_5\text{Na}^+$  368.1222; Found 368.1226.

#### Ethyl (R)-1-(1-diazo-2-methoxy-2-oxoethyl)isoquinoline-2(1H)-carboxylate (6o)

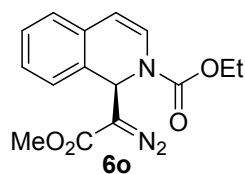

Yellow oil,  $[\alpha]_{25}^D = +142.6^\circ$  ( $c = 0.59$ , EA); HPLC condition: chiralpak IA, 254 nm, 0.5 mL/min, n-hexane/*i*-PrOH = 90/10,  $t_{major} = 16.943$  min,  $t_{minor} = 14.009$  min,  $ee = 95\%$ ;  $^1\text{H}$  NMR (600 MHz,  $\text{CDCl}_3$ )  $\delta$  7.26–7.18 (m, 3H), 7.09–6.92 (m, 2H), 6.45–6.39 (m, 1H), 5.81 (s, 1H), 4.37–4.24 (m, 2H), 3.74 (s, 3H), 1.34 (t,  $J = 6.6$  Hz, 3H) ppm;  $^{13}\text{C}$  NMR (151 MHz,  $\text{CDCl}_3$ )  $\delta$  165.2, 152.8, 130.0, 128.6, 128.5, 127.6, 126.3, 124.9, 108.2, 62.8, 51.9, 51.2, 14.4 ppm; HRMS (ESI)  $m/z$ :  $[\text{M}+\text{Na}]^+$  Calcd for  $\text{C}_{15}\text{H}_{15}\text{N}_3\text{O}_4\text{Na}^+$  324.0960; Found 324.1215.

#### Ethyl (R)-1-(1-diazo-2-isopropoxy-2-oxoethyl)isoquinoline-2(1H)-carboxylate (6p)

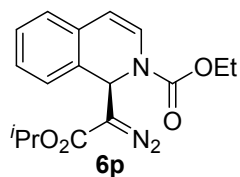

Yellow oil,  $[\alpha]_{25}^D = +145.0^\circ$  ( $c = 0.61$ , EA); HPLC condition: chiralpak IA, 254 nm, 0.5 mL/min, n-hexane/*i*-PrOH = 90/10,  $t_{major} = 14.290$  min,  $t_{minor} = 12.163$  min,  $ee = 98\%$ ;  $^1\text{H}$  NMR (600 MHz,  $\text{CDCl}_3$ )  $\delta$  7.33–7.26 (m, 3H), 7.15–6.97 (m, 2H), 6.50–6.44 (m, 1H), 5.87 (s, 1H), 5.13 (dt,  $J = 12.4, 6.2$  Hz, 1H), 4.44–4.29 (m, 2H), 1.40 (s, 3H), 1.30 (d,  $J = 6.0$  Hz, 3H), 1.24 (d,  $J = 6.1$  Hz, 3H) ppm;  $^{13}\text{C}$  NMR (151 MHz,  $\text{CDCl}_3$ )  $\delta$  164.5, 152.9, 130.2, 128.9, 128.4, 127.6, 126.3, 125.3, 124.9, 108.3, 68.6, 62.8, 51.4, 22.0, 21.9, 14.4 ppm; HRMS (ESI)  $m/z$ :  $[\text{M}+\text{Na}]^+$  Calcd for  $\text{C}_{17}\text{H}_{19}\text{N}_3\text{O}_4\text{Na}^+$  352.1273;

Found 352.1275.

#### Ethyl (R)-1-(2-(tert-butoxy)-1-diazo-2-oxoethyl)isoquinoline-2(1H)-carboxylate (6q)

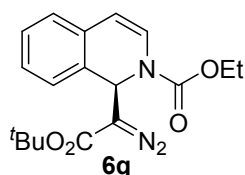

Yellow oil,  $[\alpha]_{25}^D = +133.3^\circ$  ( $c = 0.62$ , EA); HPLC condition: chiralpak IC, 254 nm, 0.5 mL/min, n-hexane/*i*-PrOH = 90/10,  $t_{major} = 12.094$  min,  $t_{minor} = 12.550$  min,  $ee = 98\%$ ;  $^1\text{H}$  NMR (600 MHz,  $\text{CDCl}_3$ )  $\delta$  7.27–7.18 (m, 3H), 7.08–6.92 (m,

2H), 6.39–6.33 (m, 1H), 5.79 (d,  $J = 7.4$  Hz, 1H), 4.38–4.22 (m, 2H), 1.45 (s, 9H), 1.34 (s, 3H) ppm;  $^{13}\text{C}$  NMR (151 MHz,  $\text{CDCl}_3$ )  $\delta$  164.1, 152.7, 130.0, 129.1, 128.3, 127.6, 126.2, 125.2, 124.9, 108.2, 81.7, 62.8, 51.3, 28.3, 14.4 ppm; HRMS (ESI)  $m/z$ :  $[\text{M}+\text{Na}]^+$  Calcd for  $\text{C}_{18}\text{H}_{21}\text{N}_3\text{O}_4\text{Na}^+$  366.1430; Found 366.1431.

## 7. Gram-scale reaction to obtain product 4d.

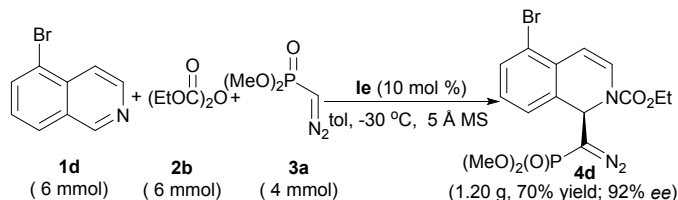

To evaluate its potential synthetic utility, the reaction was also performed on a larger scale (4 mmol), affording  $\alpha$ -diazo- $\beta$ -isoquinoline-phosphonate **4d** in 70% yield with enantioselectivity (92% ee) similar to that obtained in the 0.1-mmol-scale reaction with 10 mol % catalyst

## 8. Synthesis of 7a, 8a and 9c from 4a and 7c

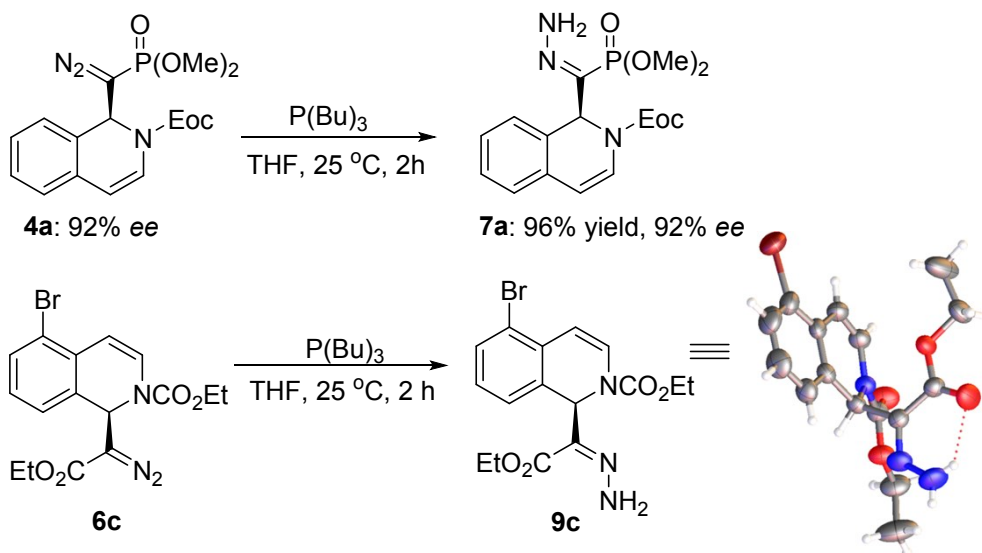

$\text{P(Bu)}_3$  (68  $\mu\text{L}$ , 0.3 mmol) was added to the solution of **4a** (35.1 mg, 0.1 mmol) in THF (2.0 mL) under nitrogen atmosphere and stirred at rt. The reaction mixture was stirred overnight at the same temperature until **4a** had been completely consumed by TLC, then, the mixture was purified directly by flash chromatography on silica gel (30–50%  $\text{AcOEt}$ /petroleum ether) to give the corresponding product **7a** (33.9 mg, 96% yield, 92% ee). **9c** was prepared according to the procedure of **7a**

### Ethyl (S, Z)-1-((dimethoxyphosphoryl)(hydrazono)methyl)isoquinoline-2(1H)-carboxylate (7a)

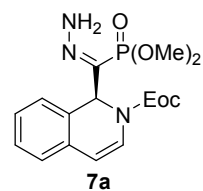

Colourless oil,  $[\alpha]_{25}^D = +14.6^\circ$  ( $c = 0.37$ ,  $i\text{-PrOH}$ ); HPLC condition: chiralpak IA, 254 nm, 0.5 mL/min, n-hexane/ $i\text{-PrOH}$  = 70/30,  $t_{\text{major}} = 16.348$  min,  $t_{\text{minor}} = 13.699$  min, ee = 92%;  $^1\text{H}$  NMR (600 MHz,  $\text{CDCl}_3$ )  $\delta$  7.61 (s, 2H), 7.26–7.09 (m, 3H), 7.08–6.88 (m, 2H), 6.16–6.08 (m, 1H), 5.73 (d,  $J = 20.0$  Hz, 1H), 4.26 (dd,  $J = 6.8, 2.7$  Hz, 2H), 3.45 (dd,  $J = 101.9, 10.5$  Hz, 6H), 1.31 (t,  $J = 7.0$  Hz, 3H) ppm;  $^{13}\text{C}$  NMR (151 MHz,  $\text{CDCl}_3$ )  $\delta$  153.0, 130.8, 129.5, 127.9, 127.4, 126.5, 125.8, 124.6, 106.8, 62.4, 60.9, 59.8, 58.5, 52.0 (d,  $J = 4.7$  Hz), 14.5 ppm; HRMS (ESI)  $m/z$ :  $[\text{M}+\text{Na}]^+$  Calcd for  $\text{C}_{15}\text{H}_{20}\text{N}_3\text{O}_5\text{PNa}^+$  376.1038; Found

376.10387.

**Ethyl (R, Z)-5-bromo-1-(2-ethoxy-1-hydrazono-2-oxoethyl)isoquinoline-2(1H)-carboxylate (9c)**

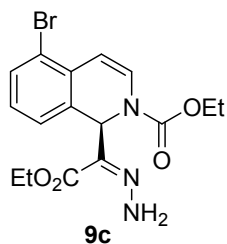

White solid, mp 90.5–92.1 °C,  $[\alpha]_{25}^D = +893.9^\circ$  ( $c = 0.23$ ,  $i\text{-PrOH}$ ); HPLC condition: chiralpak IA, 254 nm, 0.5 mL/min, n-hexane/ $i\text{-PrOH}$  = 70/30,  $t_{\text{major}} = 12.439$  min,  $t_{\text{minor}} = 9.891$  min,  $ee = 99\%$ ;  $^1\text{H}$  NMR (600 MHz,  $(\text{CD}_3)_2\text{CO}$ )  $\delta$  8.95 (s, 2H), 7.43 (d,  $J = 7.9$  Hz, 1H), 7.31 (s, 1H), 7.12 (s, 1H), 7.04 (t,  $J = 7.6$  Hz, 1H), 6.38 (s, 1H), 5.99 (d,  $J = 7.9$  Hz, 1H), 4.36–4.27 (m, 2H), 4.25–4.18 (m, 2H), 1.38 (t,  $J = 7.1$  Hz, 3H), 1.27 (s, 3H) ppm;  $^{13}\text{C}$  NMR (151 MHz,  $(\text{CD}_3)_2\text{CO}$ )  $\delta$  162.3, 132.4, 131.0, 129.6, 128.5, 127.1, 120.5, 104.8, 63.1, 61.1, 56.3, 14.7, 14.6 ppm; HRMS (ESI)  $m/z$ :  $[\text{M}+\text{Na}]^+$  Calcd for  $\text{C}_{16}\text{H}_{18}\text{BrN}_3\text{O}_4\text{Na}^+$  418.0373; Found 418.0371.

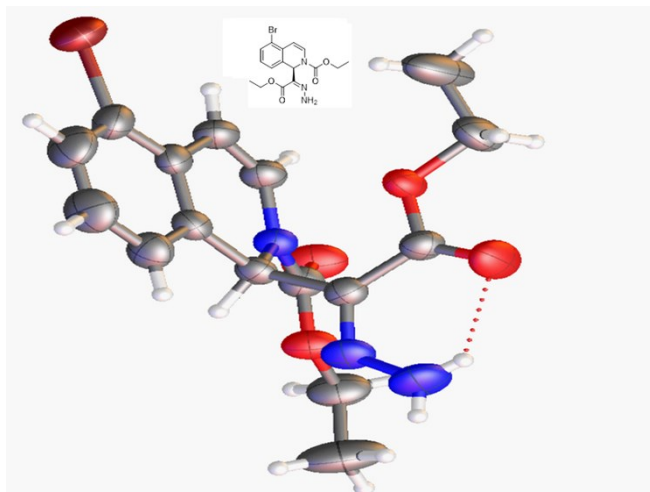

**Table S11.** Crystal data and structure refinement for **9c**

|                                               |                                                                  |
|-----------------------------------------------|------------------------------------------------------------------|
| Empirical formula                             | $\text{C}_{16}\text{H}_{18}\text{BrN}_3\text{O}_4$               |
| Formula weight                                | 396.24                                                           |
| Temperature/K                                 | 294.0(3)                                                         |
| Crystal system                                | monoclinic                                                       |
| Space group                                   | $P2_1$                                                           |
| $a/\text{\AA}$                                | 7.32373(10)                                                      |
| $b/\text{\AA}$                                | 15.62333(14)                                                     |
| $c/\text{\AA}$                                | 8.25080(10)                                                      |
| $\alpha/^\circ$                               | 90                                                               |
| $\beta/^\circ$                                | 112.6346(15)                                                     |
| $\gamma/^\circ$                               | 90                                                               |
| Volume/ $\text{\AA}^3$                        | 871.35(2)                                                        |
| $Z$                                           | 2                                                                |
| $\rho_{\text{calc}}/\text{g cm}^{-3}$         | 1.510                                                            |
| $\mu/\text{mm}^{-1}$                          | 3.440                                                            |
| $F(000)$                                      | 404.0                                                            |
| Crystal size/ $\text{mm}^3$                   | $0.2 \times 0.2 \times 0.2$                                      |
| Radiation                                     | $\text{CuK}\alpha$ ( $\lambda = 1.54184$ )                       |
| $2\theta$ range for data collection/ $^\circ$ | 11.328 to 143.384                                                |
| Index ranges                                  | $-8 \leq h \leq 8$ , $-18 \leq k \leq 19$ , $-9 \leq l \leq 10$  |
| Reflections collected                         | 9511                                                             |
| Independent reflections                       | 3335 [ $R_{\text{int}} = 0.0177$ , $R_{\text{sigma}} = 0.0158$ ] |

|                                             |                                  |
|---------------------------------------------|----------------------------------|
| Data/restraints/parameters                  | 3335/2/227                       |
| Goodness-of-fit on F <sup>2</sup>           | 1.041                            |
| Final R indexes [ $I \geq 2\sigma(I)$ ]     | $R_1 = 0.0383$ , $wR_2 = 0.1058$ |
| Final R indexes [all data]                  | $R_1 = 0.0386$ , $wR_2 = 0.1063$ |
| Largest diff. peak/hole / e Å <sup>-3</sup> | 0.43/-0.67                       |

**Table S12.** Optimization of the reaction conditions from **4a** to **8a**<sup>a</sup>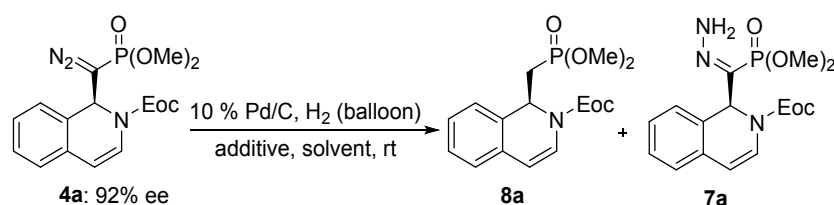

| entry | solvent/0.04M | additive/equiv.         | t (h) | Pd/C (%) | yield of <b>7a</b> (%) <sup>b</sup> | yield of <b>8a</b> (%) <sup>b</sup> |
|-------|---------------|-------------------------|-------|----------|-------------------------------------|-------------------------------------|
| 1     | MeOH          | --                      | 24    | 5        | --                                  | confusion                           |
| 2     | EA            | --                      | 24    | 5        | --                                  | confusion                           |
| 3     | MeOH          | DBU (1.0)               | 12    | 5        | 80                                  | trace                               |
| 4     | MeOH          | DBU (1.0)               | 12    | 1        | --                                  | 31                                  |
| 5     | EA            | DBU (1.0)               | 12    | 1        | 0                                   | 0                                   |
| 6     | MeOH/EA= 1/4  | DBU (1.0)               | 12    | 1        | 22                                  | 49                                  |
| 7     | MeOH/EA= 1/4  | DBU (0.5)               | 12    | 1        | 16                                  | 55                                  |
| 8     | MeOH/EA= 1/9  | DBU (1.0)               | 12    | 1        | 37                                  | 53                                  |
| 9     | MeOH/EA= 1/4  | Et <sub>3</sub> N (0.5) | 48    | 1        | trace                               | trace                               |
| 10    | MeOH/EA= 1/4  | DBN (1.0)               | 48    | 1        | 20                                  | 49                                  |
| 14    | MeOH/EA= 1/4  | DBU (0.5)               | 48    | 1        | 12                                  | 70                                  |
| 15    | MeOH/EA= 1/4  | DBU (0.2)               | 60    | 1        | trace                               | 82                                  |

<sup>a</sup>Unless noted otherwise, all reactions were conducted using **4a** (0.1 mmol), 10% Pd/C at rt under 1 atm of H<sub>2</sub> (balloon). <sup>b</sup>Isolated yield.

10% Pd/C (1.06 mg, 1 mol %) was added to the solution of **4a** (35.3 mg, 0.1 mmol) in EA:MeOH = 4:1 (2.5 mL). The reaction vessel was purged with H<sub>2</sub> (3 times), DBU (3.0  $\mu$ L, 0.02 mmol) was added to the mixture then stirred under 1 atm of H<sub>2</sub> (balloon). After the reaction completed, filtrated through a plug of celite, then the filtrate was concentrated under vacuum, the residue was purified by flash chromatography on silica gel (50–100% AcOEt/petroleum ether) to give the title compound **8a** in 82% yield (26.6 mg, 92% ee).

**Ethyl (S)-1-((dimethoxyphosphoryl)methyl)isoquinoline-2(1H)-carboxylate (**8a**)**

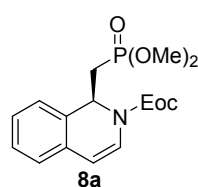

Colourless oil,  $[\alpha]_{25}^D = +597.0^\circ$  ( $c = 0.20$ , i-PrOH); HPLC condition: chiralpak IC, 230 nm, 1.0 mL/min, n-hexane/i-PrOH = 70/30,  $t_{\text{major}} = 29.220$  min,  $t_{\text{minor}} = 39.308$  min, ee = 92%; <sup>1</sup>H NMR (600 MHz, (CD<sub>3</sub>)<sub>2</sub>CO)  $\delta$  7.33–7.30 (m, 1H), 7.26–7.20 (m, 2H), 7.15 (d,  $J = 7.3$  Hz, 1H), 6.92–6.85 (m, 1H), 6.08–6.00 (m, 1H), 5.74 (dd,  $J = 14.9, 7.5$  Hz, 1H), 4.24 (d,  $J = 5.6$  Hz, 2H), 3.59 (t,  $J = 13.8$  Hz, 3H), 3.52 (d,  $J = 10.6$  Hz, 3H), 2.24–2.06 (m, 2H), 1.39–1.26 (m, 3H) ppm; <sup>13</sup>C NMR (151 MHz, (CD<sub>3</sub>)<sub>2</sub>CO)  $\delta$  153.1, 131.2, 128.9, 127.7, 127.6, 127.4, 125.5, 125.3, 109.7, 109.5, 63.0, 52.3, 51.4, 29.9 (d,  $J = 175.9$  Hz),

14.8 ppm; HRMS (ESI) m/z: [M+Na]<sup>+</sup> Calcd for C<sub>15</sub>H<sub>20</sub>NO<sub>5</sub>PNa<sup>+</sup> 348.0971; Found 348.0971.

## 9. References

[1] a) F. X. Xu, D. Huang, C. Han, W. Shen, X. F. Lin, Y. G. Wang, *J. Org. Chem.* **2010**, *75*, 8677; b) B. Zheng, H. H. Chen, L. Zhu, X. Q. Hou, Y. Wang, Y. Lan, Y. G. Peng, *Org. Lett.* **2019**, *21*, 593. c) B. Xu, S. F. Zhu, X. L. Xie, J. J. Shen, Q. L. Zhou, *Angew. Chem. Int. Ed.* **2011**, *50*, 11483. d) Y. X. Jia, J. Zhong, S. F. Zhu, C. M. Zhang, Q. L. Zhou, *Angew. Chem. Int. Ed.* **2007**, *46*, 5565.

## 10. NMR spectra and HPLC for SPAs and asymmetric acyl-Mannich reaction products.

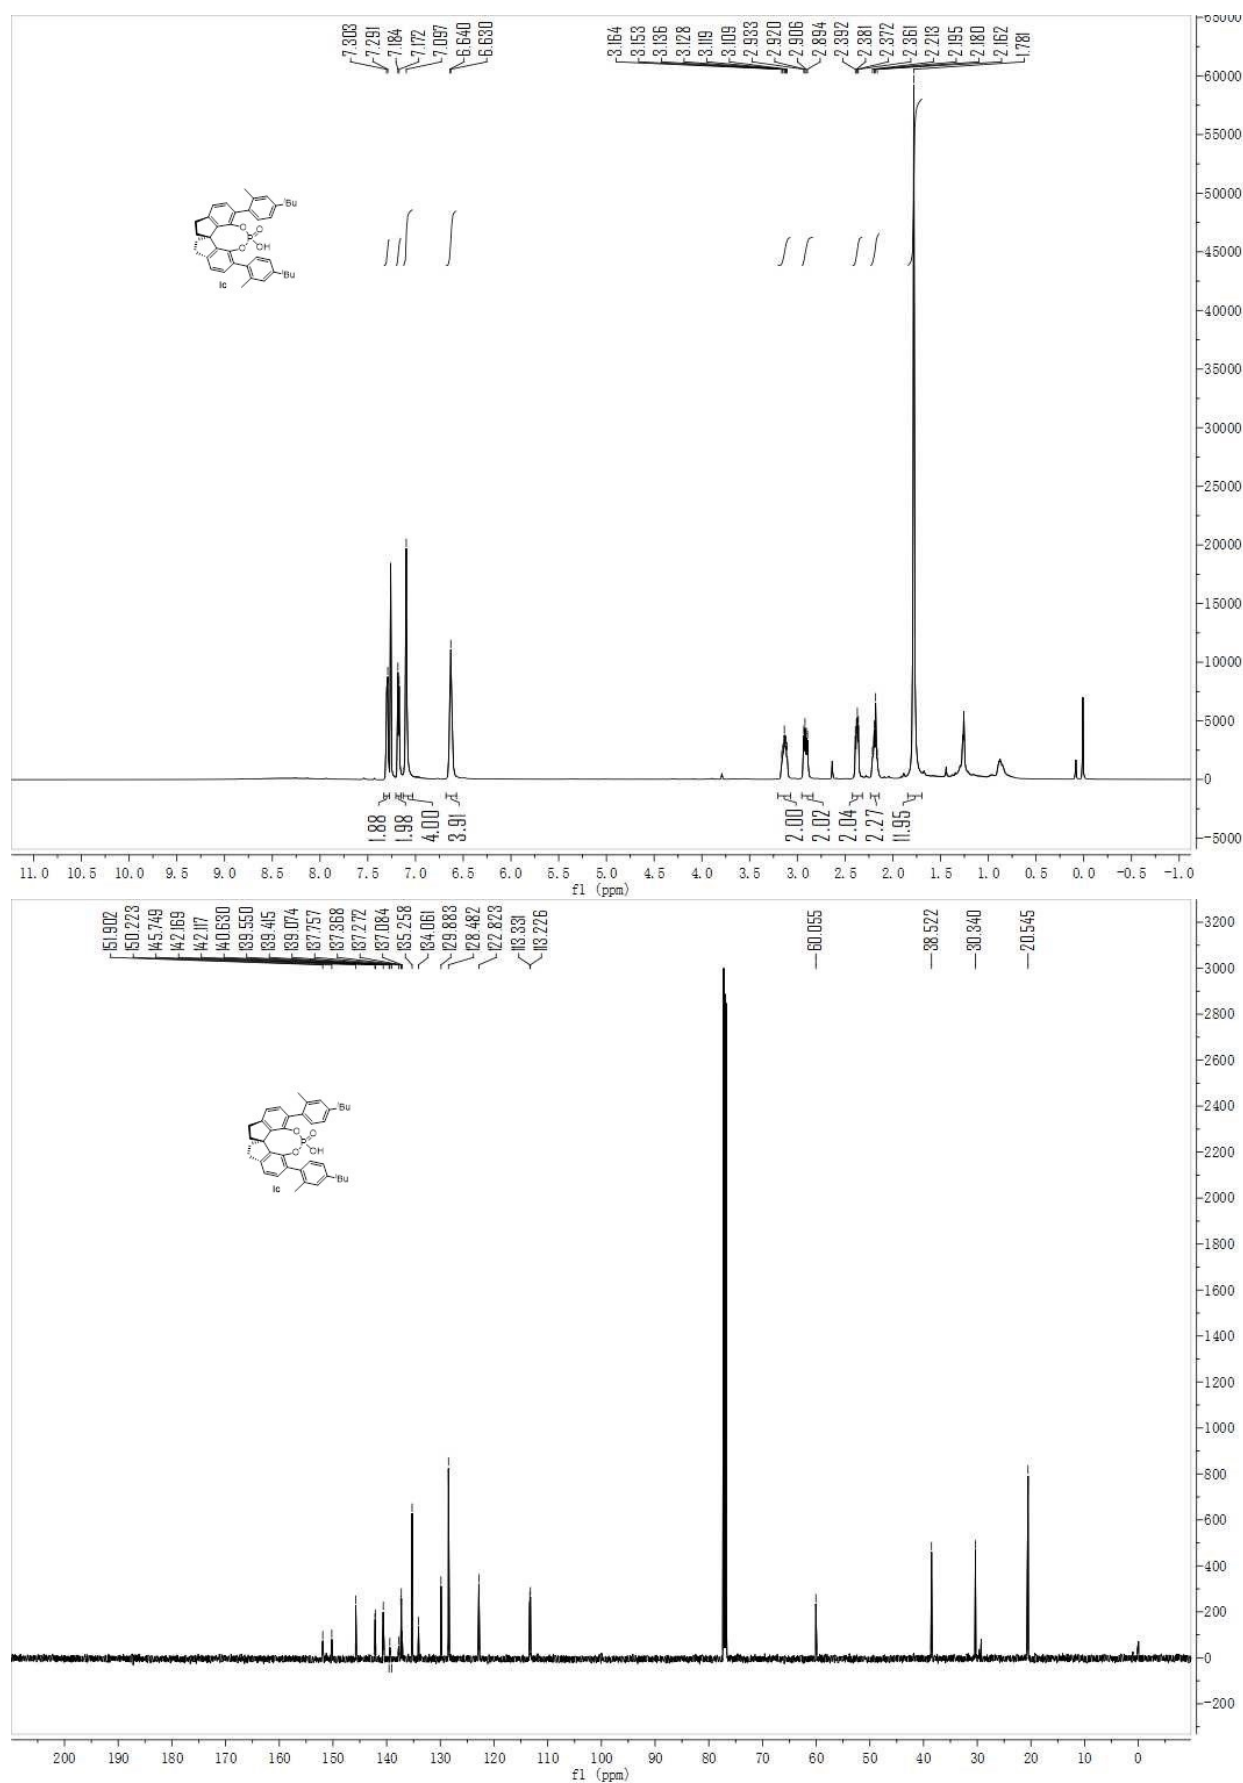

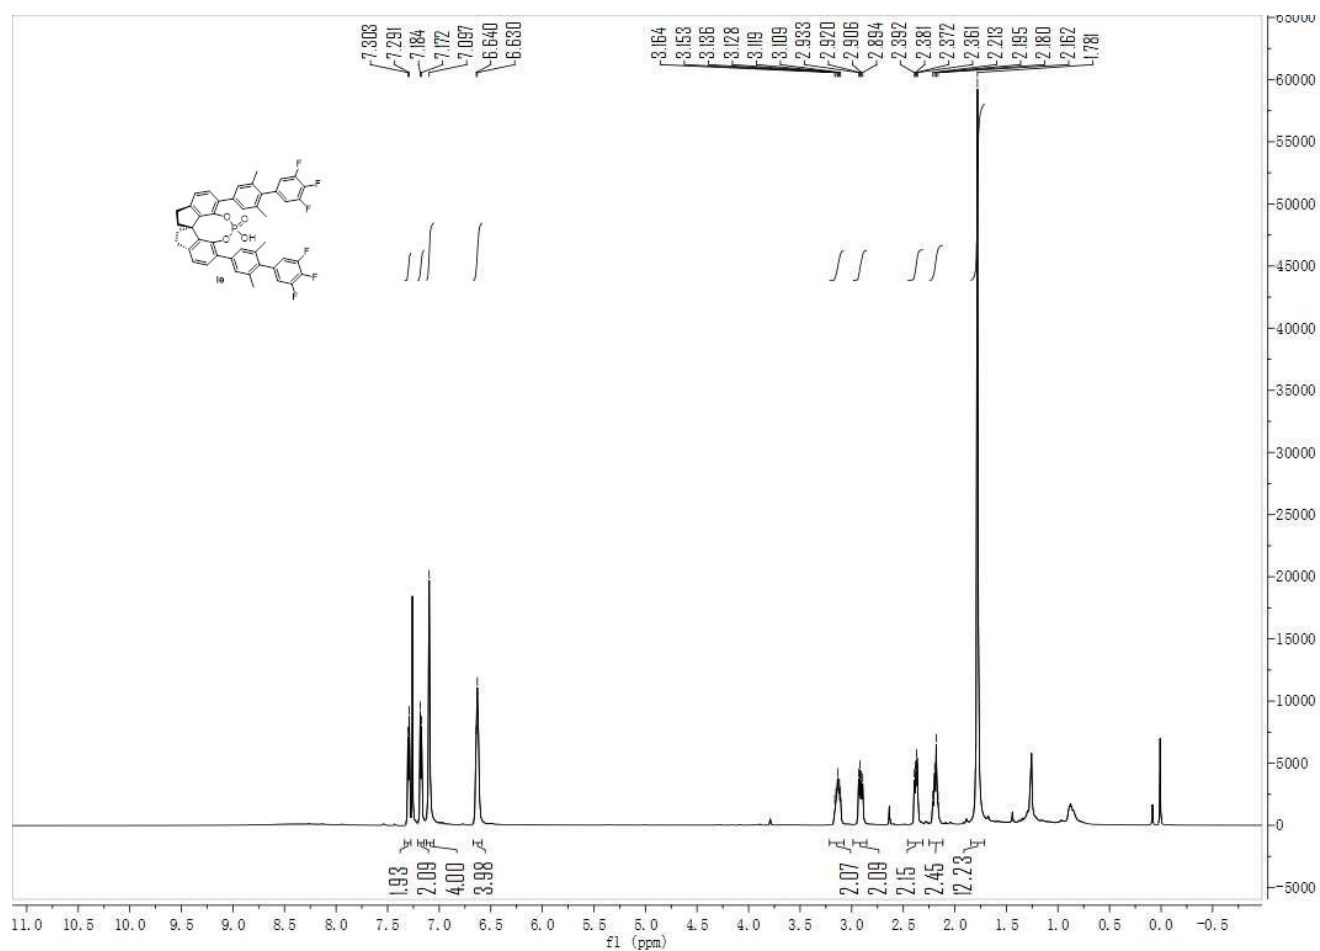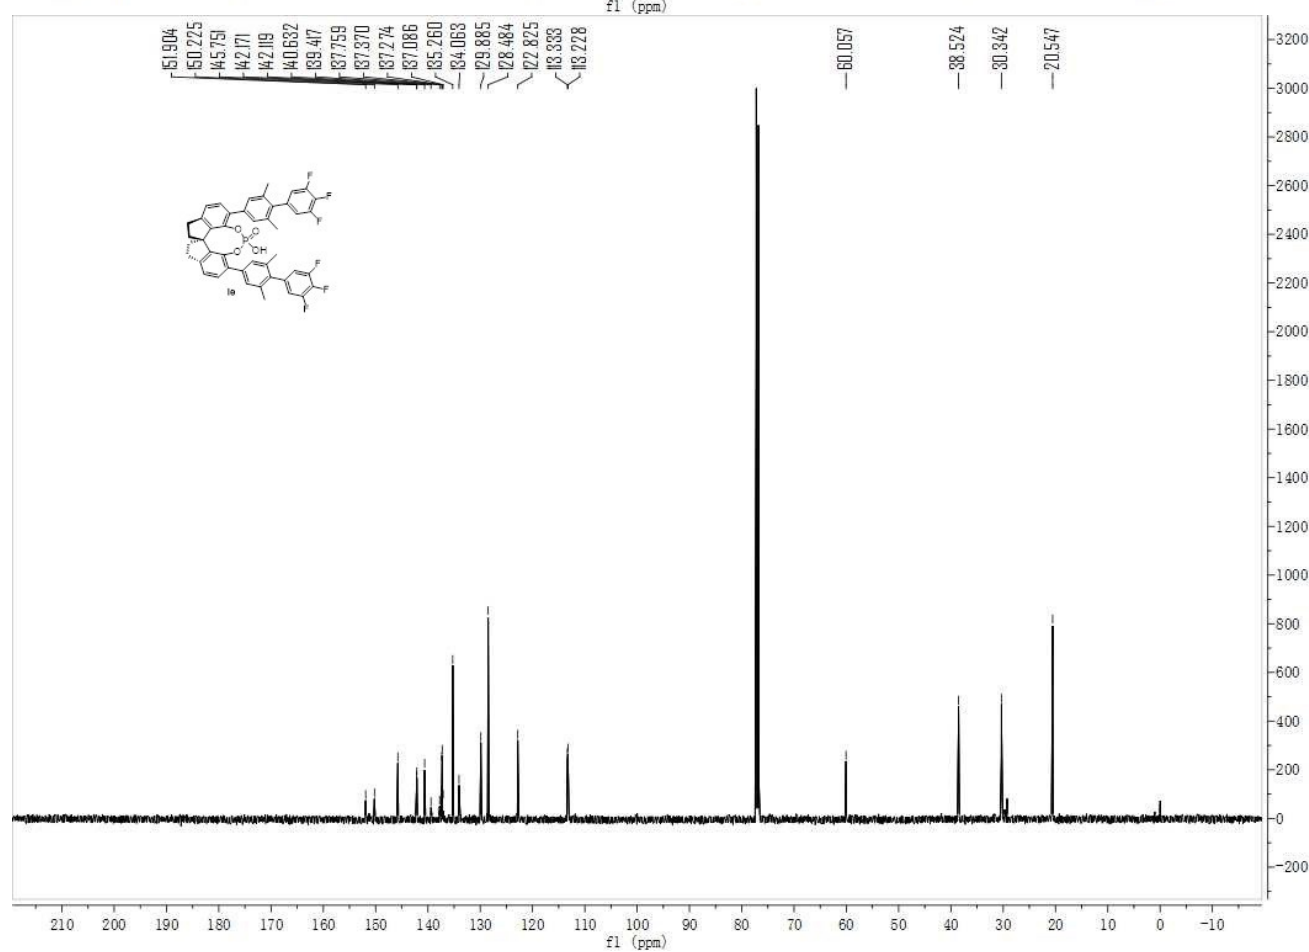



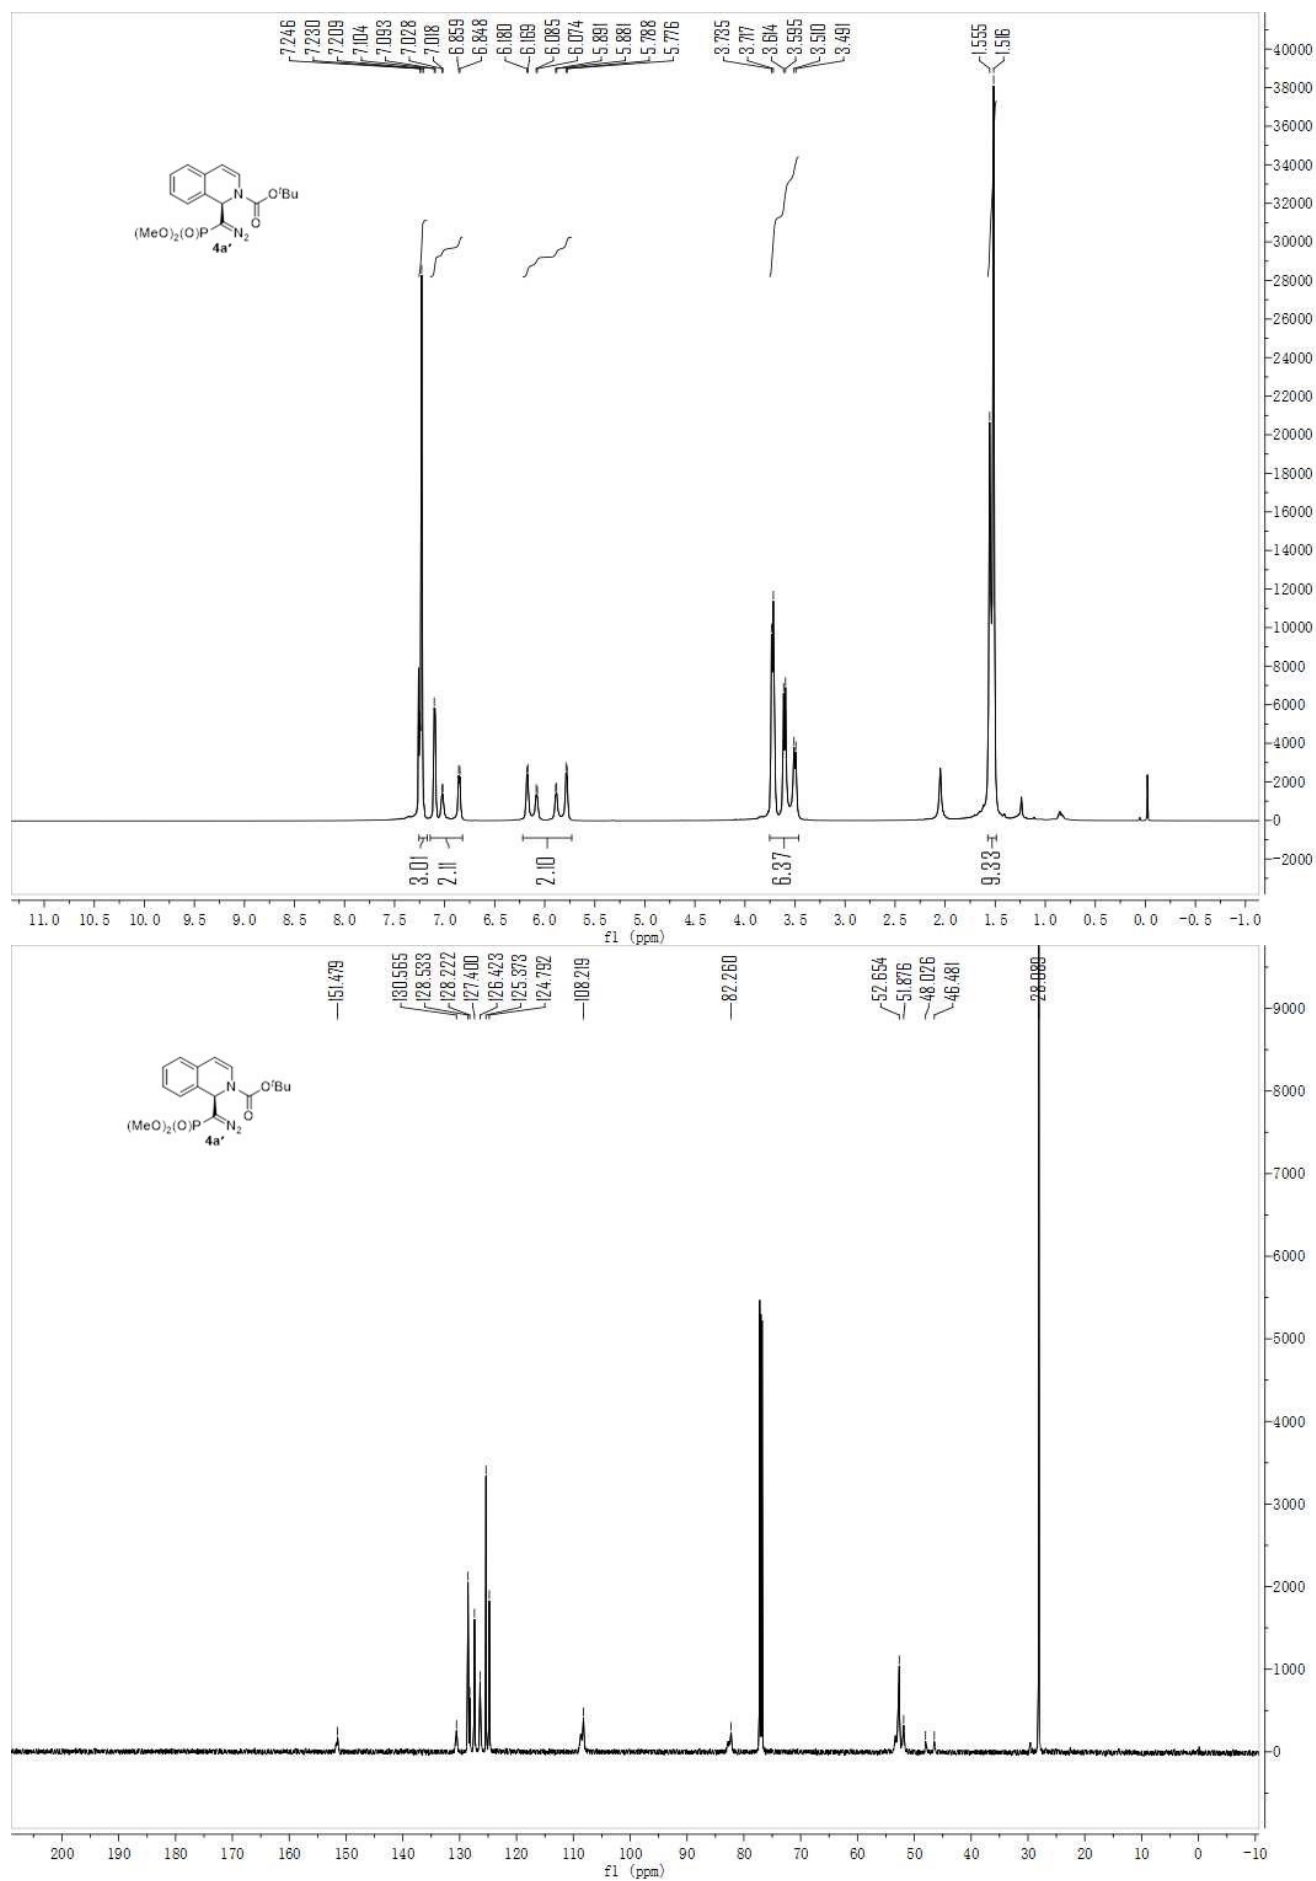

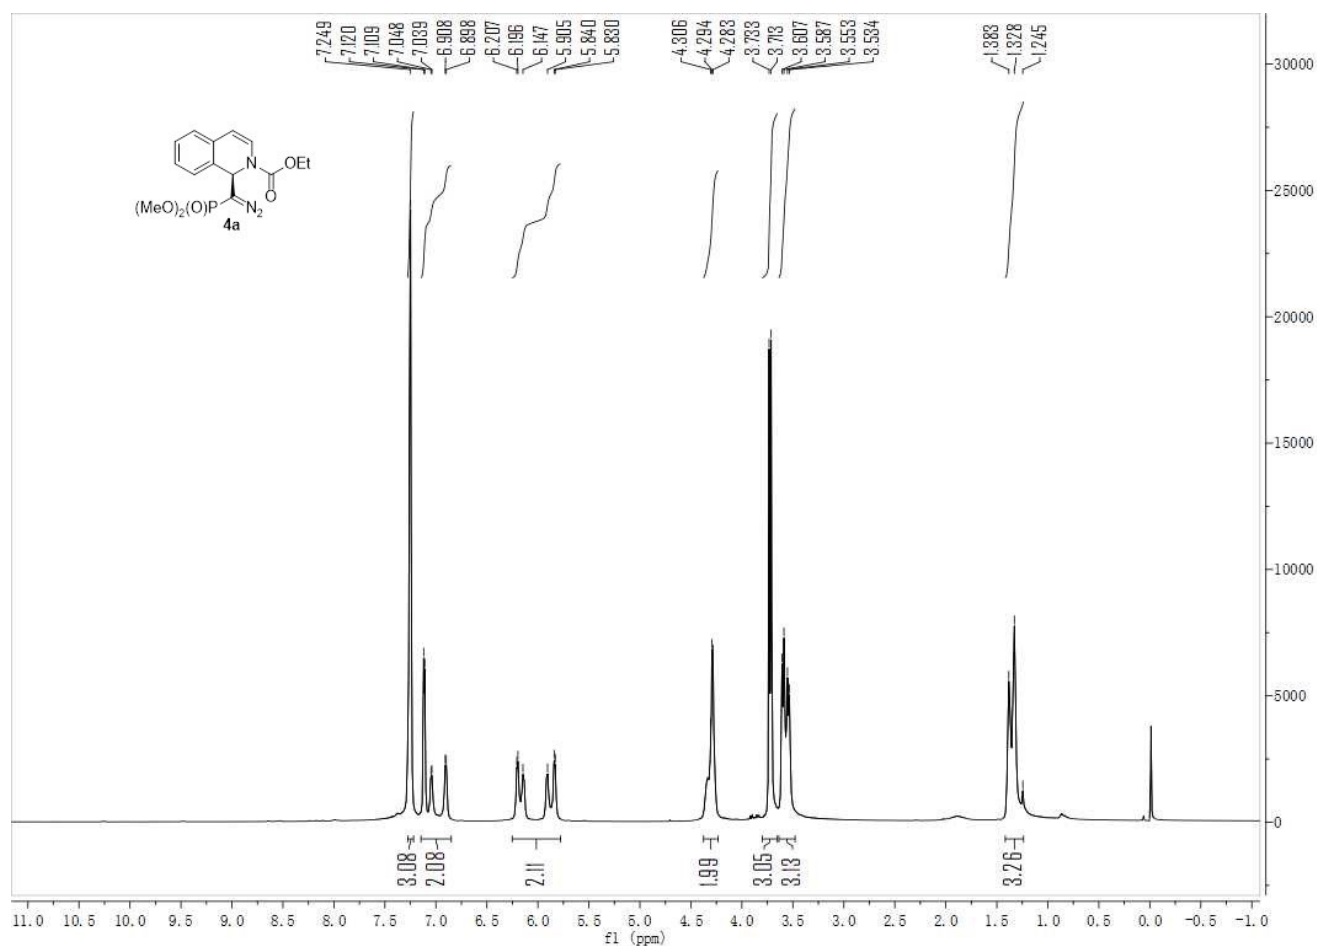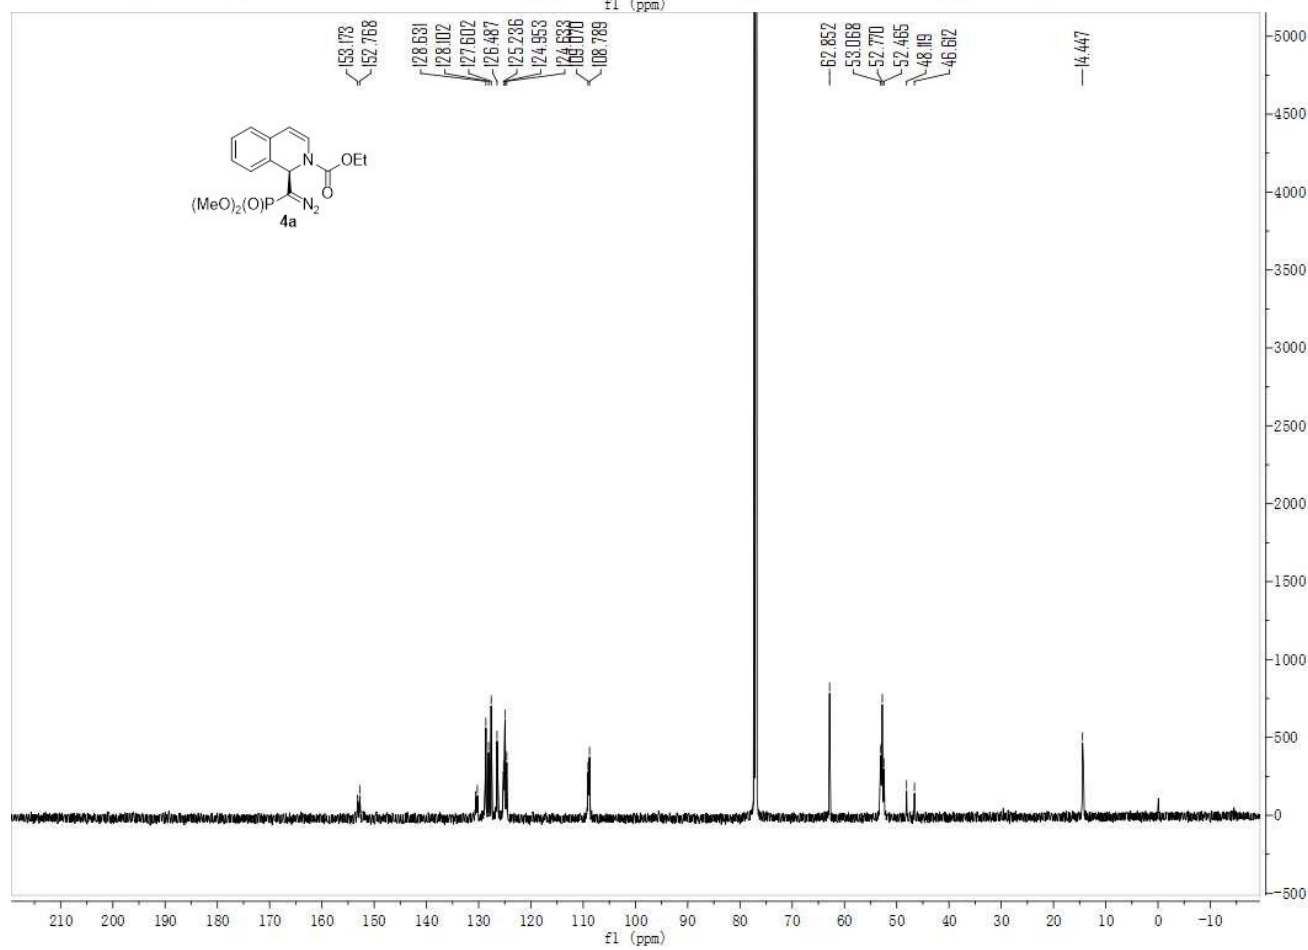

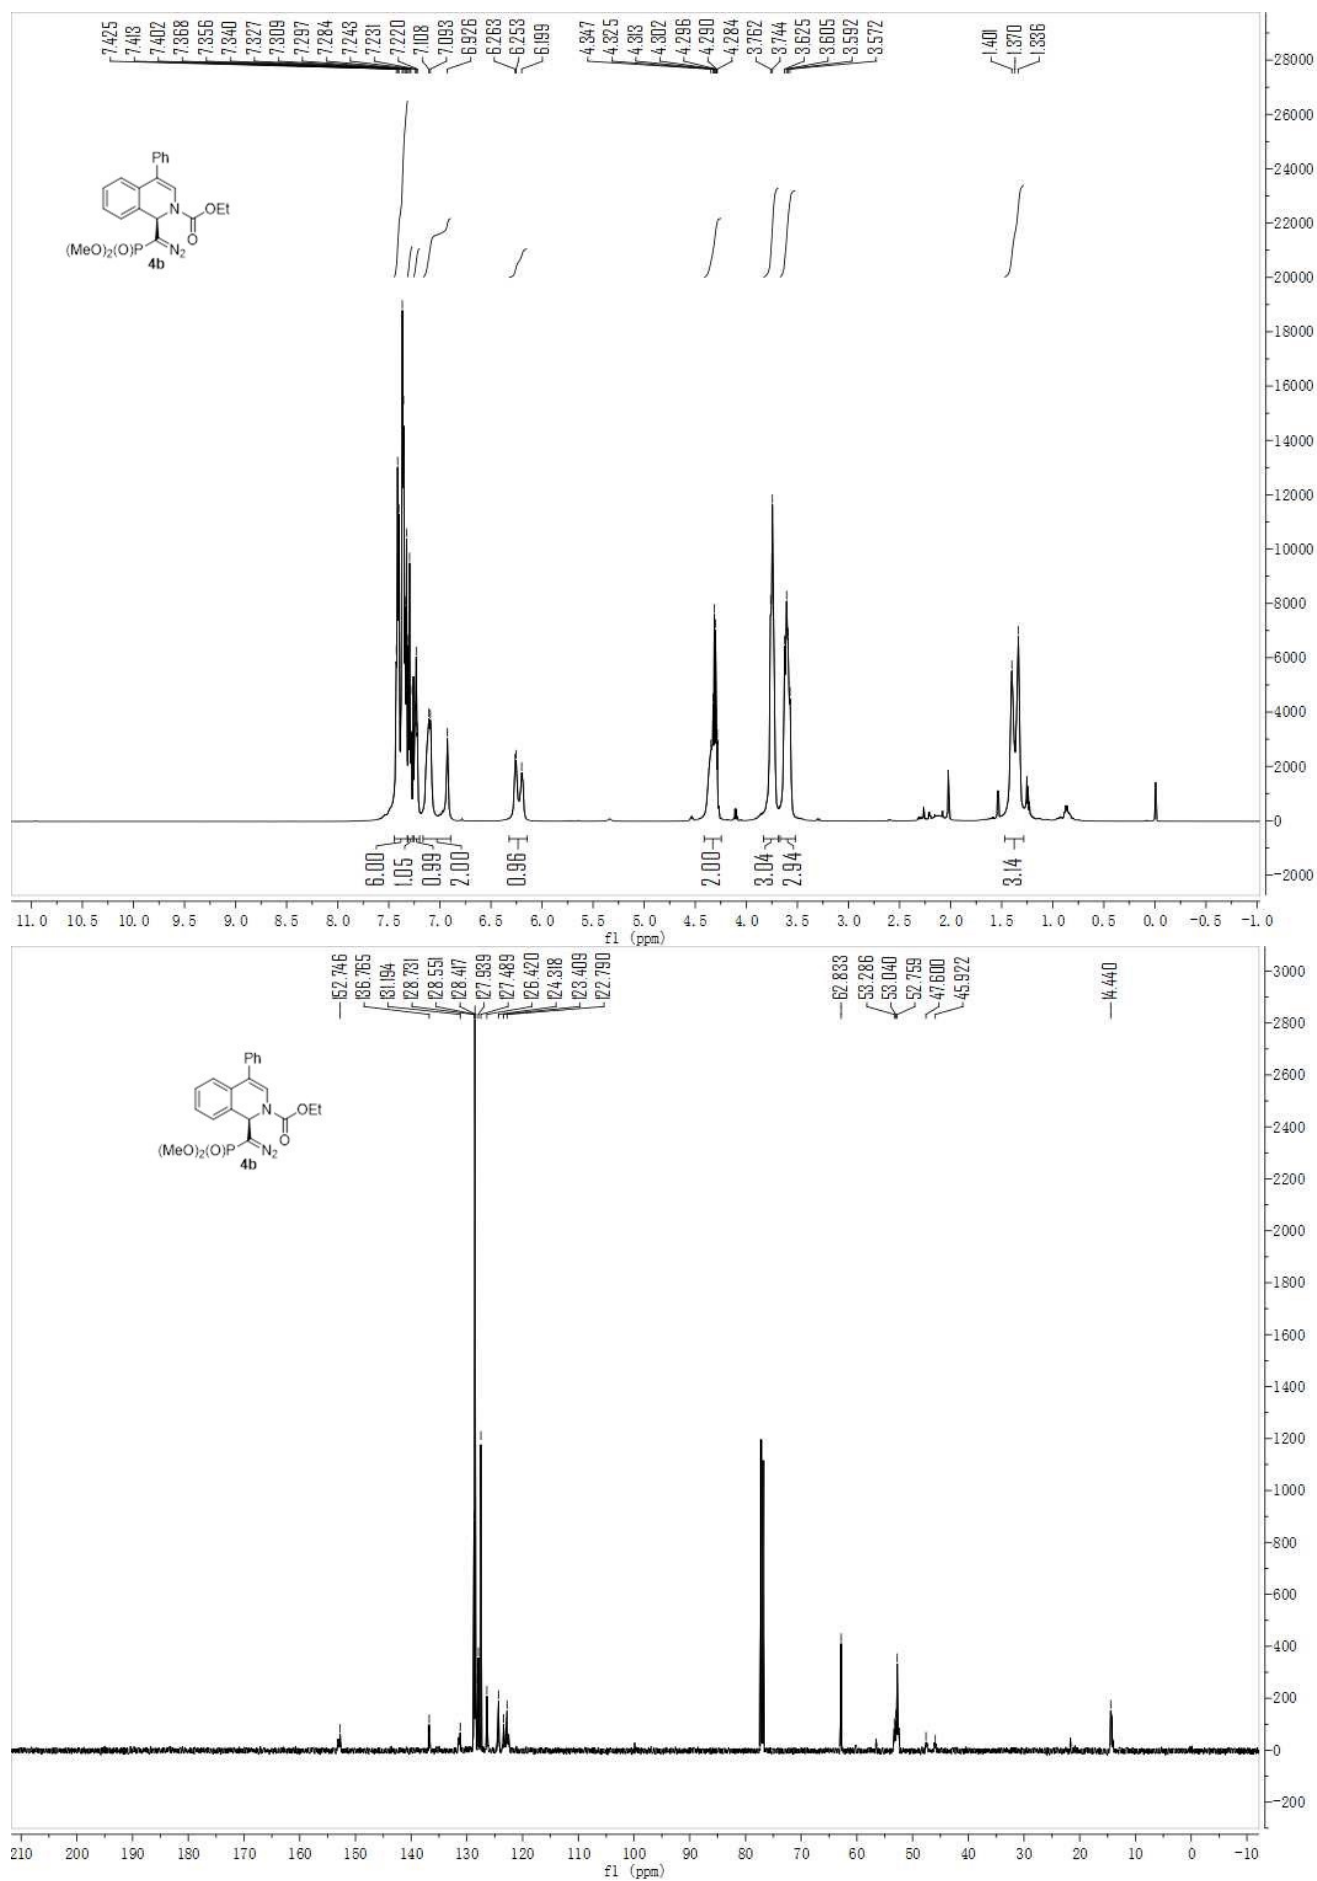

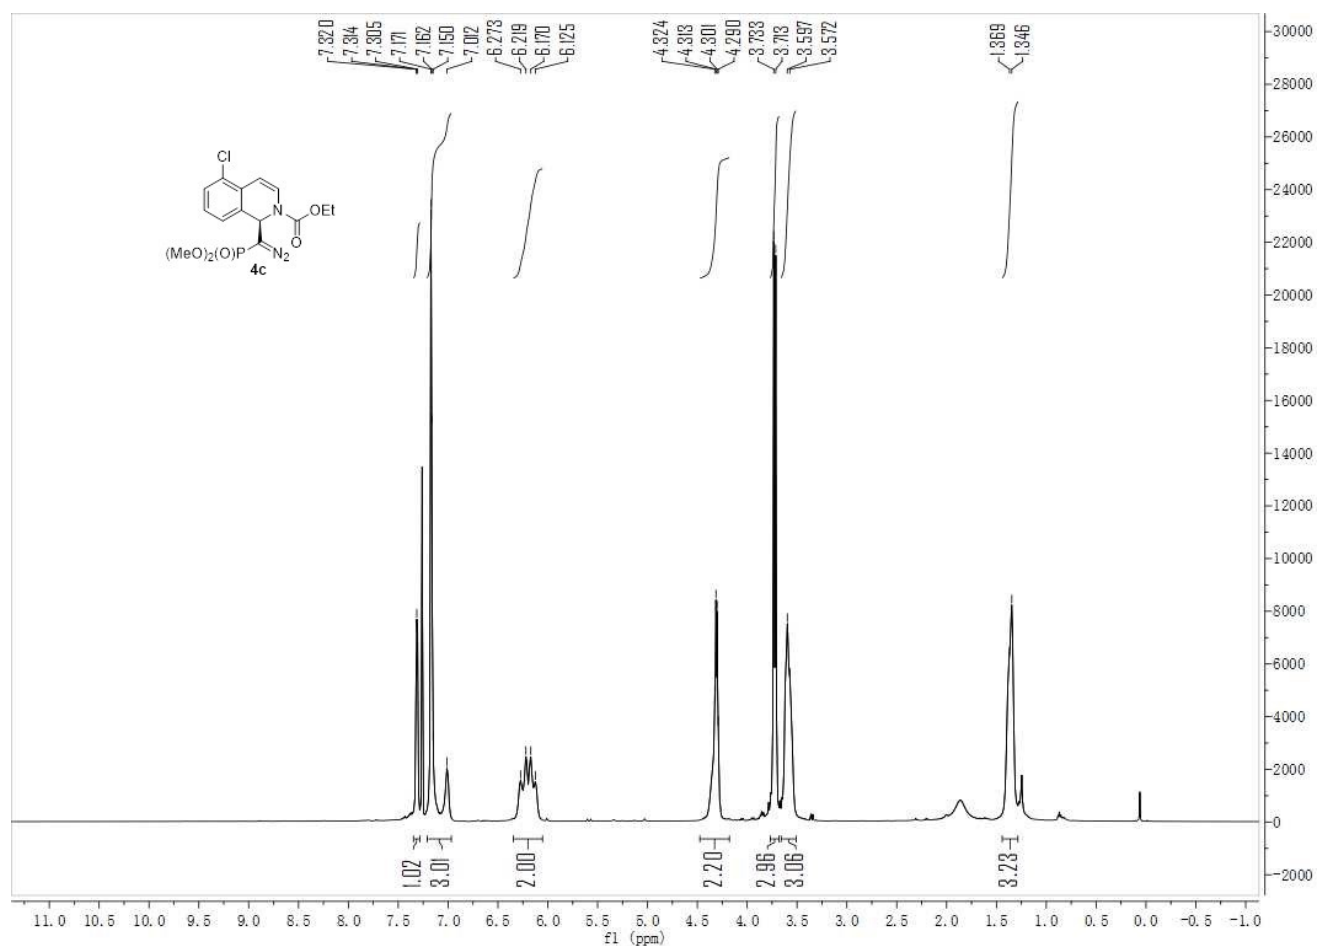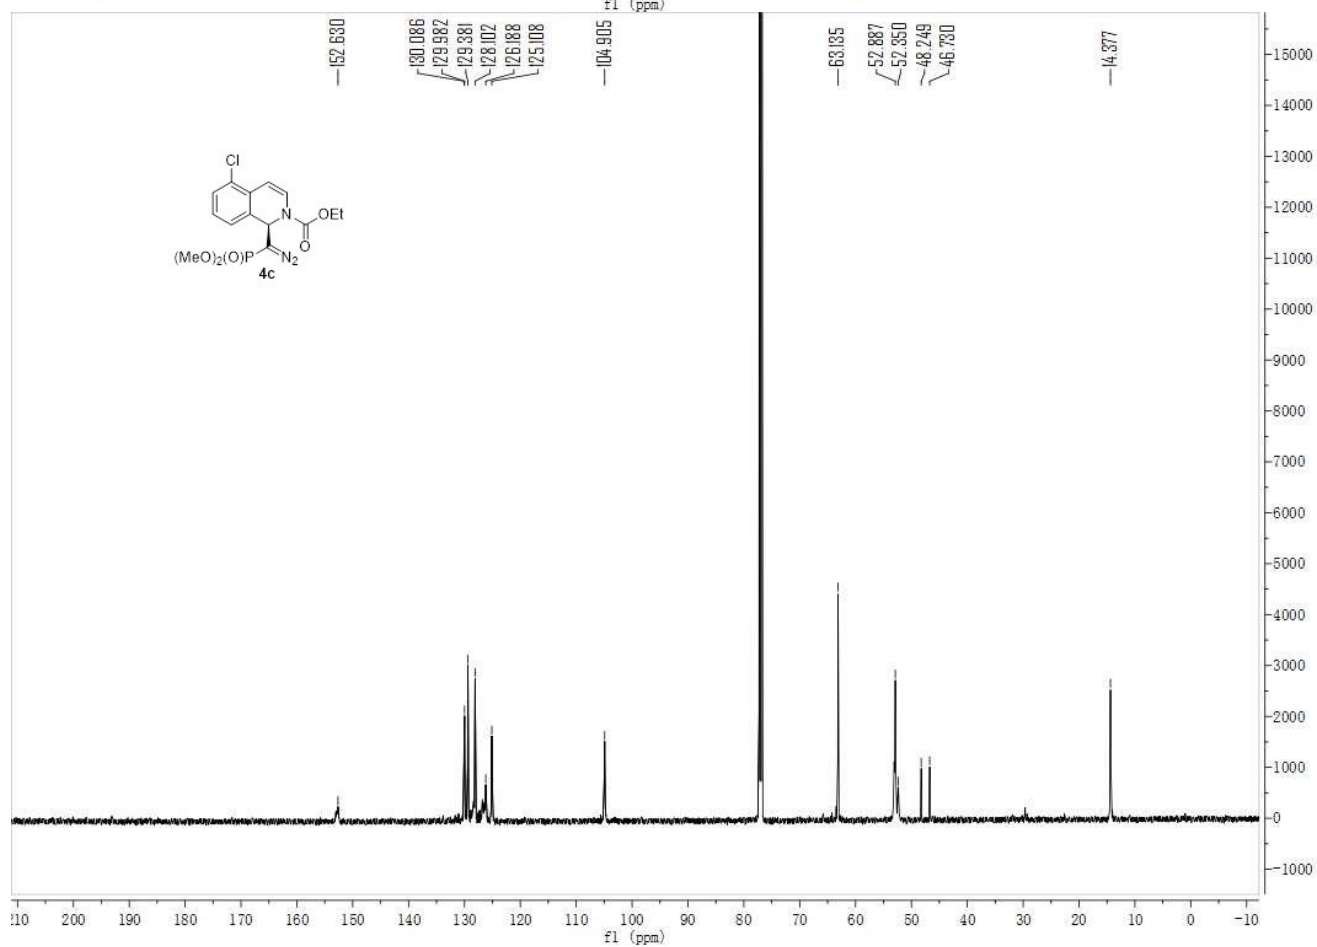

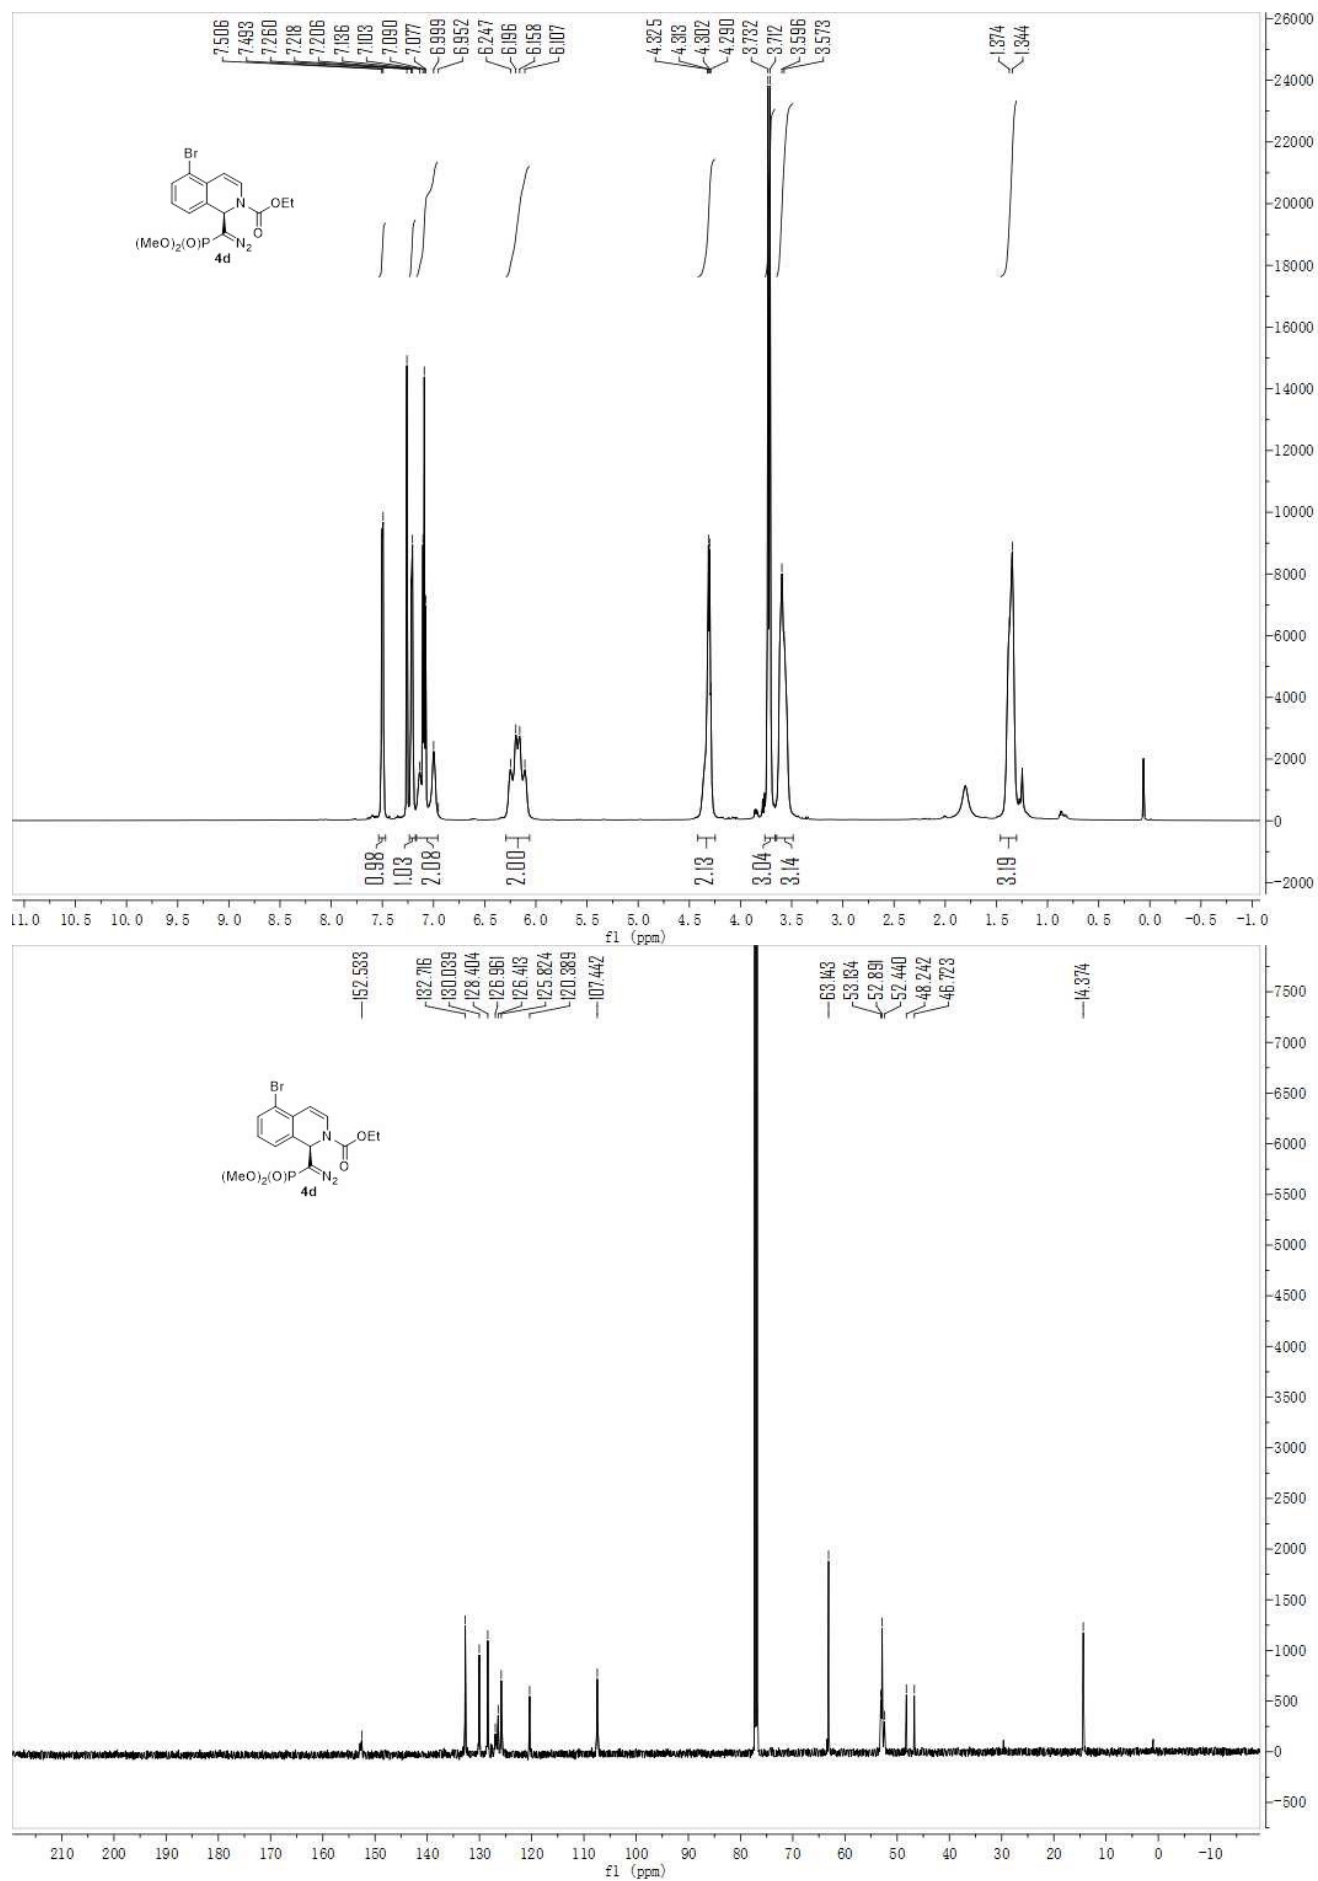

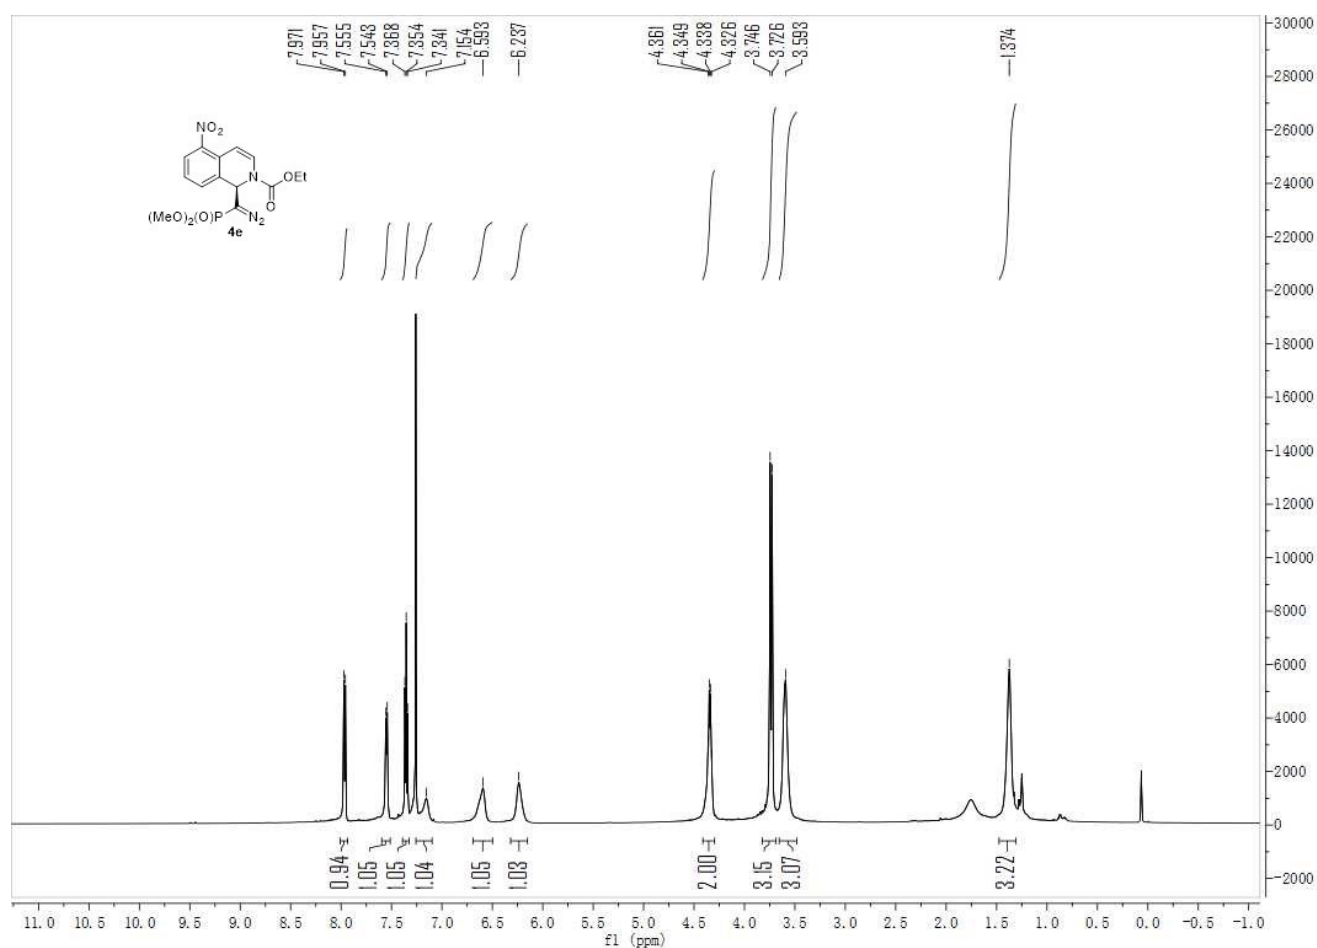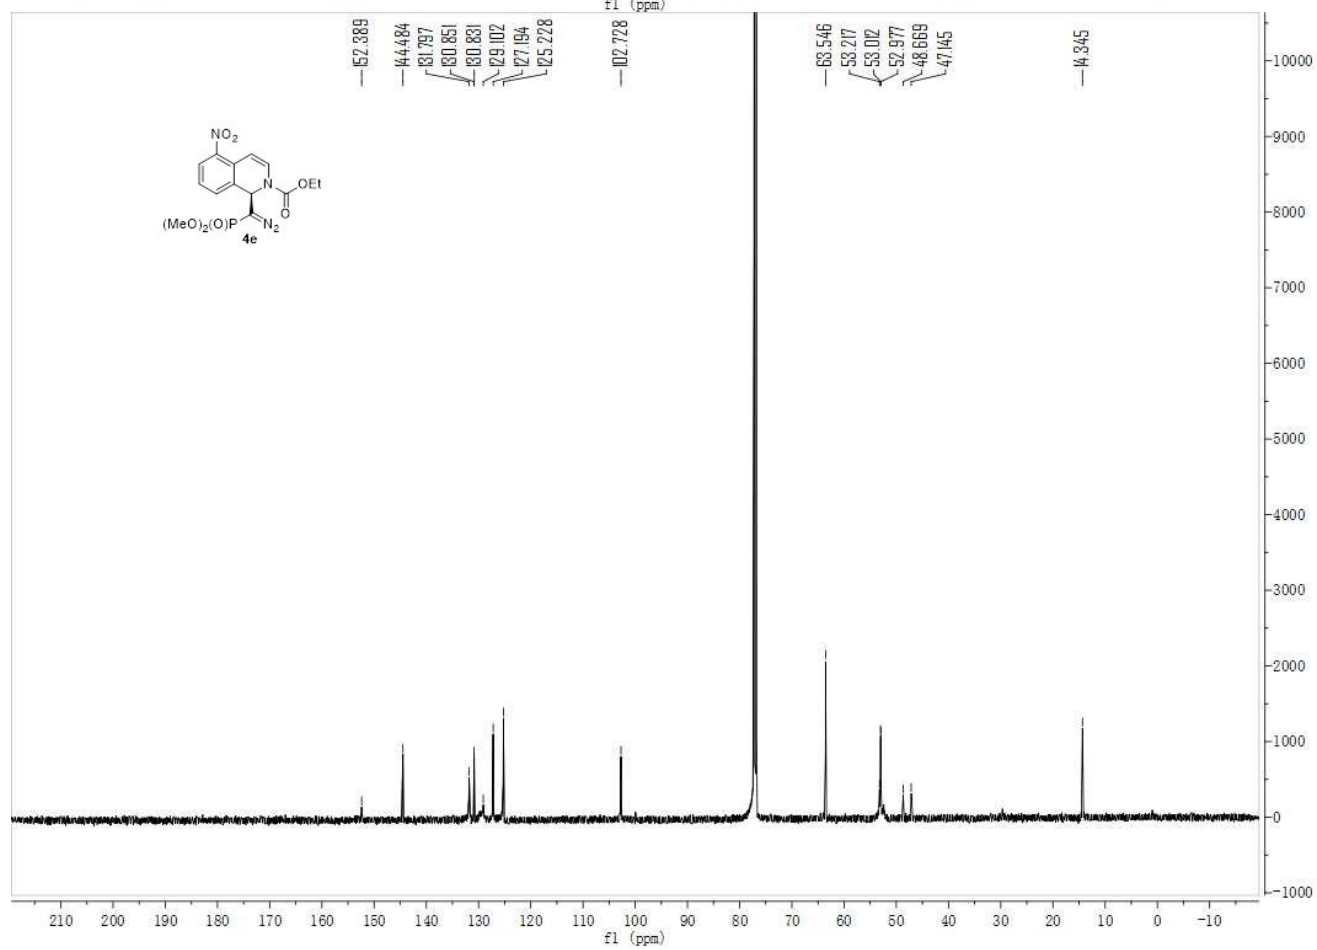

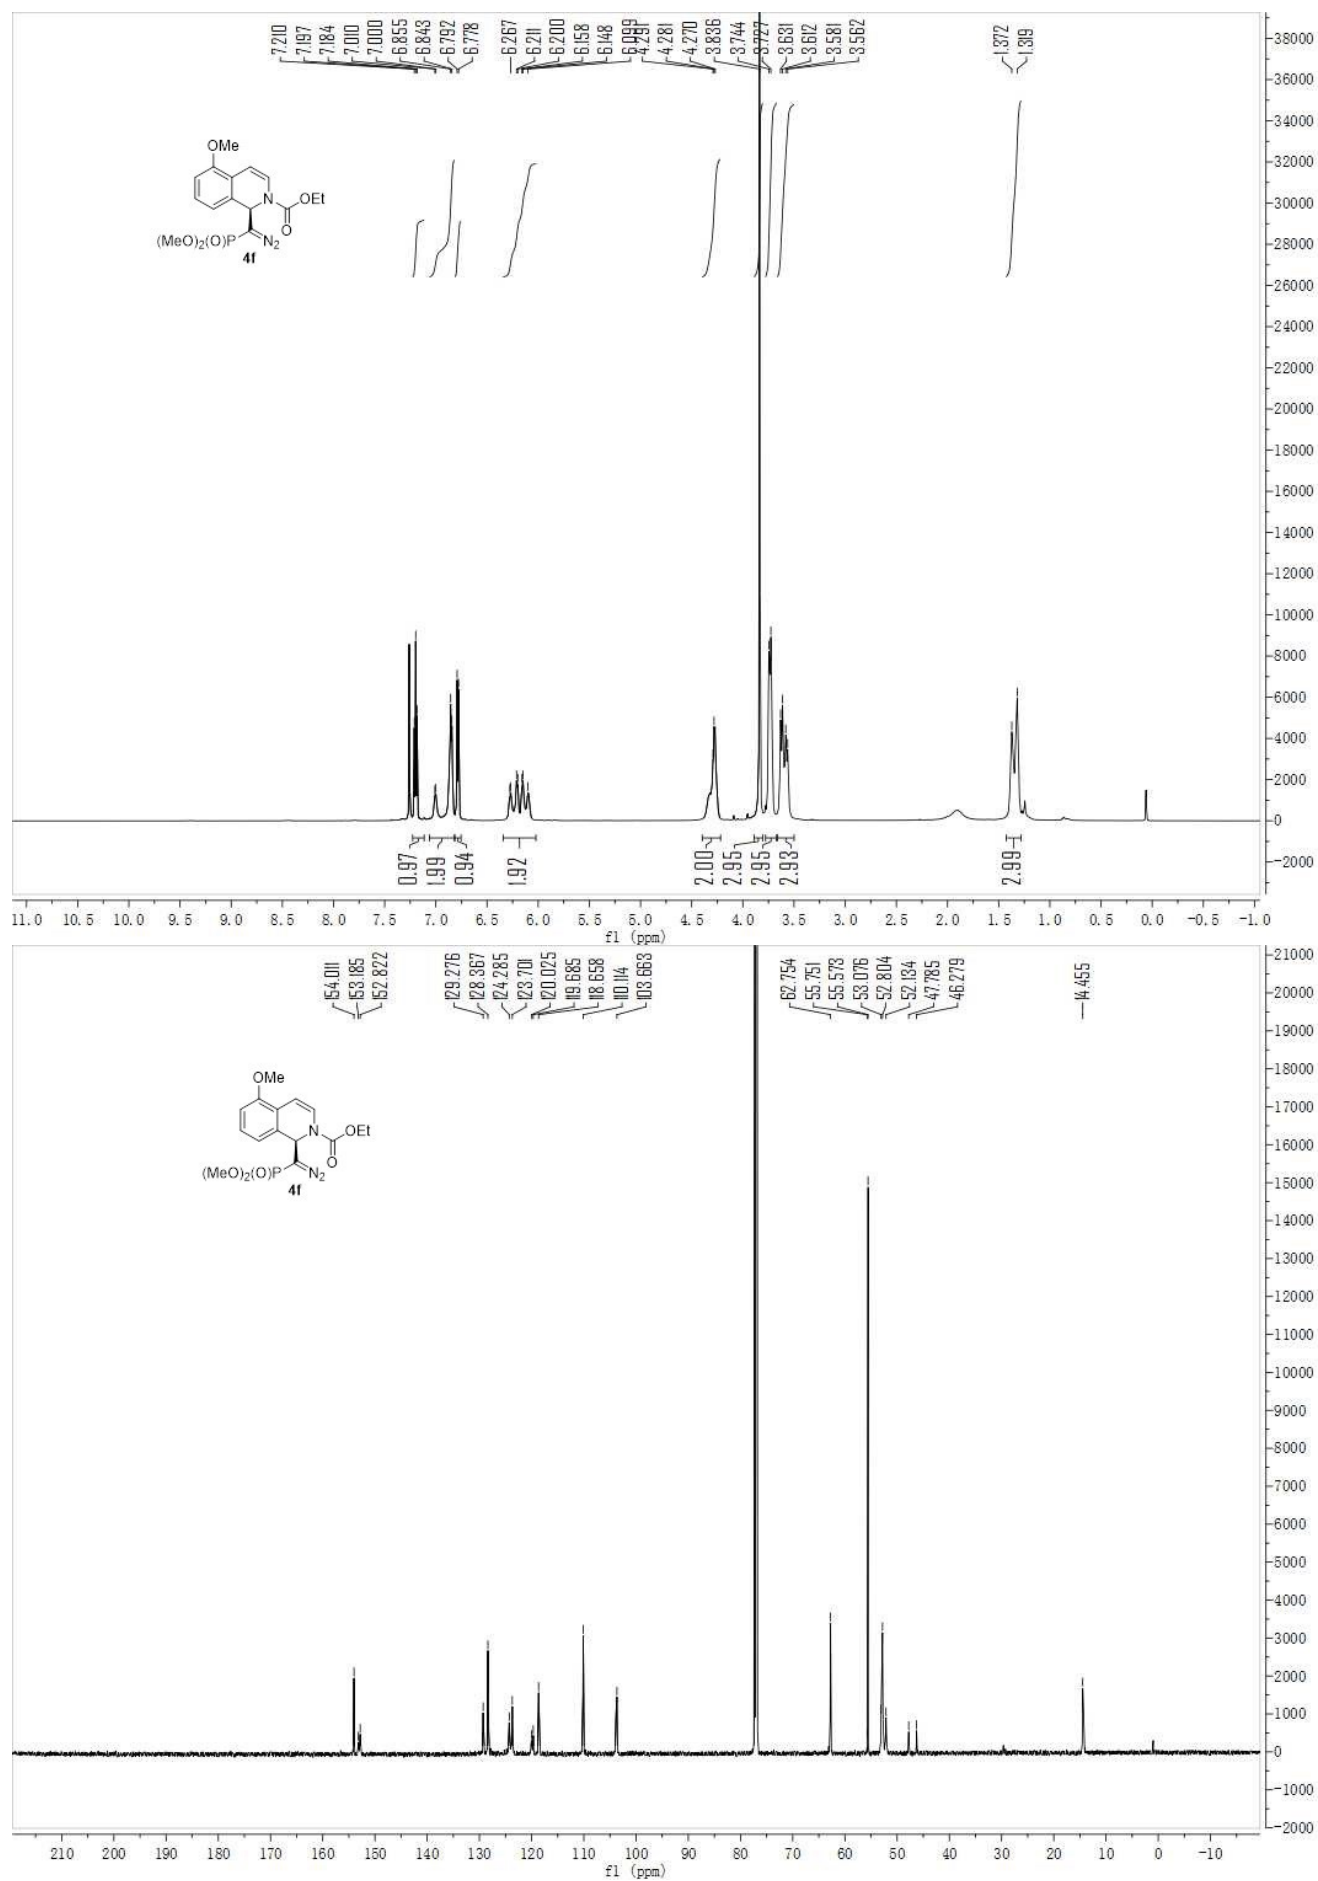

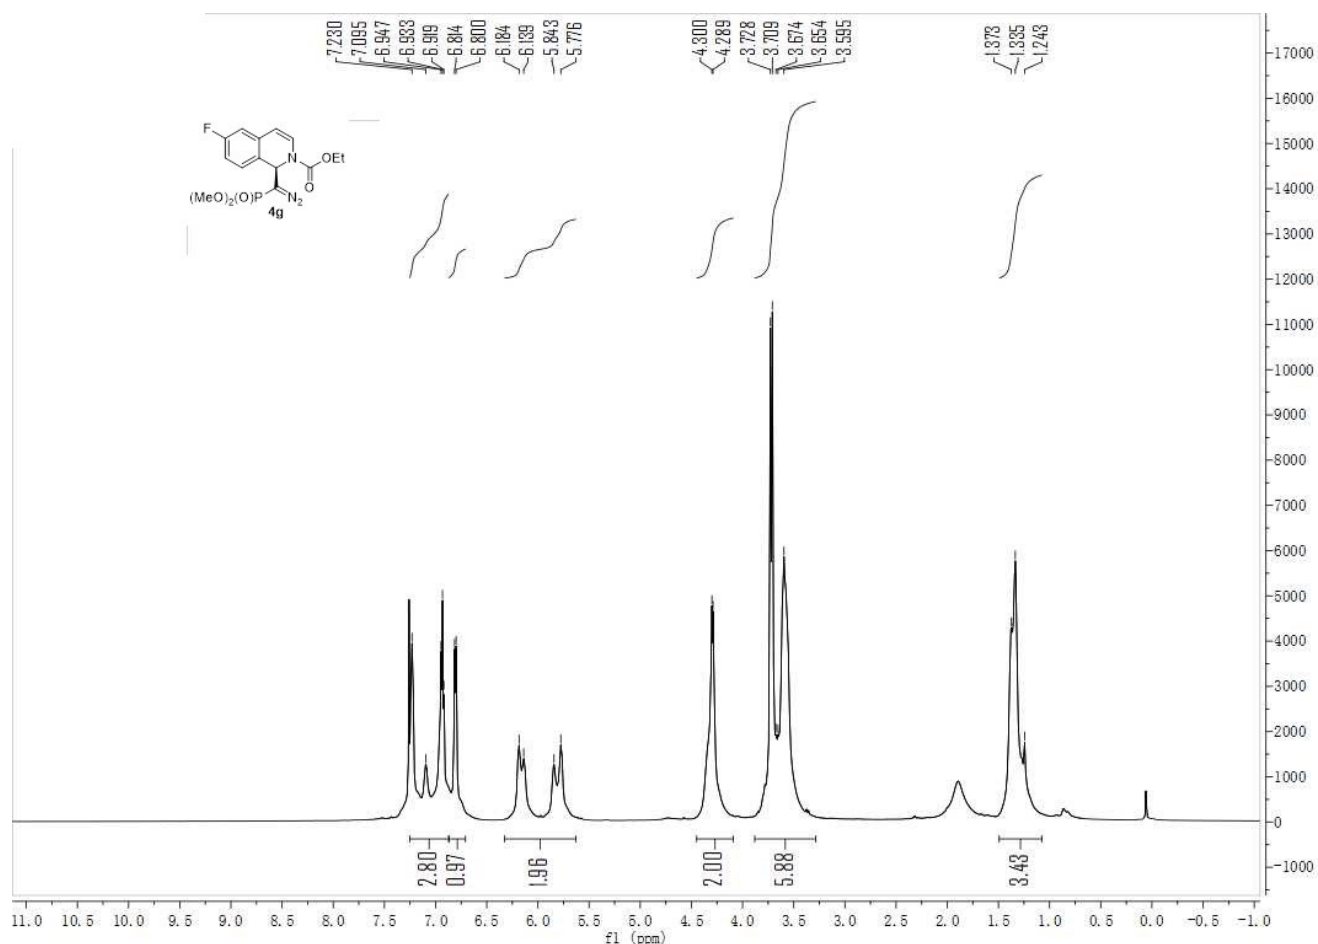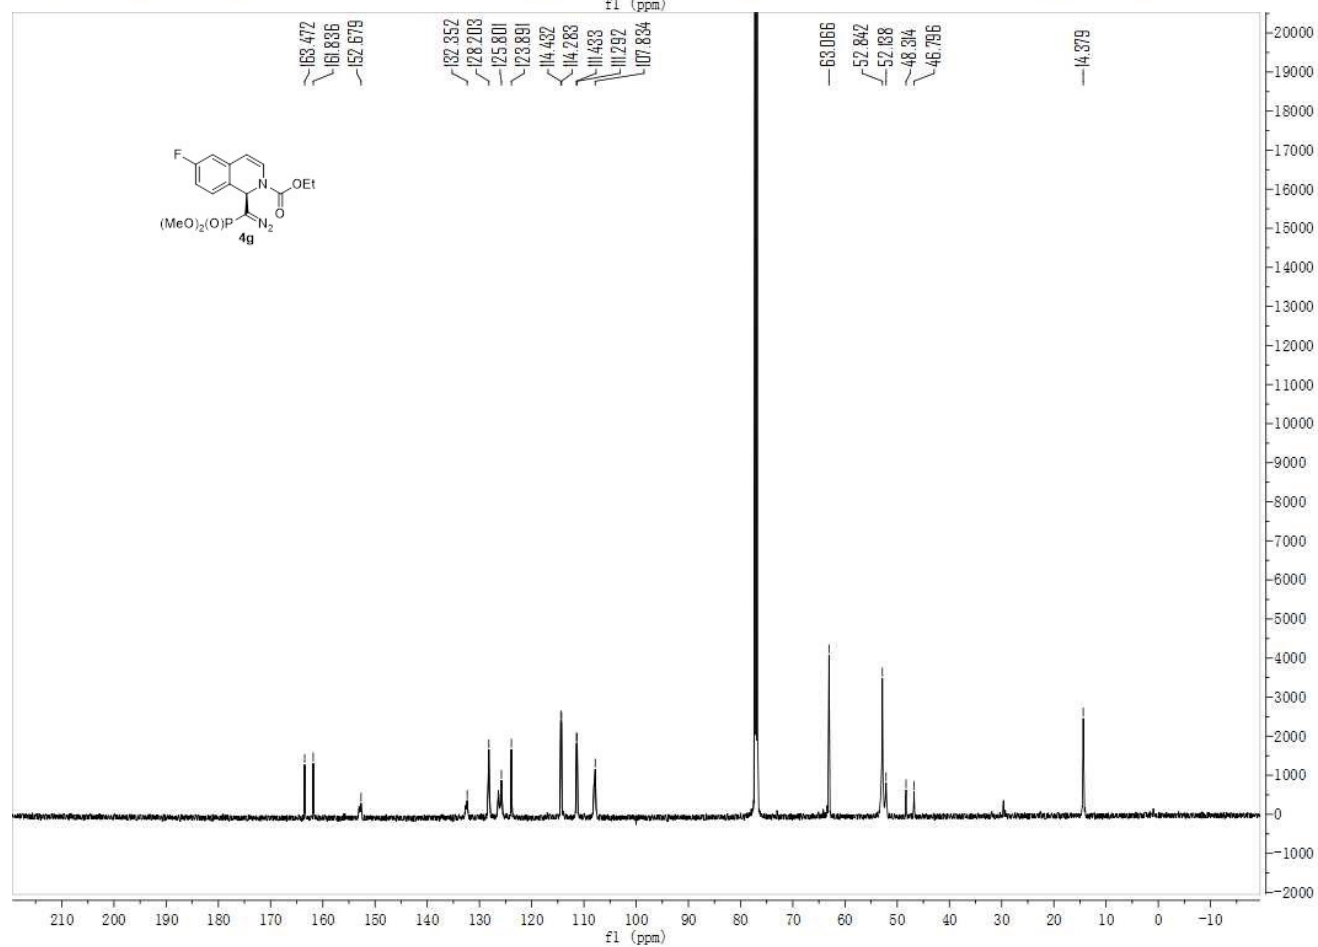



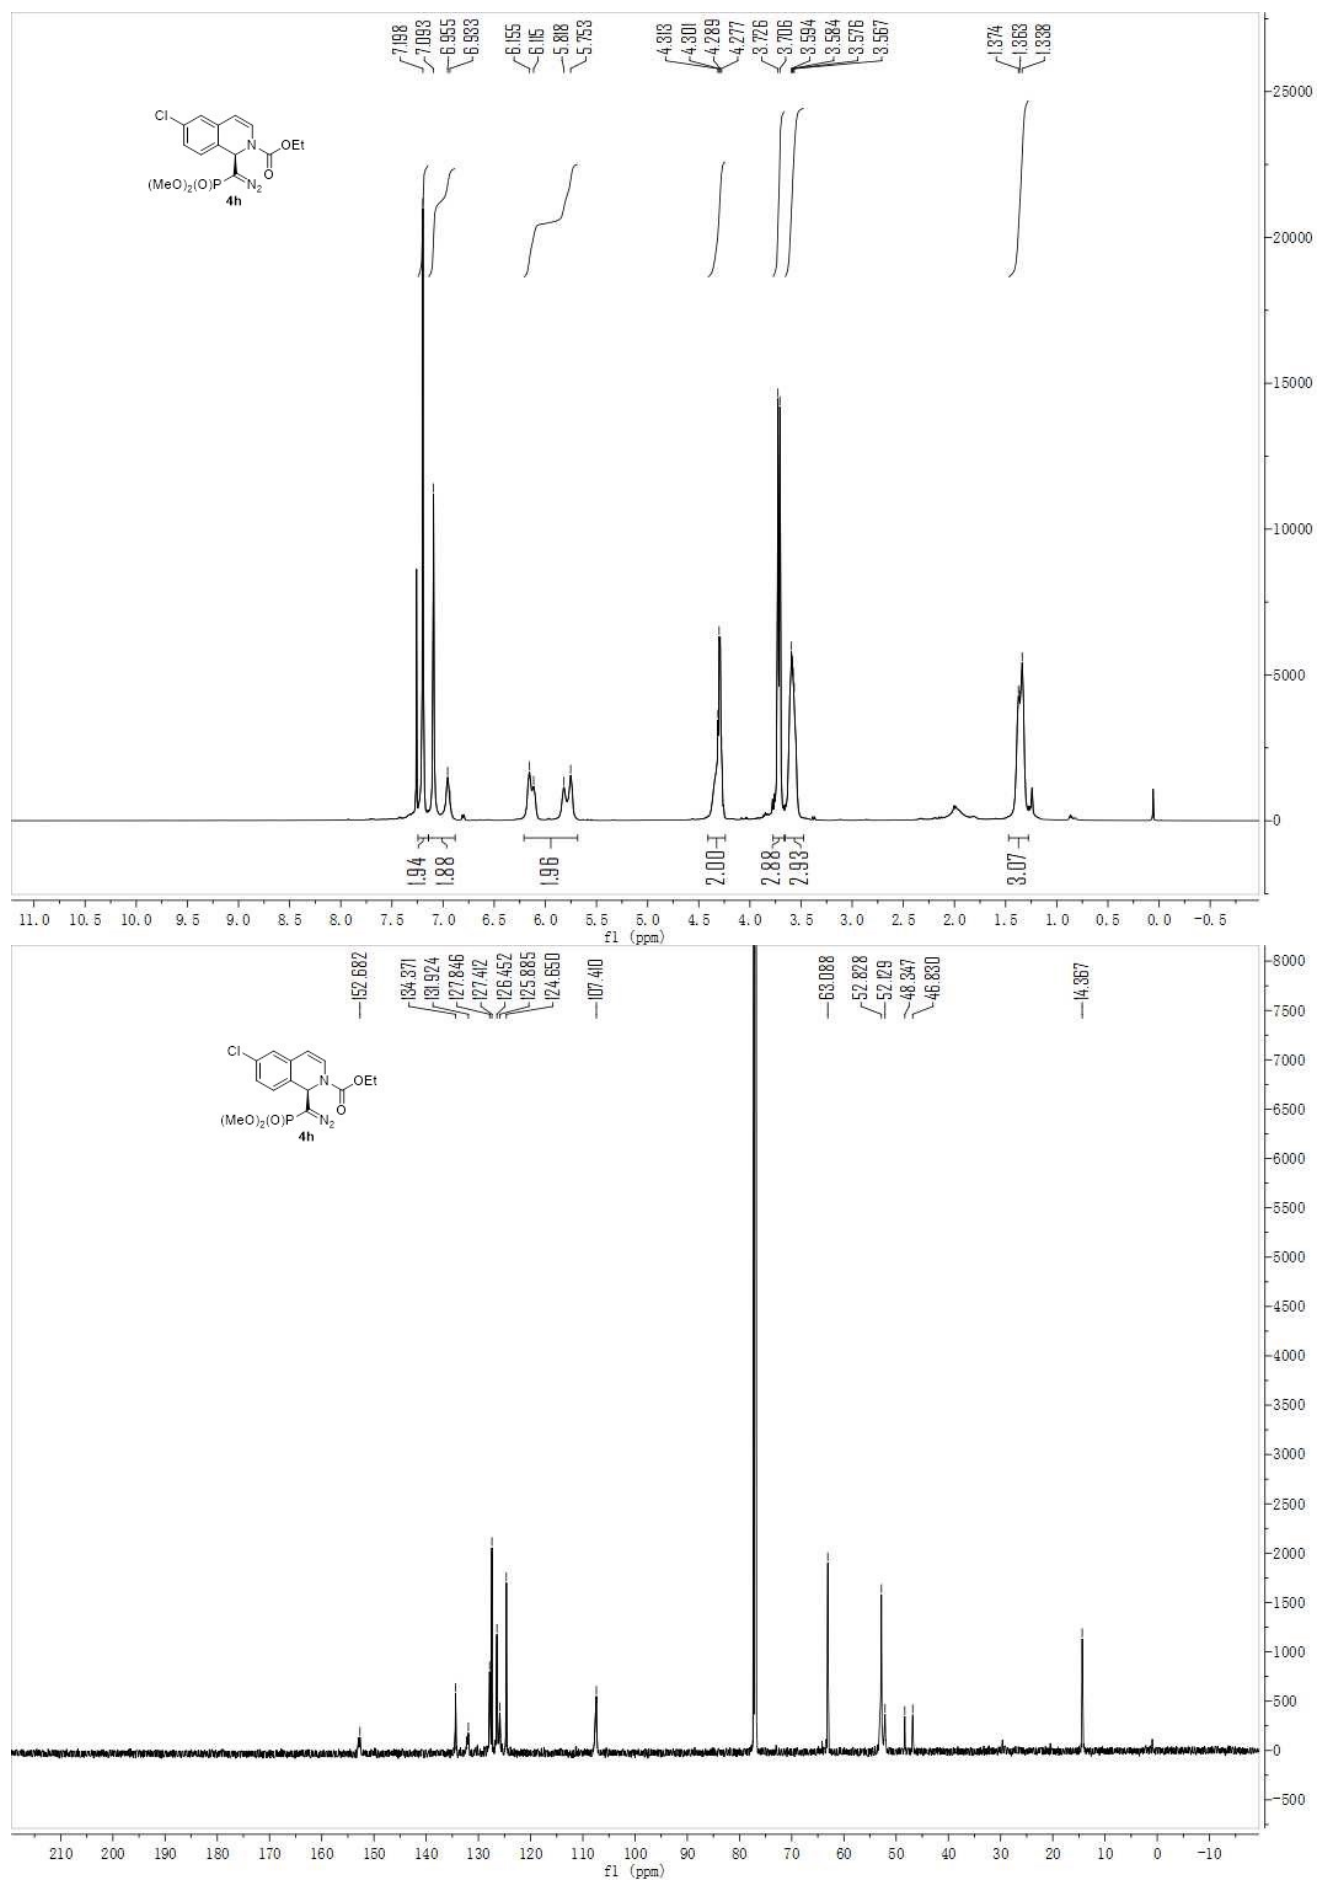

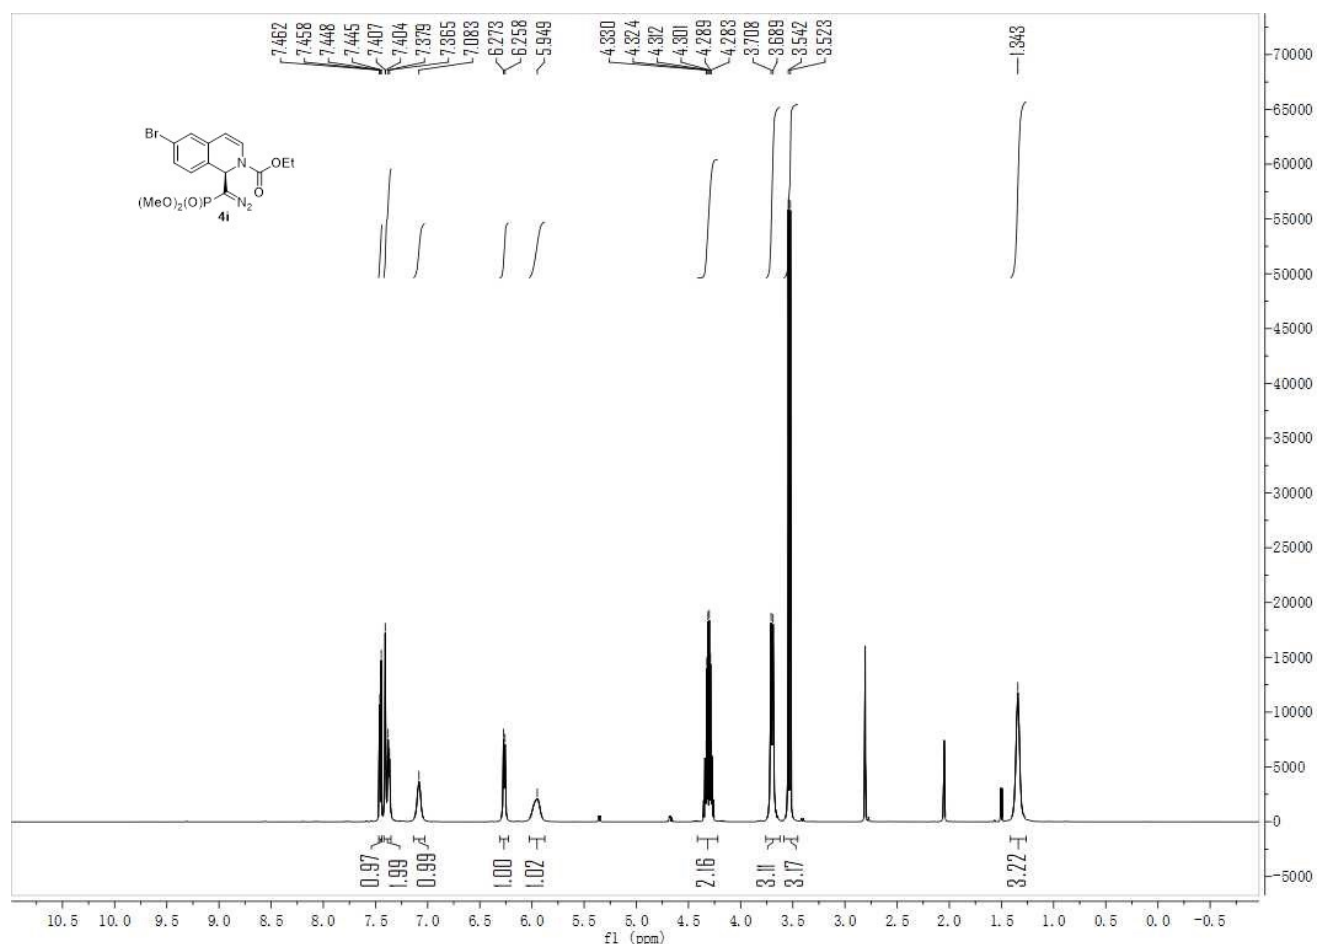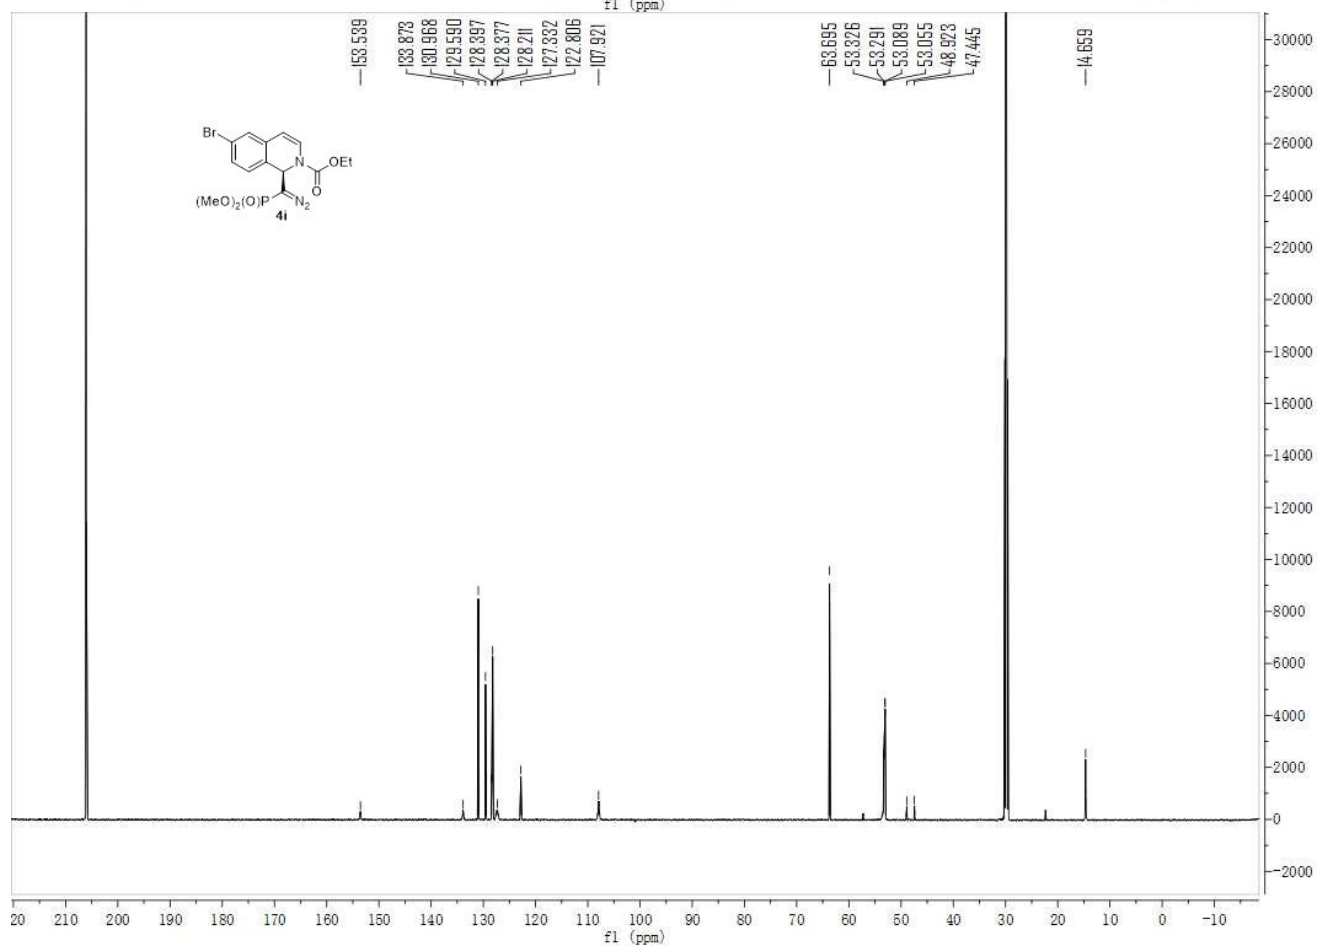

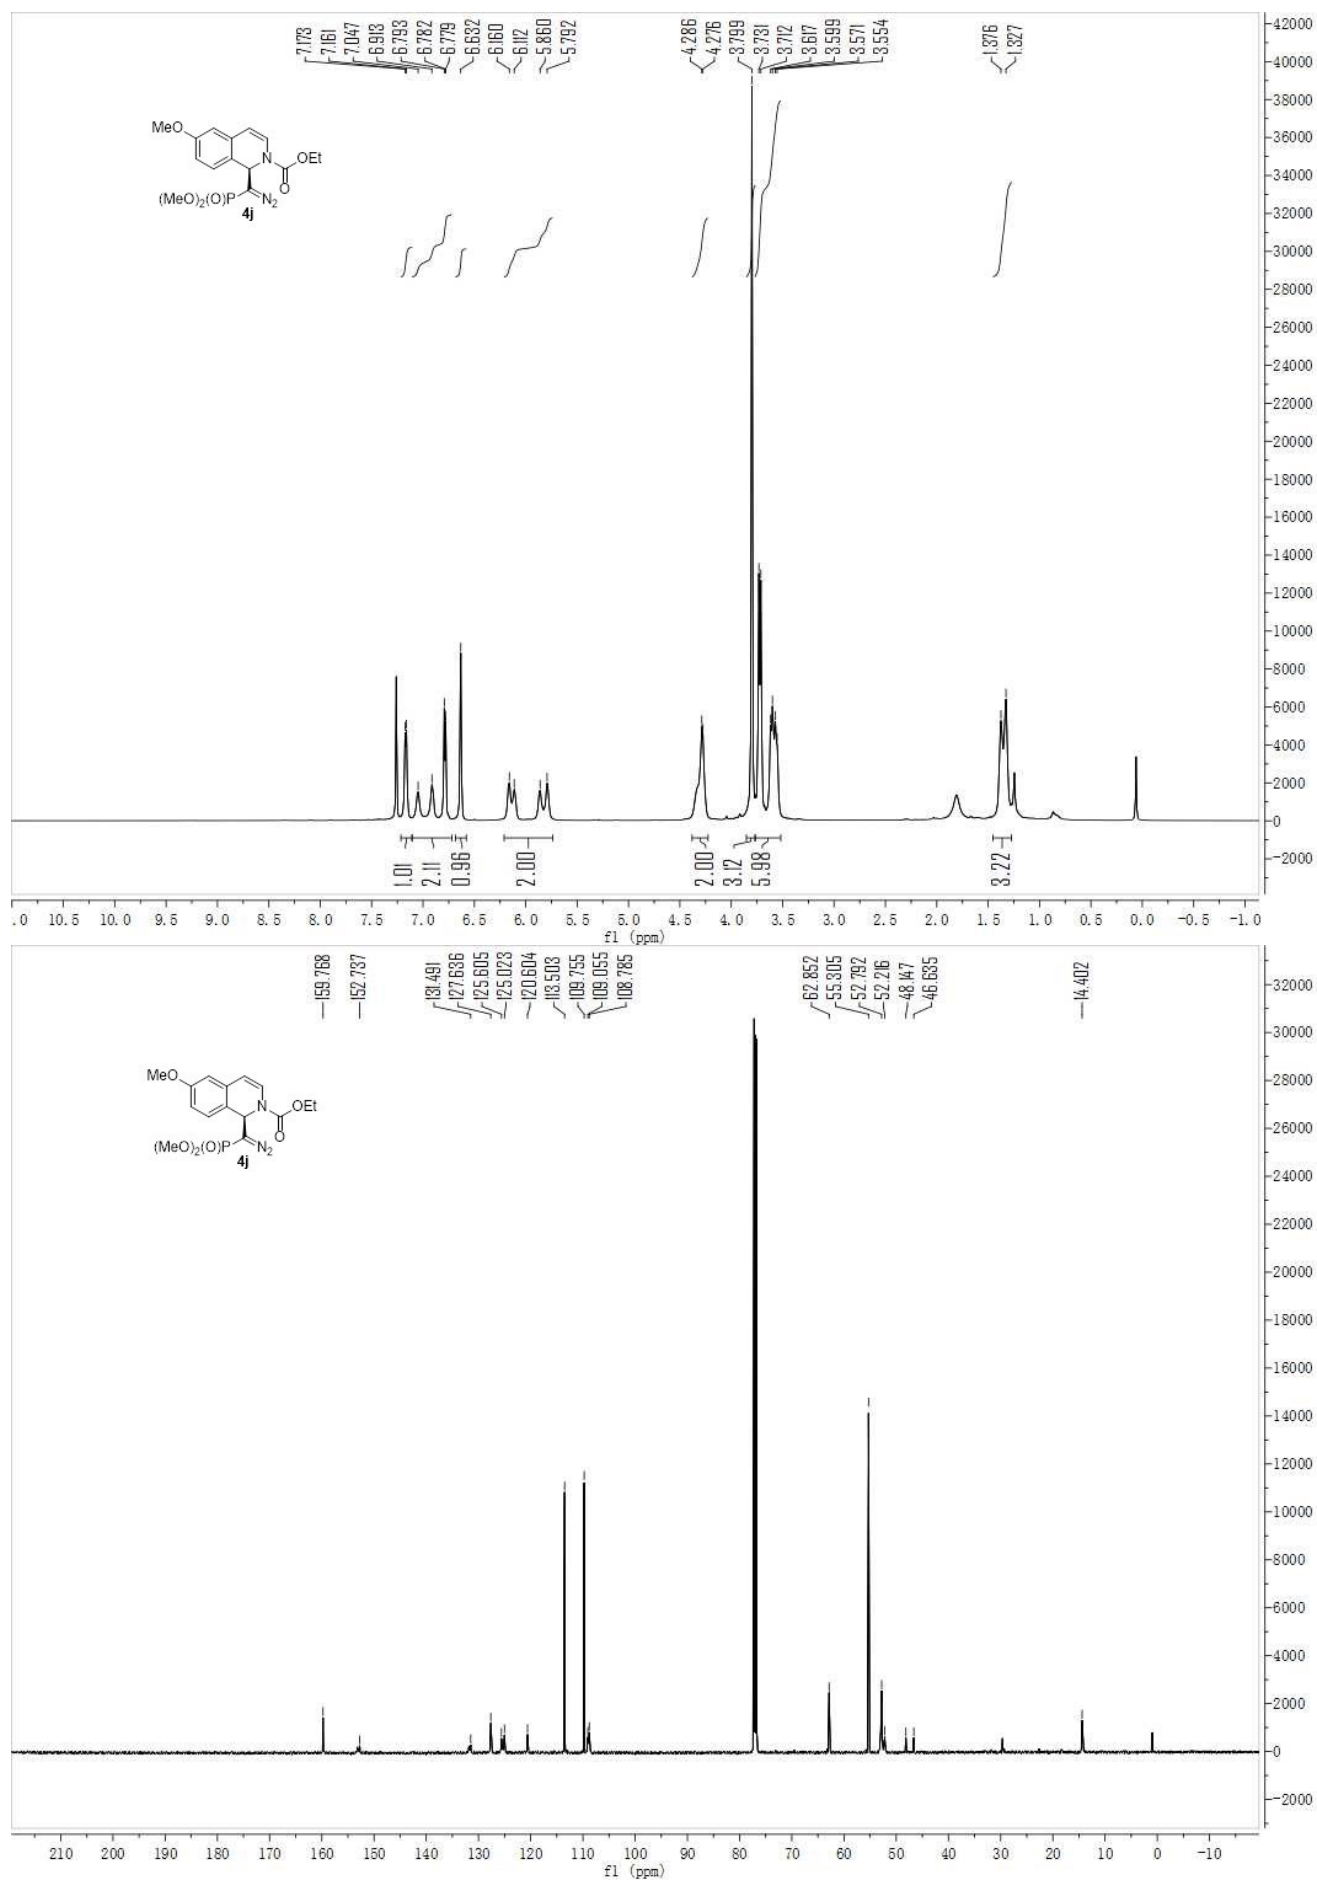

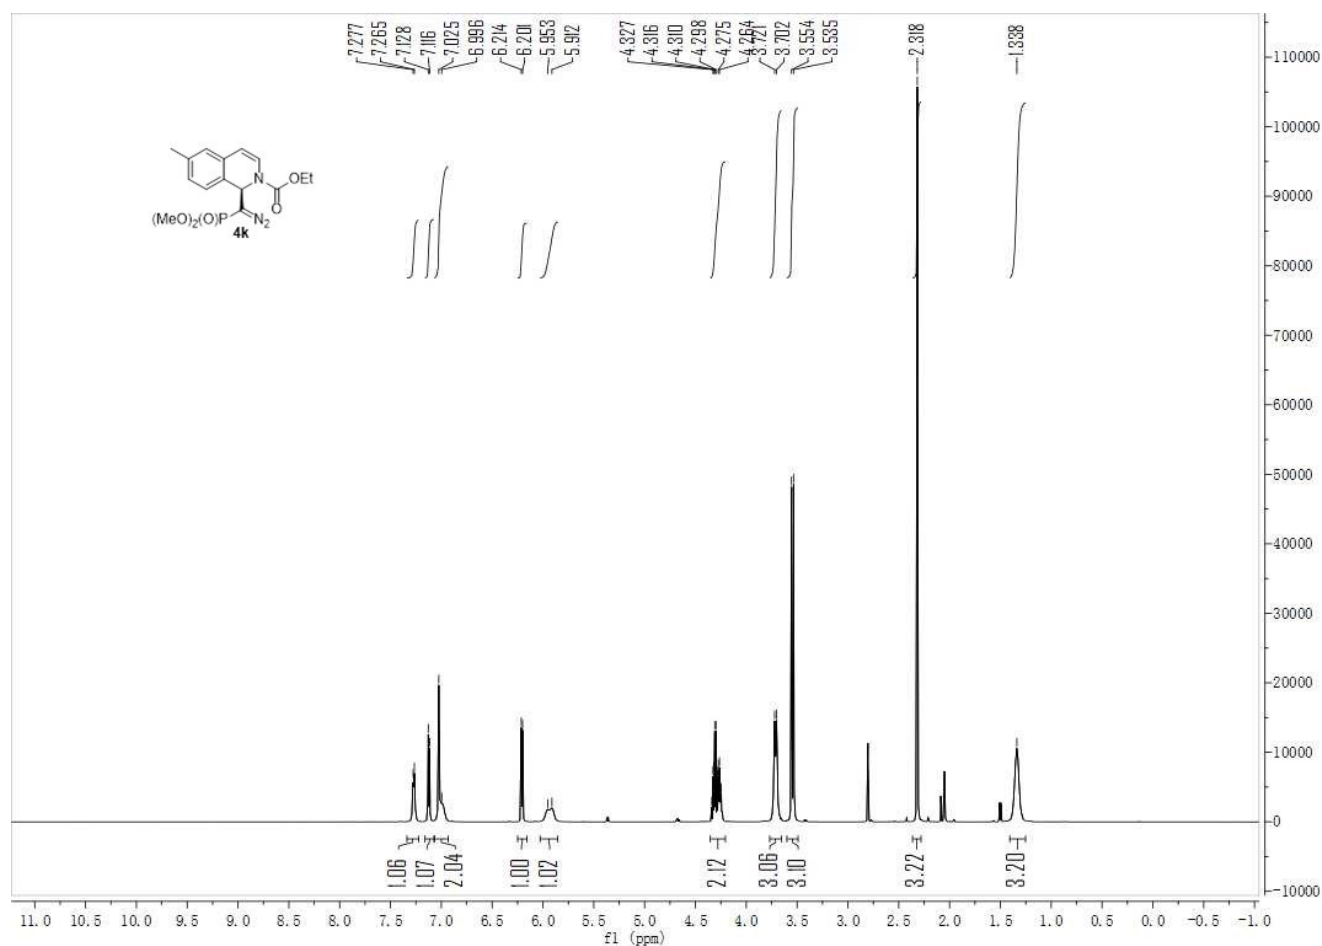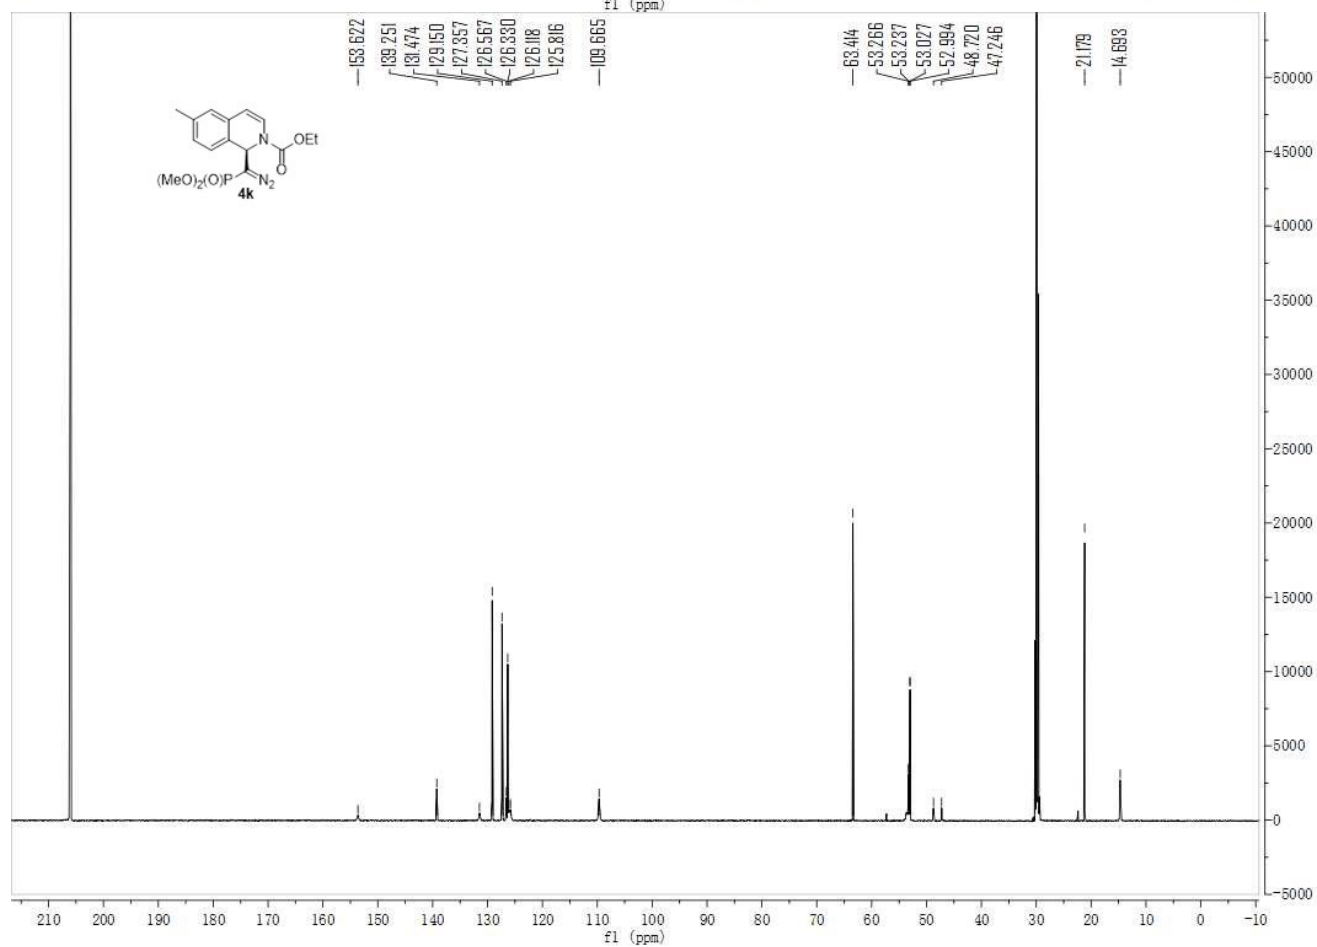

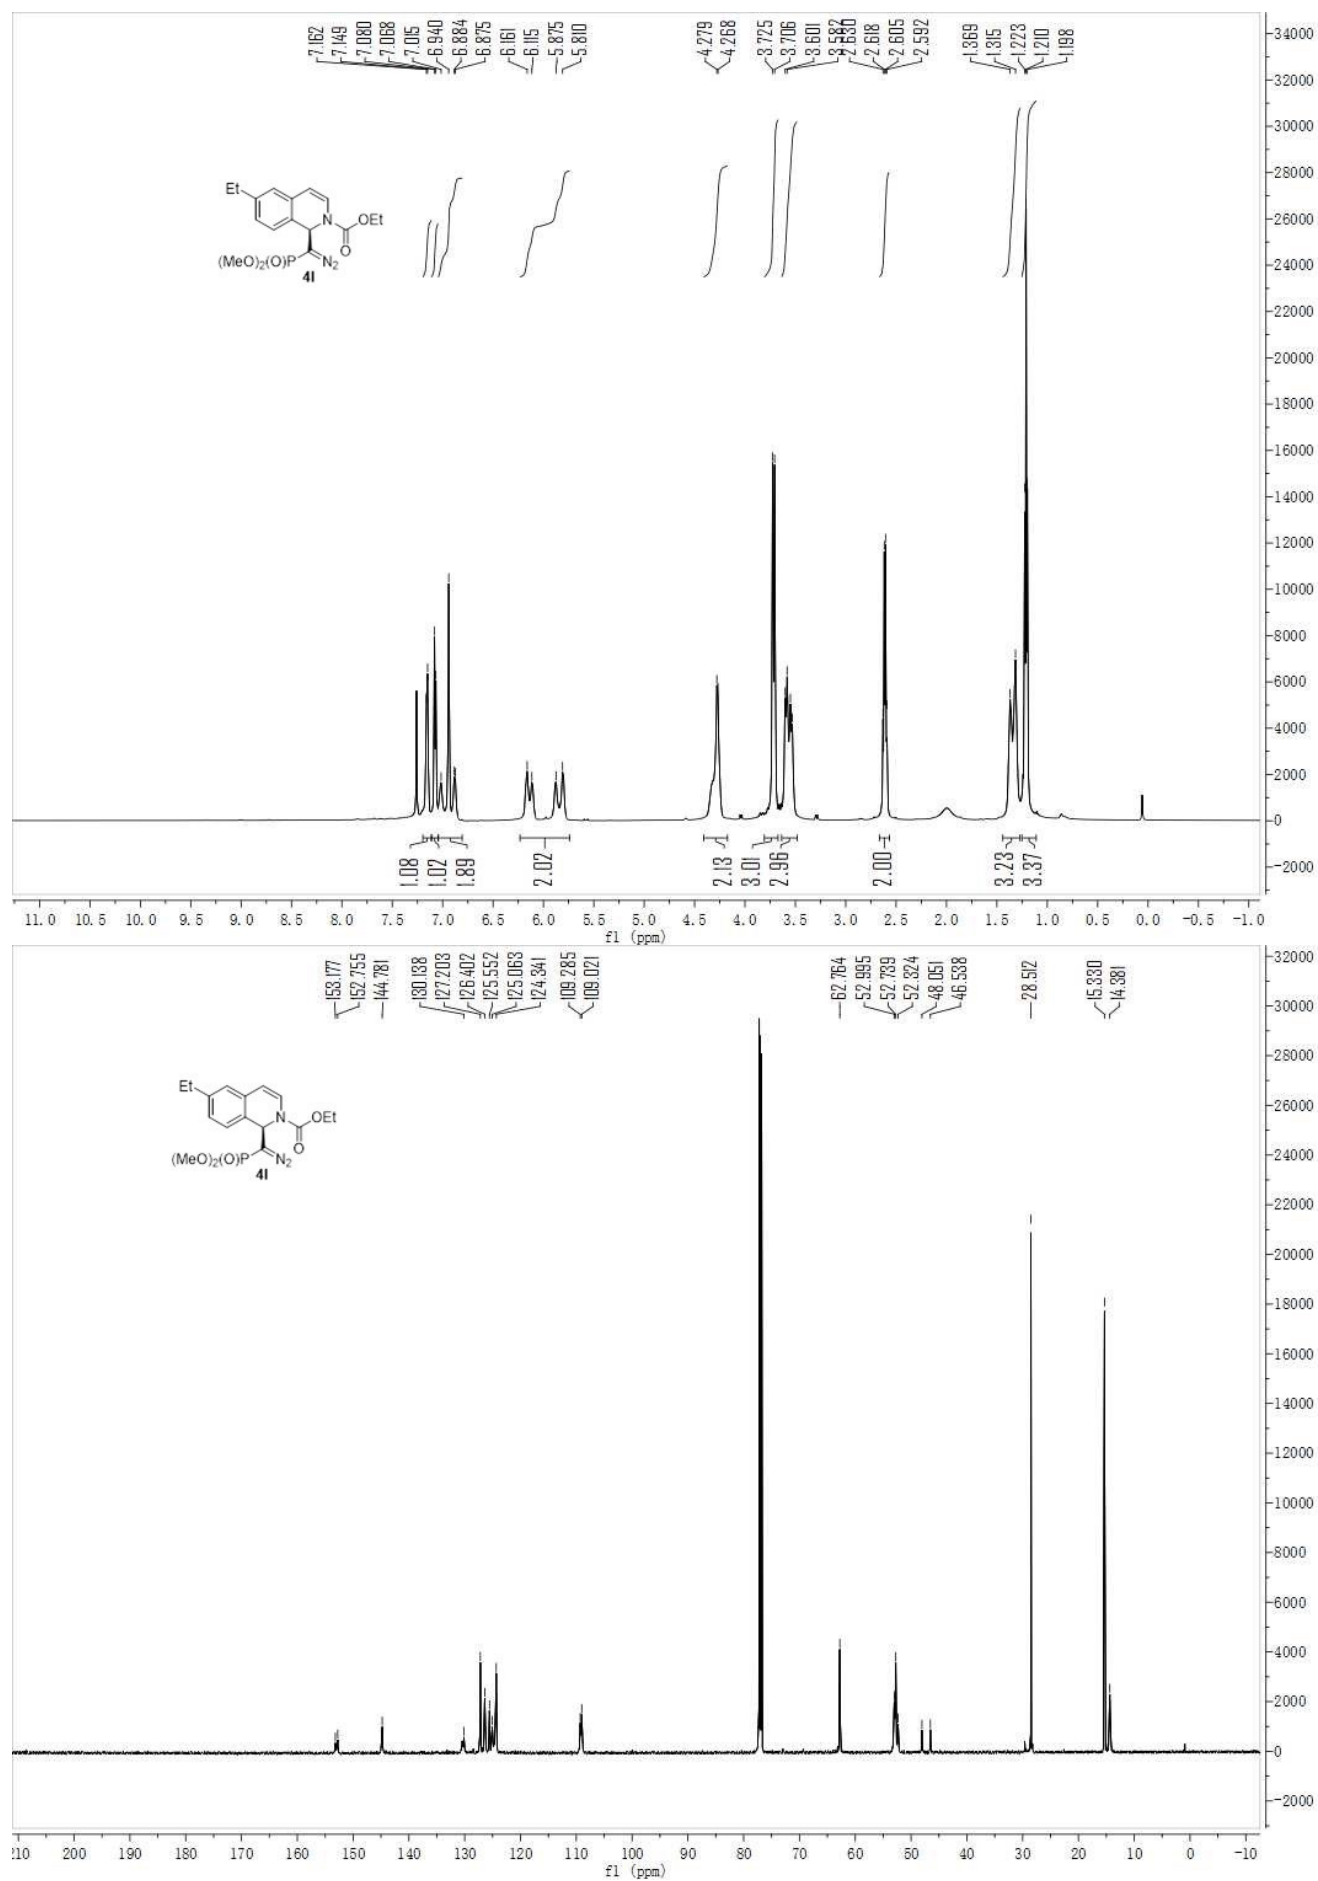

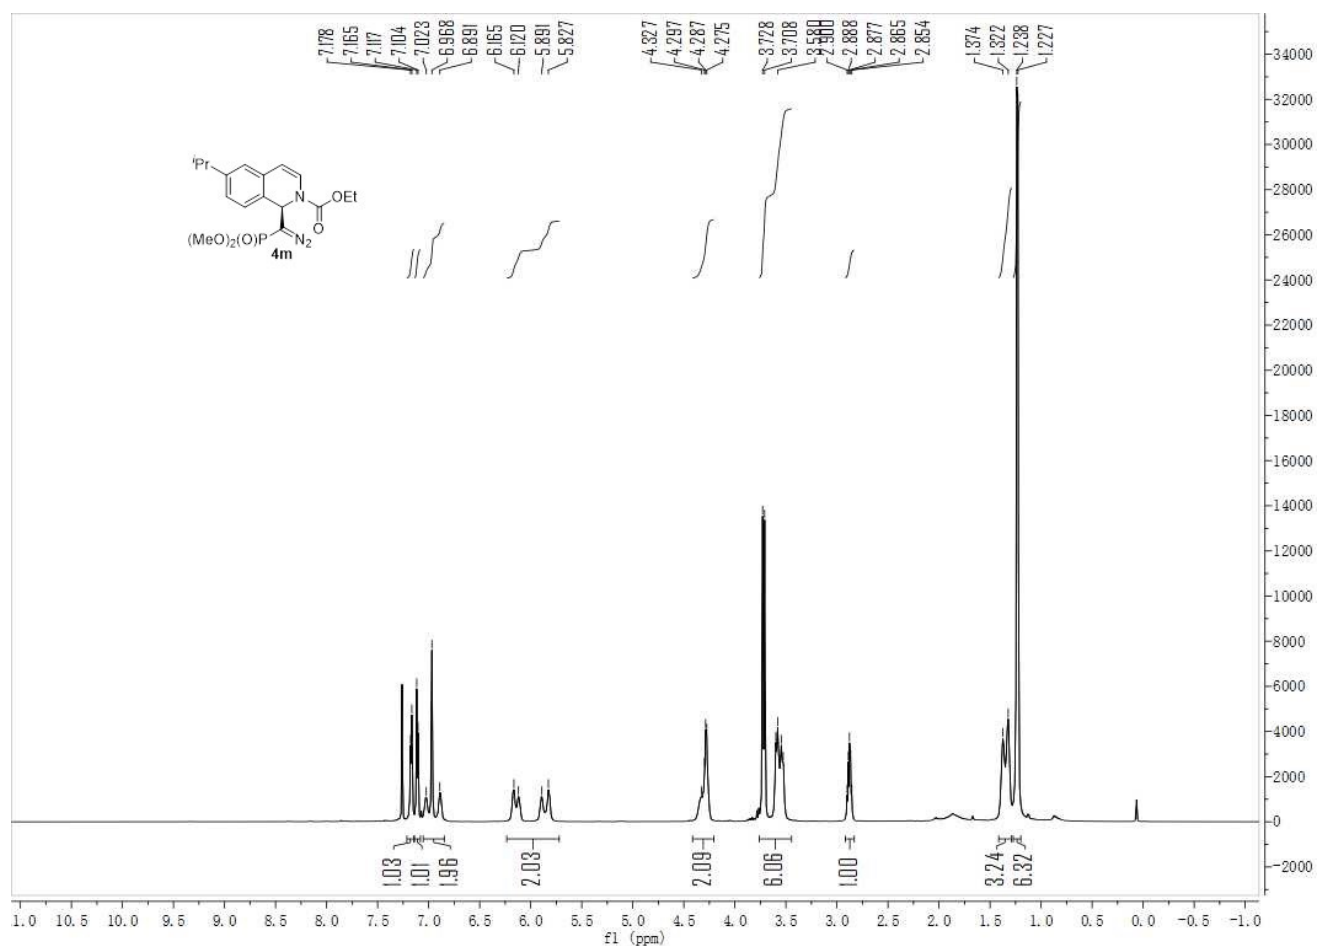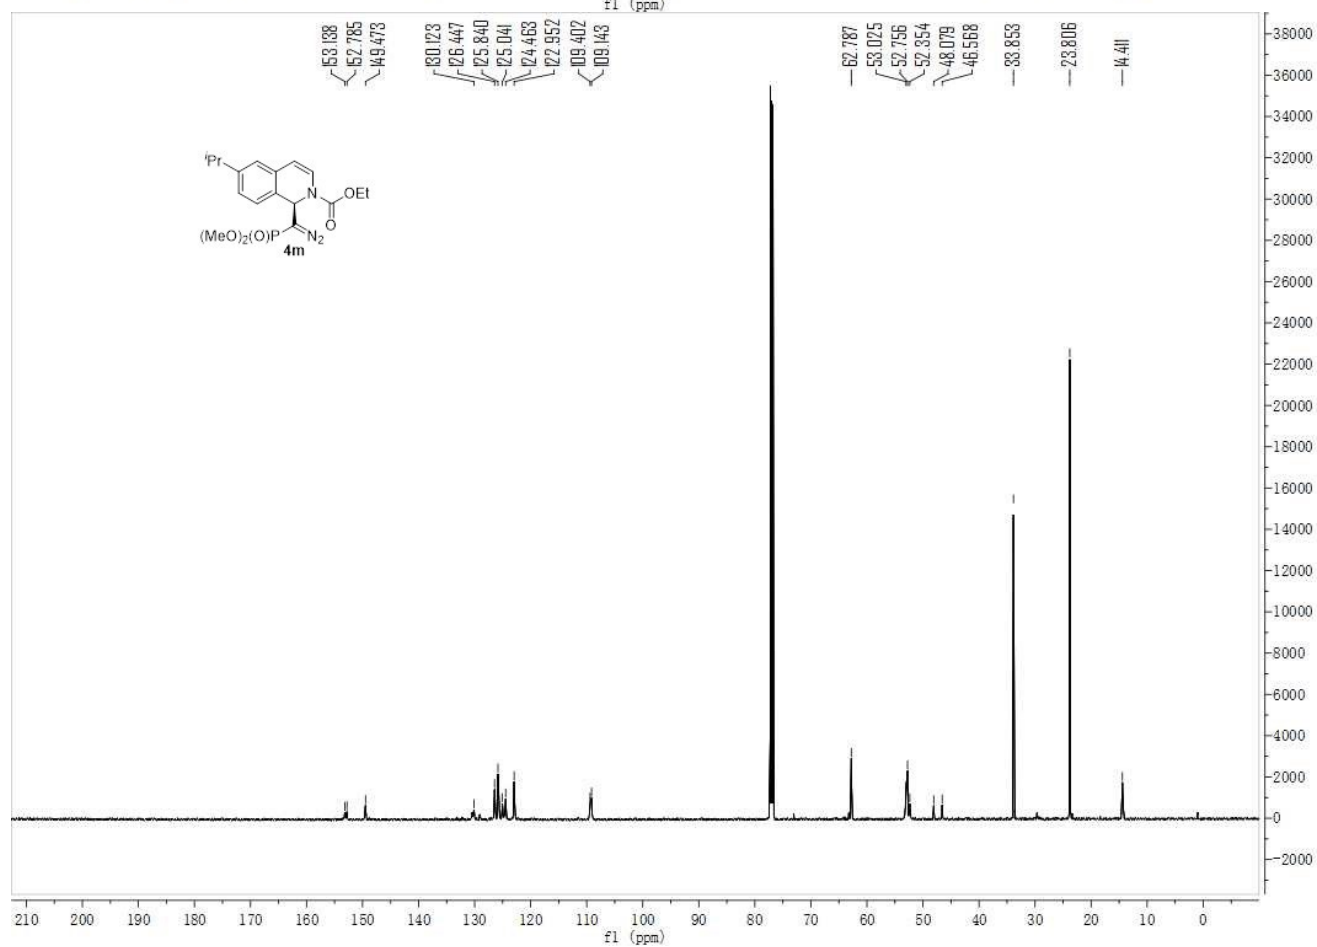

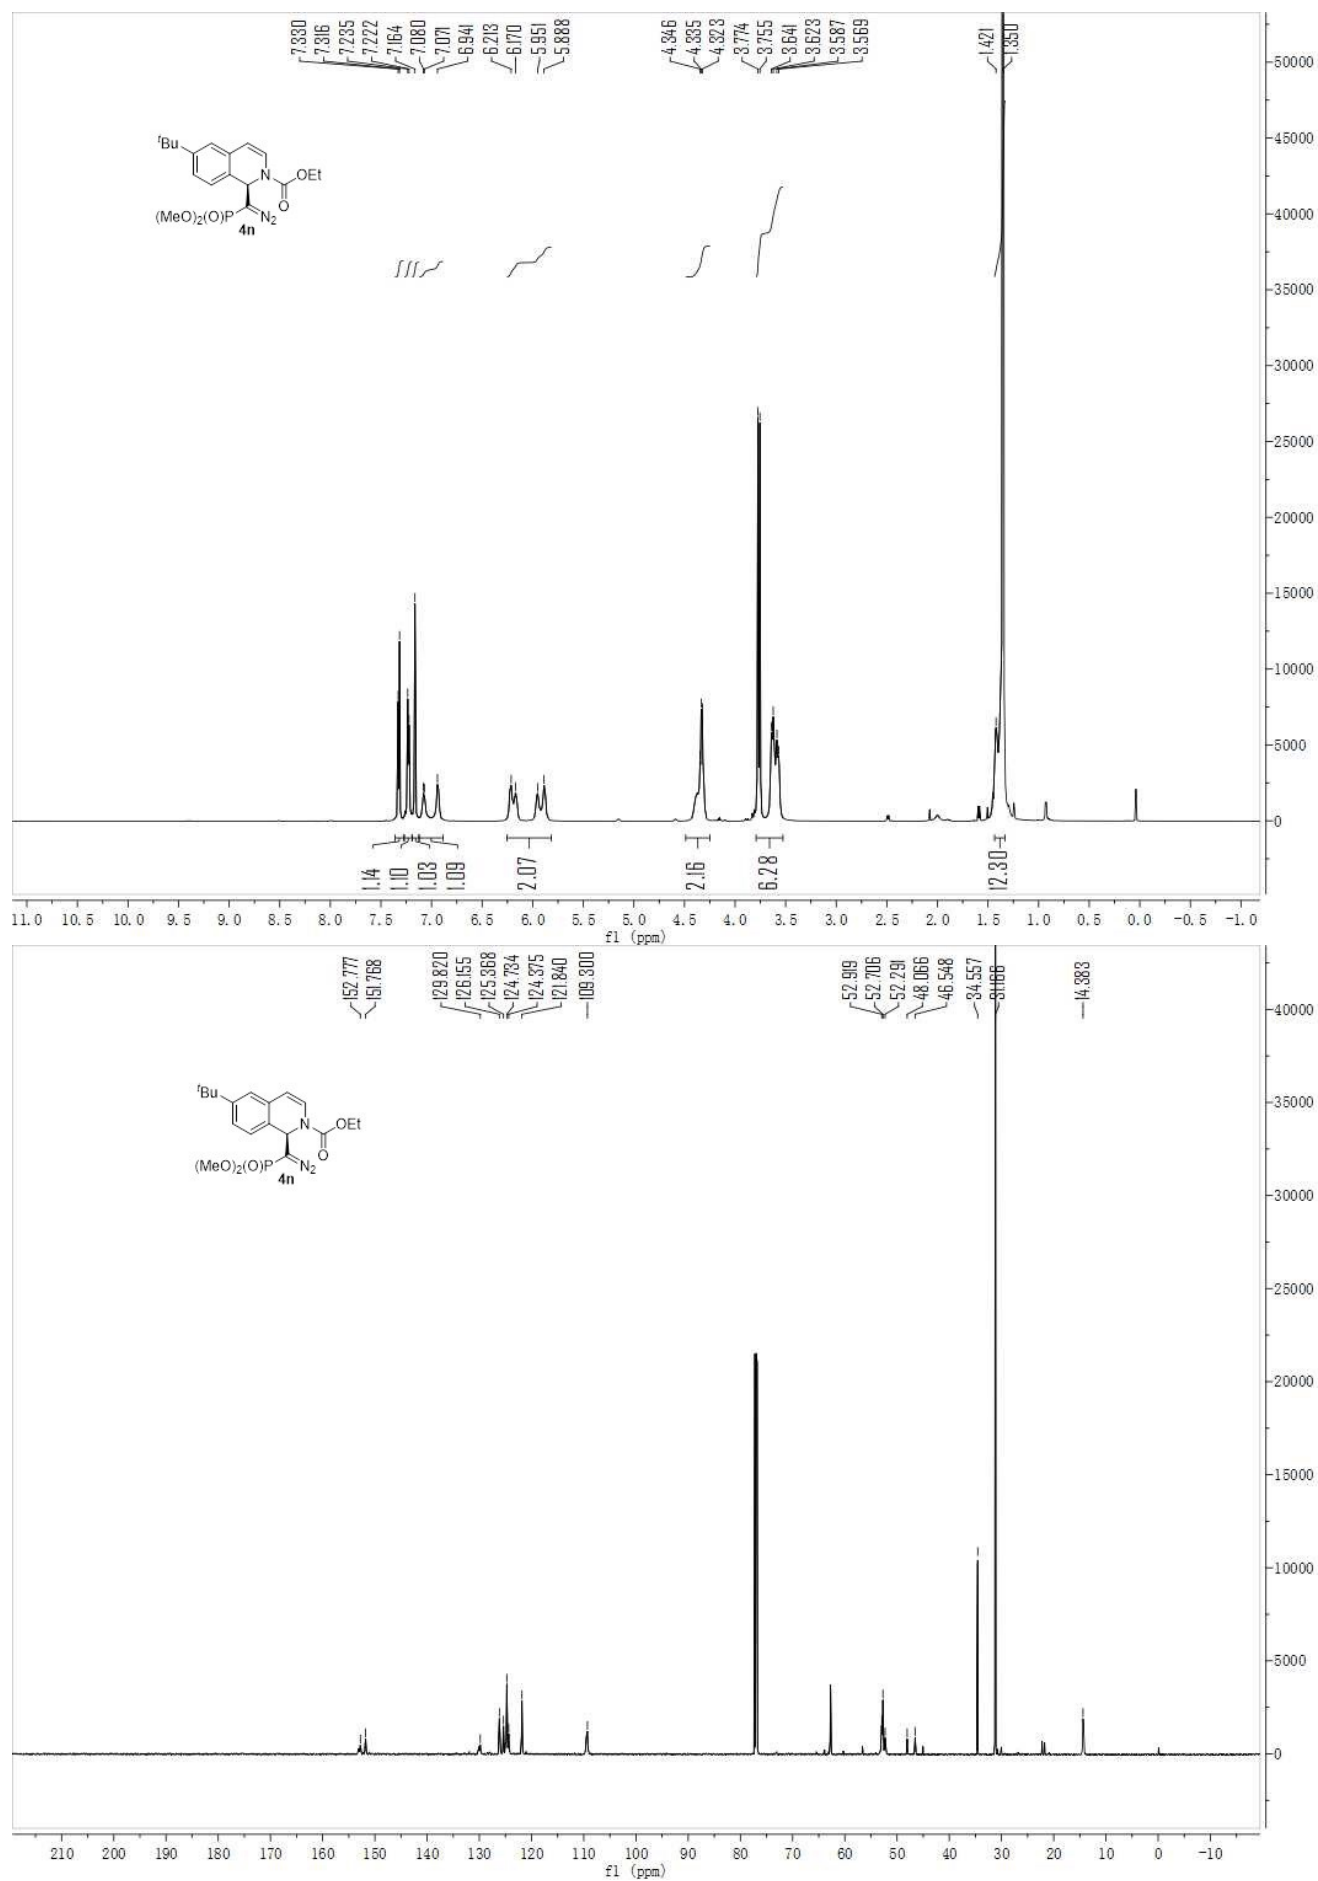

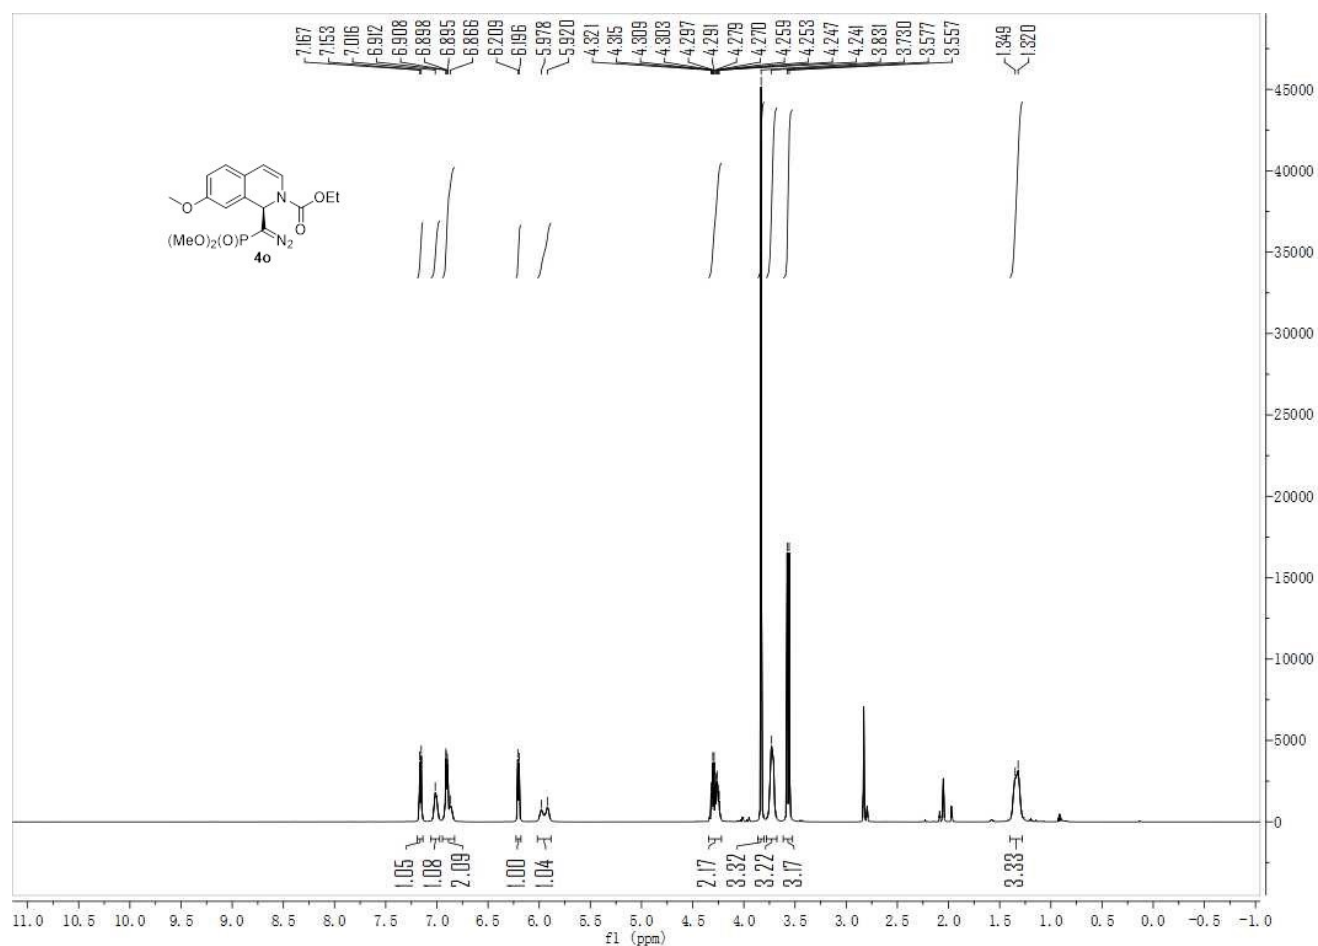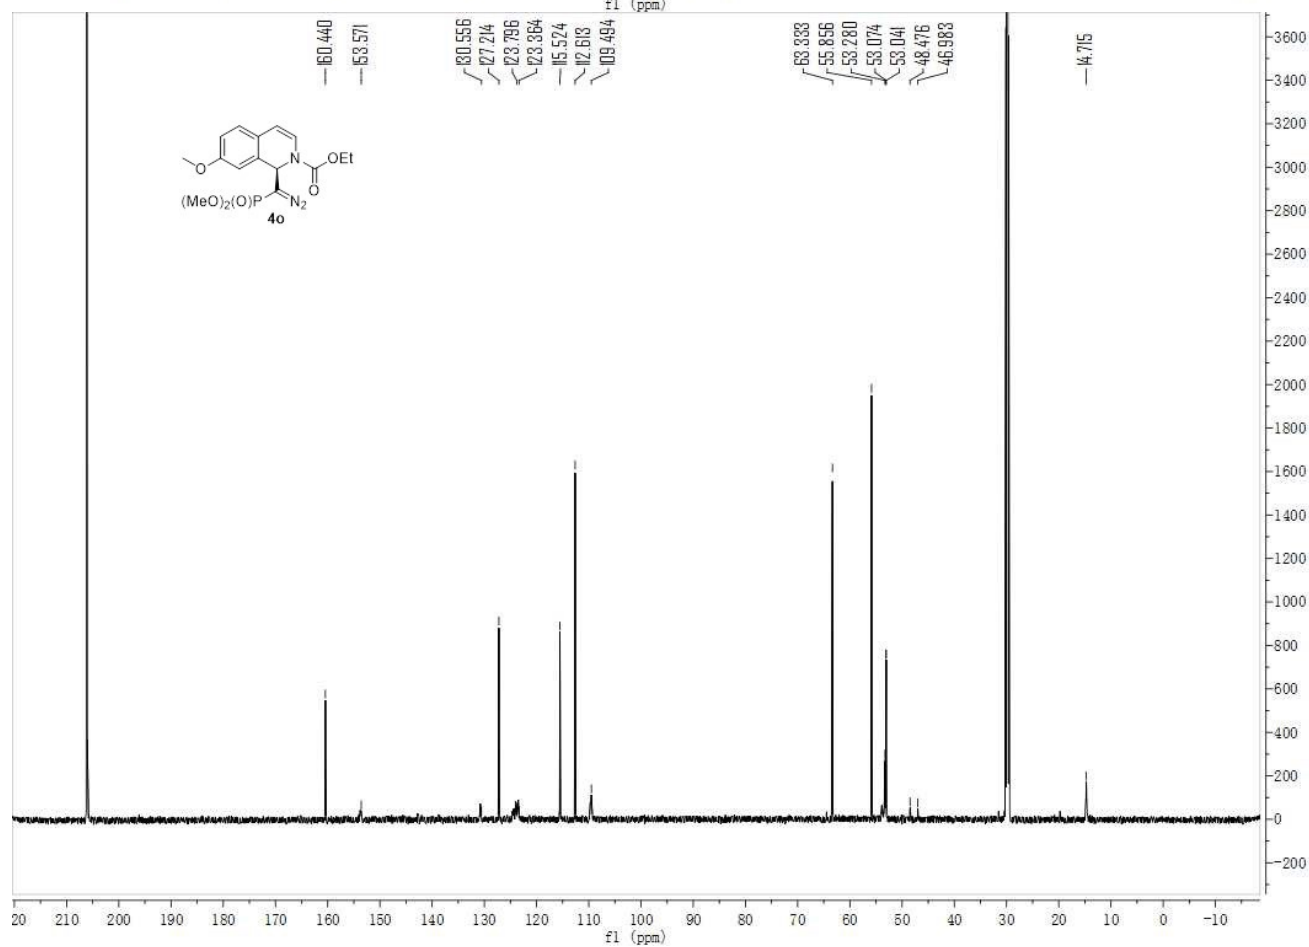



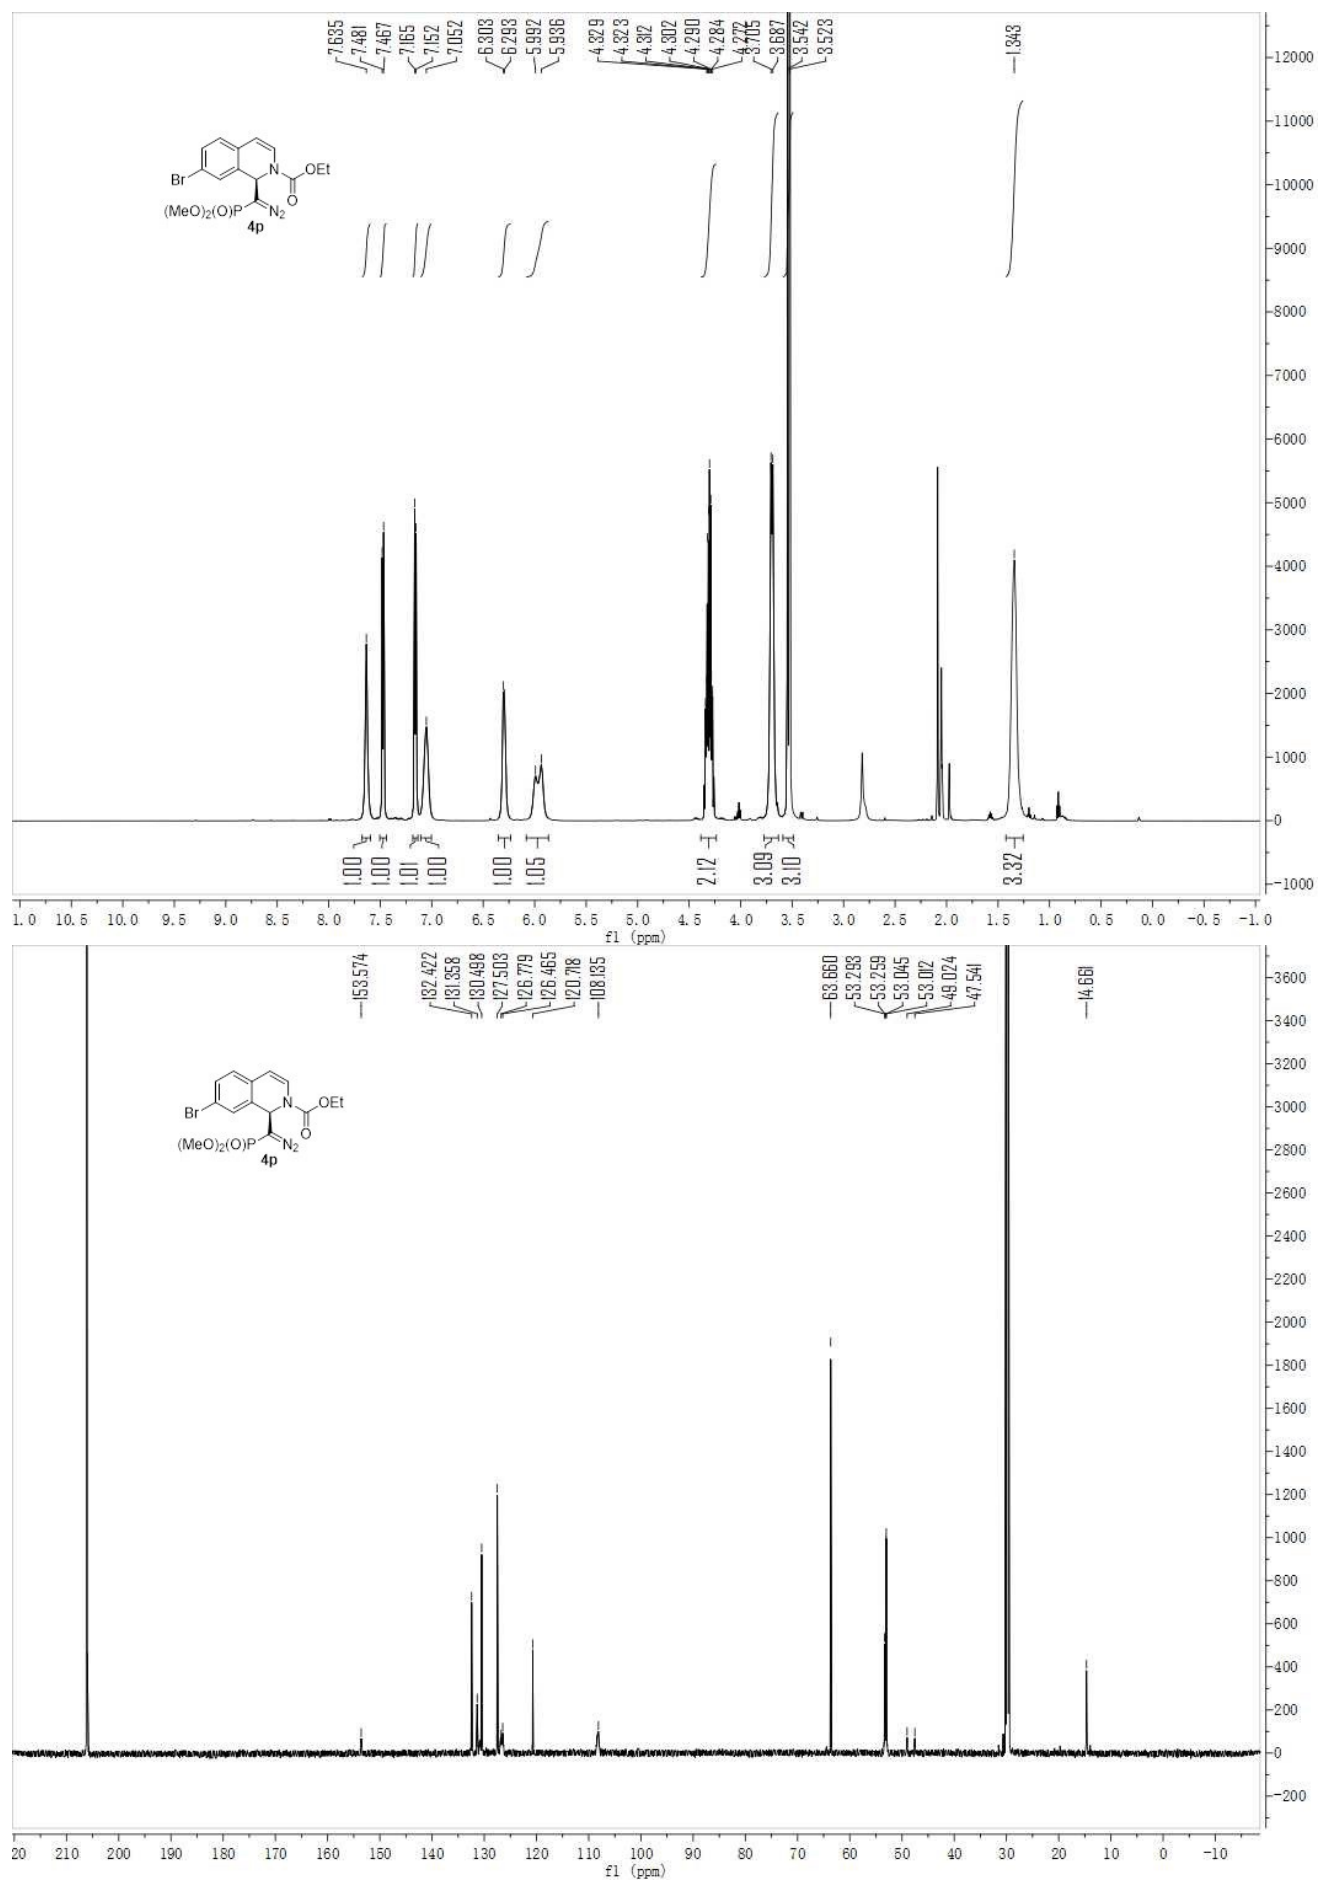

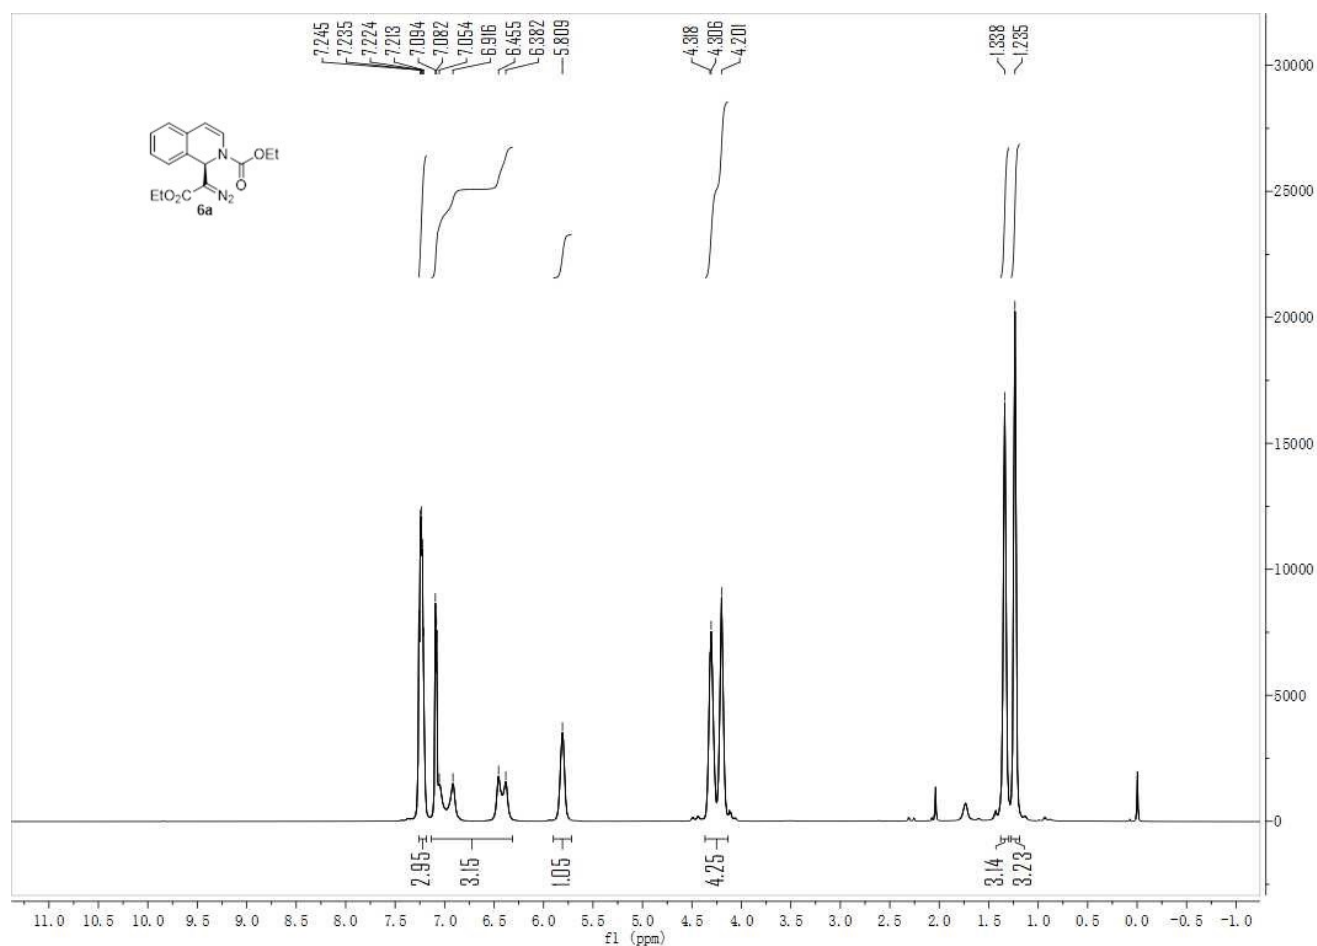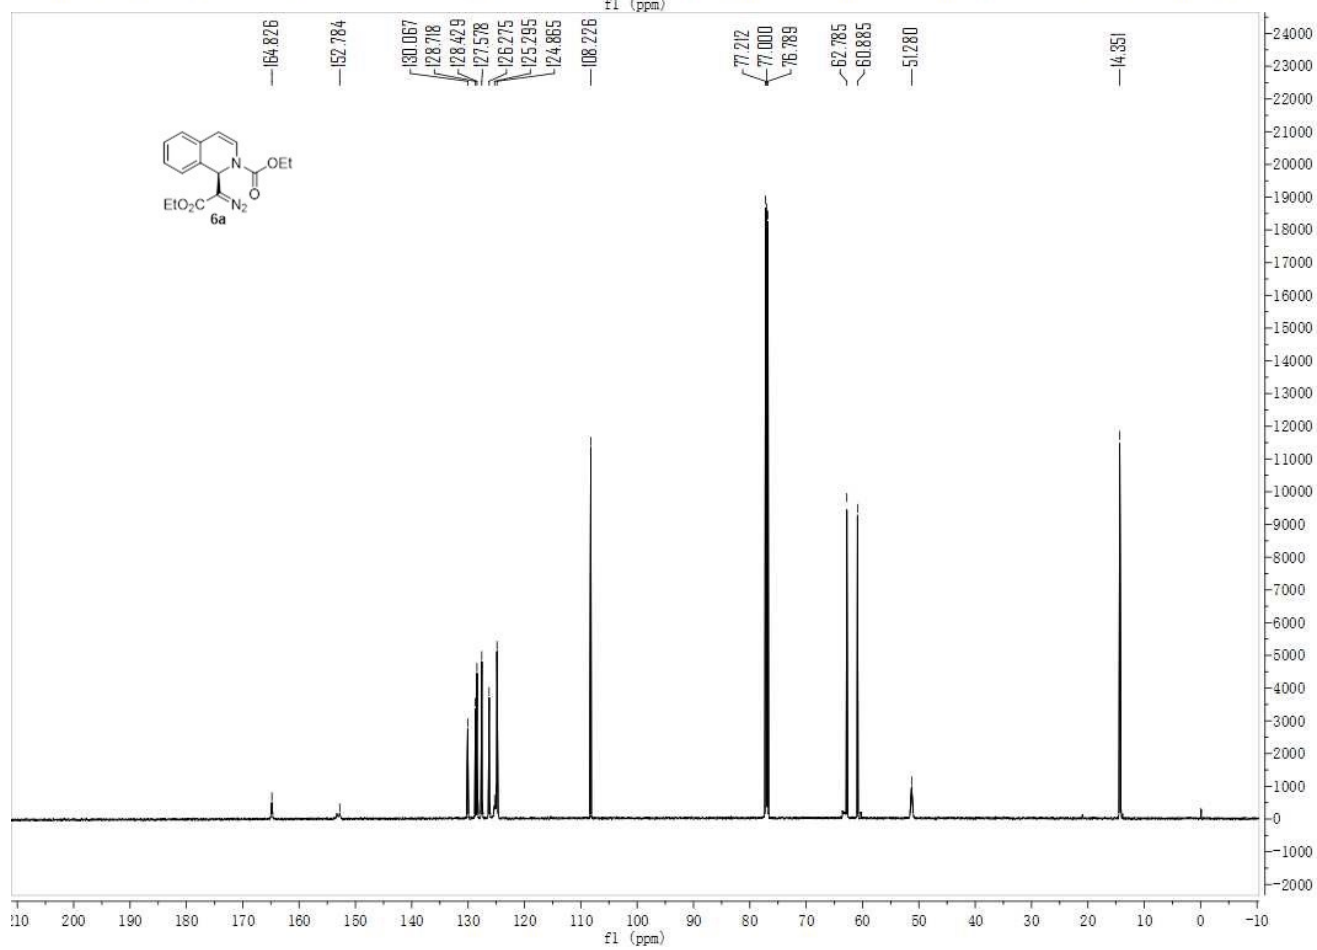

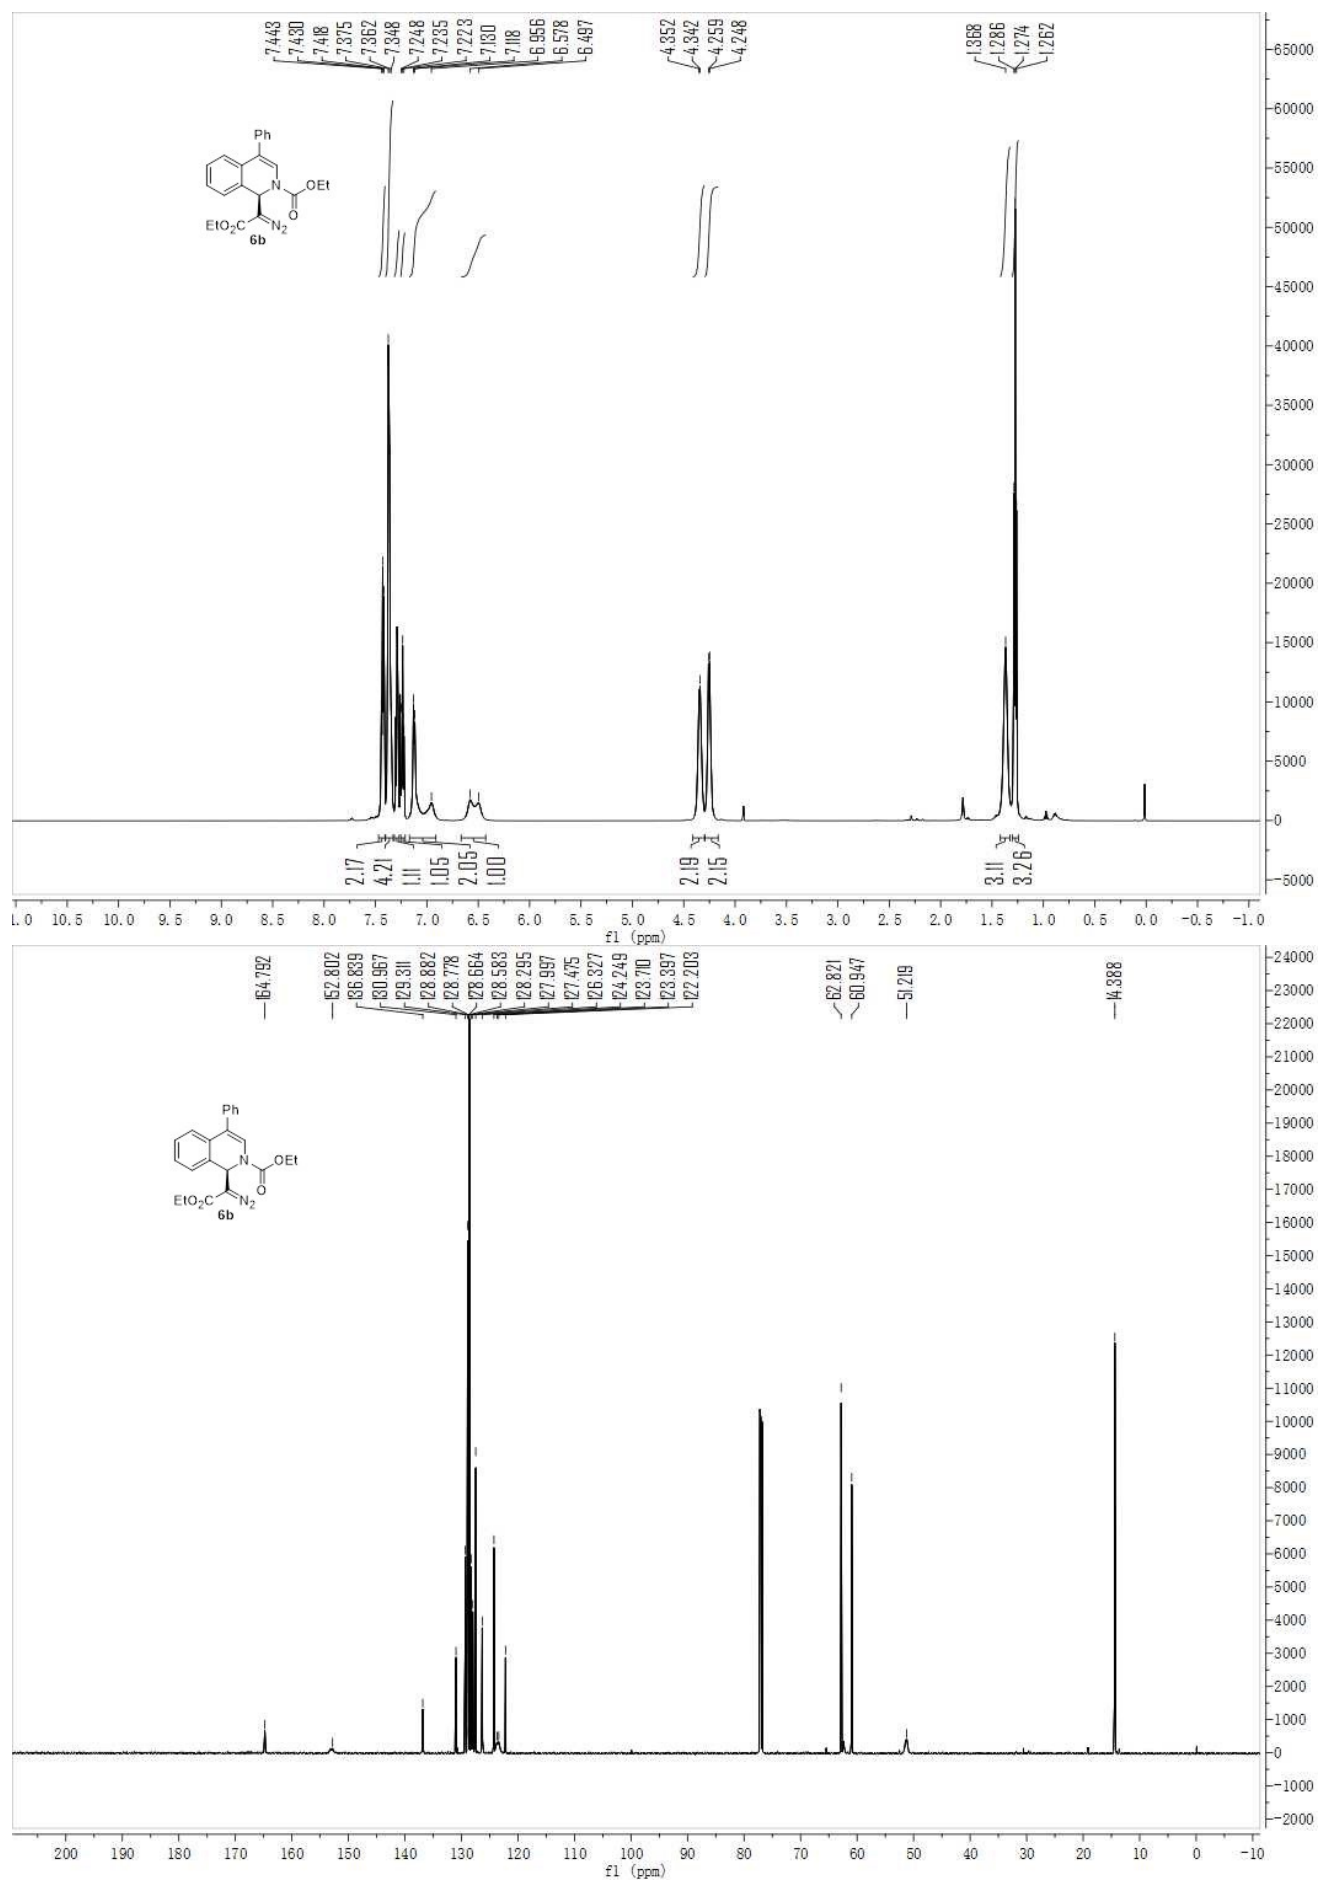



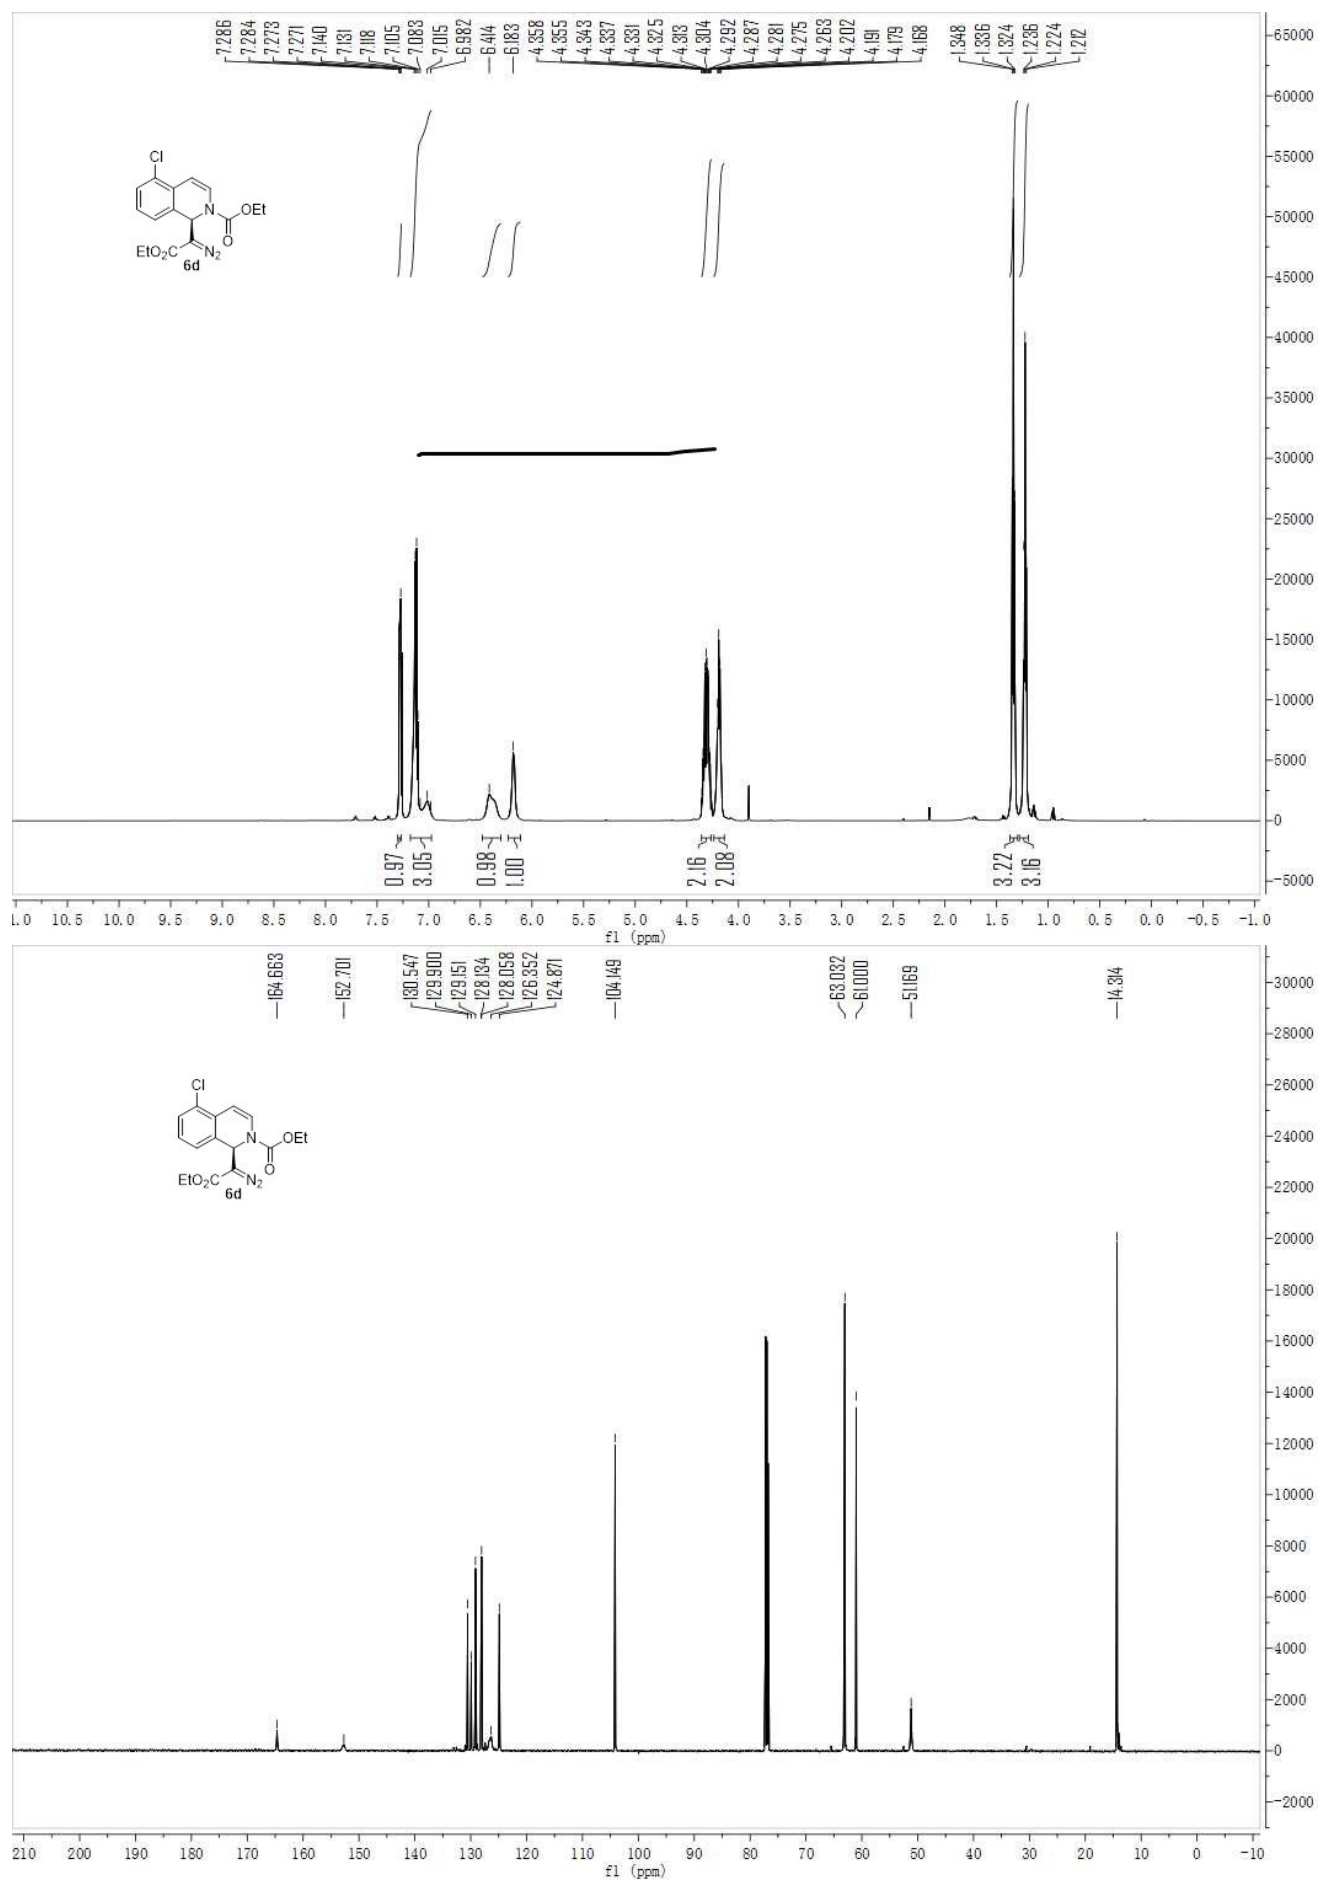

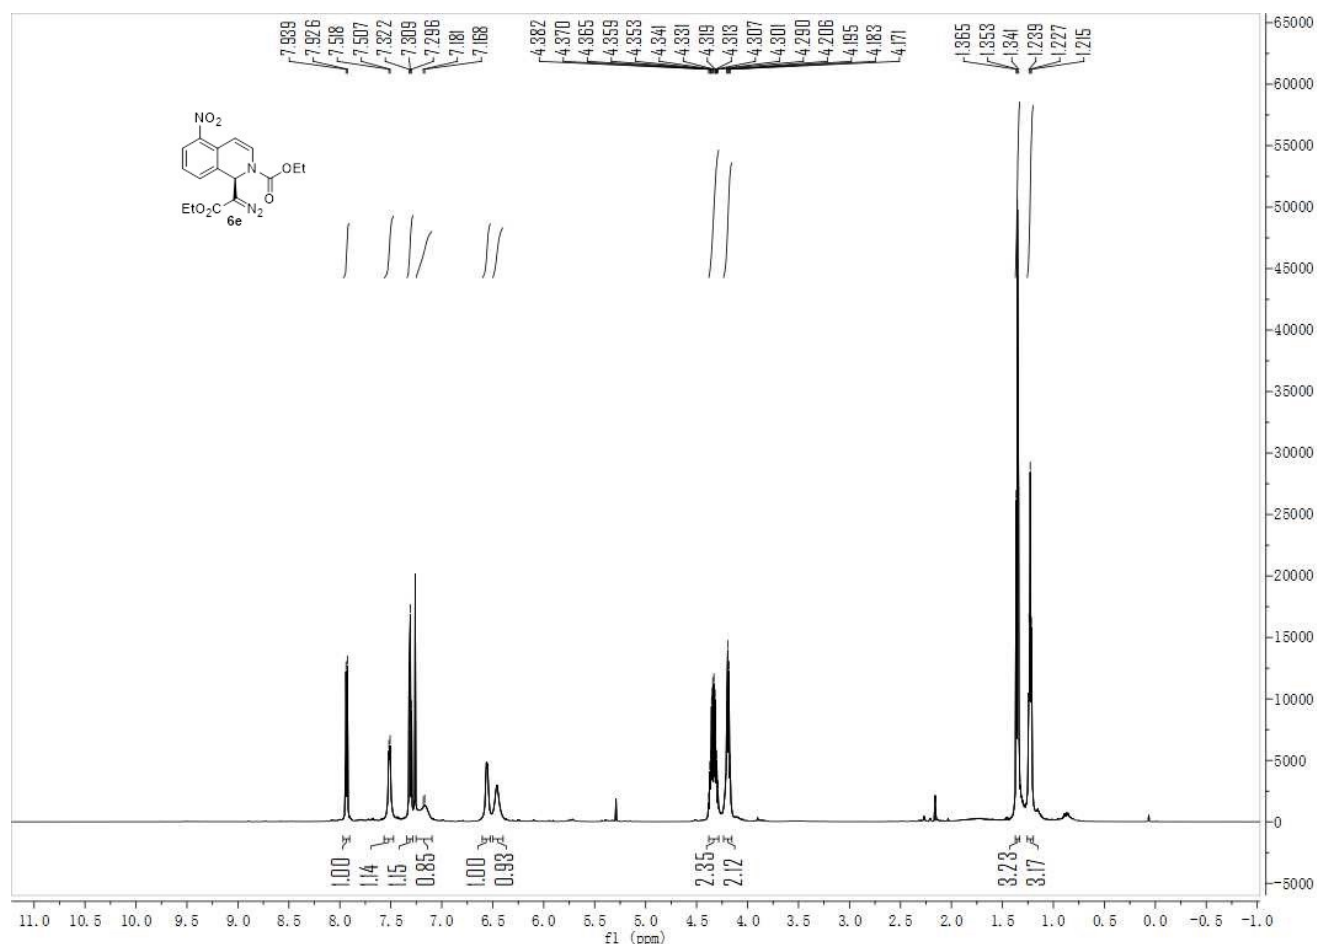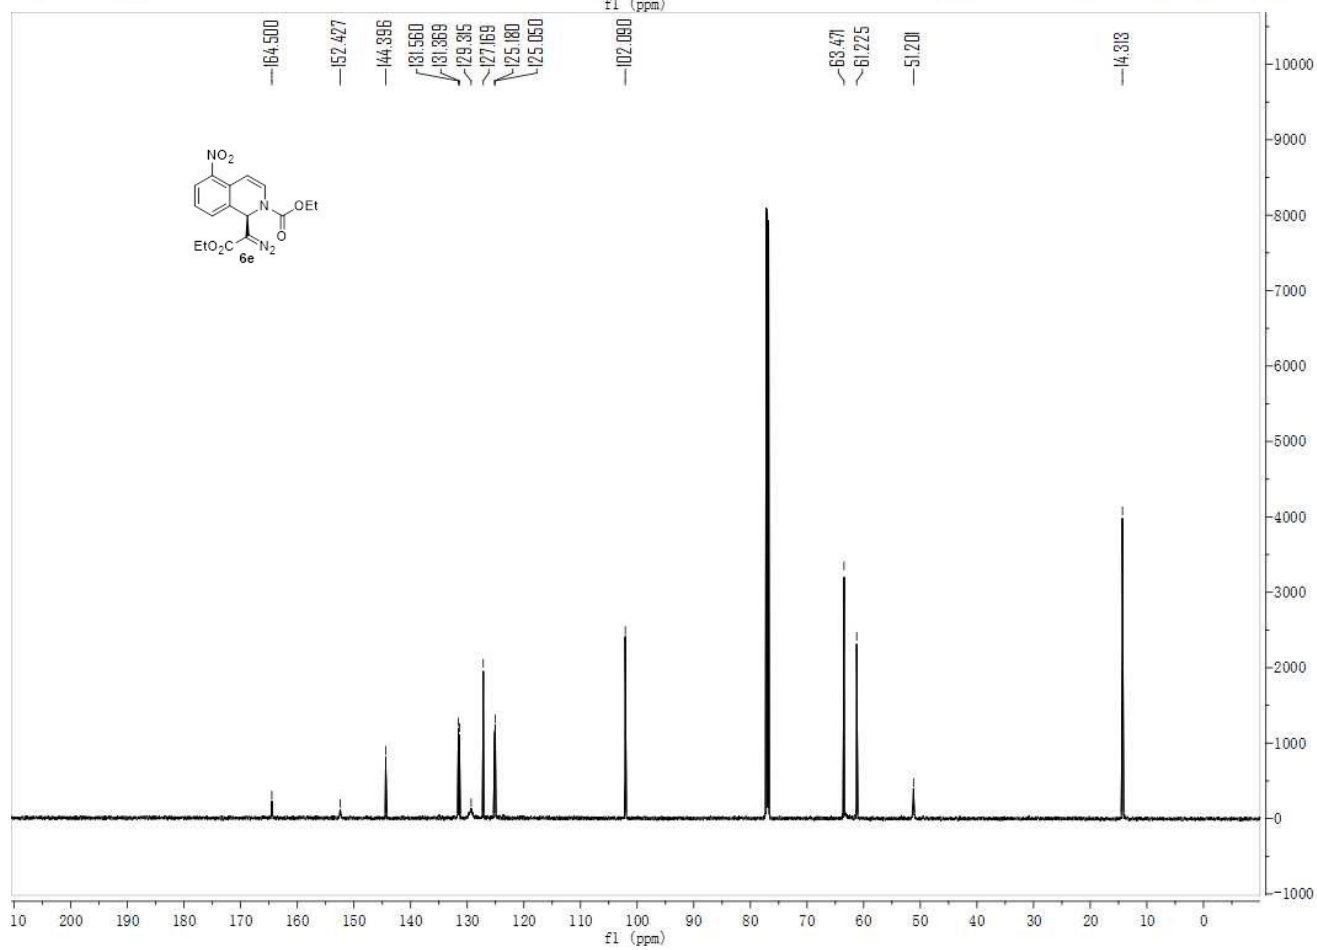

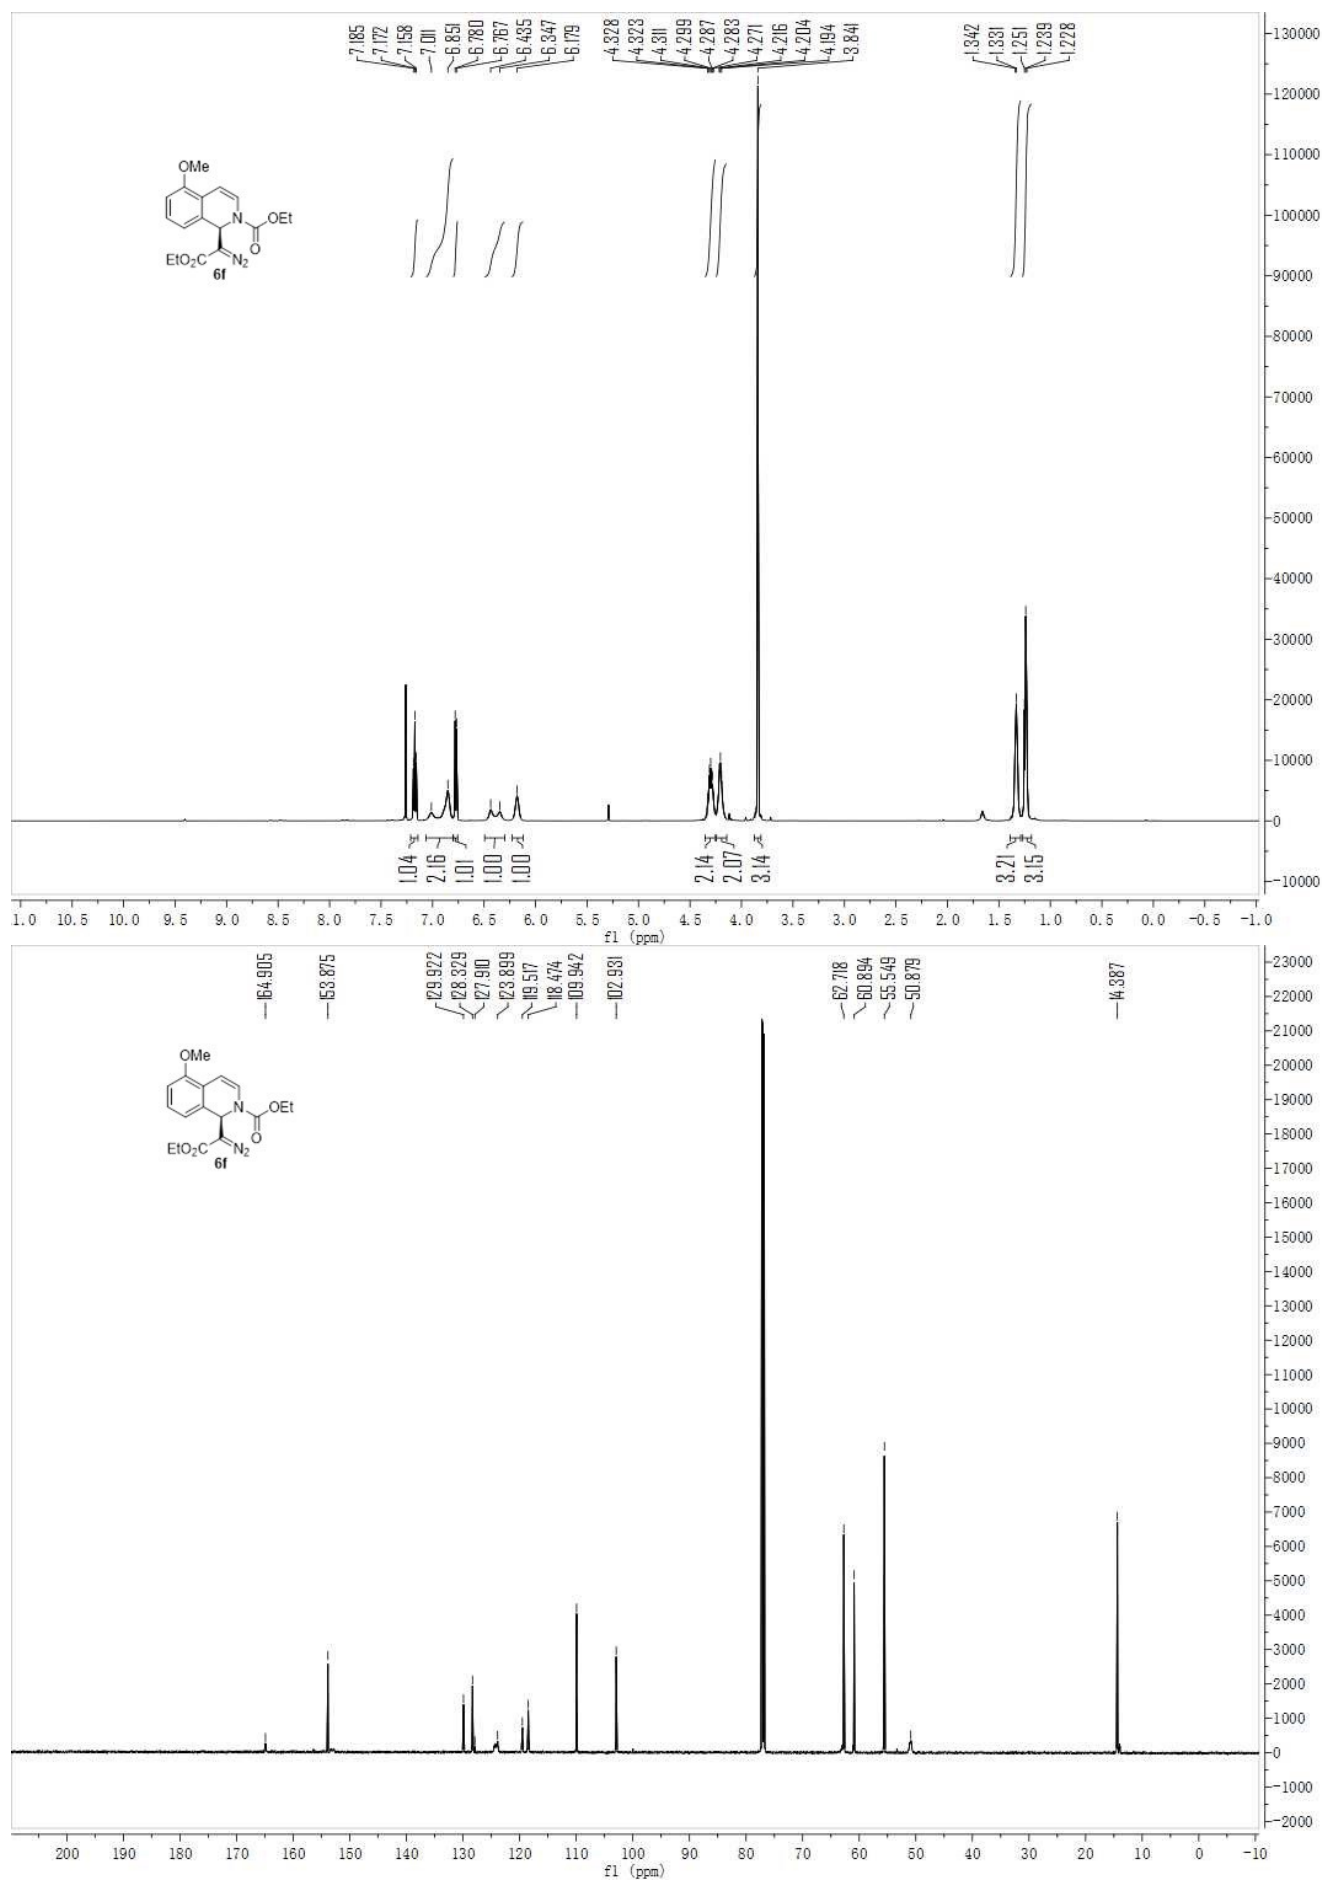

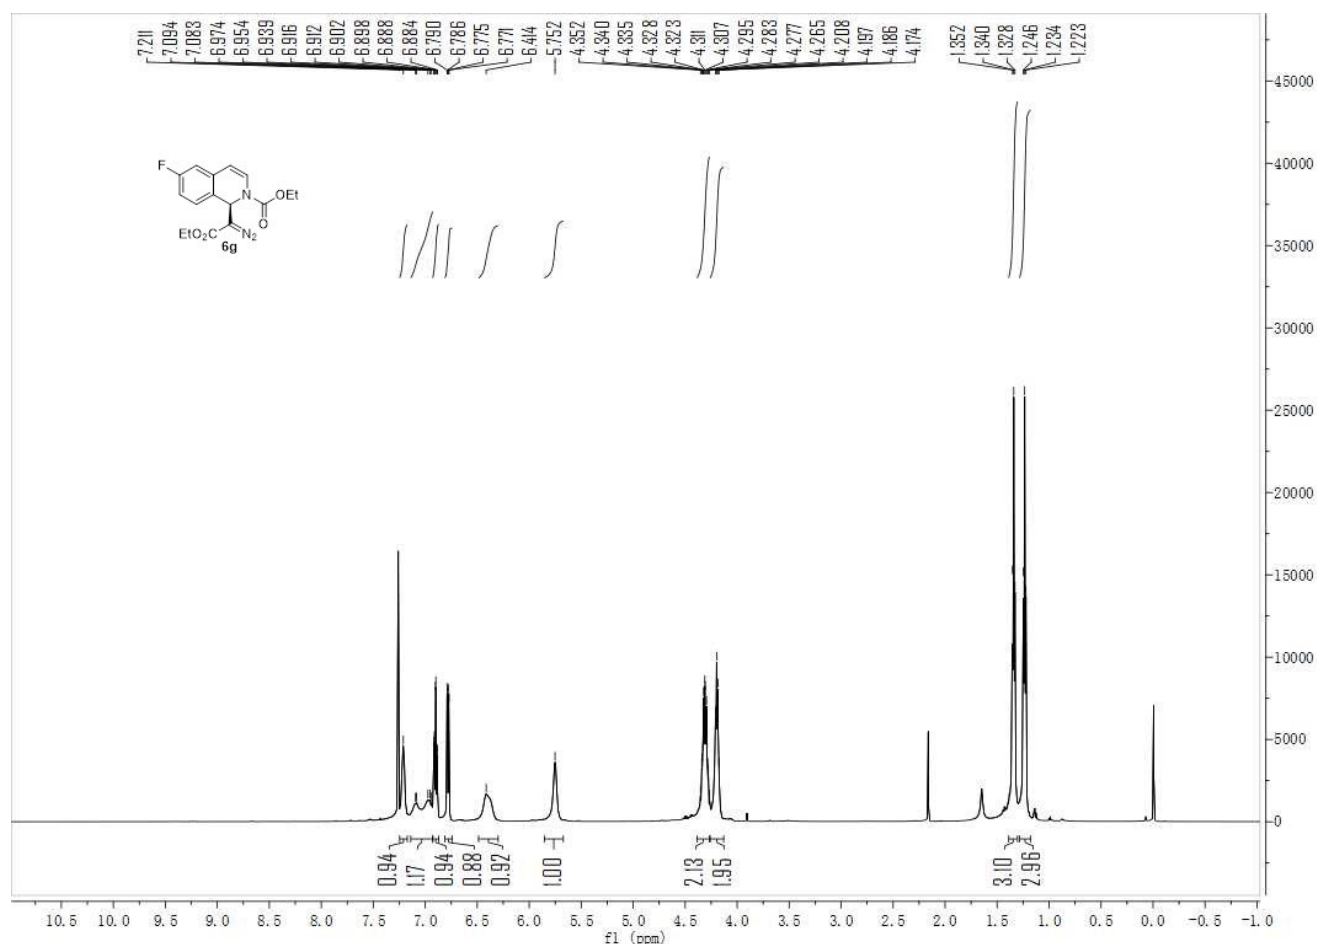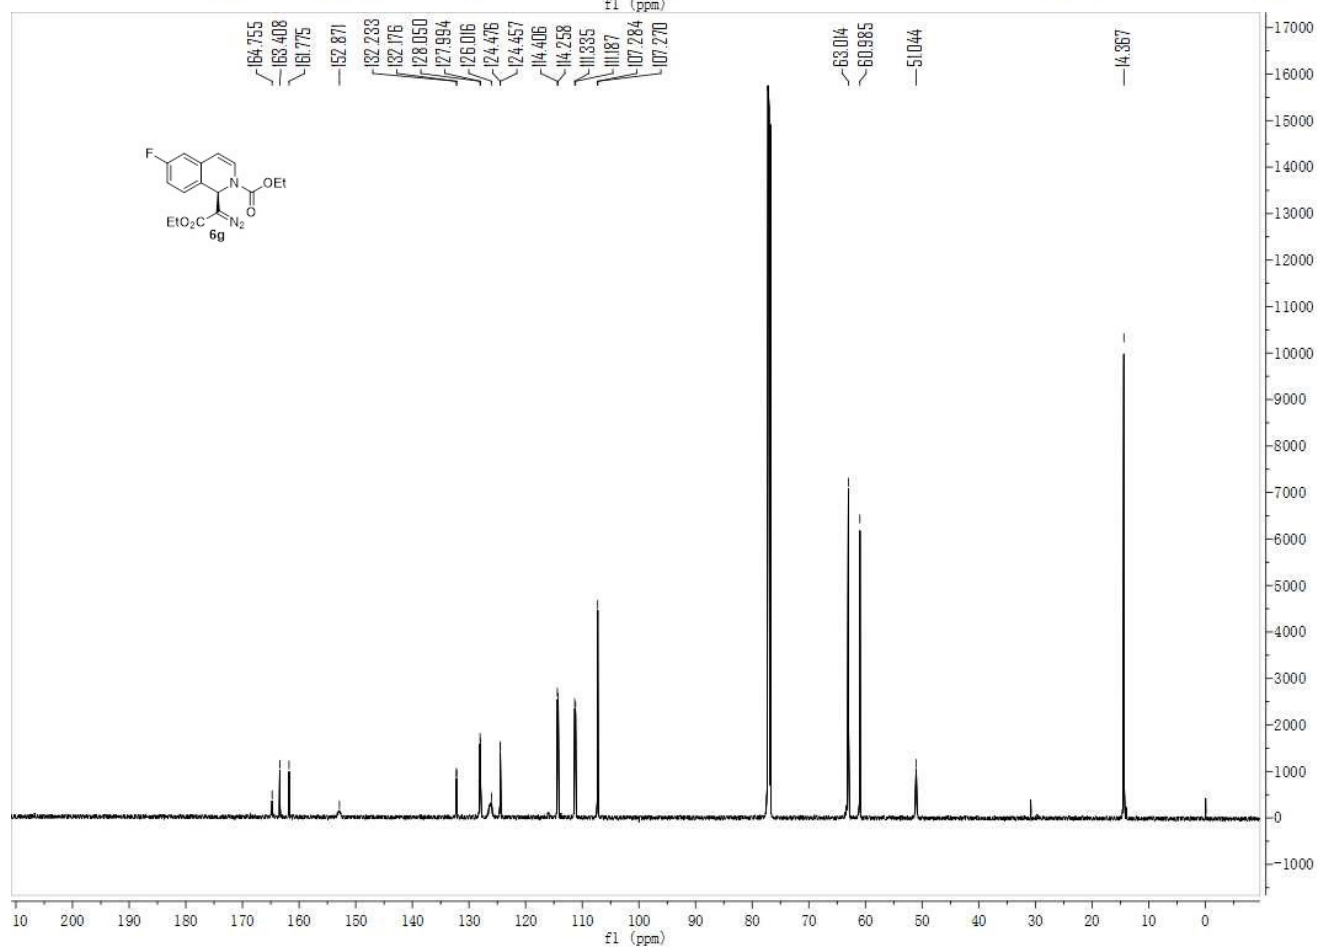



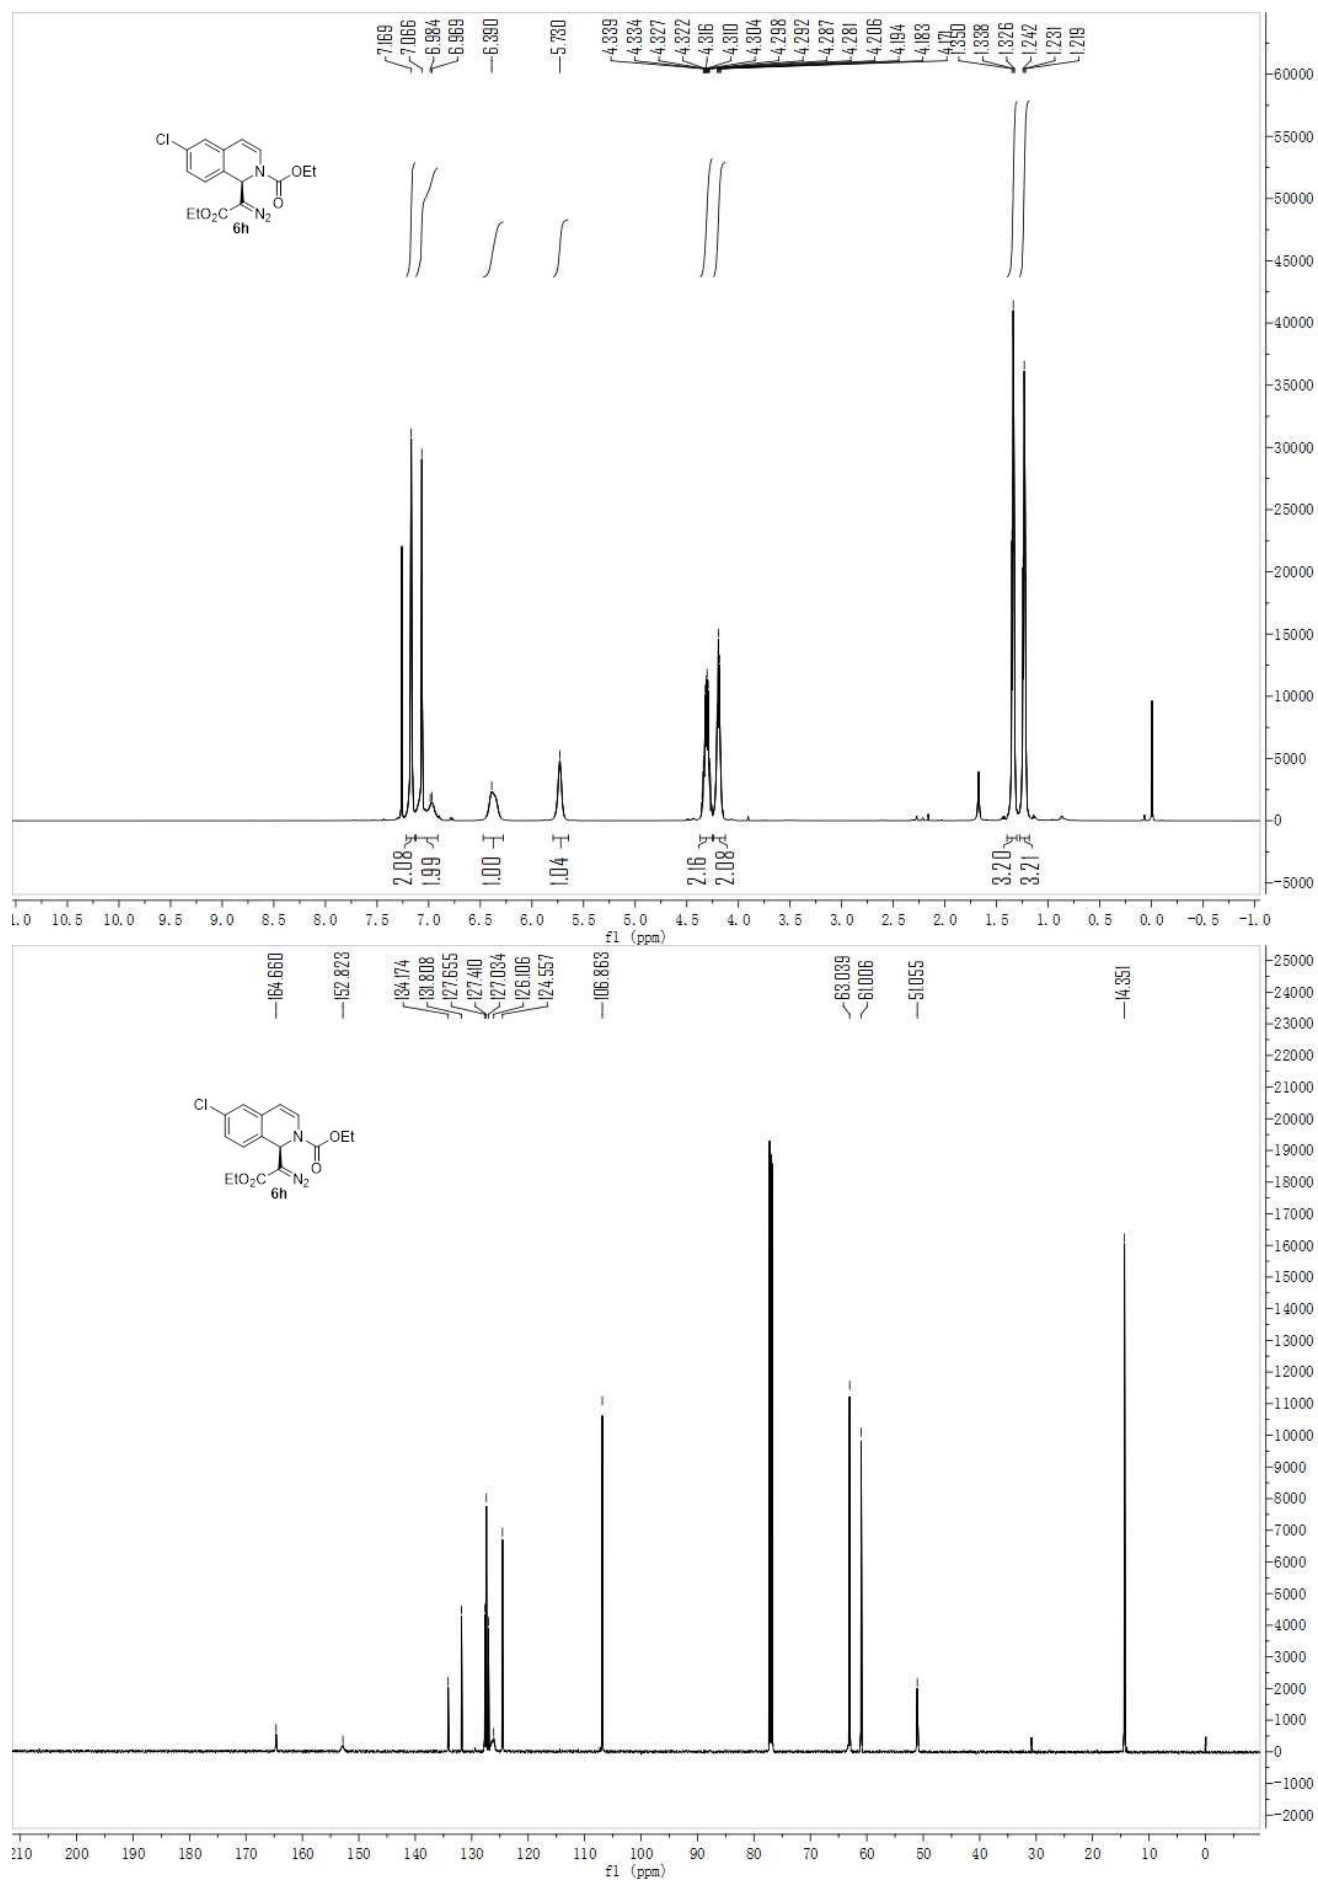

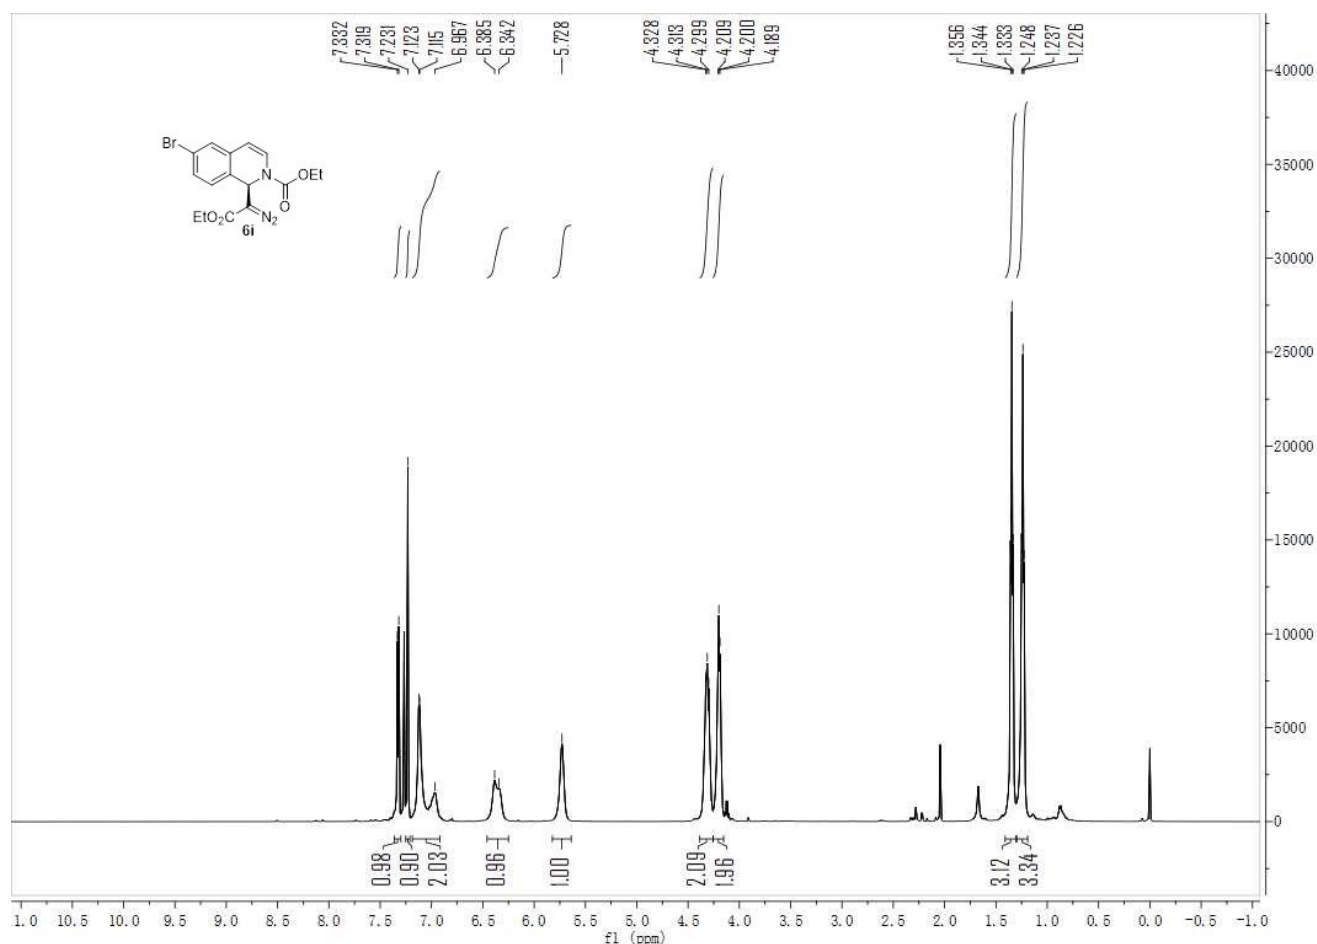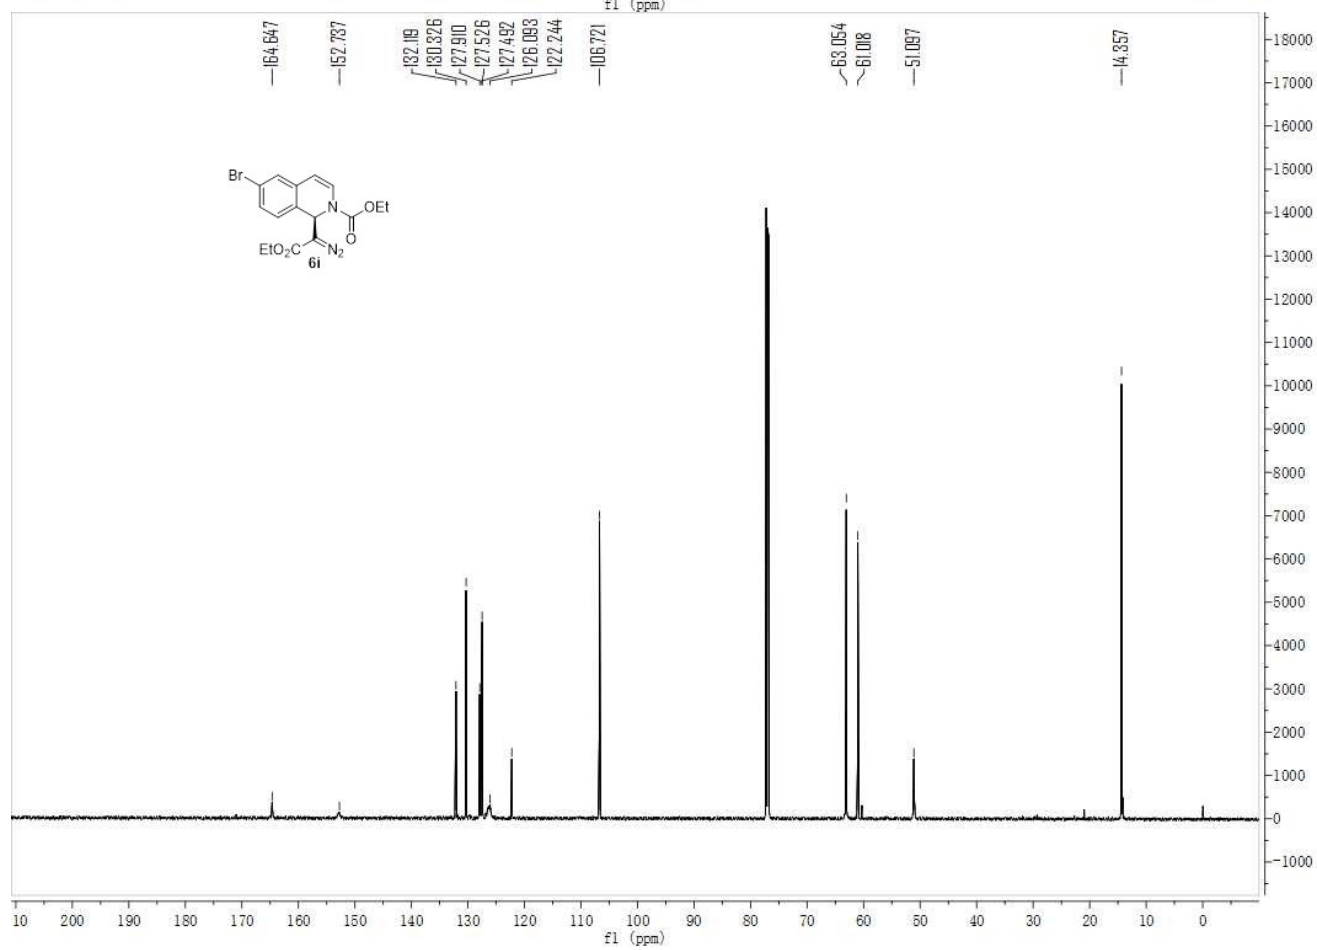

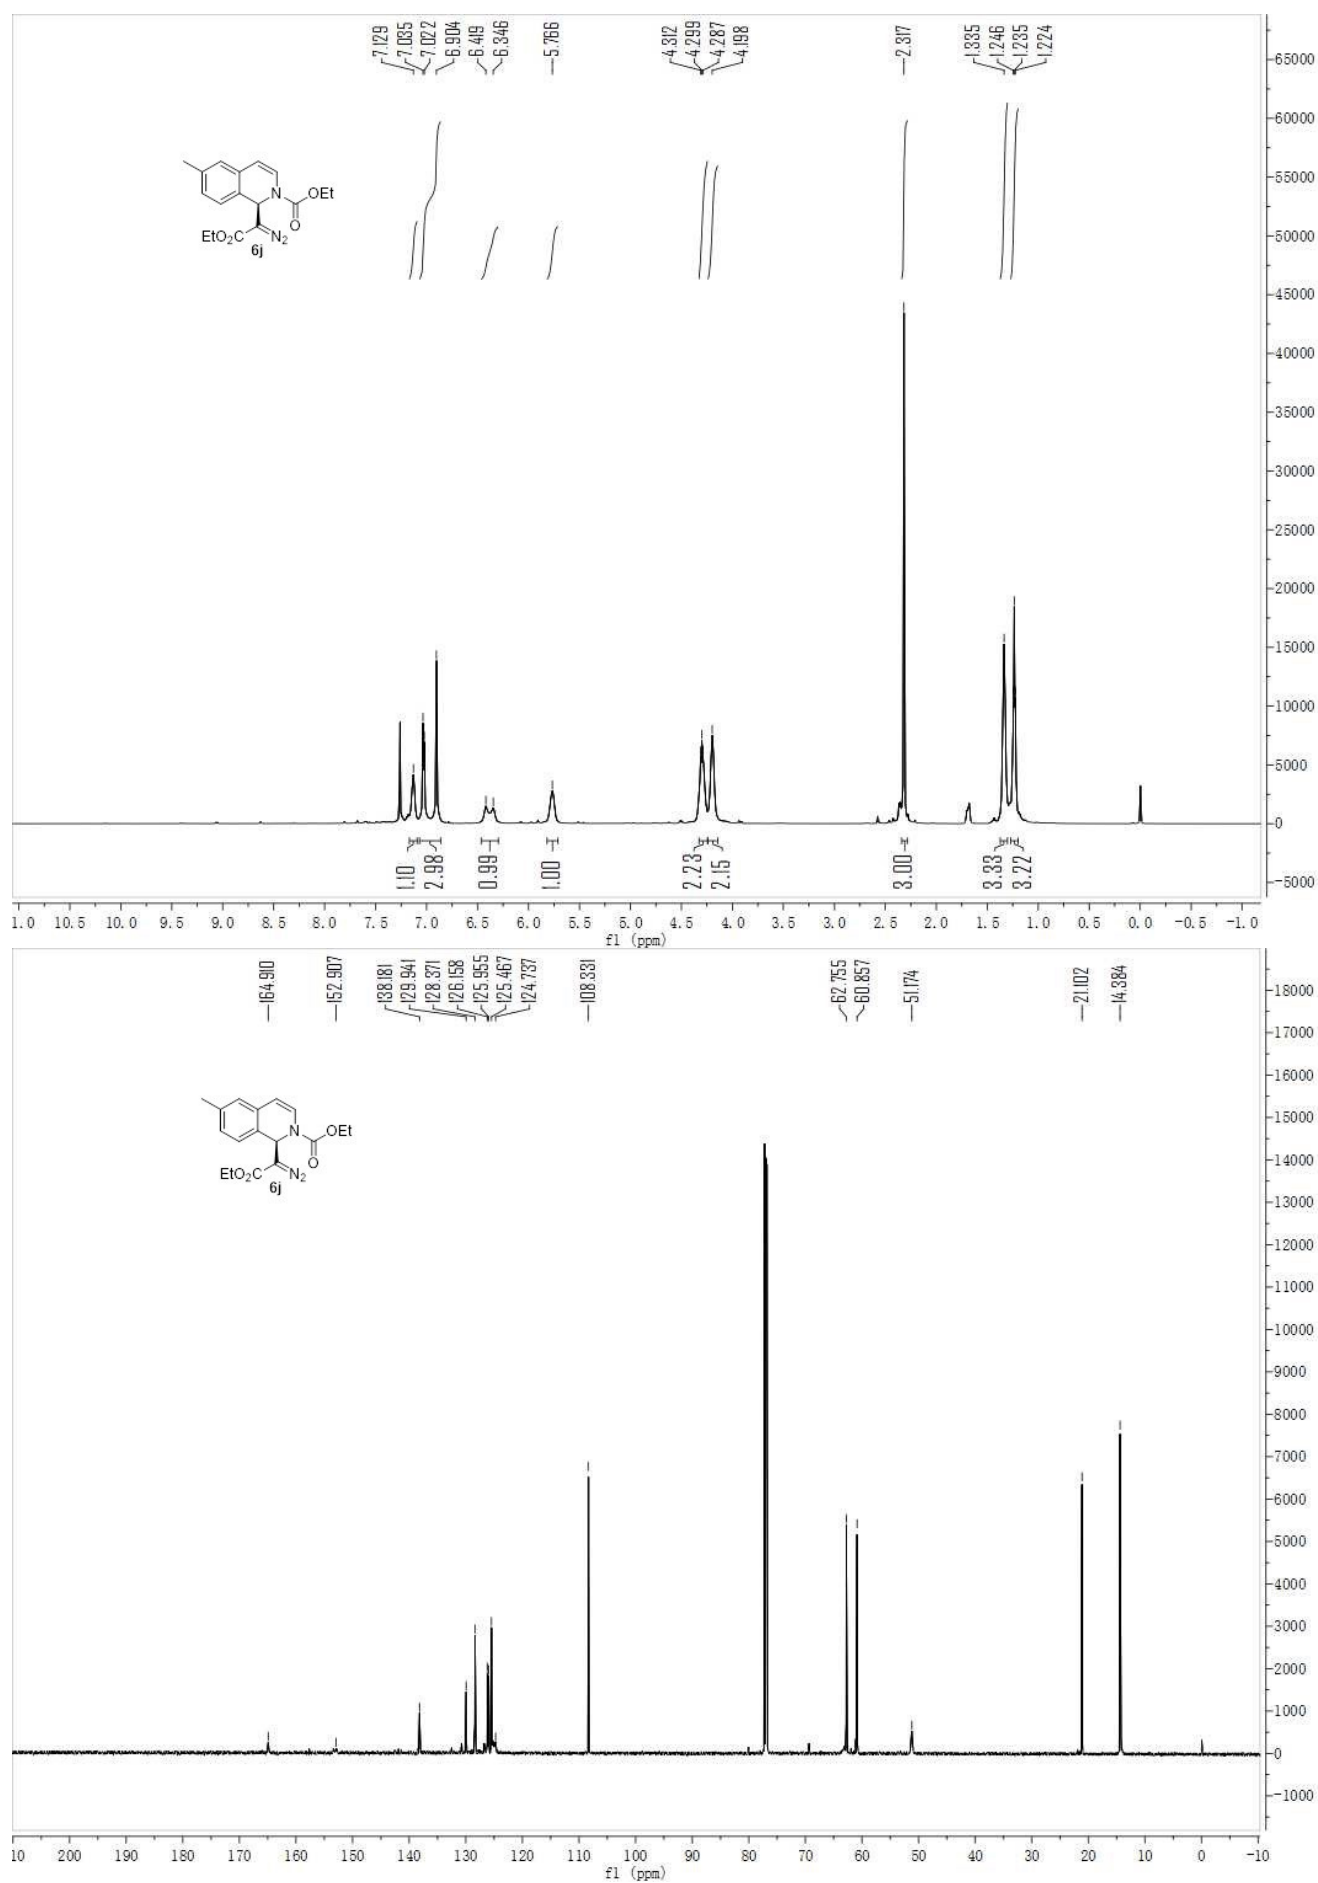

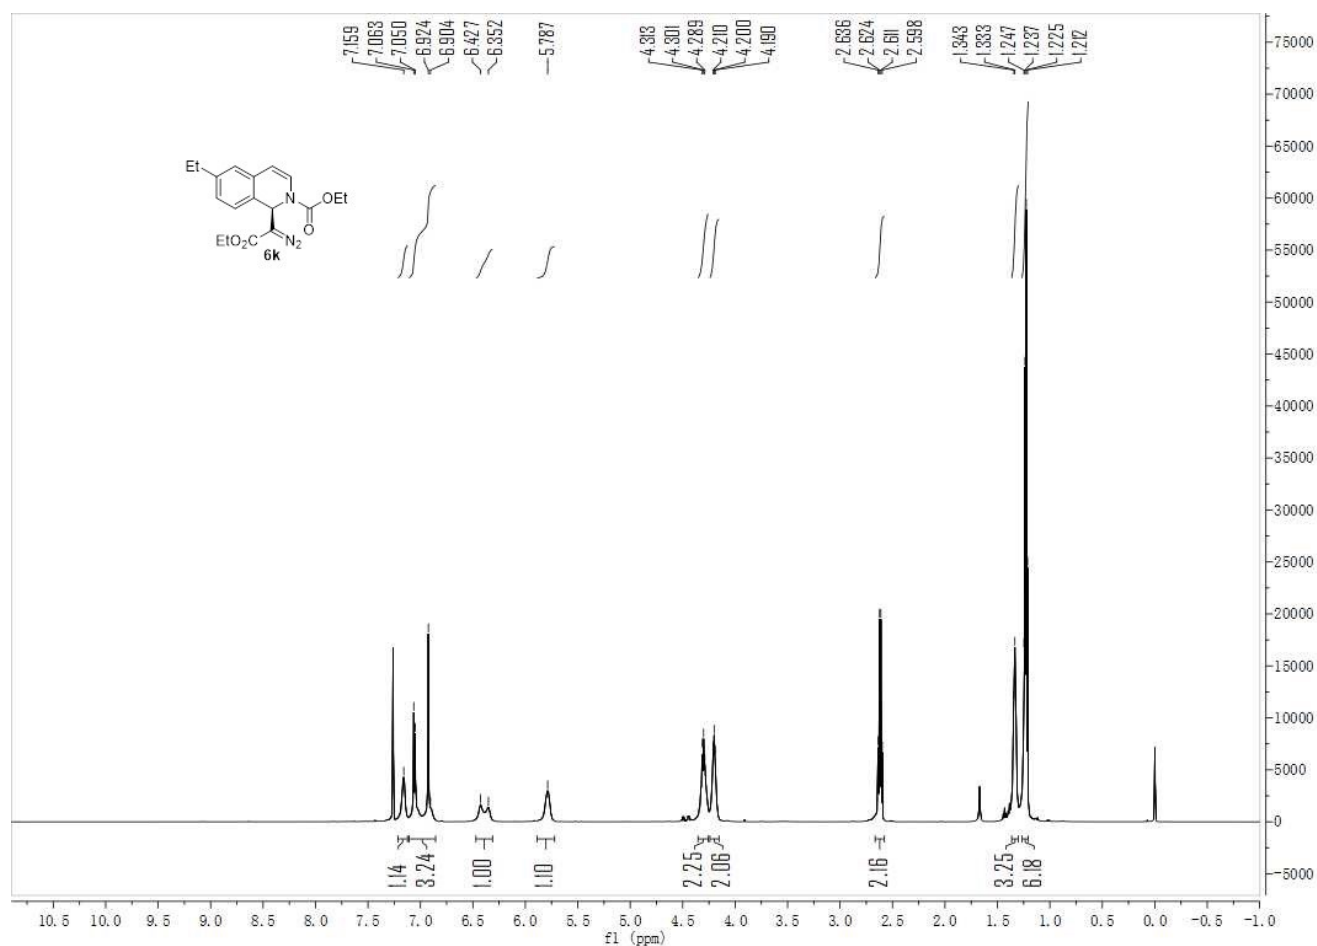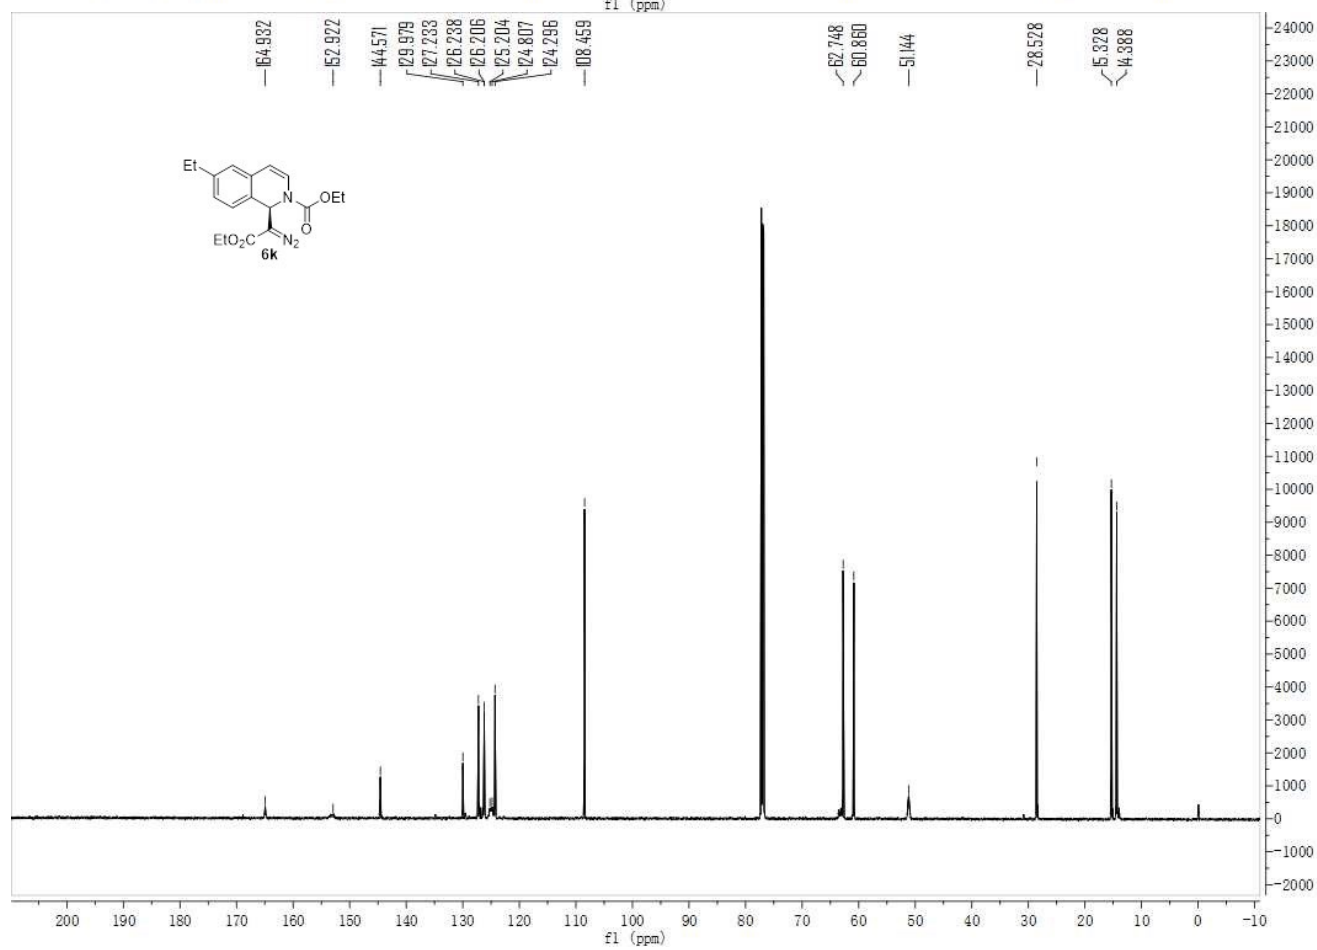

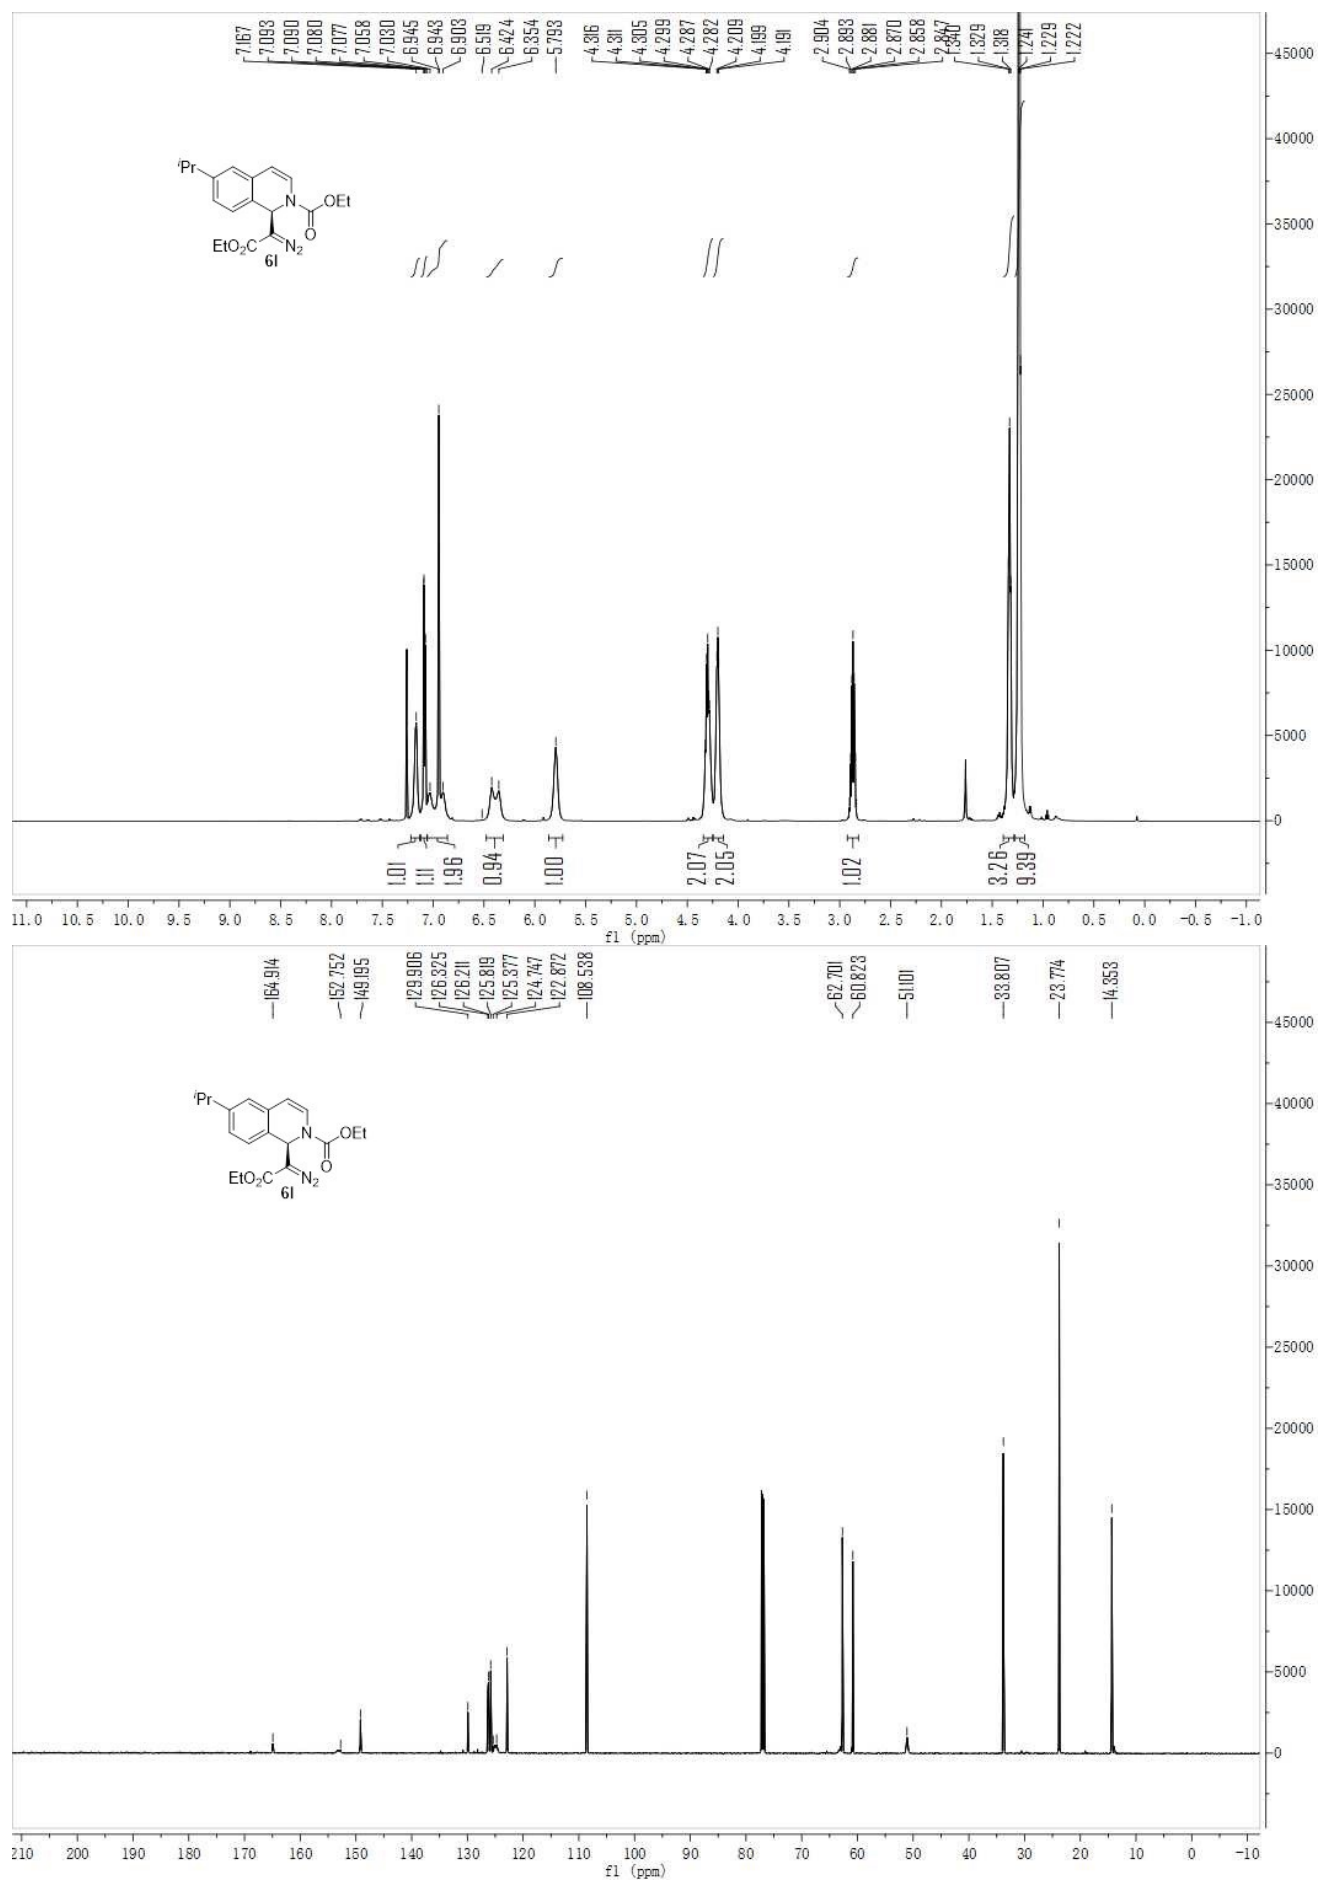

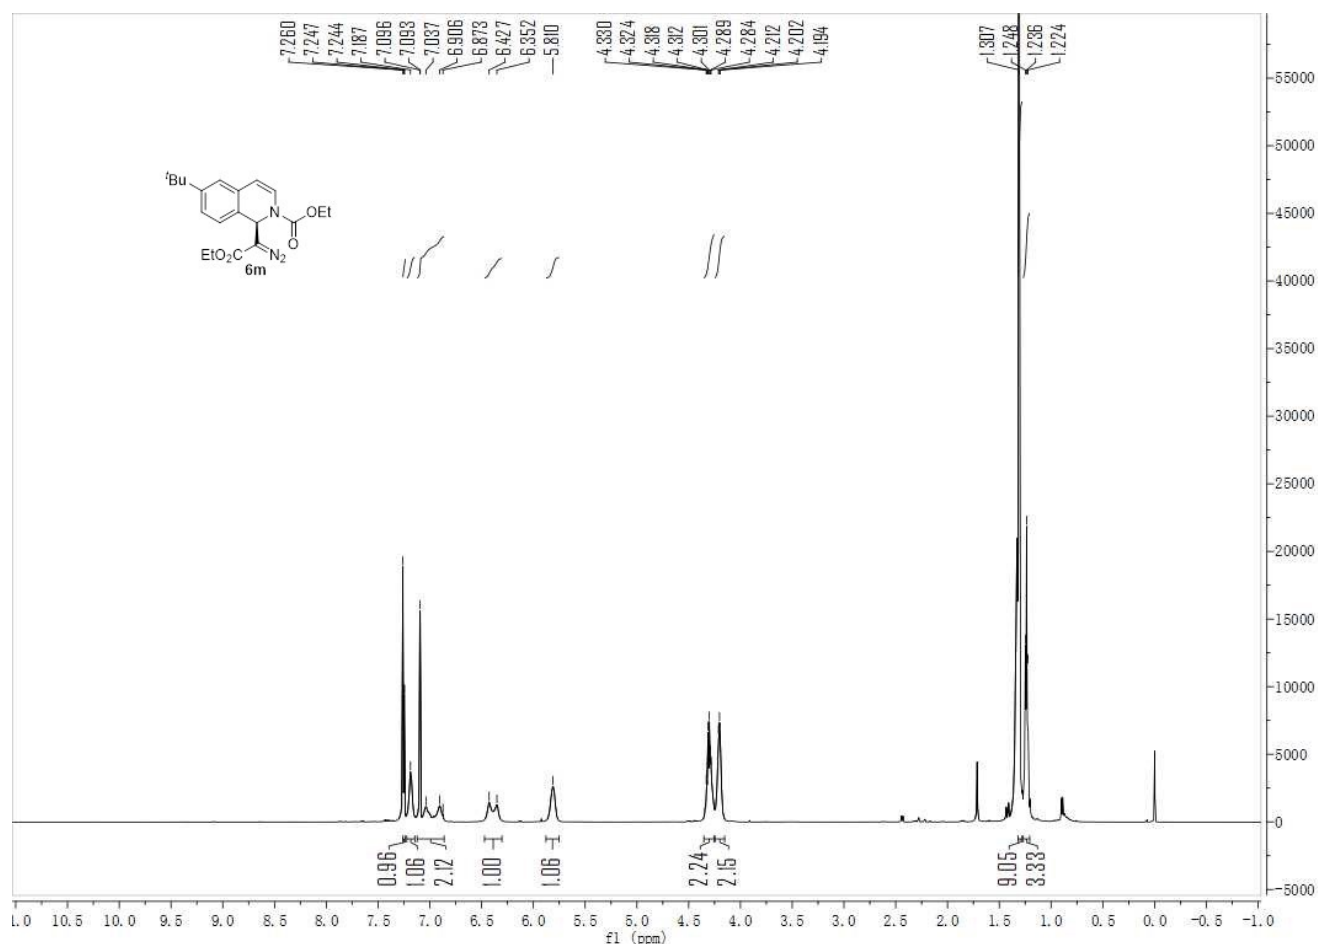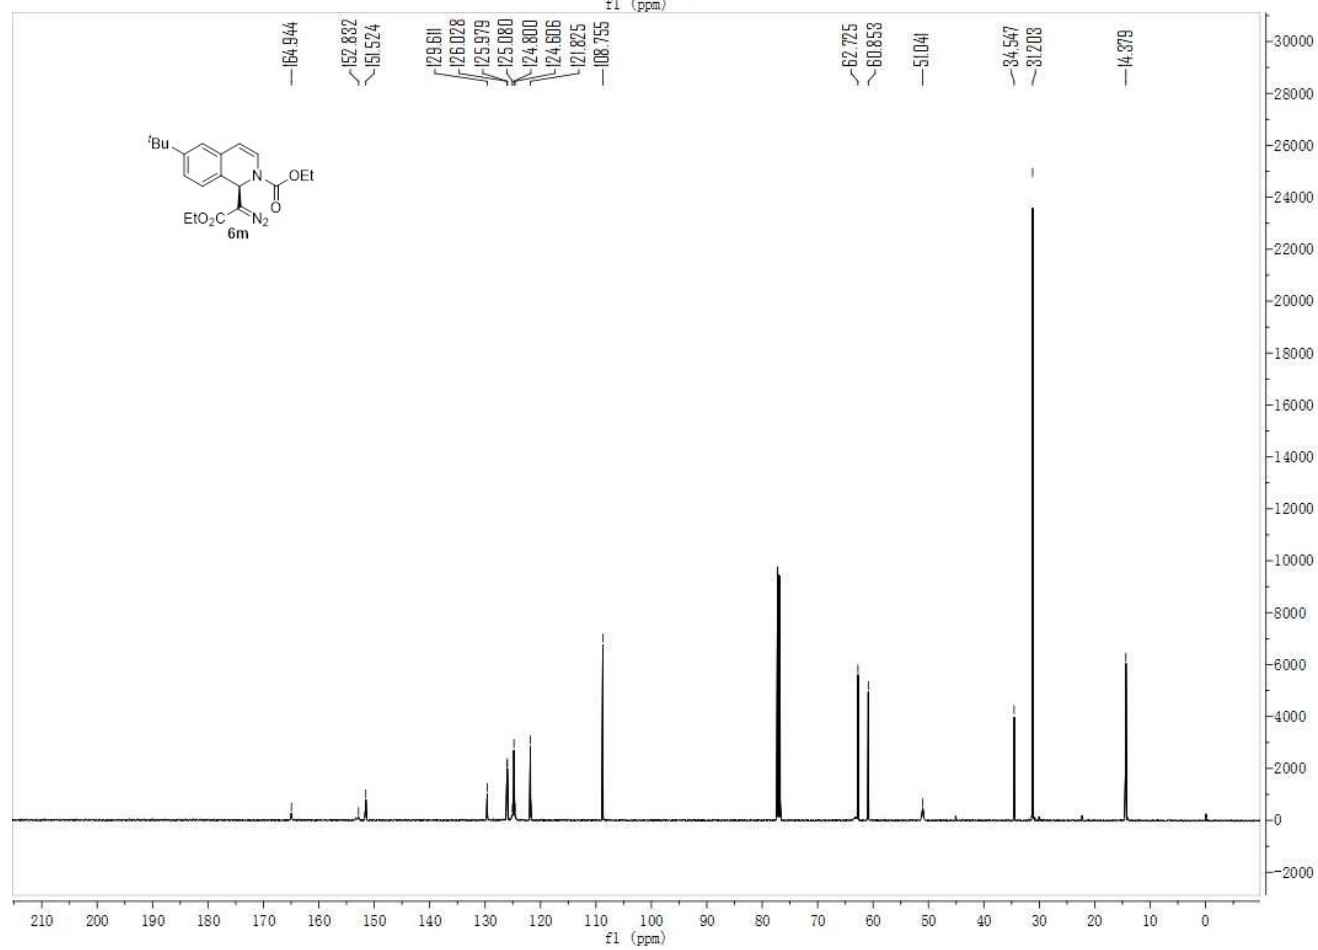

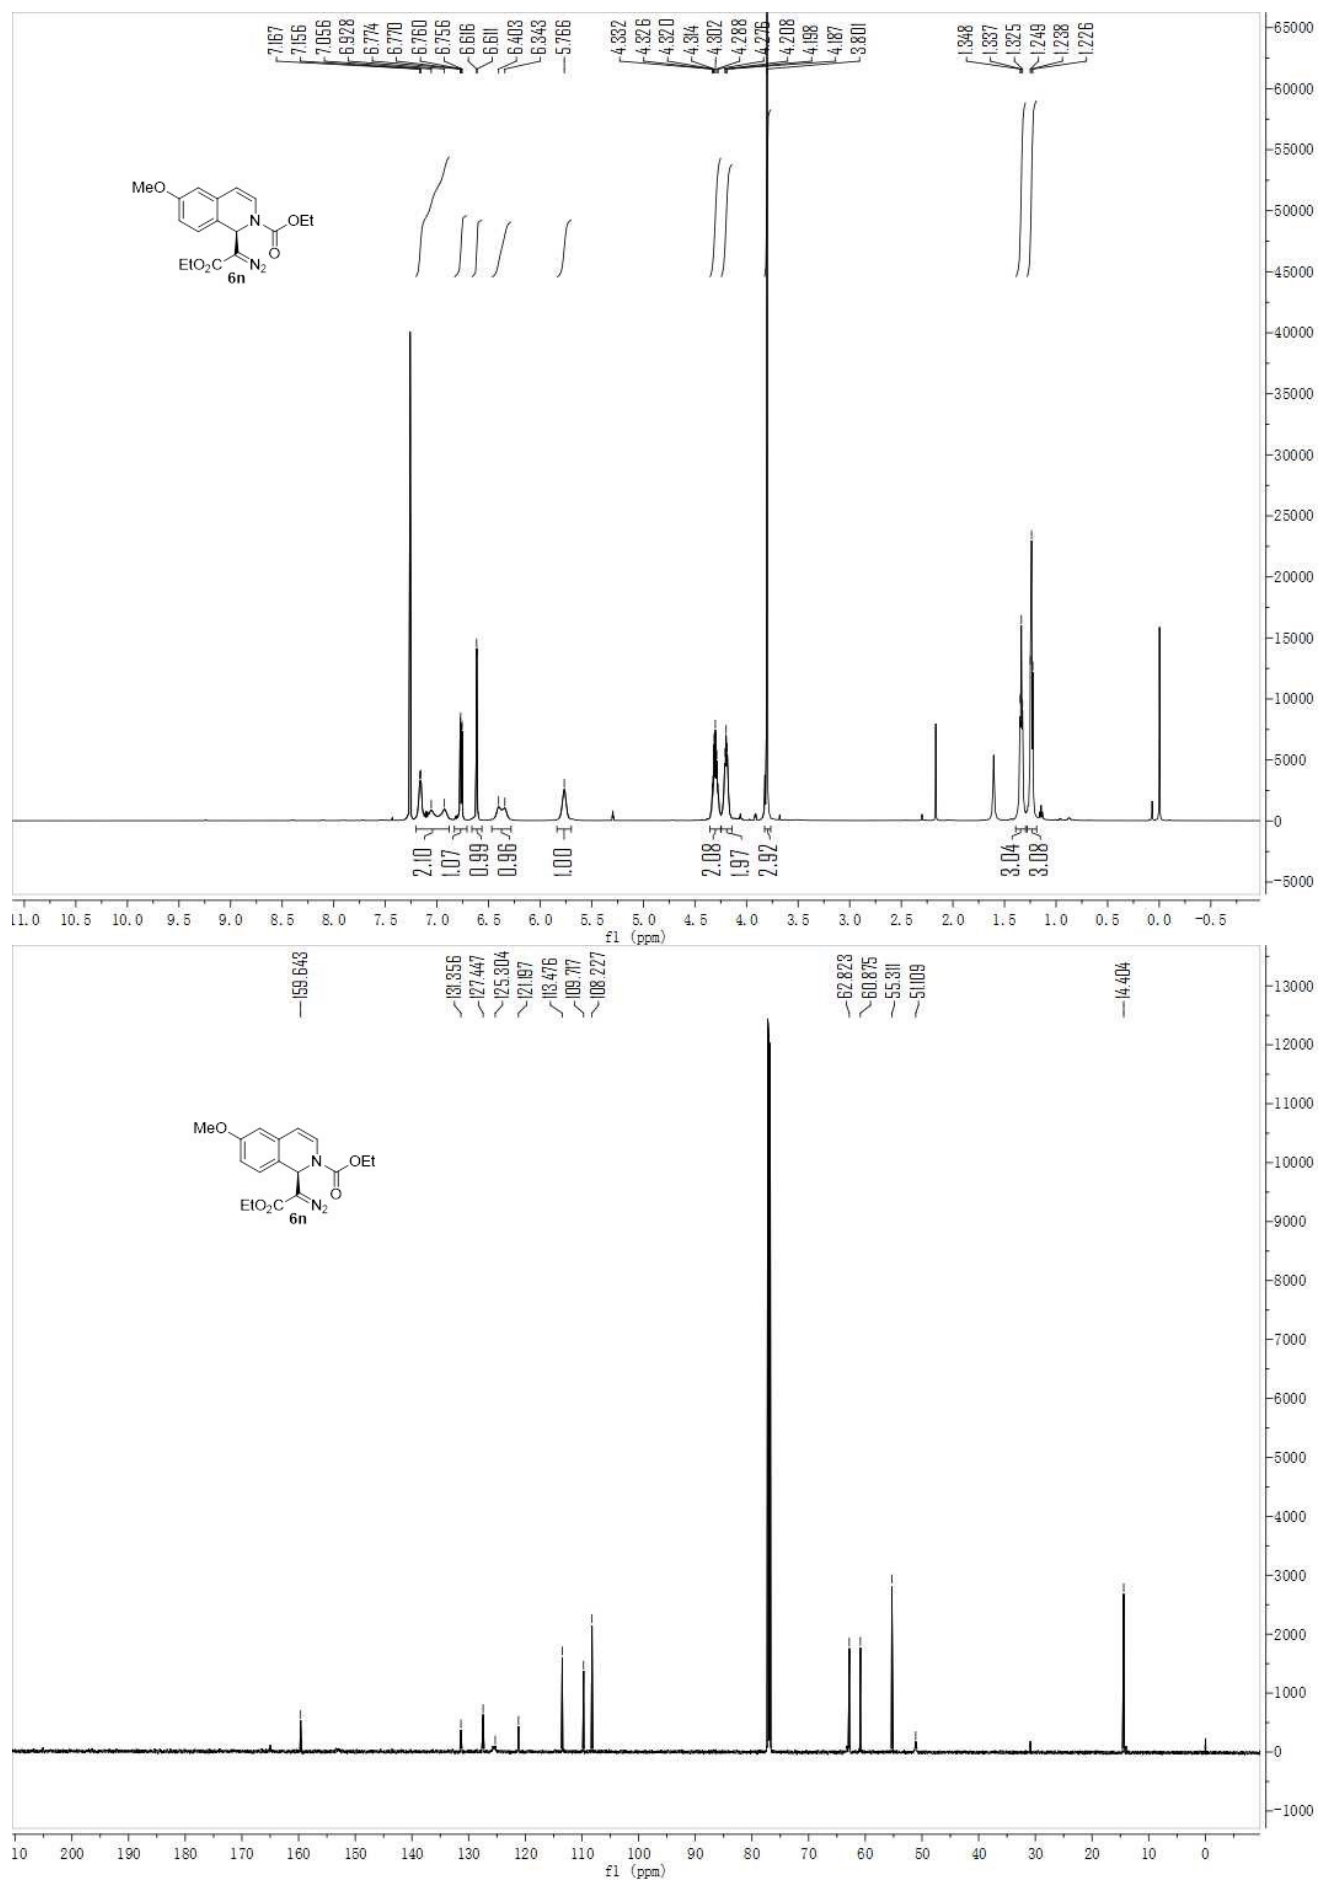

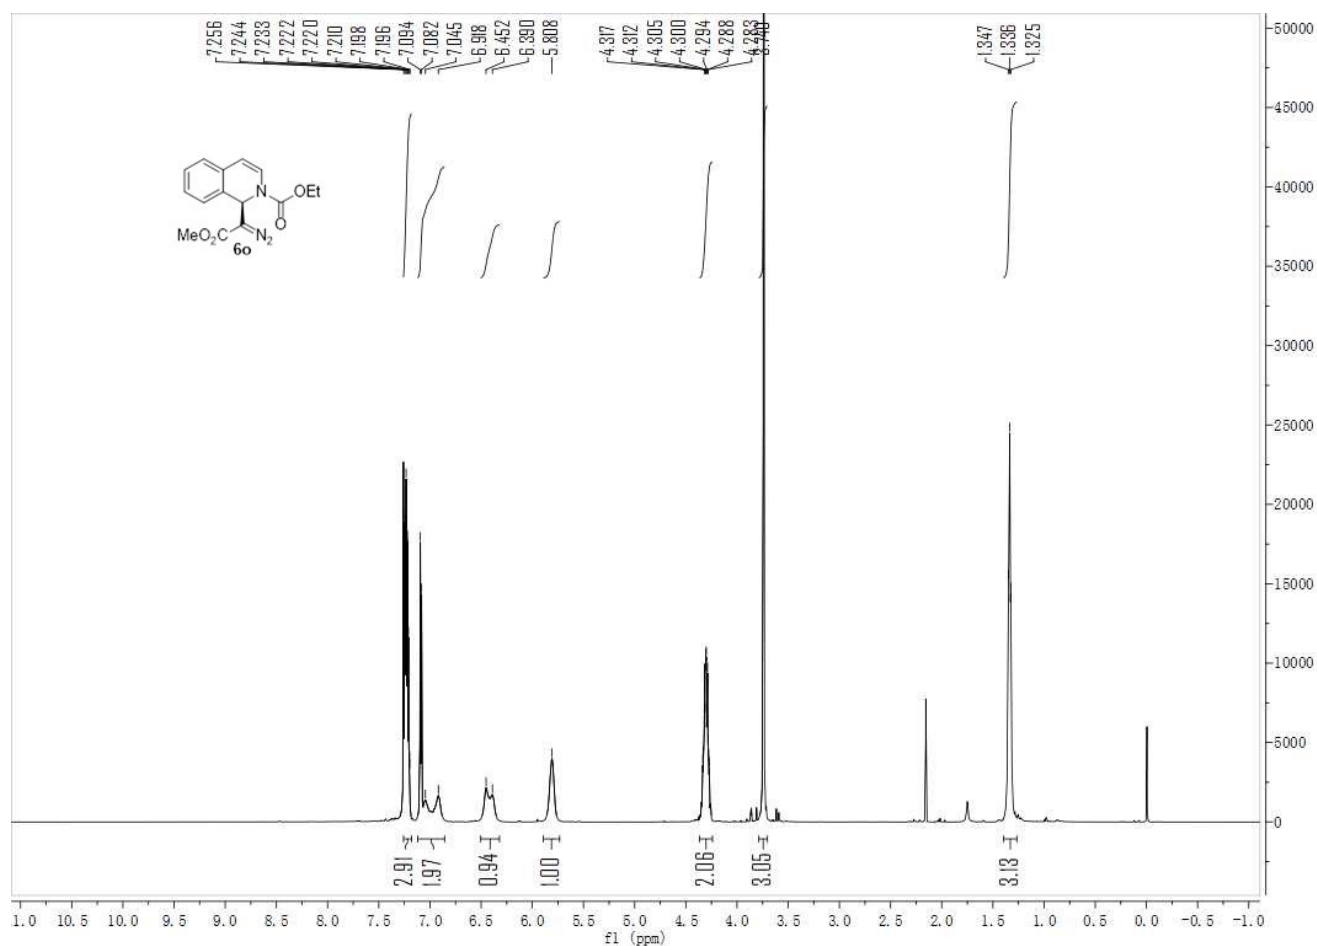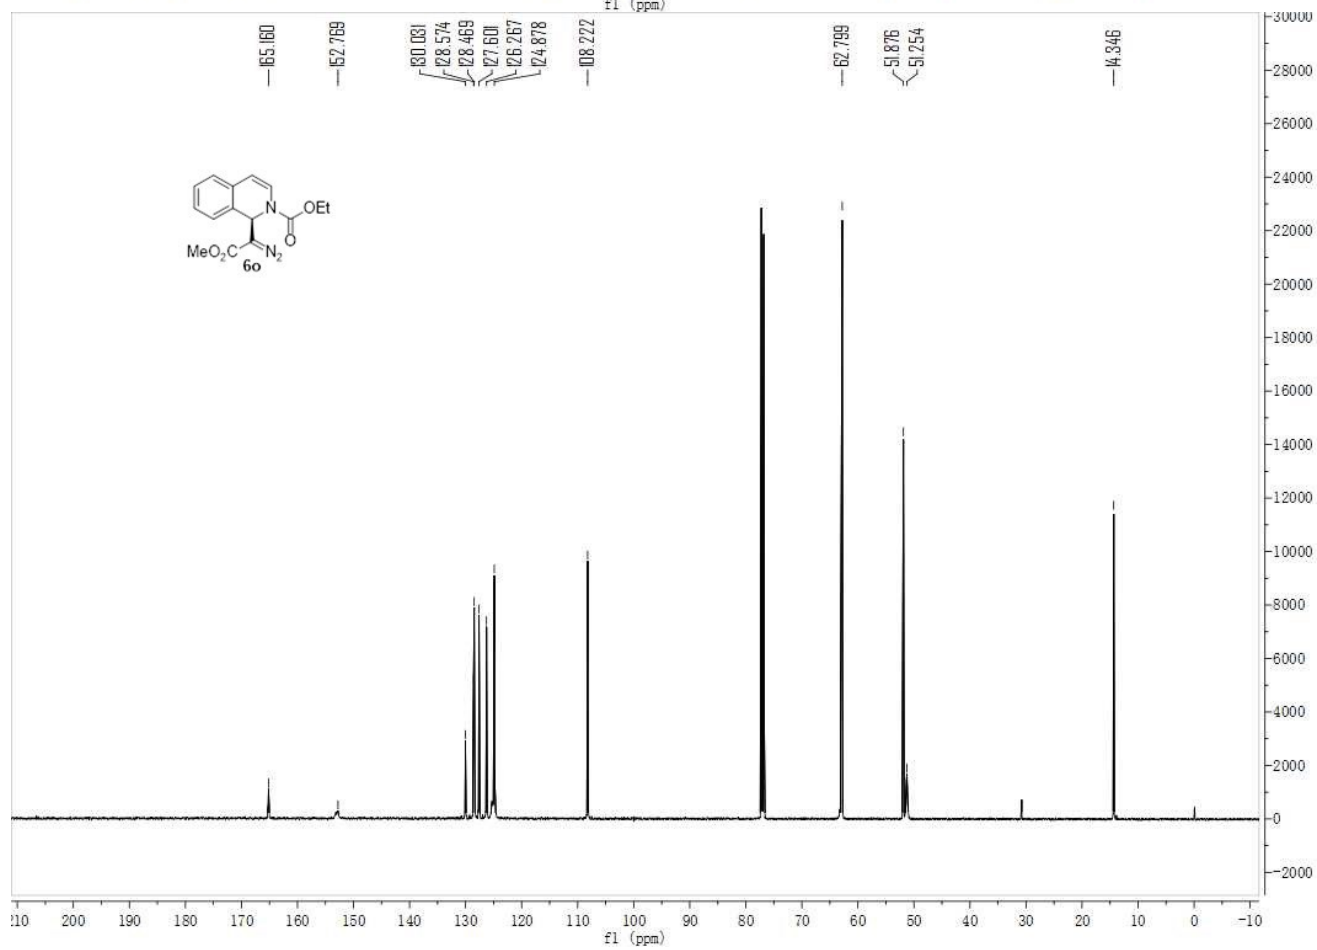



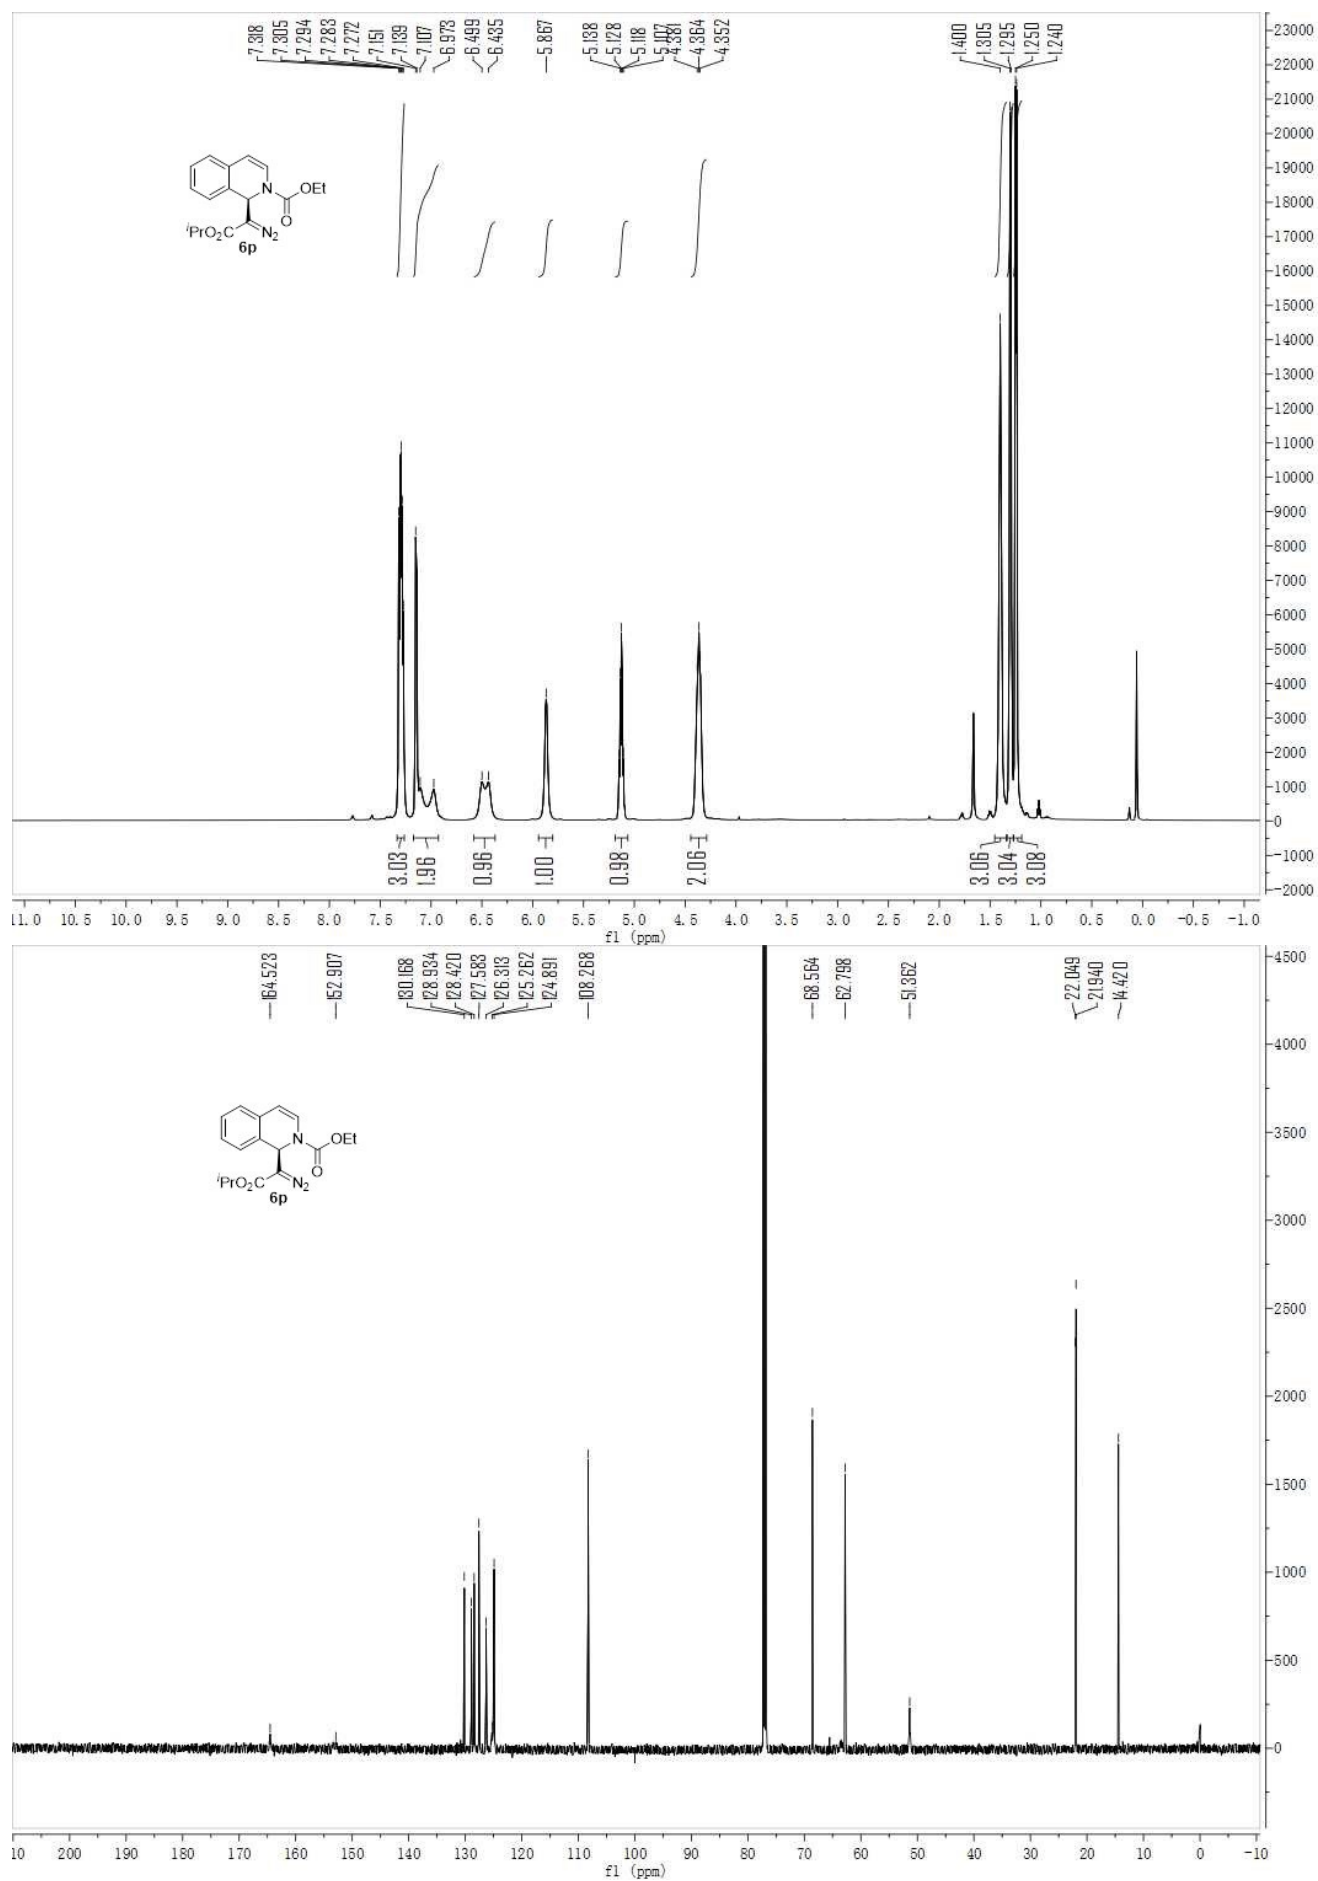

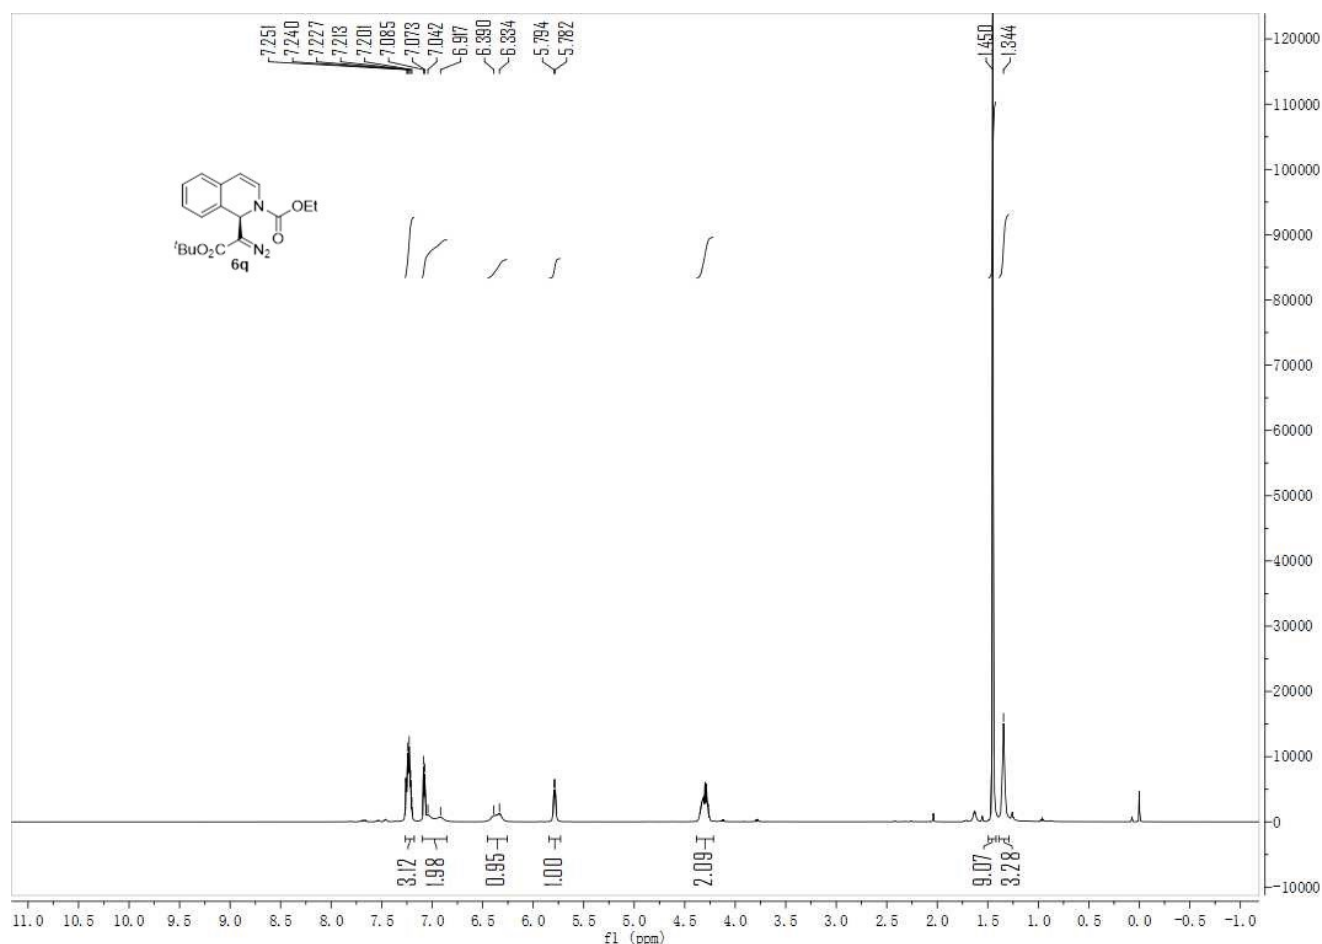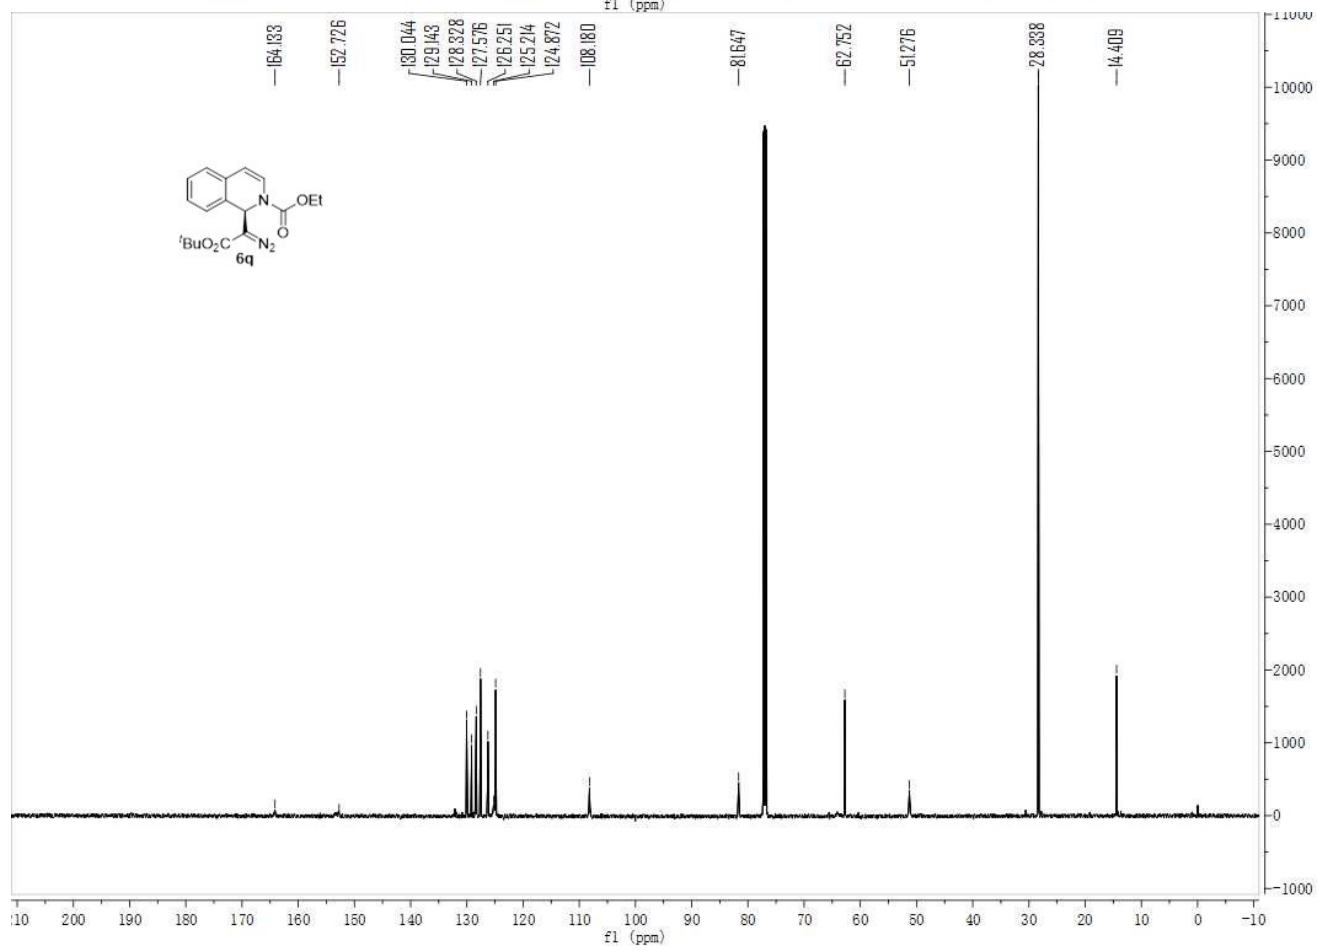

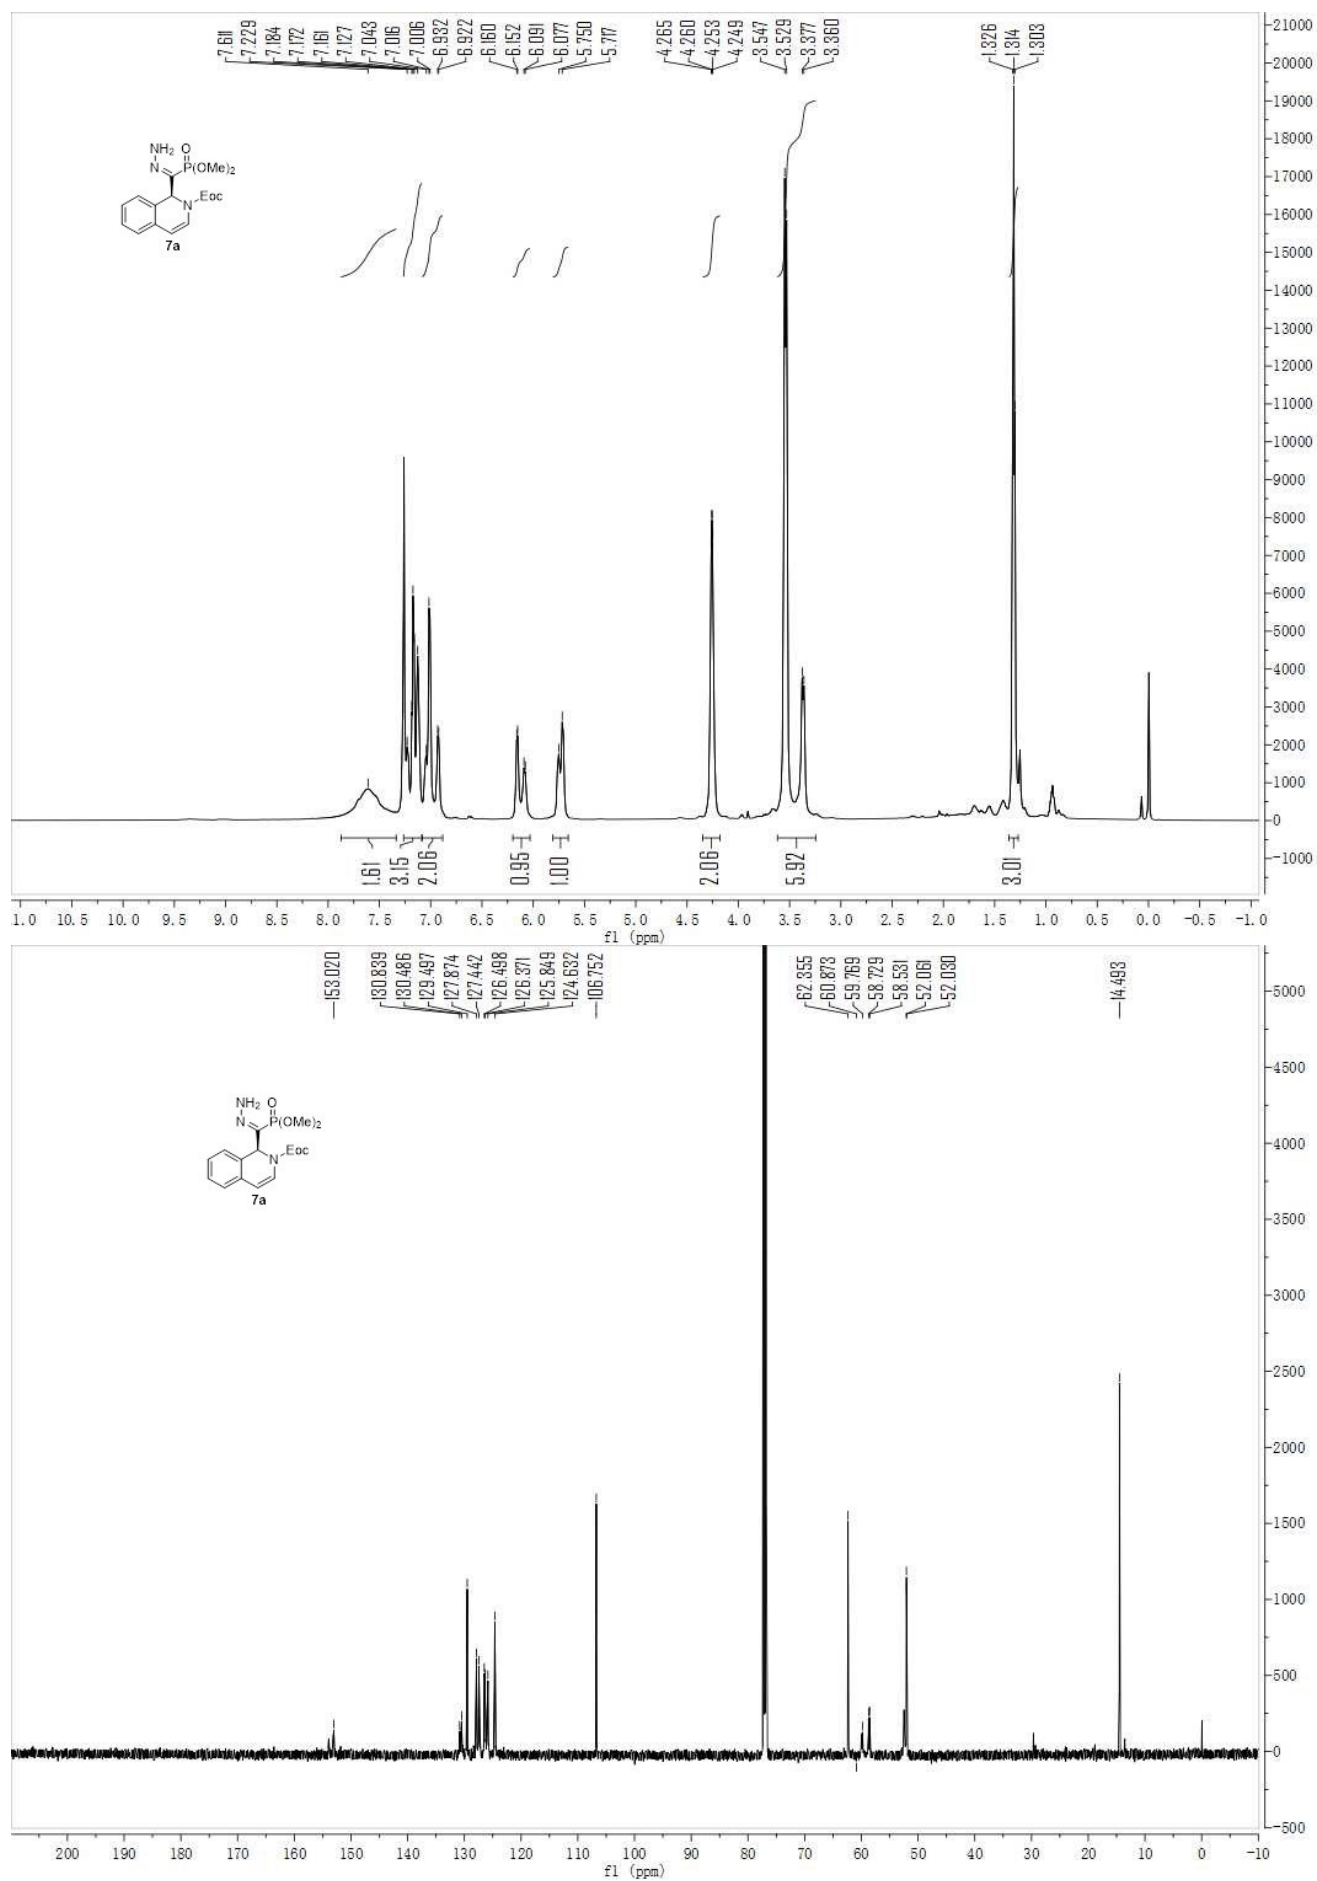

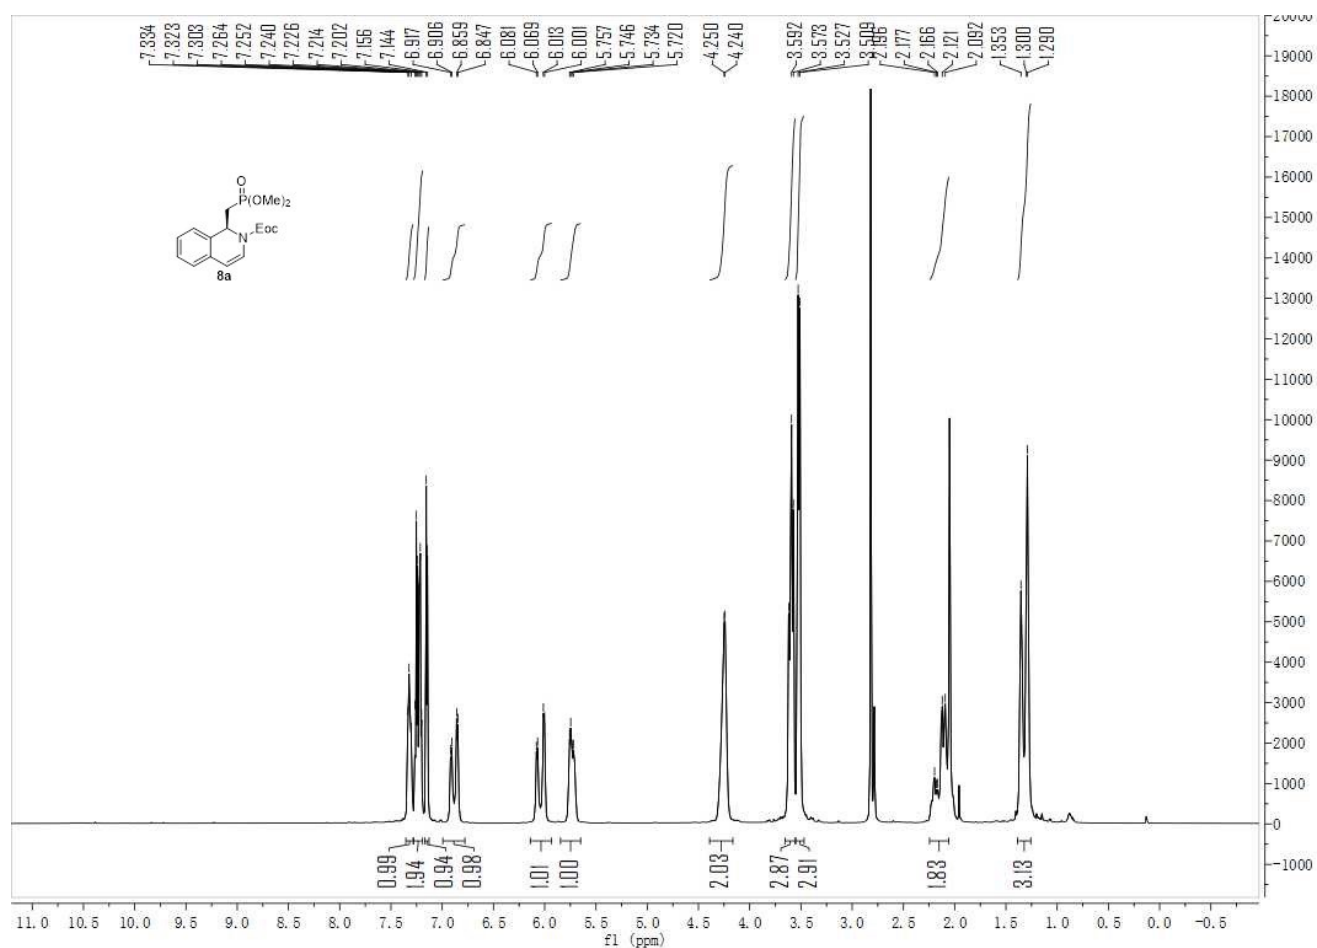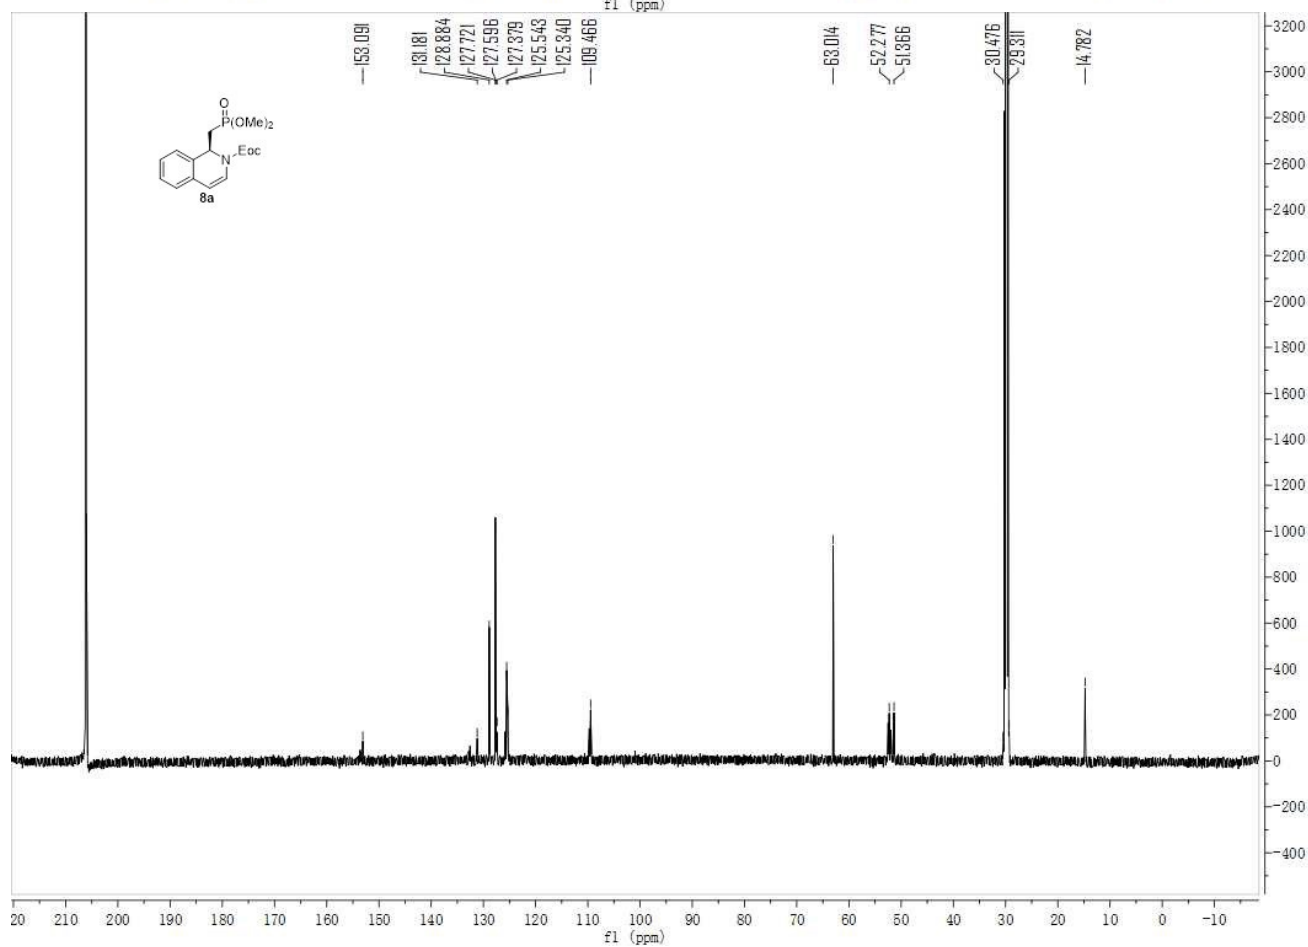

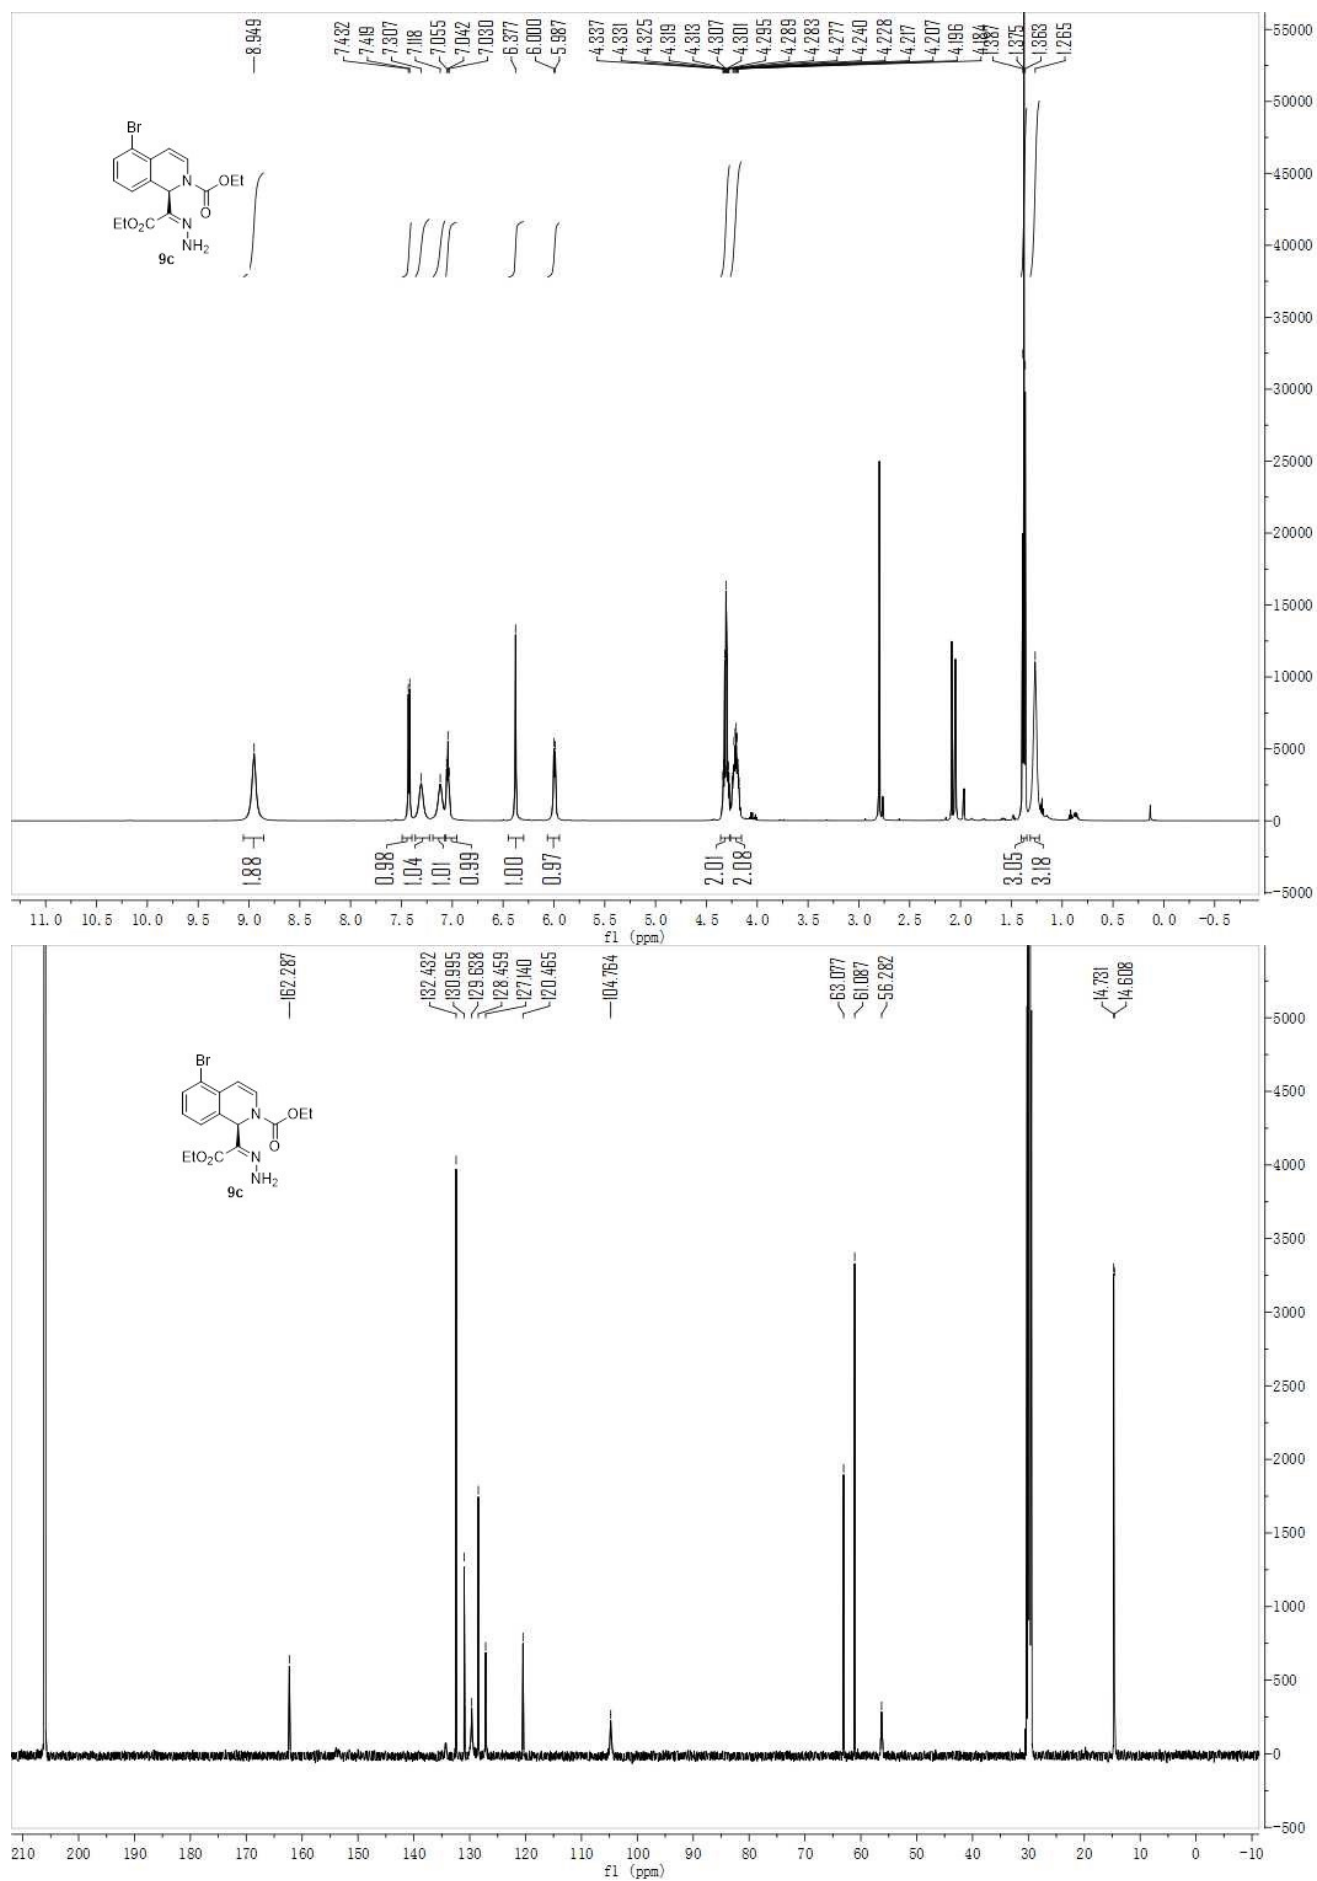

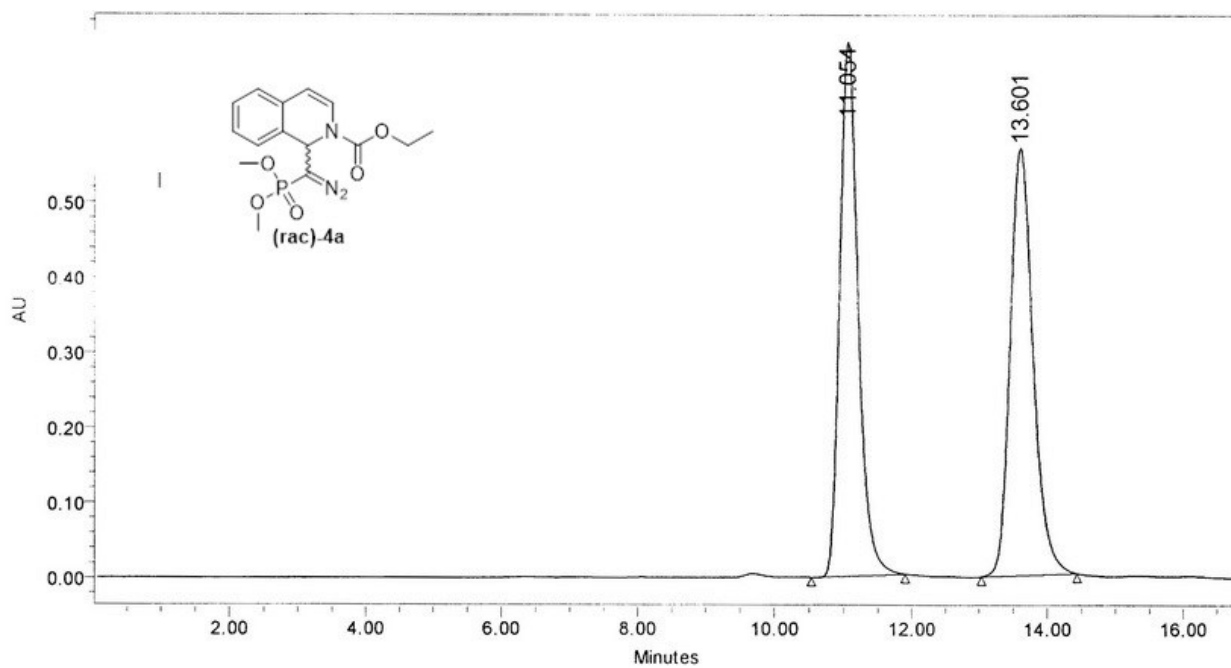

|   | RT<br>(min) | Area<br>( $\mu\text{V}\cdot\text{sec}$ ) | % Area | Height<br>( $\mu\text{V}$ ) | % Height |
|---|-------------|------------------------------------------|--------|-----------------------------|----------|
| 1 | 11.054      | 13194632                                 | 49.79  | 710070                      | 55.48    |
| 2 | 13.601      | 13304806                                 | 50.21  | 569822                      | 44.52    |

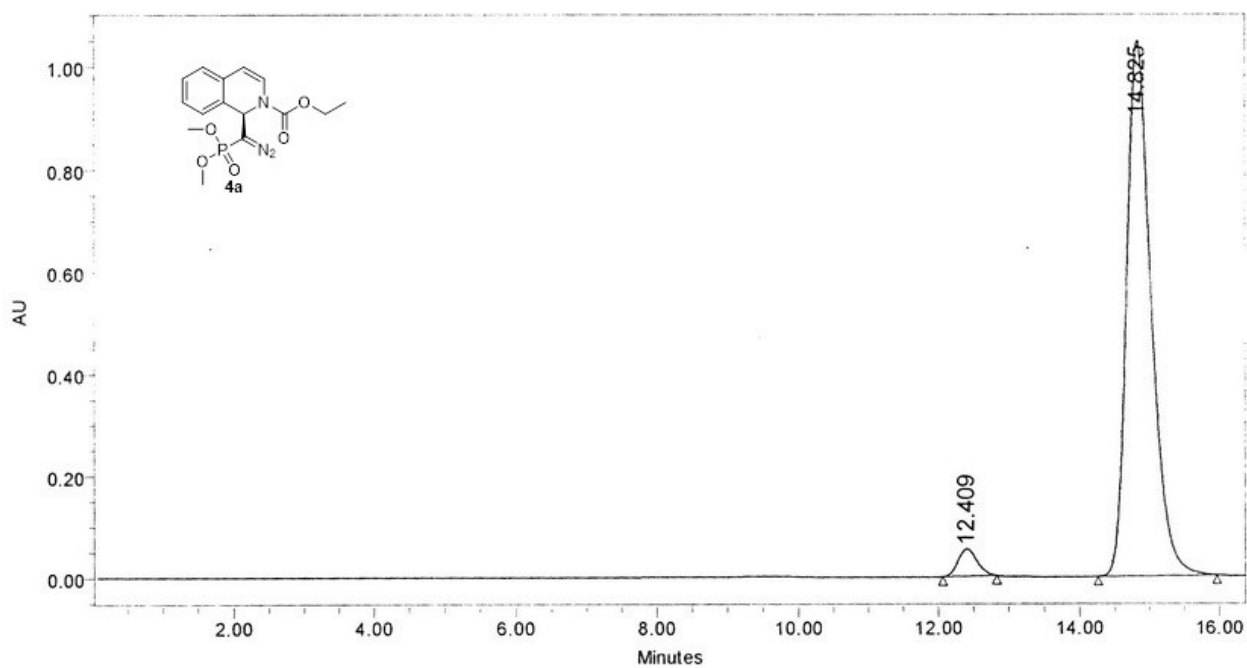

|   | RT<br>(min) | Area<br>( $\mu\text{V}\cdot\text{sec}$ ) | % Area | Height<br>( $\mu\text{V}$ ) | % Height |
|---|-------------|------------------------------------------|--------|-----------------------------|----------|
| 1 | 12.409      | 998061                                   | 3.75   | 53590                       | 4.86     |
| 2 | 14.825      | 25599217                                 | 96.25  | 1048642                     | 95.14    |

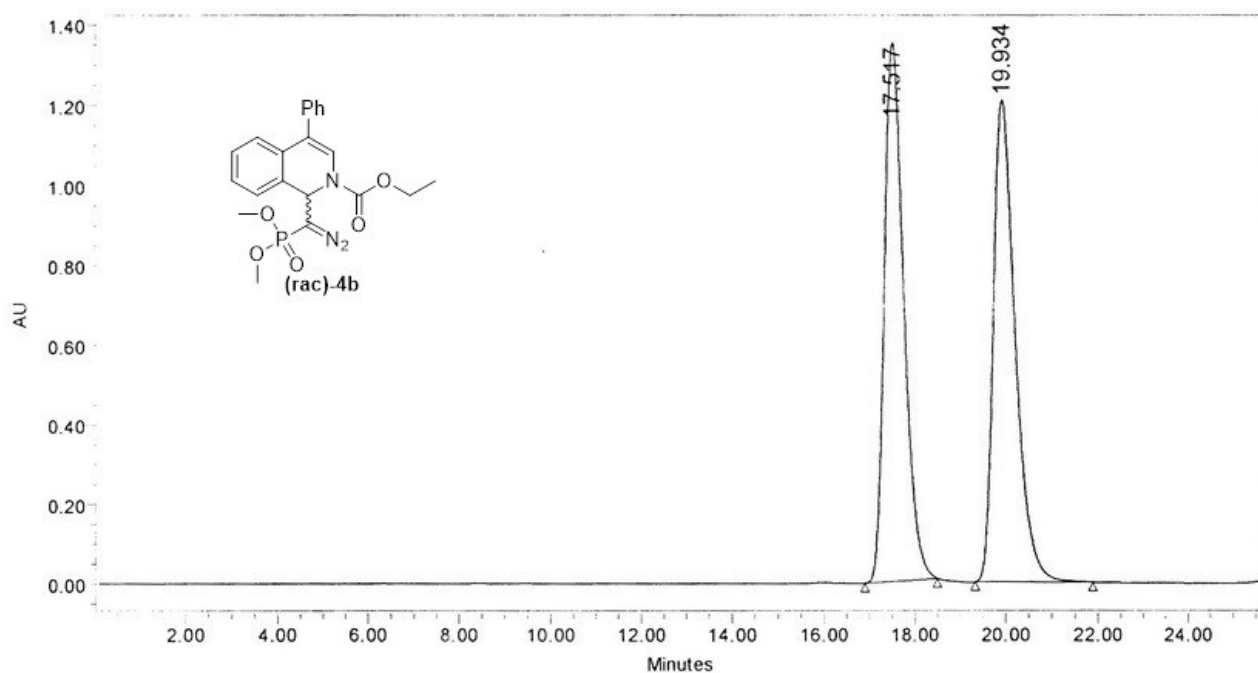

|   | RT<br>(min) | Area<br>( $\mu\text{V}\cdot\text{sec}$ ) | % Area | Height<br>( $\mu\text{V}$ ) | % Height |
|---|-------------|------------------------------------------|--------|-----------------------------|----------|
| 1 | 17.517      | 39999054                                 | 50.11  | 1351118                     | 52.75    |
| 2 | 19.934      | 39825023                                 | 49.89  | 1210460                     | 47.25    |

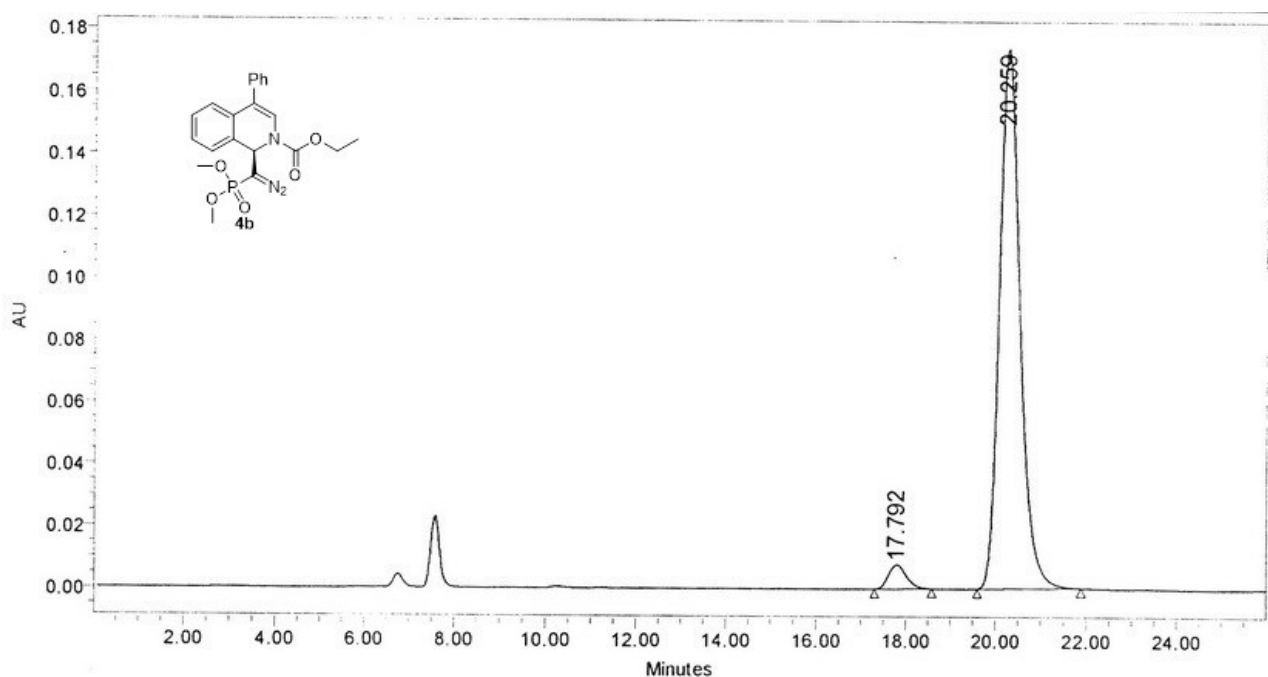

|   | RT<br>(min) | Area<br>( $\mu\text{V}\cdot\text{sec}$ ) | % Area | Height<br>( $\mu\text{V}$ ) | % Height |
|---|-------------|------------------------------------------|--------|-----------------------------|----------|
| 1 | 17.792      | 217872                                   | 3.81   | 7850                        | 4.32     |
| 2 | 20.259      | 5499330                                  | 96.19  | 174051                      | 95.68    |

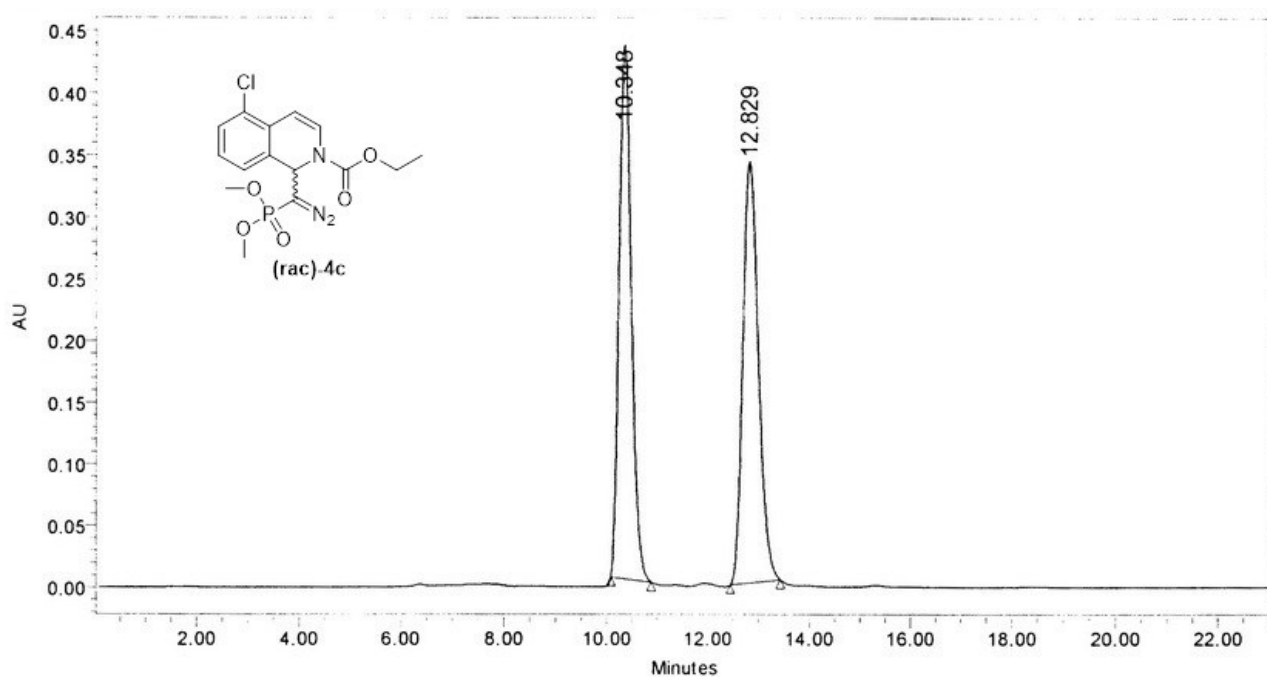

|   | RT<br>(min) | Area<br>( $\mu\text{V}\cdot\text{sec}$ ) | % Area | Height<br>( $\mu\text{V}$ ) | % Height |
|---|-------------|------------------------------------------|--------|-----------------------------|----------|
| 1 | 10.348      | 7234772                                  | 49.95  | 431922                      | 55.81    |
| 2 | 12.829      | 7247832                                  | 50.05  | 341925                      | 44.19    |

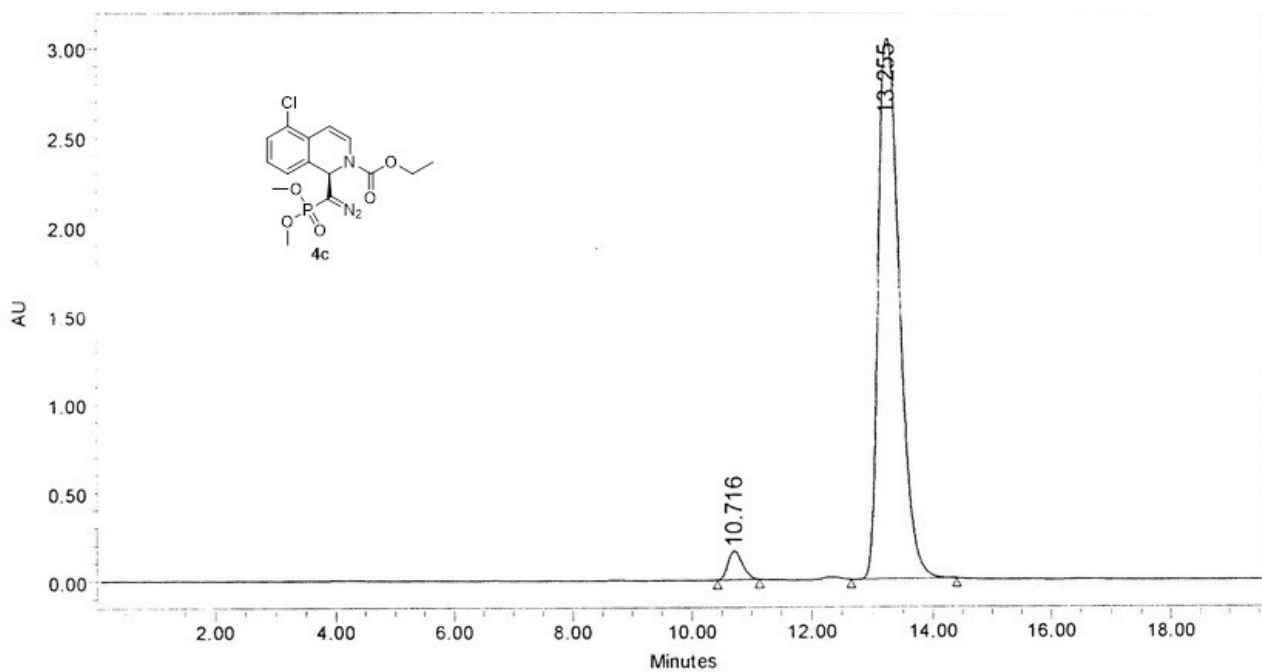

|   | RT<br>(min) | Area<br>( $\mu\text{V}\cdot\text{sec}$ ) | % Area | Height<br>( $\mu\text{V}$ ) | % Height |
|---|-------------|------------------------------------------|--------|-----------------------------|----------|
| 1 | 10.716      | 2701230                                  | 3.53   | 161159                      | 5.03     |
| 2 | 13.255      | 73774243                                 | 96.47  | 3040776                     | 94.97    |



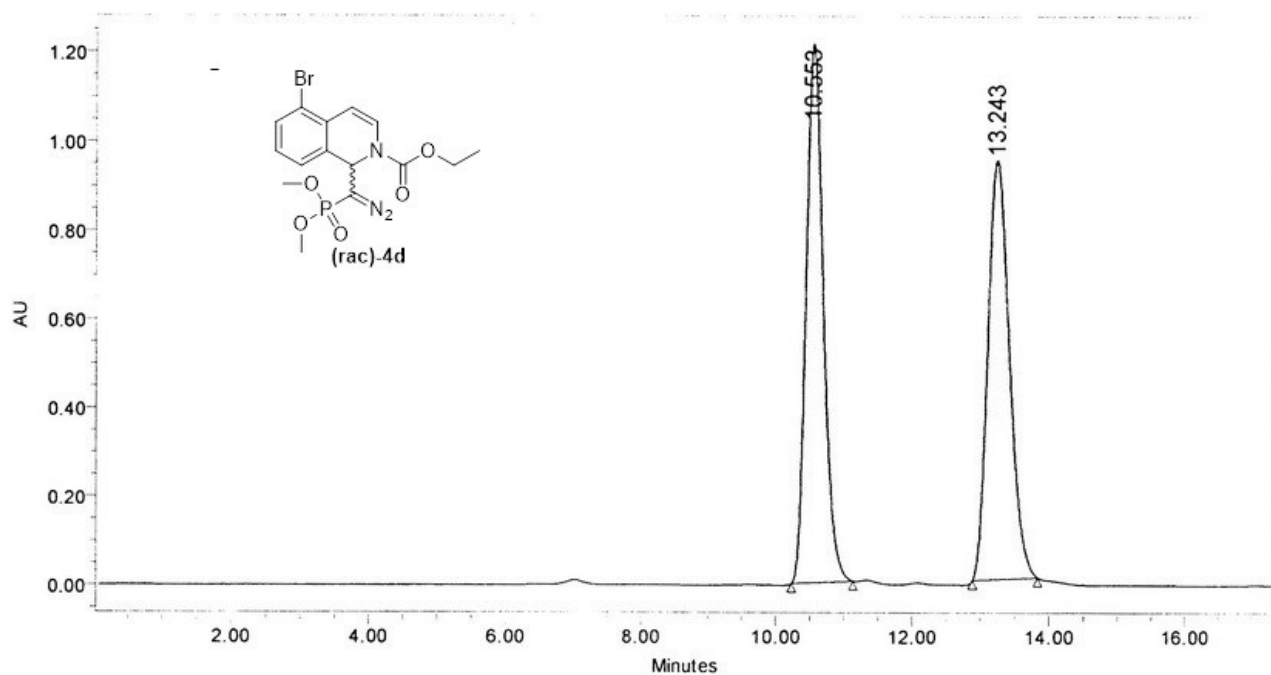

|   | RT<br>(min) | Area<br>( $\mu\text{V}\cdot\text{sec}$ ) | % Area | Height<br>( $\mu\text{V}$ ) | % Height |
|---|-------------|------------------------------------------|--------|-----------------------------|----------|
| 1 | 10.553      | 21075258                                 | 50.59  | 1214532                     | 56.18    |
| 2 | 13.243      | 20579773                                 | 49.41  | 947423                      | 43.82    |

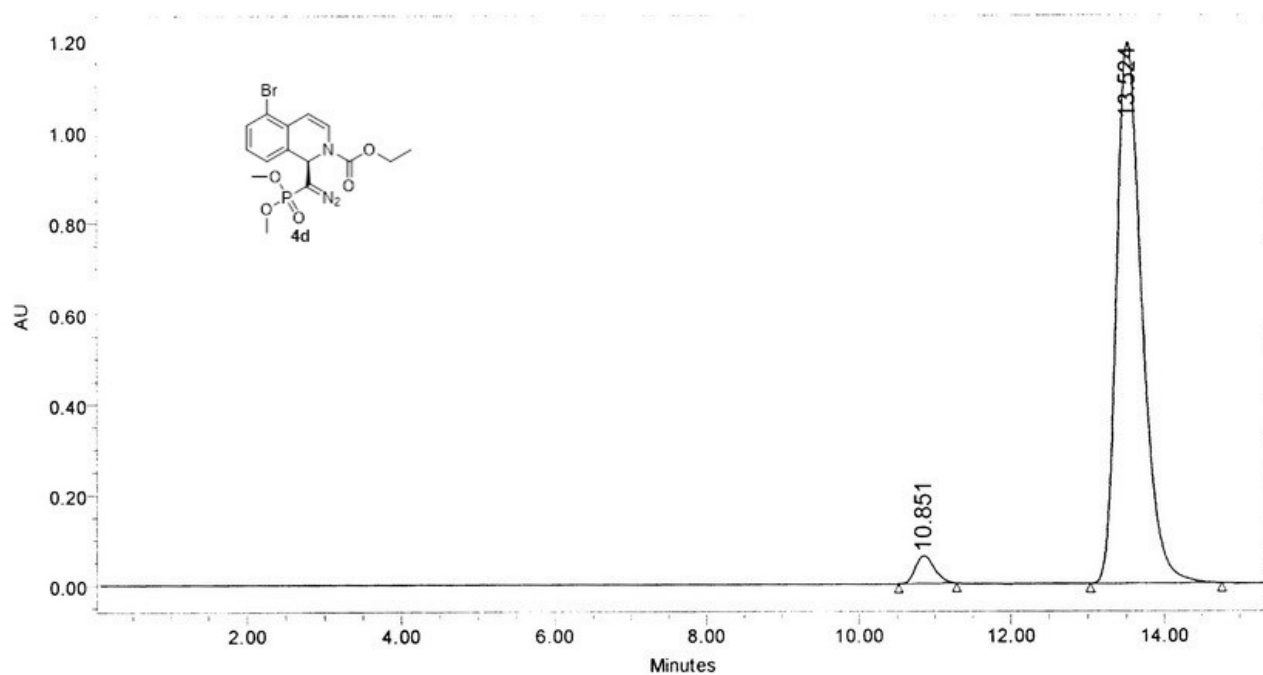

|   | RT<br>(min) | Area<br>( $\mu\text{V}\cdot\text{sec}$ ) | % Area | Height<br>( $\mu\text{V}$ ) | % Height |
|---|-------------|------------------------------------------|--------|-----------------------------|----------|
| 1 | 10.851      | 1071960                                  | 3.73   | 61318                       | 4.89     |
| 2 | 13.524      | 27679184                                 | 96.27  | 1193869                     | 95.11    |

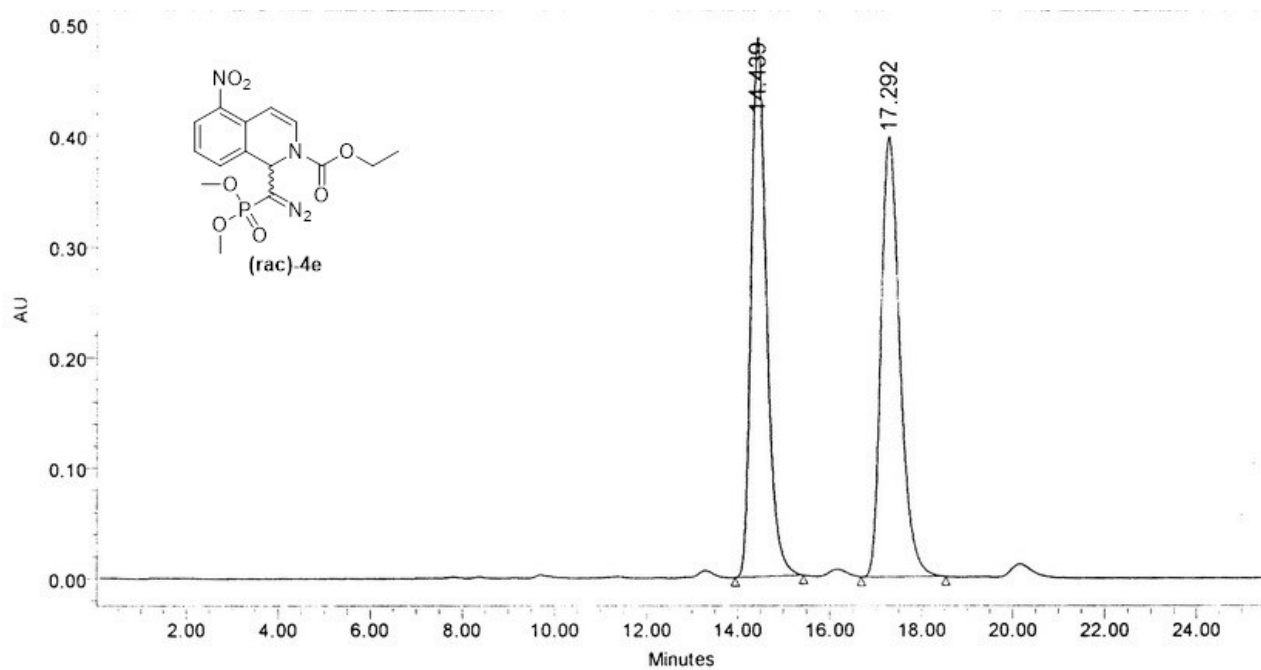

|   | RT<br>(min) | Area<br>( $\mu\text{V}\cdot\text{sec}$ ) | % Area | Height<br>( $\mu\text{V}$ ) | % Height |
|---|-------------|------------------------------------------|--------|-----------------------------|----------|
| 1 | 14.439      | 11312528                                 | 50.06  | 487374                      | 55.01    |
| 2 | 17.292      | 11287424                                 | 49.94  | 398636                      | 44.99    |

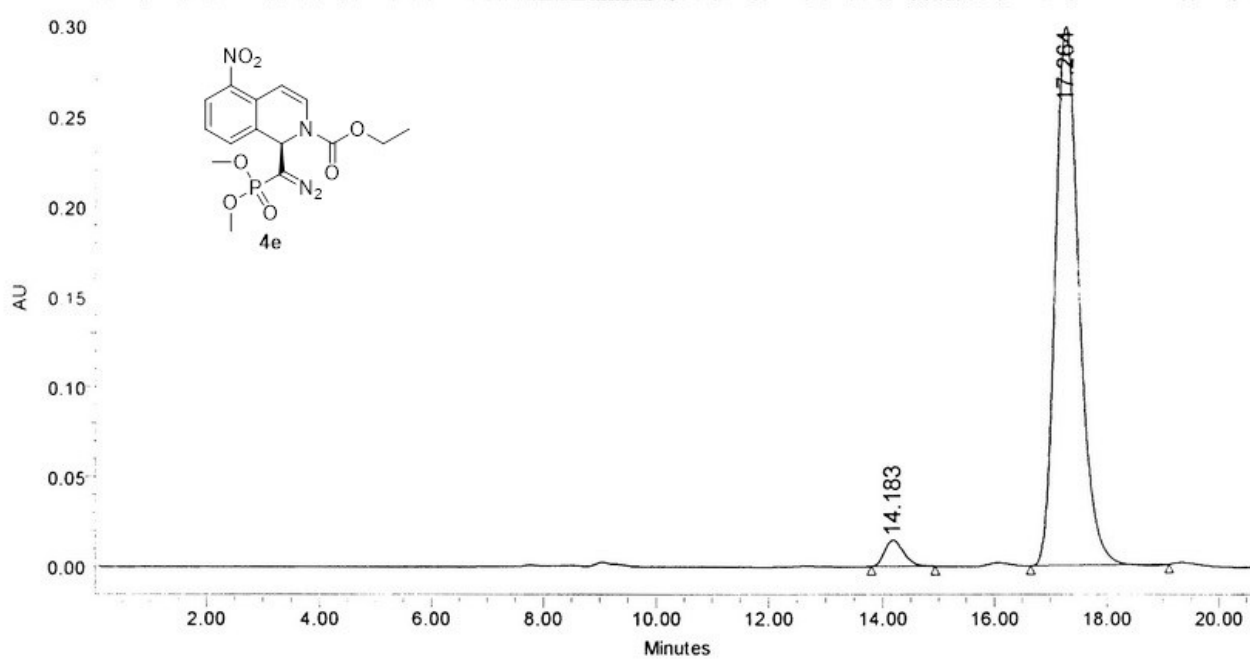

|   | RT<br>(min) | Area<br>( $\mu\text{V}\cdot\text{sec}$ ) | % Area | Height<br>( $\mu\text{V}$ ) | % Height |
|---|-------------|------------------------------------------|--------|-----------------------------|----------|
| 1 | 14.183      | 339604                                   | 3.74   | 14573                       | 4.64     |
| 2 | 17.264      | 8741220                                  | 96.26  | 299416                      | 95.36    |

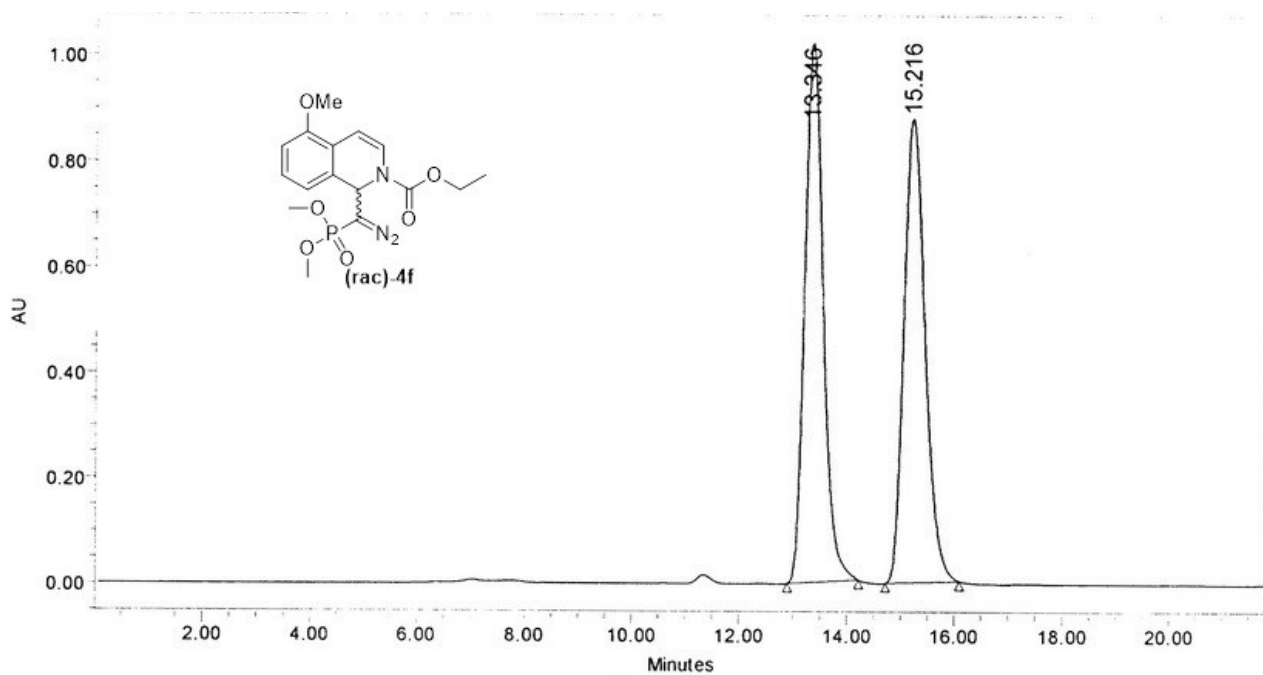

|   | RT<br>(min) | Area<br>( $\mu\text{V}\cdot\text{sec}$ ) | % Area | Height<br>( $\mu\text{V}$ ) | % Height |
|---|-------------|------------------------------------------|--------|-----------------------------|----------|
| 1 | 13.346      | 24253423                                 | 50.15  | 1022125                     | 53.73    |
| 2 | 15.216      | 24108178                                 | 49.85  | 880314                      | 46.27    |

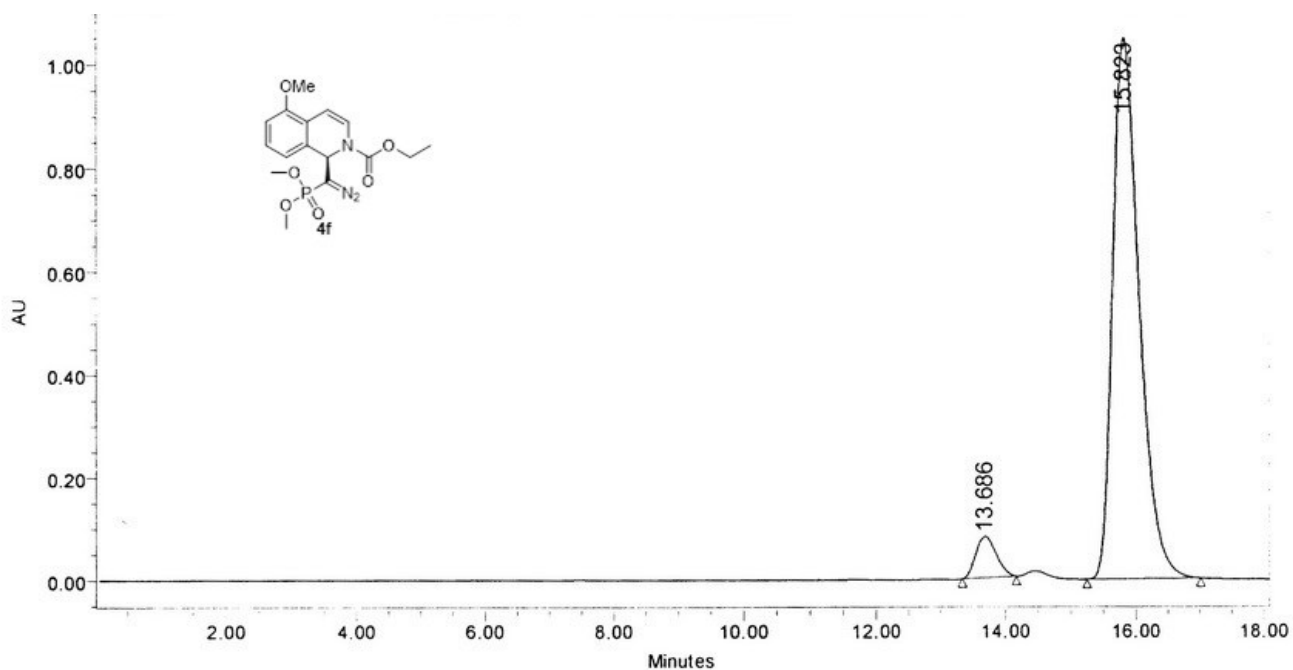

|   | RT<br>(min) | Area<br>( $\mu\text{V}\cdot\text{sec}$ ) | % Area | Height<br>( $\mu\text{V}$ ) | % Height |
|---|-------------|------------------------------------------|--------|-----------------------------|----------|
| 1 | 13.686      | 1765079                                  | 5.58   | 80404                       | 7.12     |
| 2 | 15.823      | 29869425                                 | 94.42  | 1048852                     | 92.88    |

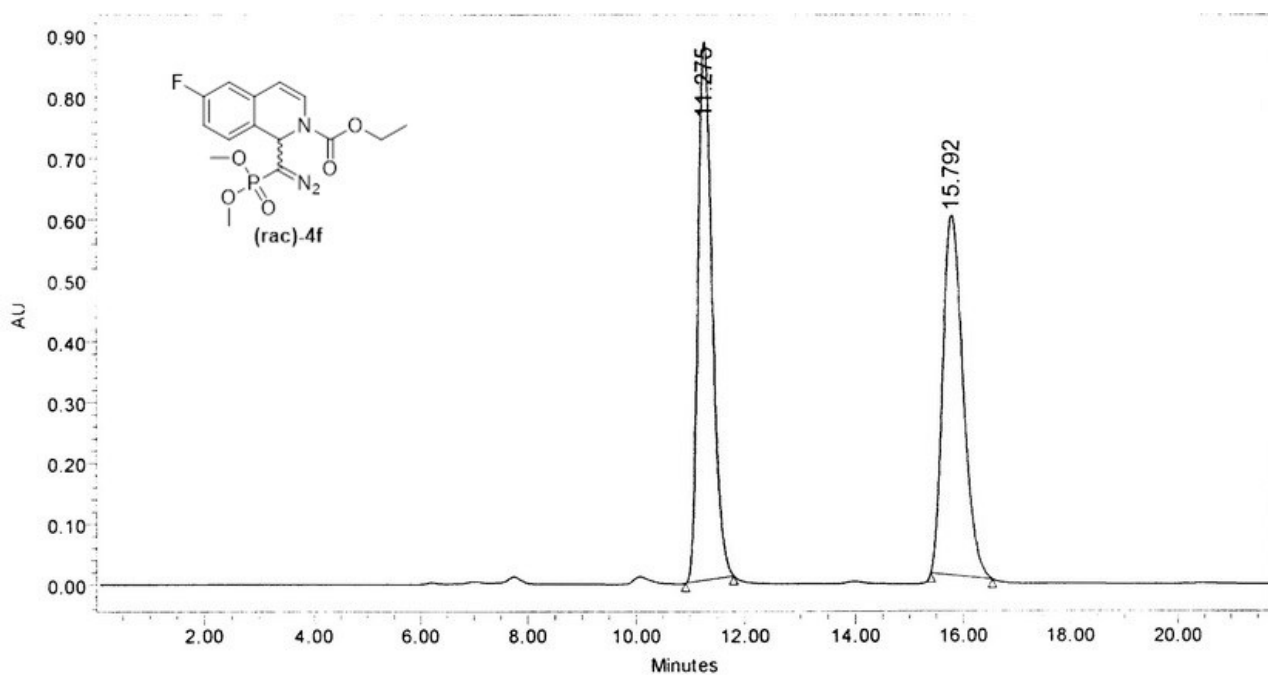

|   | RT (min) | Area (μV*sec) | % Area | Height (μV) | % Height |
|---|----------|---------------|--------|-------------|----------|
| 1 | 11.275   | 15991773      | 50.53  | 884588      | 59.87    |
| 2 | 15.792   | 15657718      | 49.47  | 592980      | 40.13    |

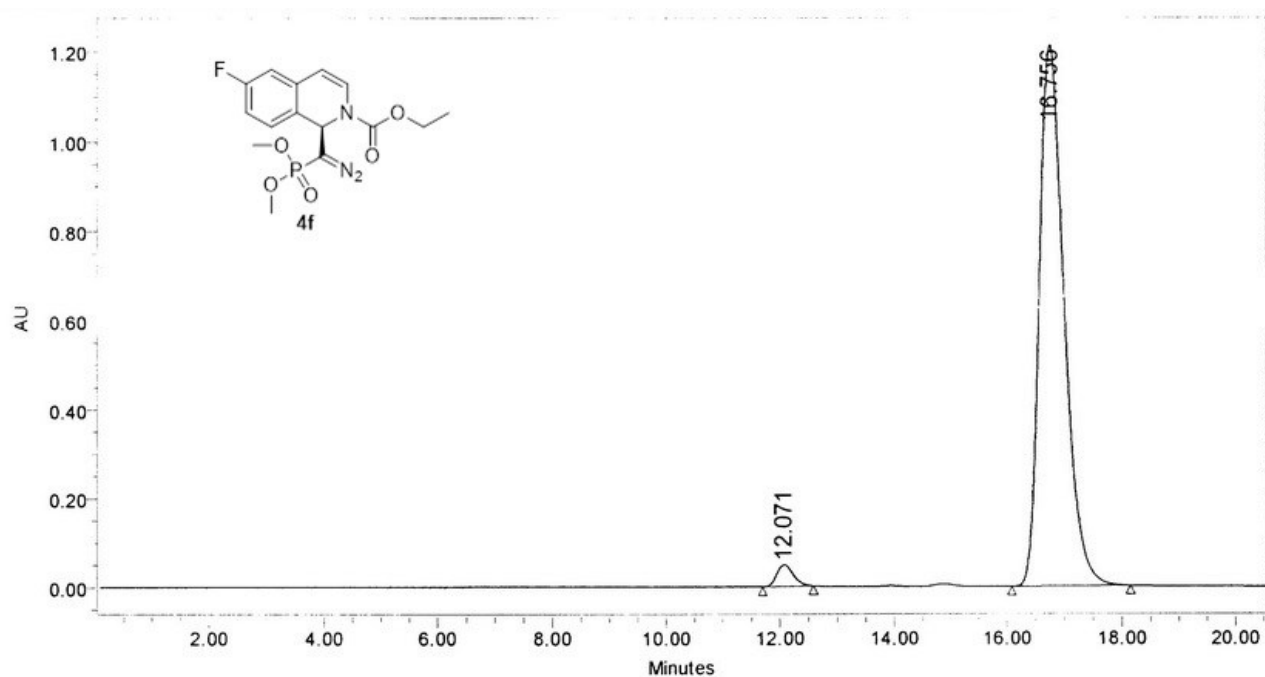

|   | RT (min) | Area (μV*sec) | % Area | Height (μV) | % Height |
|---|----------|---------------|--------|-------------|----------|
| 1 | 12.071   | 958661        | 2.59   | 48424       | 3.84     |
| 2 | 16.756   | 36053163      | 97.41  | 1213574     | 96.16    |

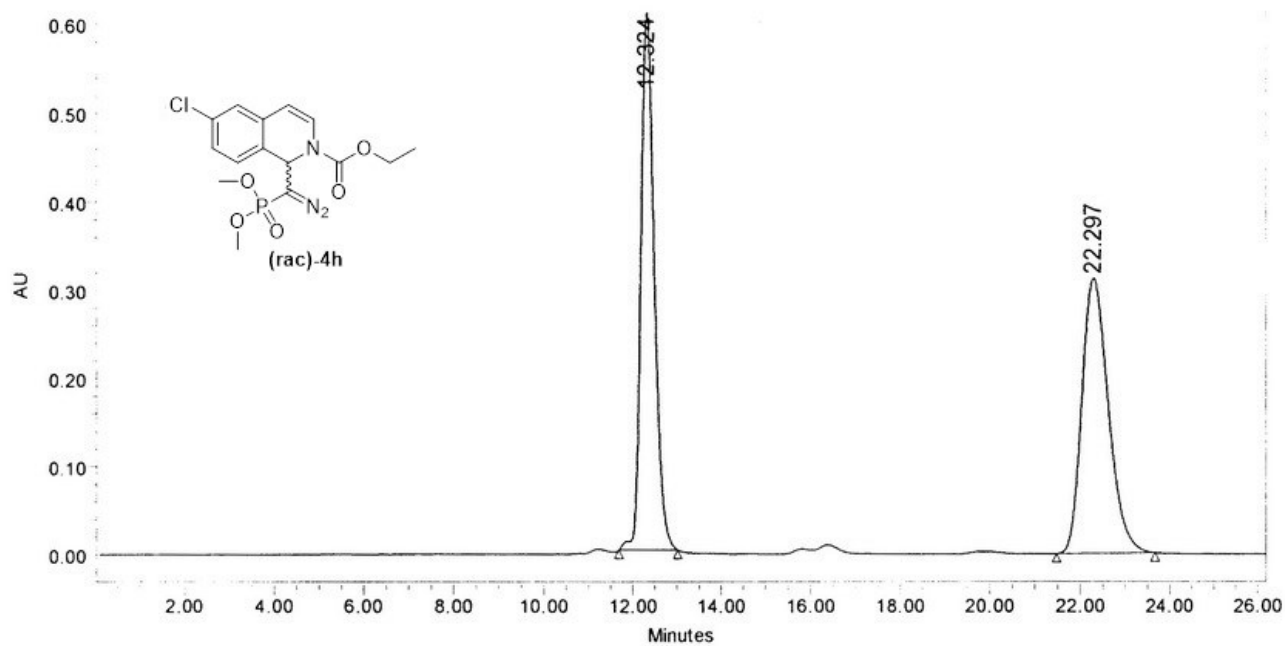

|   | RT<br>(min) | Area<br>( $\mu\text{V}\cdot\text{sec}$ ) | % Area | Height<br>( $\mu\text{V}$ ) | % Height |
|---|-------------|------------------------------------------|--------|-----------------------------|----------|
| 1 | 12.324      | 12654519                                 | 49.93  | 608416                      | 66.08    |
| 2 | 22.297      | 12688128                                 | 50.07  | 312298                      | 33.92    |

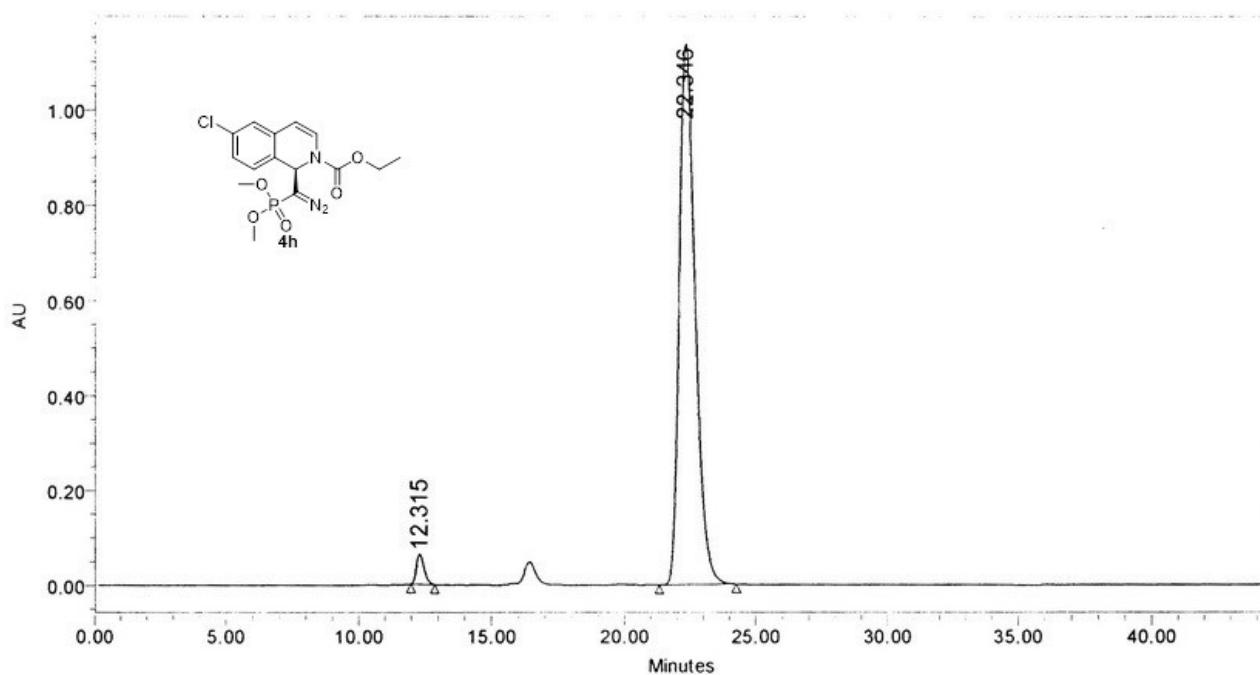

|   | RT<br>(min) | Area<br>( $\mu\text{V}\cdot\text{sec}$ ) | % Area | Height<br>( $\mu\text{V}$ ) | % Height |
|---|-------------|------------------------------------------|--------|-----------------------------|----------|
| 1 | 12.315      | 1275955                                  | 2.59   | 63506                       | 5.29     |
| 2 | 22.346      | 47979687                                 | 97.41  | 1137018                     | 94.71    |

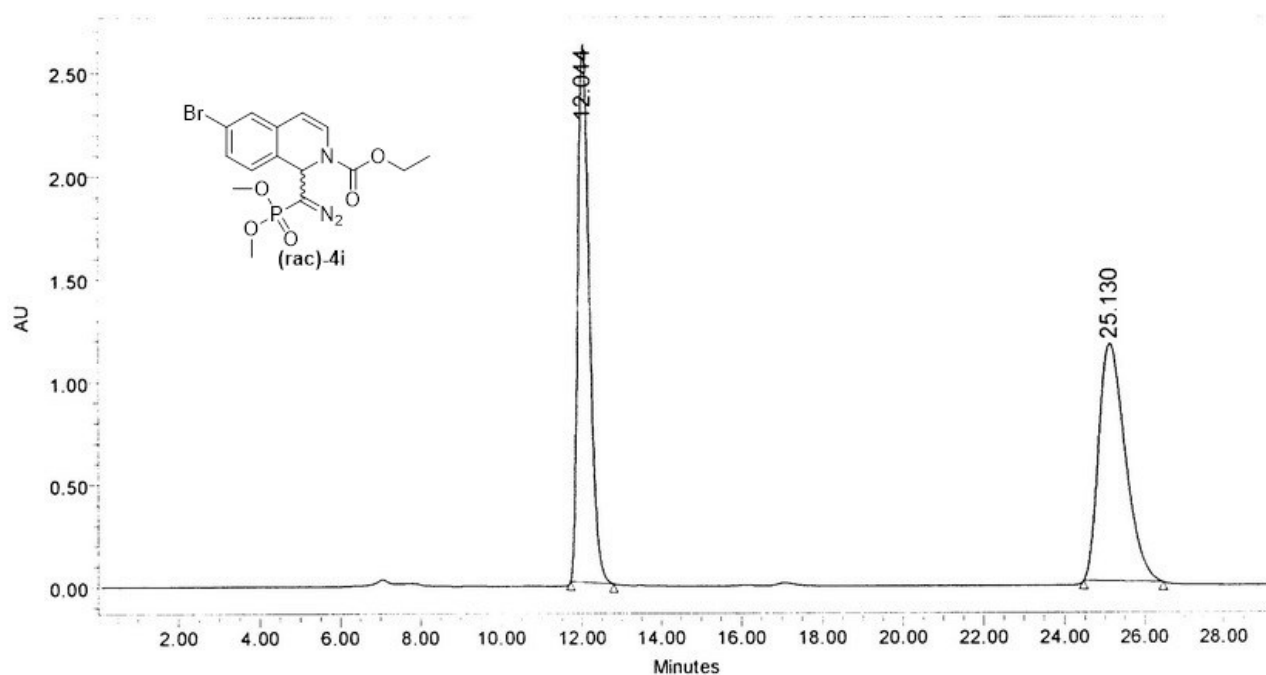

|   | RT<br>(min) | Area<br>(μV*sec) | % Area | Height<br>(μV) | % Height |
|---|-------------|------------------|--------|----------------|----------|
| 1 | 12.044      | 53157029         | 49.71  | 2615496        | 69.29    |
| 2 | 25.130      | 53767155         | 50.29  | 1159302        | 30.71    |

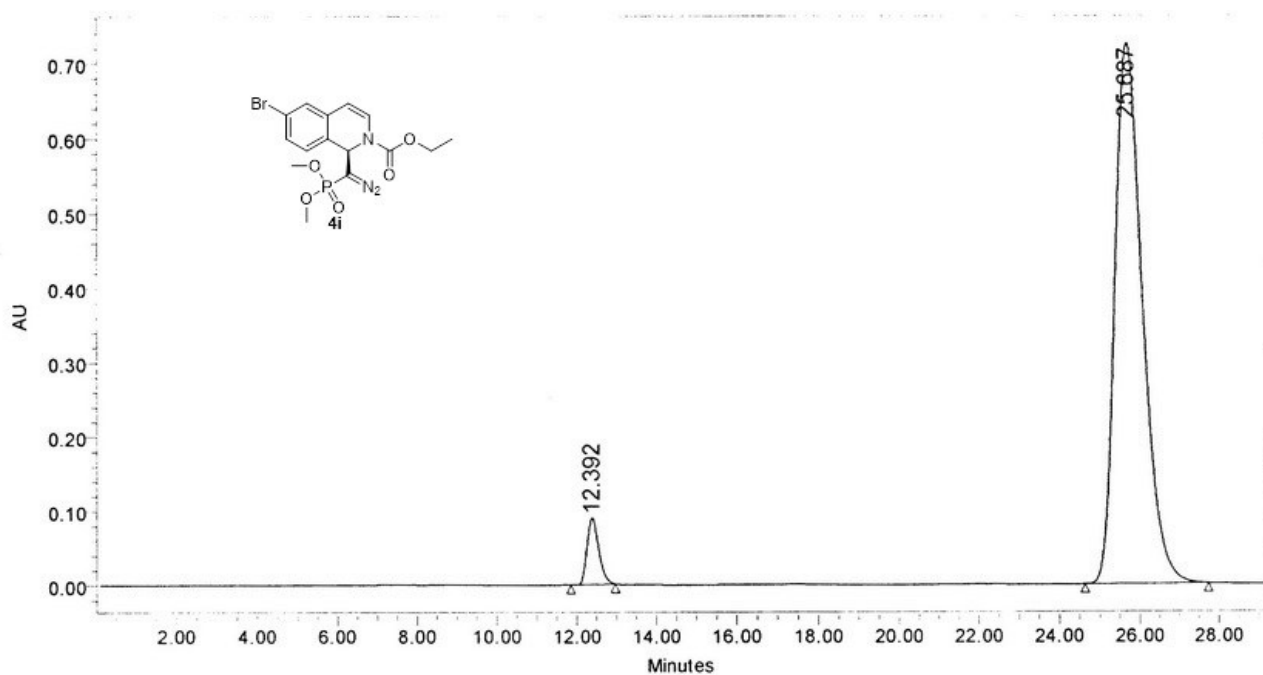

|   | RT<br>(min) | Area<br>(μV*sec) | % Area | Height<br>(μV) | % Height |
|---|-------------|------------------|--------|----------------|----------|
| 1 | 12.392      | 1819405          | 4.98   | 89553          | 10.98    |
| 2 | 25.687      | 34745156         | 95.02  | 725987         | 89.02    |

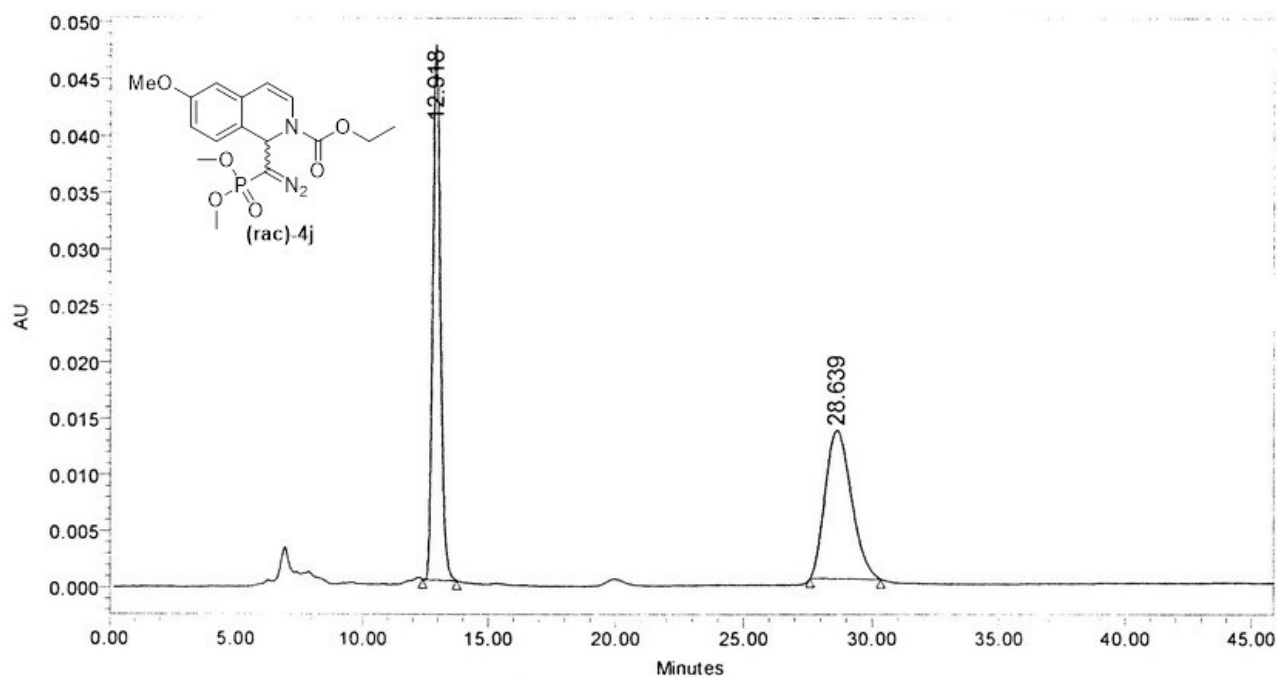

|   | RT<br>(min) | Area<br>(μV*sec) | % Area | Height<br>(μV) | %<br>Height |
|---|-------------|------------------|--------|----------------|-------------|
| 1 | 12.918      | 1013269          | 52.20  | 47338          | 78.23       |
| 2 | 28.639      | 927761           | 47.80  | 13173          | 21.77       |

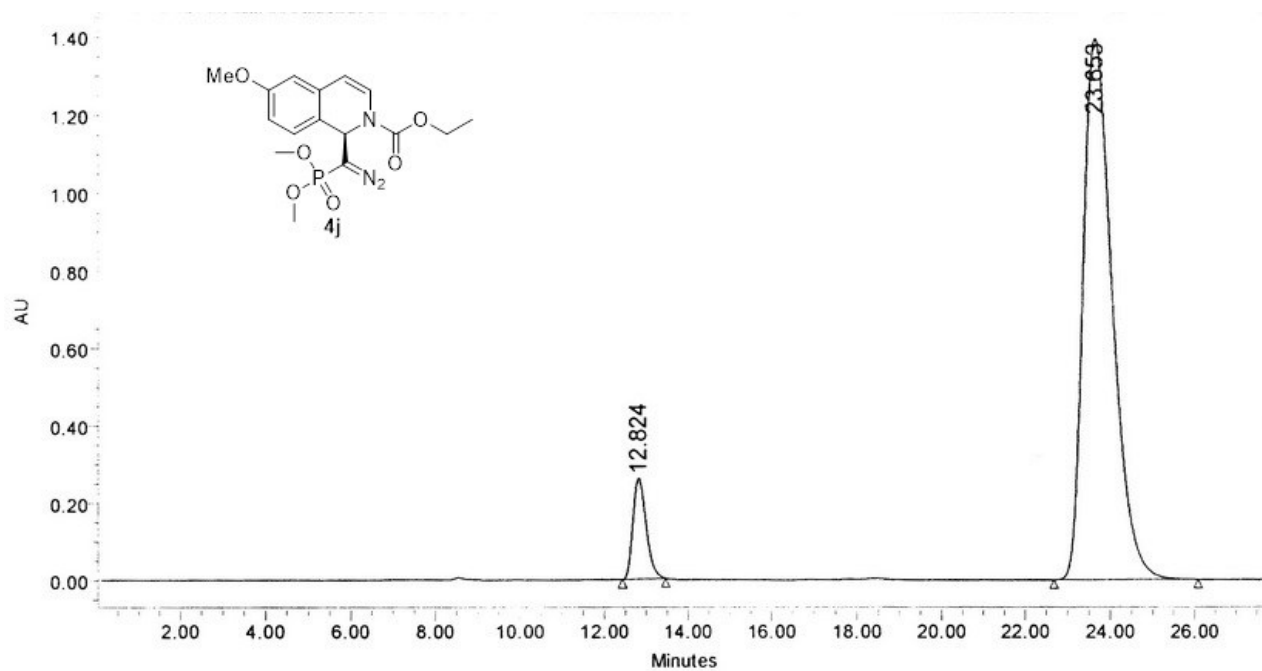

|   | RT<br>(min) | Area<br>(μV*sec) | % Area | Height<br>(μV) | %<br>Height |
|---|-------------|------------------|--------|----------------|-------------|
| 1 | 12.824      | 5703693          | 7.97   | 261177         | 15.77       |
| 2 | 23.653      | 65882670         | 92.03  | 1395001        | 84.23       |

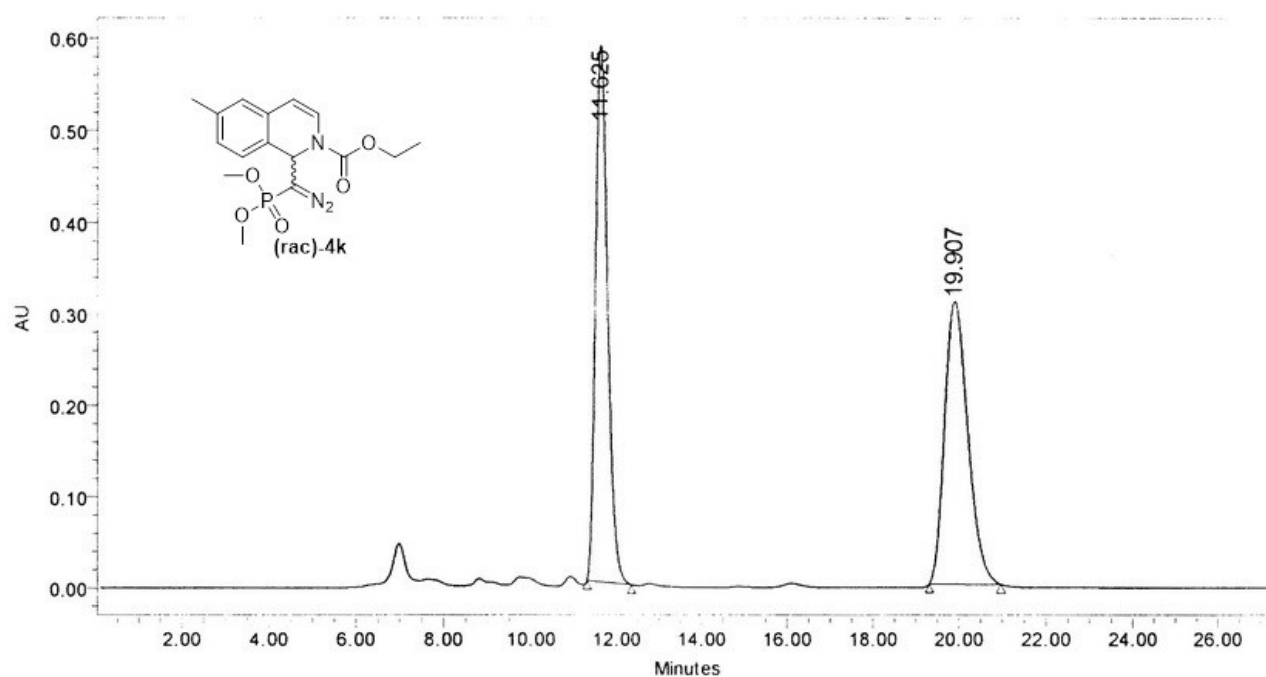

|   | RT<br>(min) | Area<br>( $\mu\text{V}\cdot\text{sec}$ ) | % Area | Height<br>( $\mu\text{V}$ ) | % Height |
|---|-------------|------------------------------------------|--------|-----------------------------|----------|
| 1 | 11.625      | 11674668                                 | 50.26  | 587484                      | 65.47    |
| 2 | 19.907      | 11555853                                 | 49.74  | 309824                      | 34.53    |

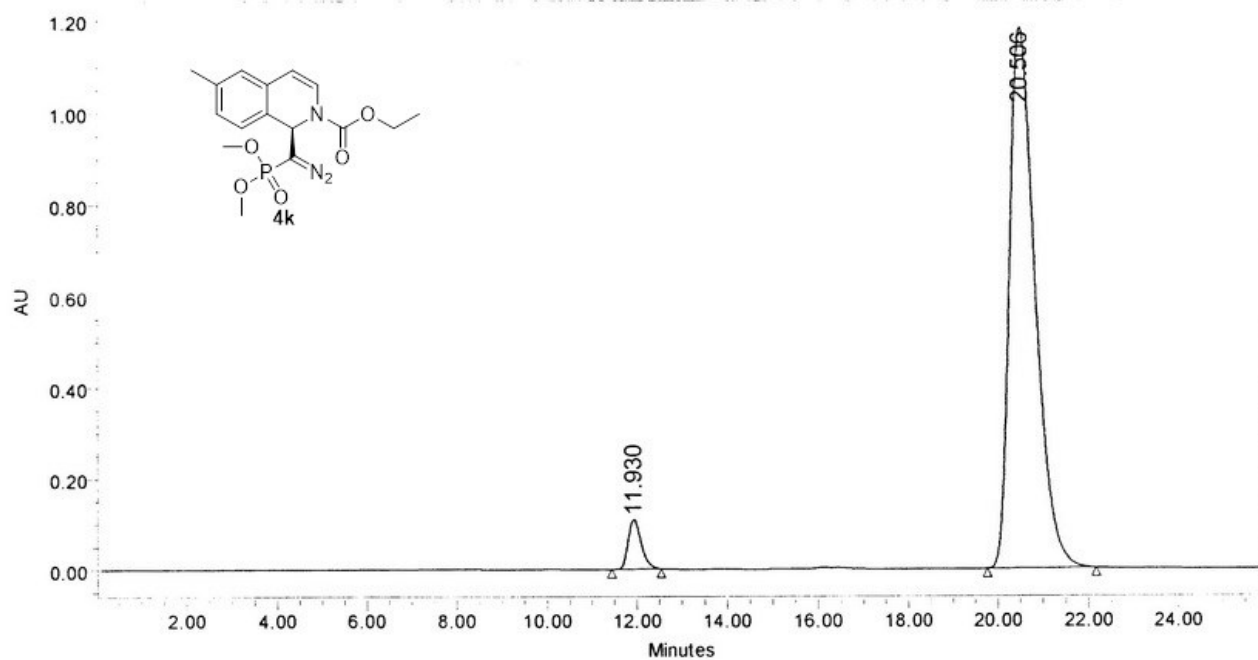

|   | RT<br>(min) | Area<br>( $\mu\text{V}\cdot\text{sec}$ ) | % Area | Height<br>( $\mu\text{V}$ ) | % Height |
|---|-------------|------------------------------------------|--------|-----------------------------|----------|
| 1 | 11.930      | 2183601                                  | 4.48   | 108976                      | 8.44     |
| 2 | 20.506      | 46578094                                 | 95.52  | 1182839                     | 91.56    |



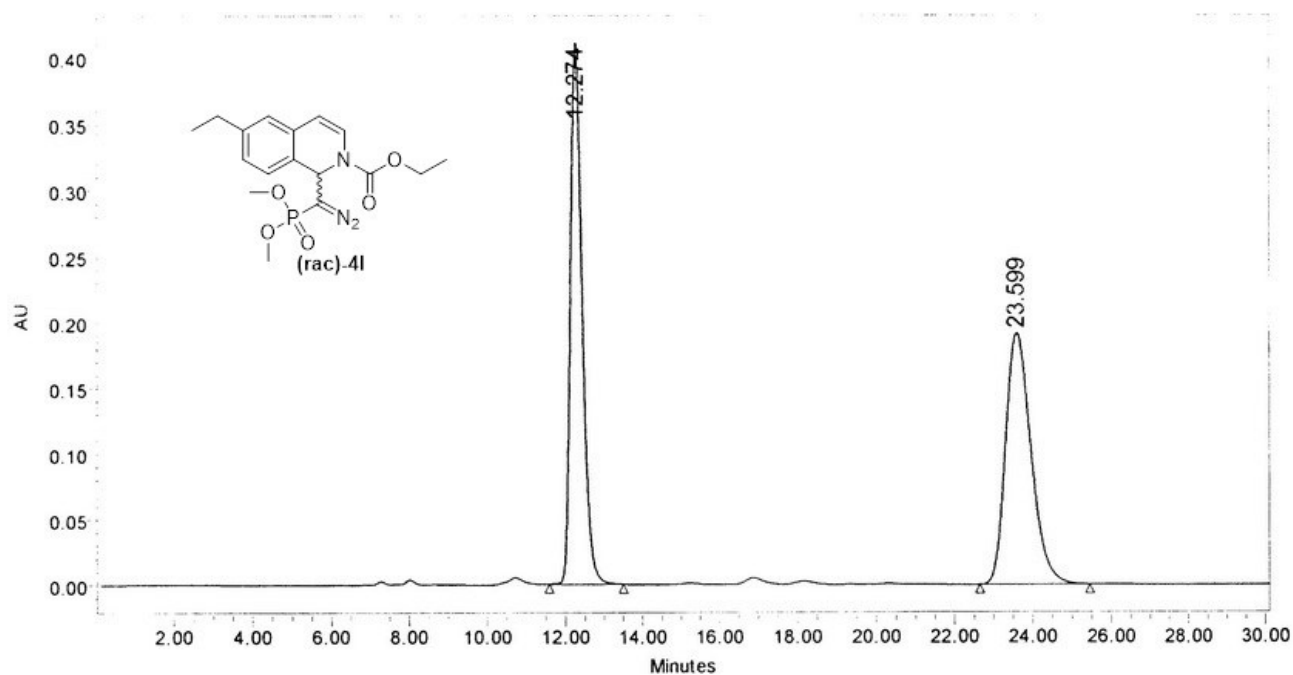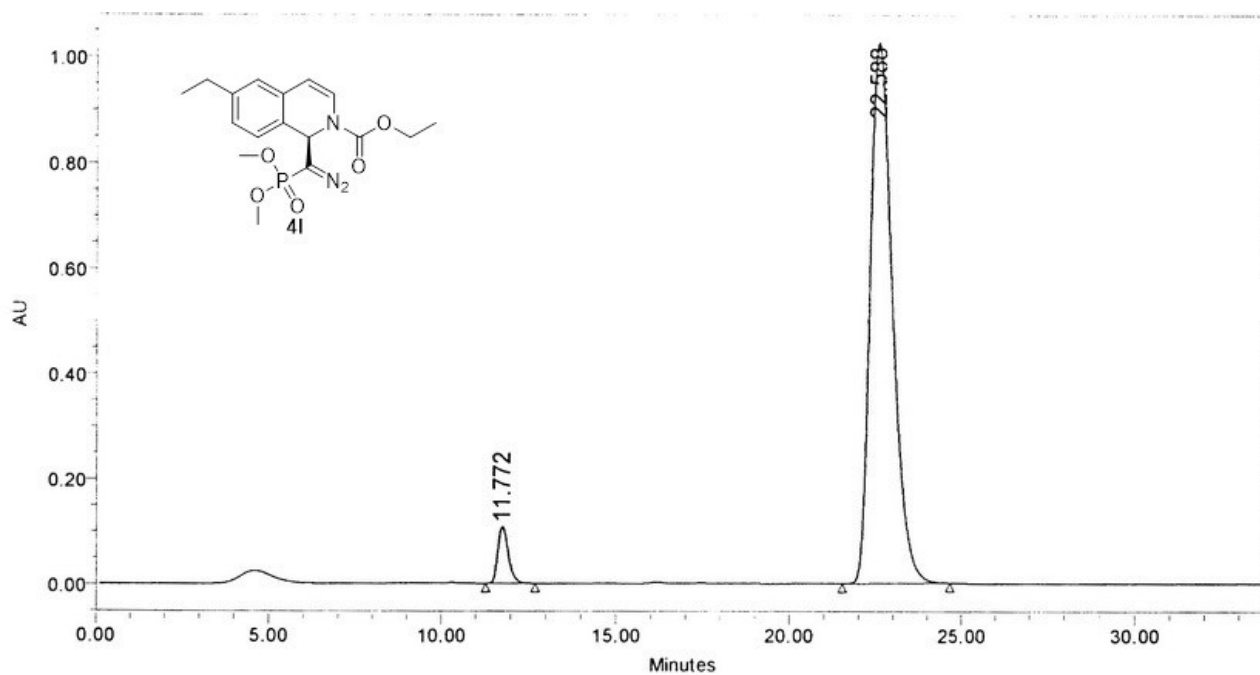

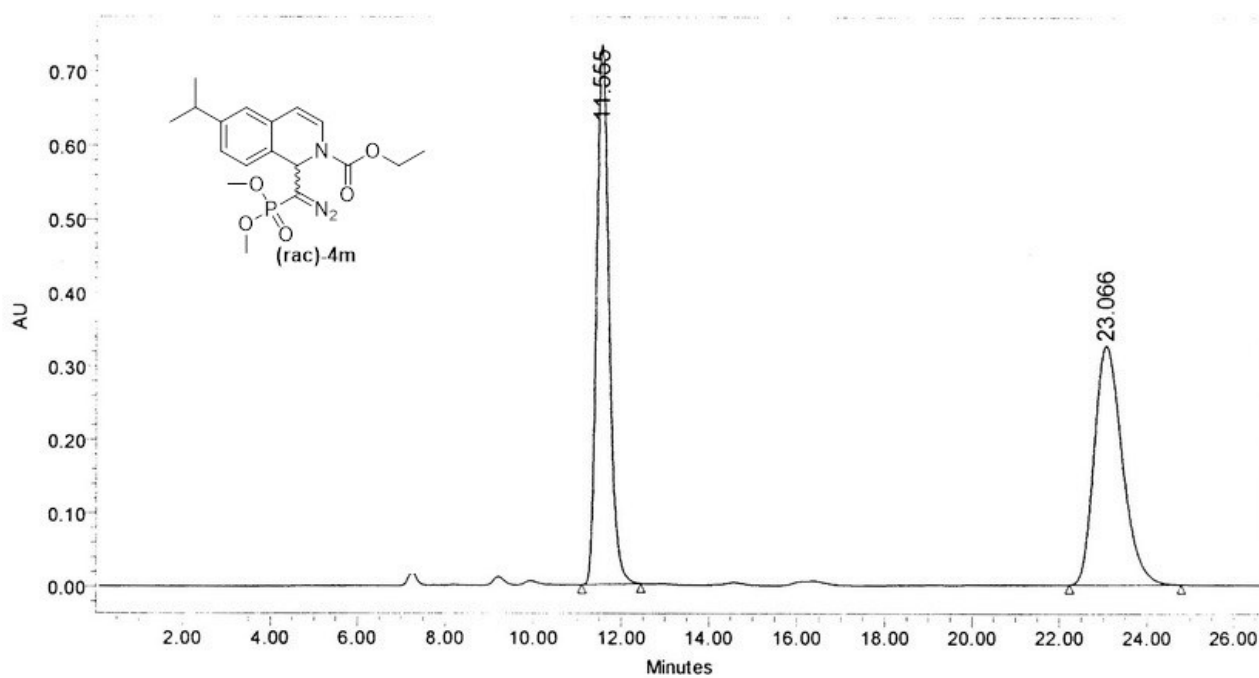

|   | RT<br>(min) | Area<br>( $\mu\text{V}\cdot\text{sec}$ ) | % Area | Height<br>( $\mu\text{V}$ ) | % Height |
|---|-------------|------------------------------------------|--------|-----------------------------|----------|
| 1 | 11.555      | 14438790                                 | 49.82  | 734375                      | 69.26    |
| 2 | 23.066      | 14545772                                 | 50.18  | 325887                      | 30.74    |

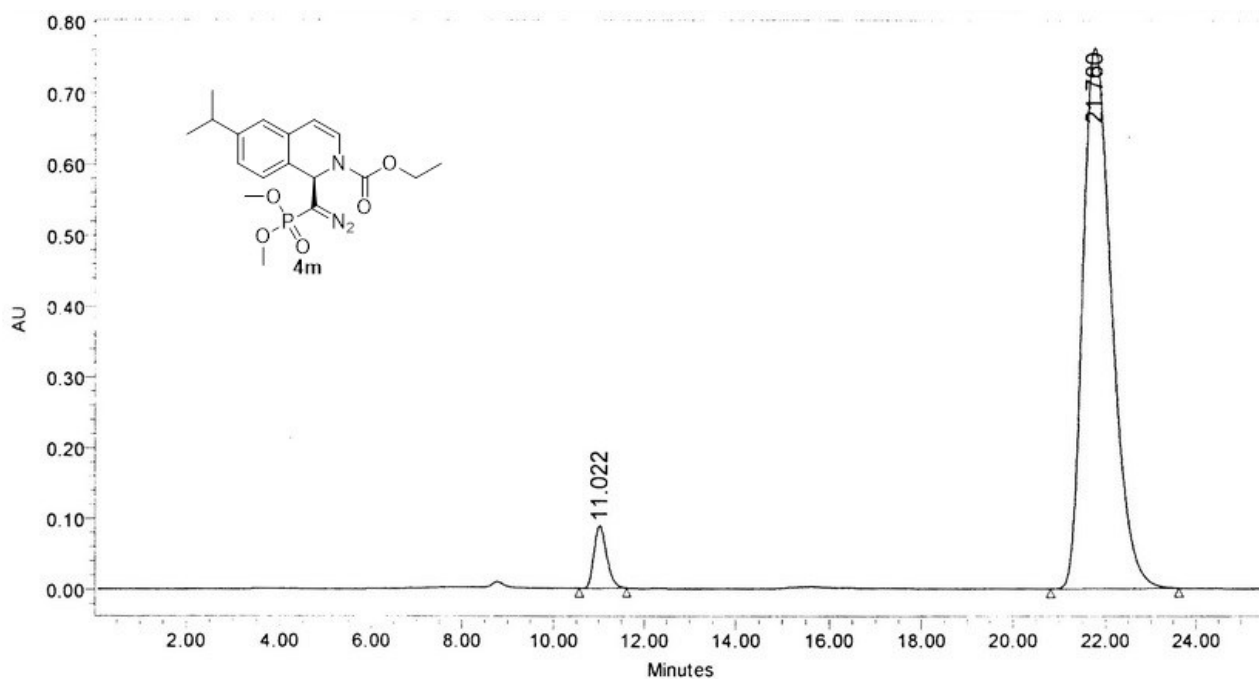

|   | RT<br>(min) | Area<br>( $\mu\text{V}\cdot\text{sec}$ ) | % Area | Height<br>( $\mu\text{V}$ ) | % Height |
|---|-------------|------------------------------------------|--------|-----------------------------|----------|
| 1 | 11.022      | 1713911                                  | 4.89   | 88569                       | 10.40    |
| 2 | 21.760      | 33322932                                 | 95.11  | 763434                      | 89.60    |

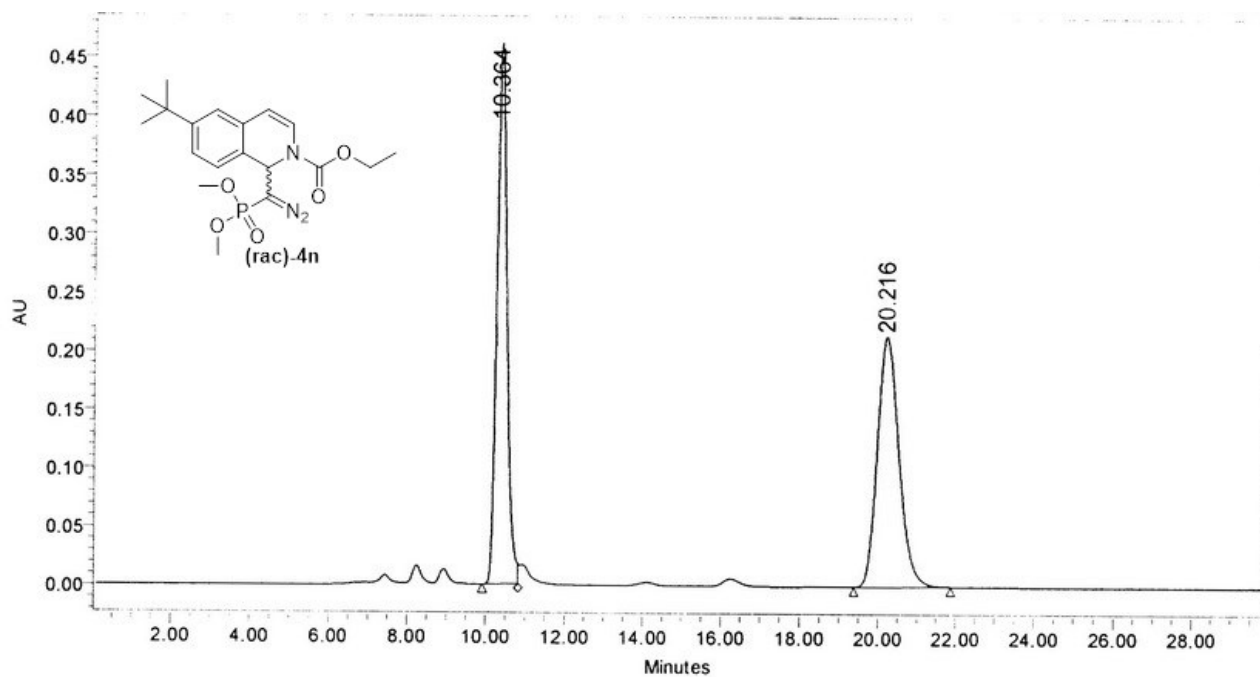

|   | RT<br>(min) | Area<br>( $\mu\text{V}\cdot\text{sec}$ ) | % Area | Height<br>( $\mu\text{V}$ ) | % Height |
|---|-------------|------------------------------------------|--------|-----------------------------|----------|
| 1 | 10.364      | 8139966                                  | 49.58  | 461399                      | 68.26    |
| 2 | 20.216      | 8277166                                  | 50.42  | 214498                      | 31.74    |

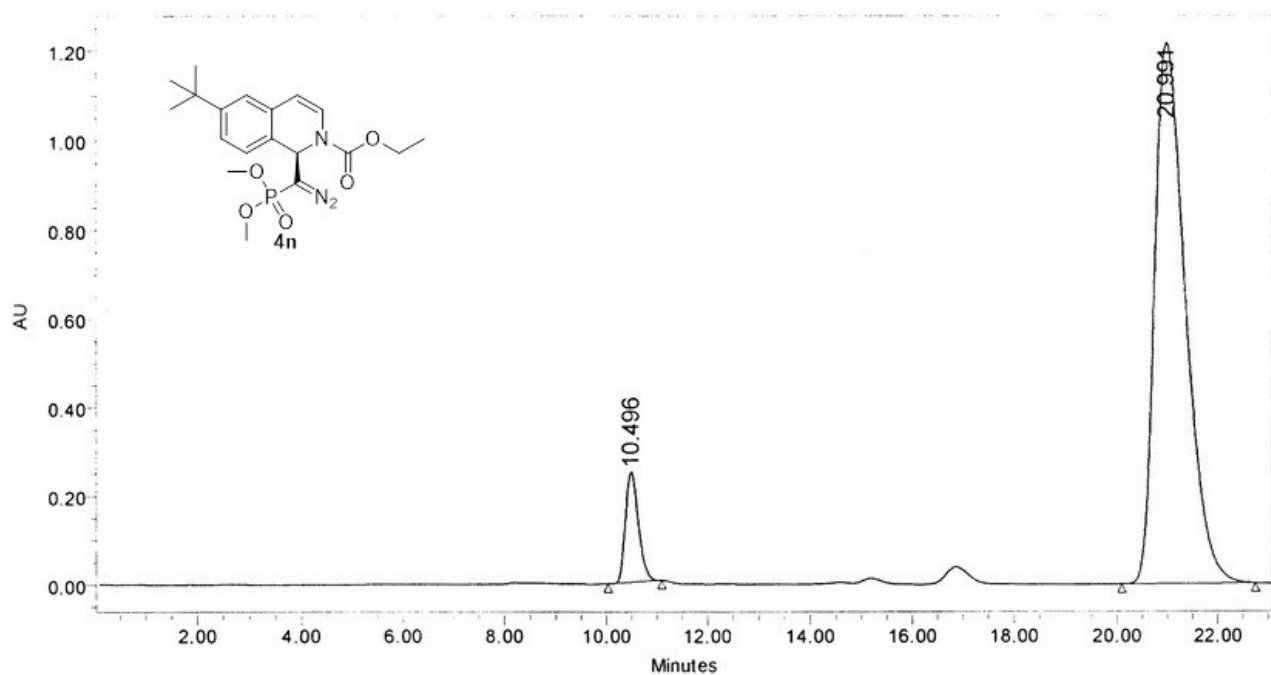

|   | RT<br>(min) | Area<br>( $\mu\text{V}\cdot\text{sec}$ ) | % Area | Height<br>( $\mu\text{V}$ ) | % Height |
|---|-------------|------------------------------------------|--------|-----------------------------|----------|
| 1 | 10.496      | 4467983                                  | 7.93   | 249473                      | 17.01    |
| 2 | 20.991      | 51893896                                 | 92.07  | 1217015                     | 82.99    |

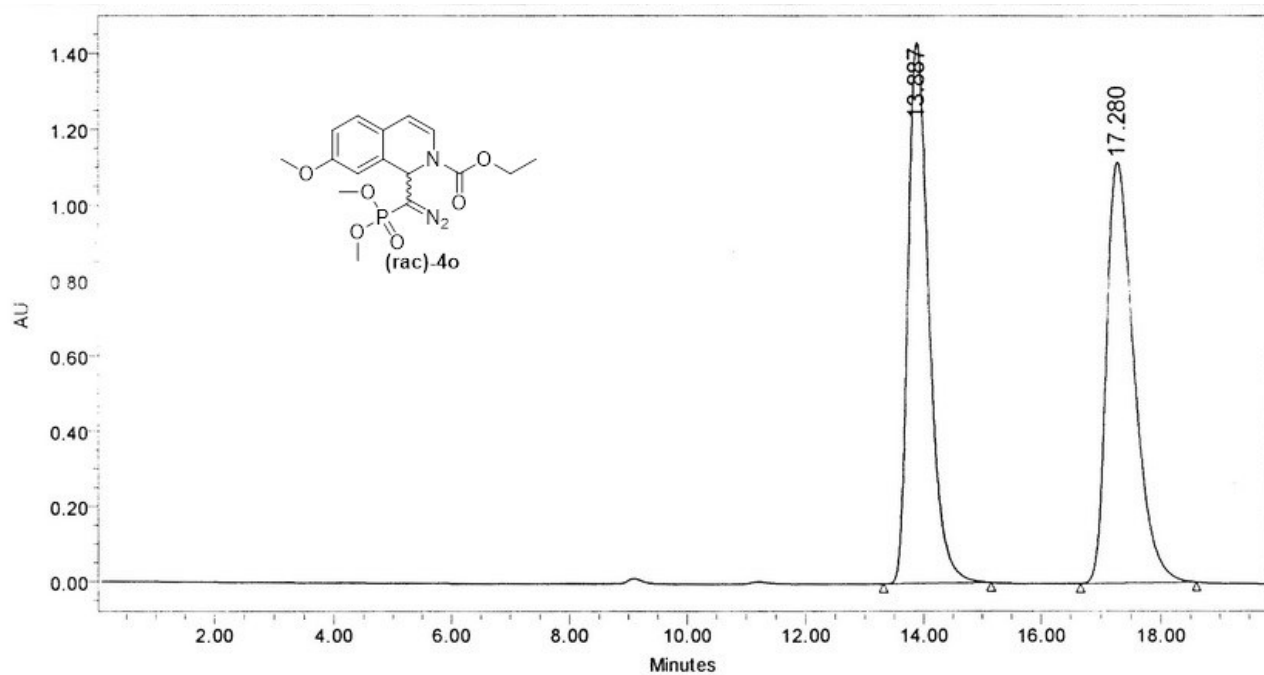

|   | RT<br>(min) | Area<br>(μV*sec) | % Area | Height<br>(μV) | %<br>Height |
|---|-------------|------------------|--------|----------------|-------------|
| 1 | 13.887      | 35595878         | 50.07  | 1433369        | 56.16       |
| 2 | 17.280      | 35499389         | 49.93  | 1119014        | 43.84       |

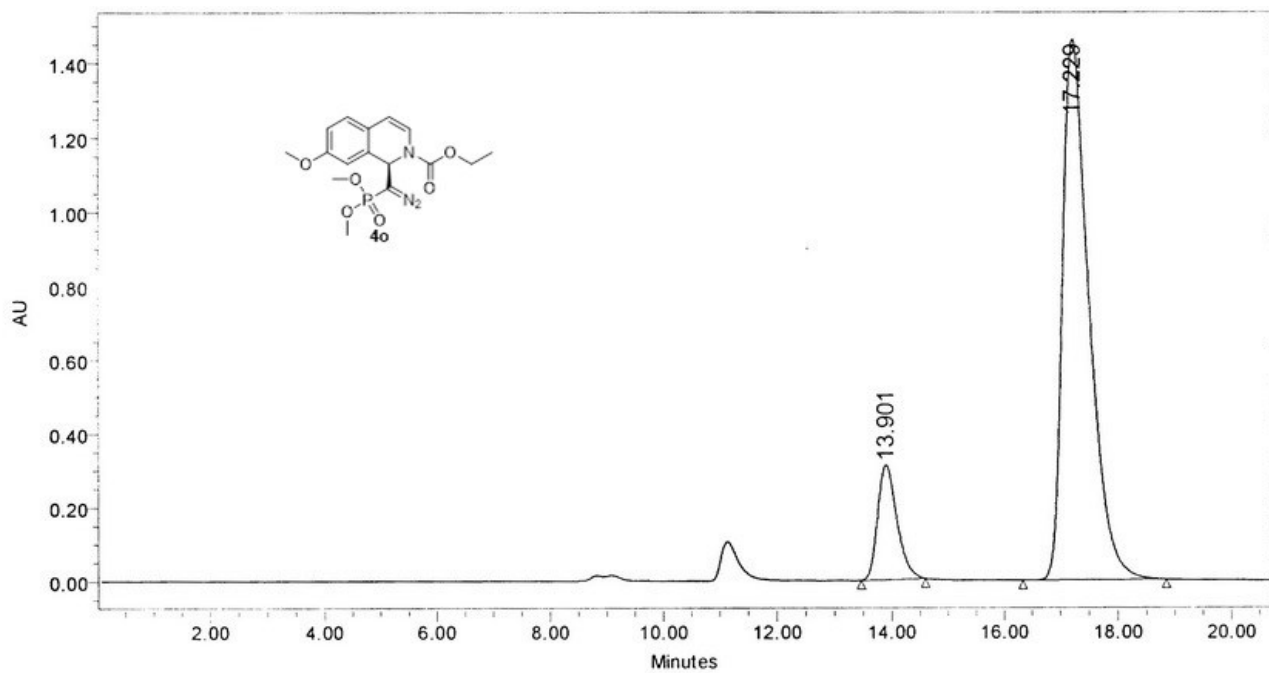

|   | RT<br>(min) | Area<br>(μV*sec) | % Area | Height<br>(μV) | %<br>Height |
|---|-------------|------------------|--------|----------------|-------------|
| 1 | 13.901      | 7333411          | 13.50  | 311193         | 17.56       |
| 2 | 17.229      | 46968304         | 86.50  | 1461238        | 82.44       |

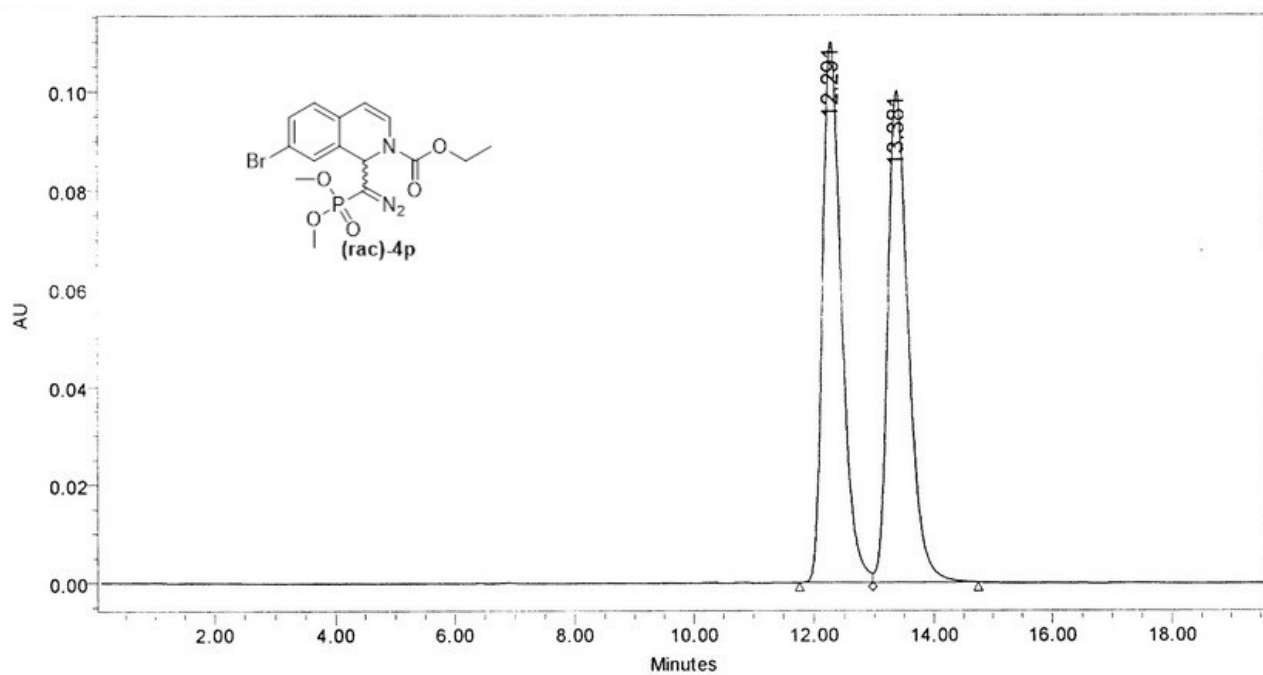

|   | RT<br>(min) | Area<br>( $\mu\text{V}\cdot\text{sec}$ ) | % Area | Height<br>( $\mu\text{V}$ ) | % Height |
|---|-------------|------------------------------------------|--------|-----------------------------|----------|
| 1 | 12.291      | 2373655                                  | 49.66  | 110079                      | 52.37    |
| 2 | 13.381      | 2405857                                  | 50.34  | 100129                      | 47.63    |

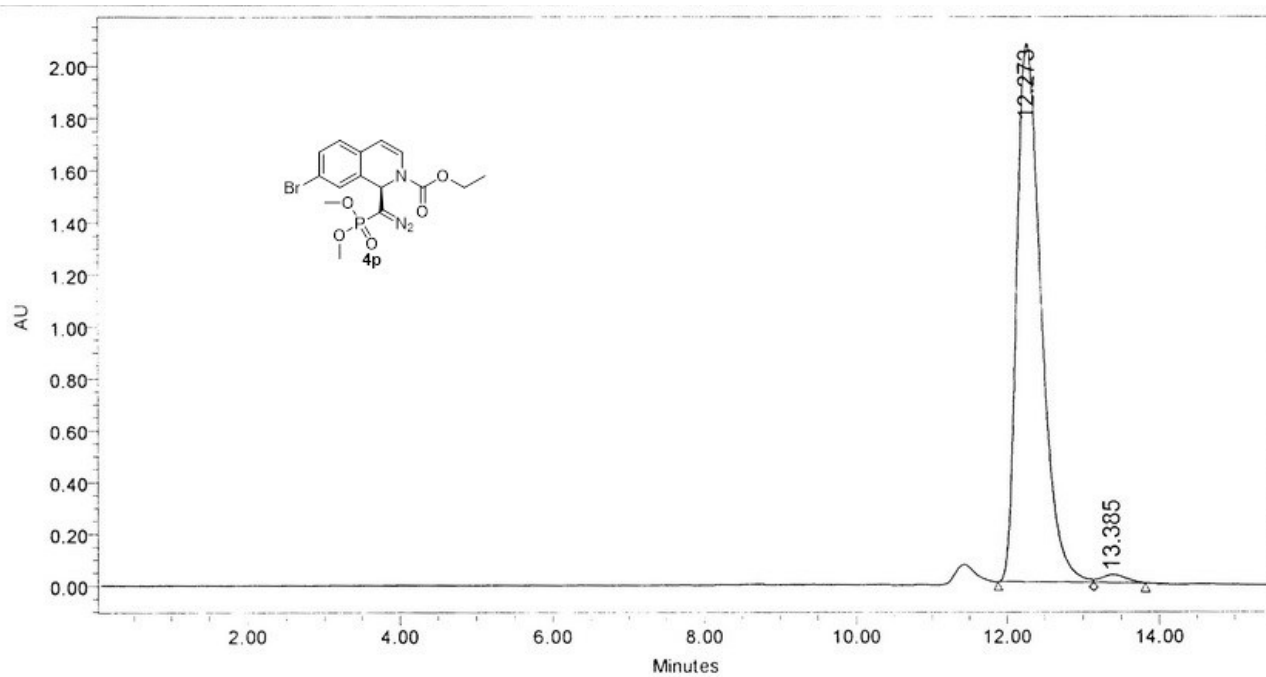

|   | RT<br>(min) | Area<br>( $\mu\text{V}\cdot\text{sec}$ ) | % Area | Height<br>( $\mu\text{V}$ ) | % Height |
|---|-------------|------------------------------------------|--------|-----------------------------|----------|
| 1 | 12.273      | 46513641                                 | 98.56  | 2072708                     | 98.56    |
| 2 | 13.385      | 681511                                   | 1.44   | 30384                       | 1.44     |

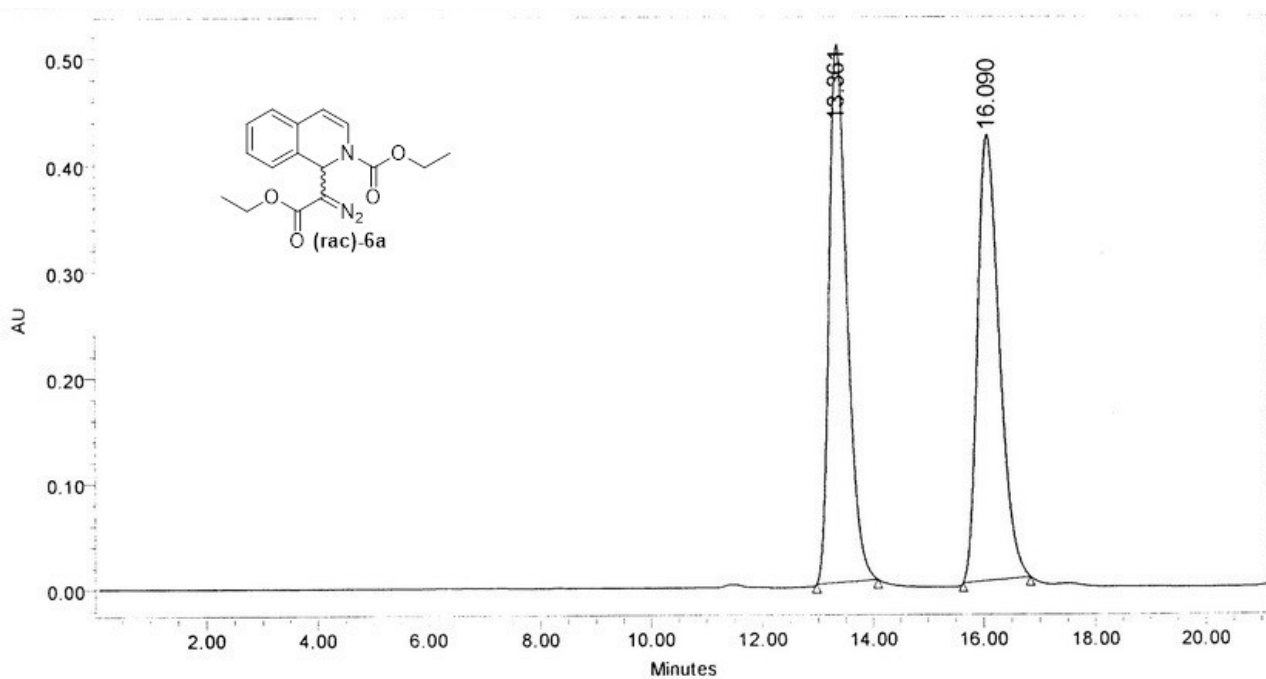

|   | RT<br>(min) | Area<br>( $\mu\text{V}\cdot\text{sec}$ ) | % Area | Height<br>( $\mu\text{V}$ ) | % Height |
|---|-------------|------------------------------------------|--------|-----------------------------|----------|
| 1 | 13.361      | 11454136                                 | 50.20  | 507403                      | 54.68    |
| 2 | 16.090      | 11361018                                 | 49.80  | 420594                      | 45.32    |

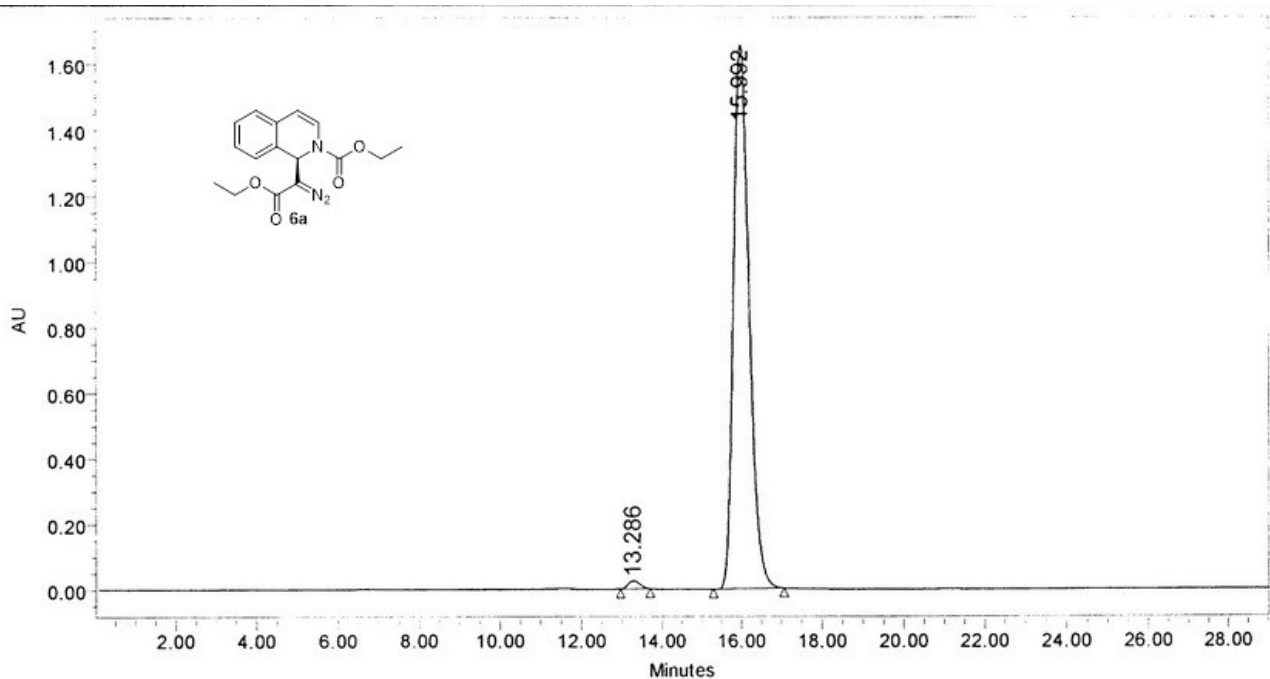

|   | RT<br>(min) | Area<br>( $\mu\text{V}\cdot\text{sec}$ ) | % Area | Height<br>( $\mu\text{V}$ ) | % Height |
|---|-------------|------------------------------------------|--------|-----------------------------|----------|
| 1 | 13.286      | 493901                                   | 1.08   | 24392                       | 1.45     |
| 2 | 15.992      | 45137226                                 | 98.92  | 1656874                     | 98.55    |

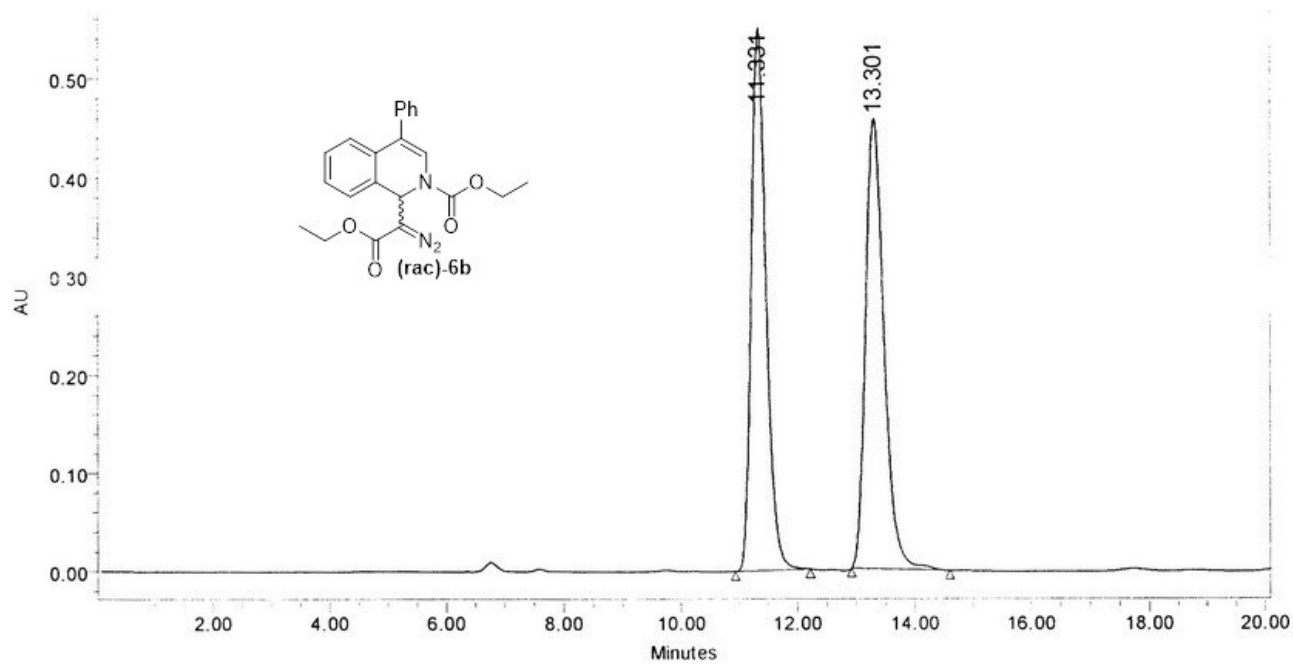

|   | RT<br>(min) | Area<br>( $\mu\text{V}\cdot\text{sec}$ ) | % Area | Height<br>( $\mu\text{V}$ ) | % Height |
|---|-------------|------------------------------------------|--------|-----------------------------|----------|
| 1 | 11.331      | 9727330                                  | 49.37  | 551205                      | 54.62    |
| 2 | 13.301      | 9974435                                  | 50.63  | 457866                      | 45.38    |

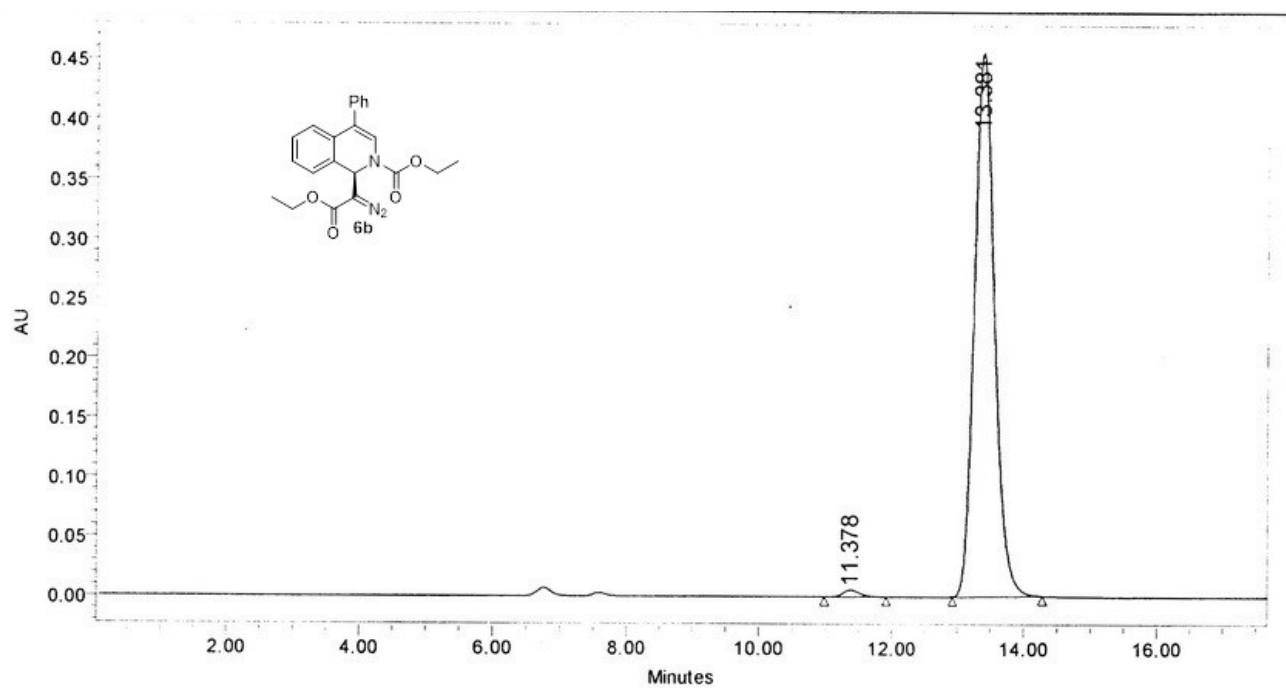

|   | RT<br>(min) | Area<br>( $\mu\text{V}\cdot\text{sec}$ ) | % Area | Height<br>( $\mu\text{V}$ ) | % Height |
|---|-------------|------------------------------------------|--------|-----------------------------|----------|
| 1 | 11.378      | 101717                                   | 1.05   | 5688                        | 1.23     |
| 2 | 13.381      | 9620576                                  | 98.95  | 456375                      | 98.77    |

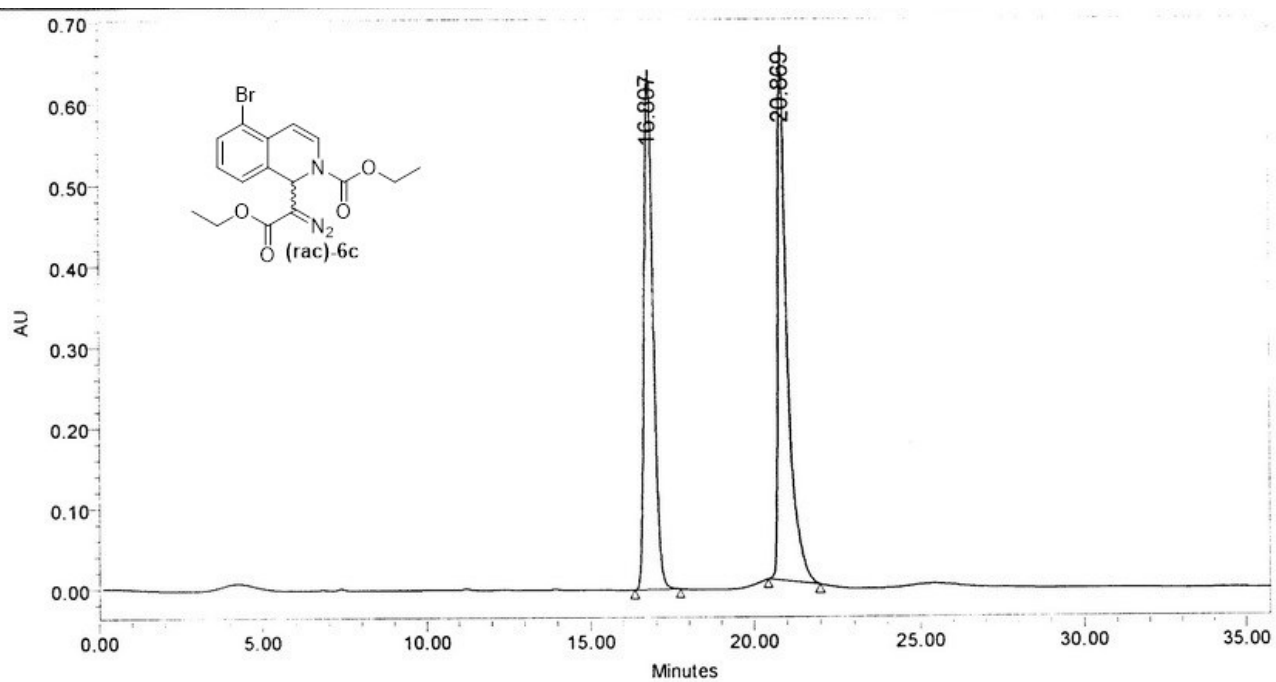

|   | RT<br>(min) | Area<br>( $\mu\text{V}\cdot\text{sec}$ ) | % Area | Height<br>( $\mu\text{V}$ ) | % Height |
|---|-------------|------------------------------------------|--------|-----------------------------|----------|
| 1 | 16.807      | 12203049                                 | 49.28  | 643810                      | 49.37    |
| 2 | 20.869      | 12561965                                 | 50.72  | 660201                      | 50.63    |

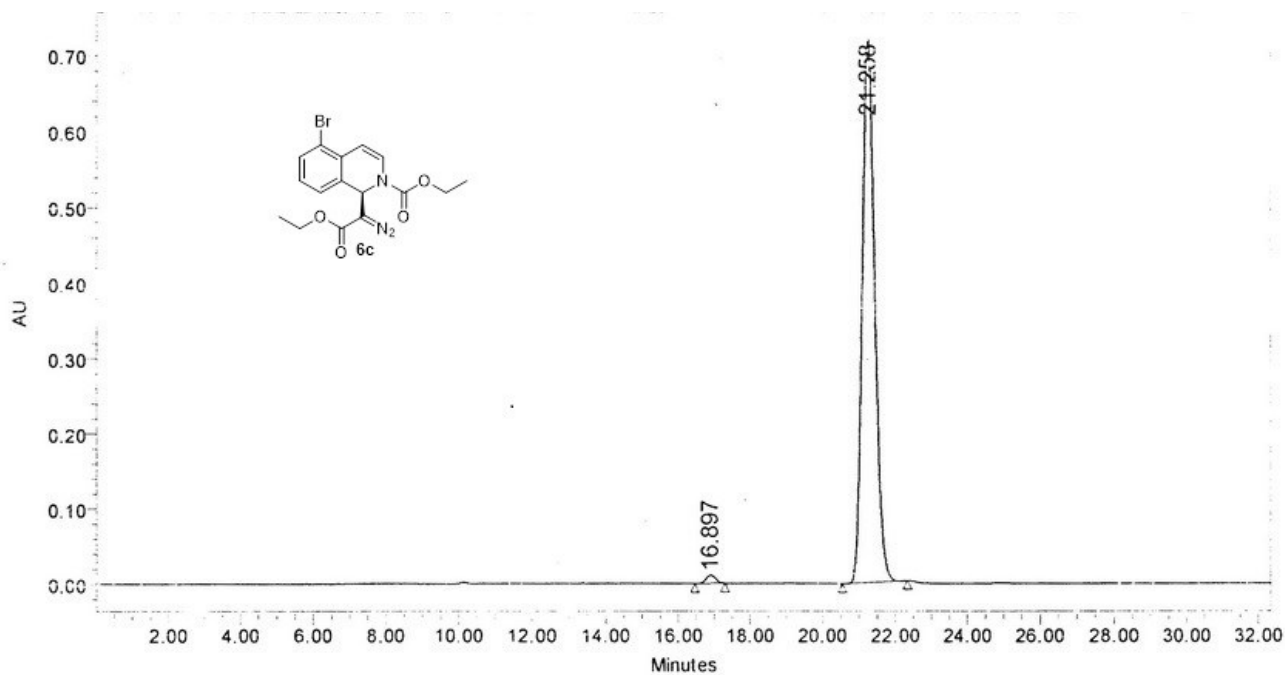

|   | RT<br>(min) | Area<br>( $\mu\text{V}\cdot\text{sec}$ ) | % Area | Height<br>( $\mu\text{V}$ ) | % Height |
|---|-------------|------------------------------------------|--------|-----------------------------|----------|
| 1 | 16.897      | 201393                                   | 1.16   | 11088                       | 1.52     |
| 2 | 21.258      | 17198209                                 | 98.84  | 720149                      | 98.48    |



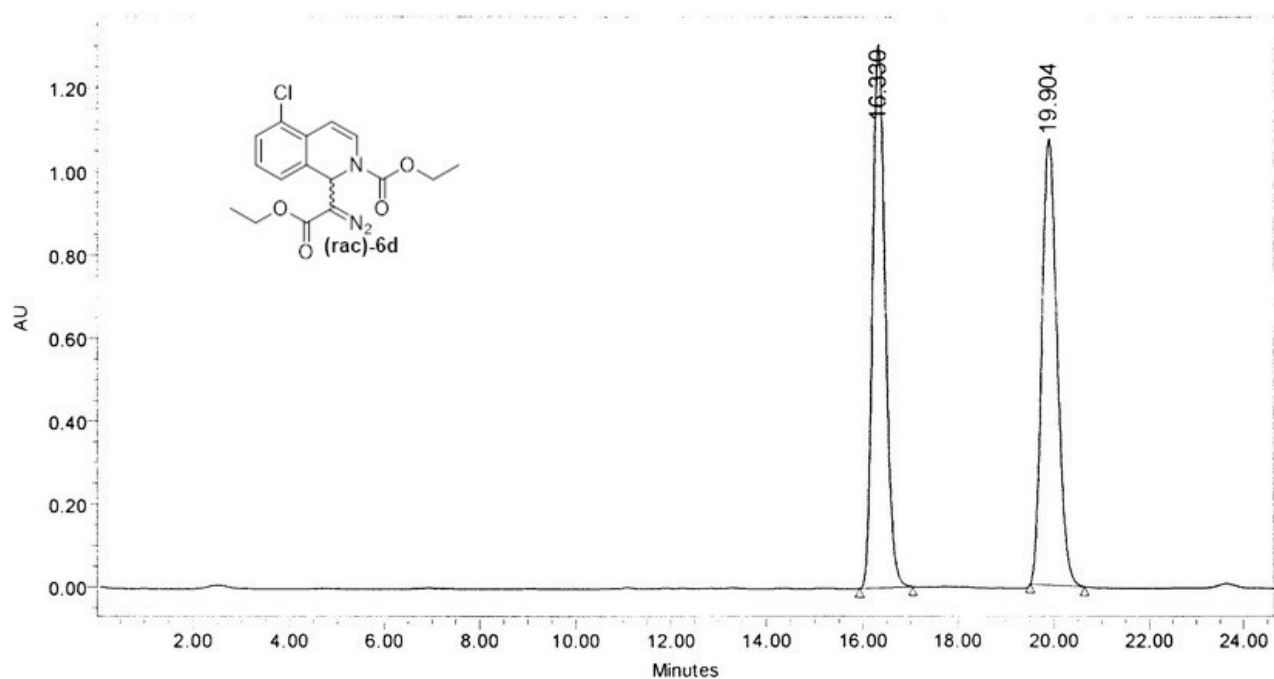

|   | RT<br>(min) | Area<br>( $\mu\text{V}\cdot\text{sec}$ ) | % Area | Height<br>( $\mu\text{V}$ ) | % Height |
|---|-------------|------------------------------------------|--------|-----------------------------|----------|
| 1 | 16.330      | 23984921                                 | 50.64  | 1307728                     | 54.86    |
| 2 | 19.904      | 23376633                                 | 49.36  | 1075998                     | 45.14    |

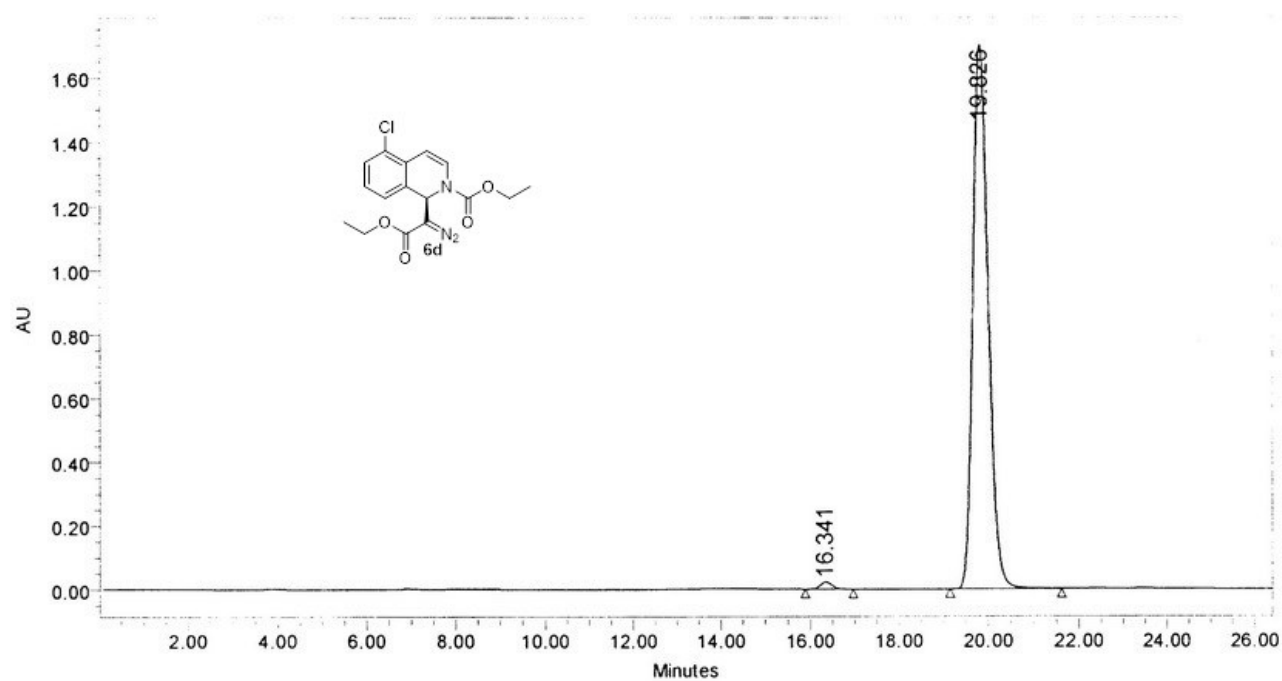

|   | RT<br>(min) | Area<br>( $\mu\text{V}\cdot\text{sec}$ ) | % Area | Height<br>( $\mu\text{V}$ ) | % Height |
|---|-------------|------------------------------------------|--------|-----------------------------|----------|
| 1 | 16.341      | 423487                                   | 1.05   | 22742                       | 1.32     |
| 2 | 19.826      | 40018345                                 | 98.95  | 1702831                     | 98.68    |

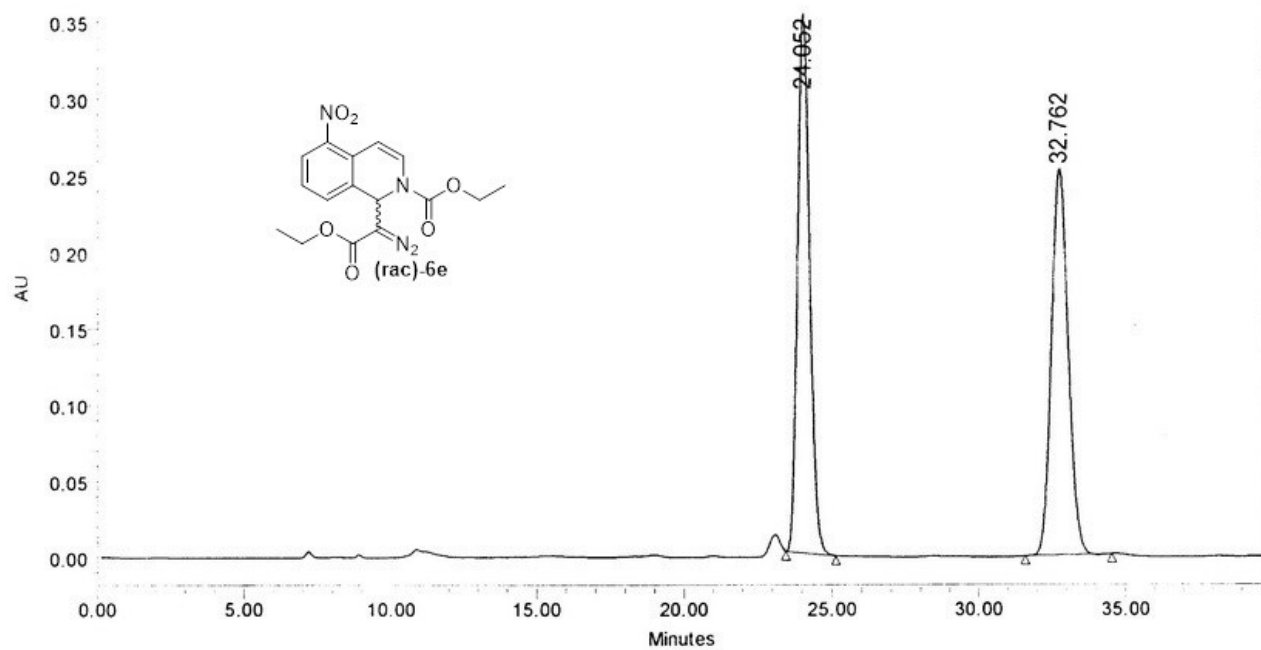

|   | RT<br>(min) | Area<br>( $\mu\text{V}\cdot\text{sec}$ ) | % Area | Height<br>( $\mu\text{V}$ ) | %<br>Height |
|---|-------------|------------------------------------------|--------|-----------------------------|-------------|
| 1 | 24.052      | 9928021                                  | 49.88  | 352861                      | 58.21       |
| 2 | 32.762      | 9977732                                  | 50.12  | 253345                      | 41.79       |

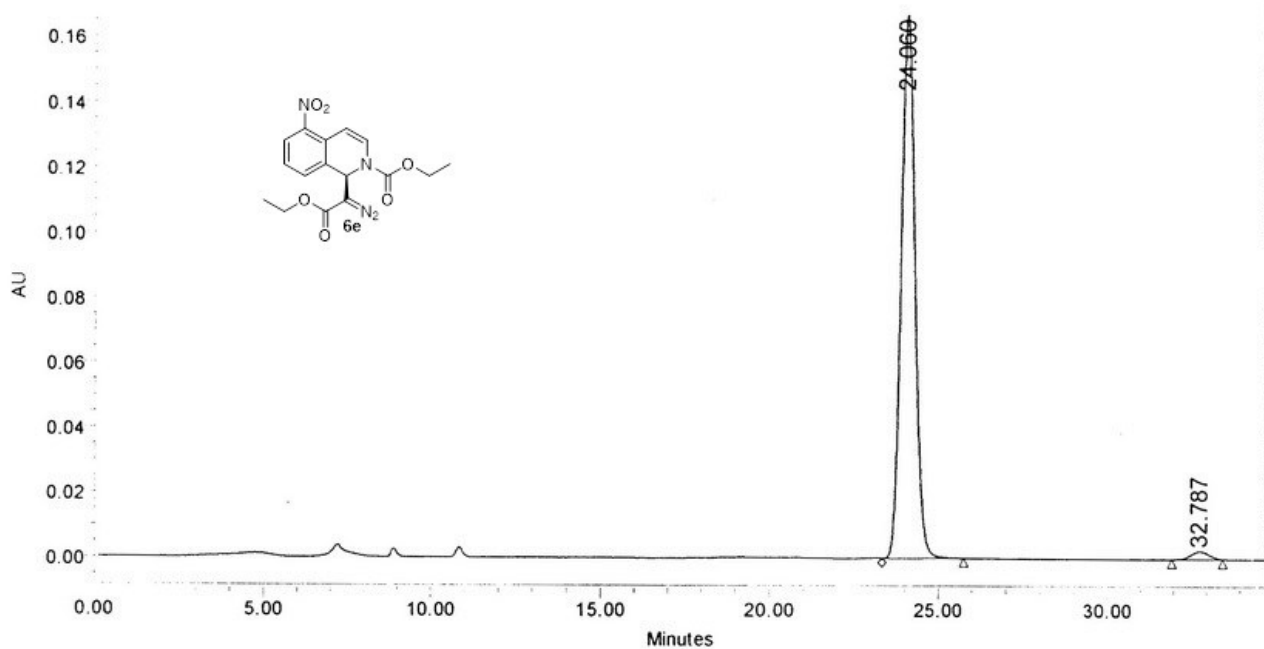

|   | RT<br>(min) | Area<br>( $\mu\text{V}\cdot\text{sec}$ ) | % Area | Height<br>( $\mu\text{V}$ ) | %<br>Height |
|---|-------------|------------------------------------------|--------|-----------------------------|-------------|
| 1 | 24.060      | 4761808                                  | 98.10  | 167443                      | 98.56       |
| 2 | 32.787      | 92329                                    | 1.90   | 2446                        | 1.44        |

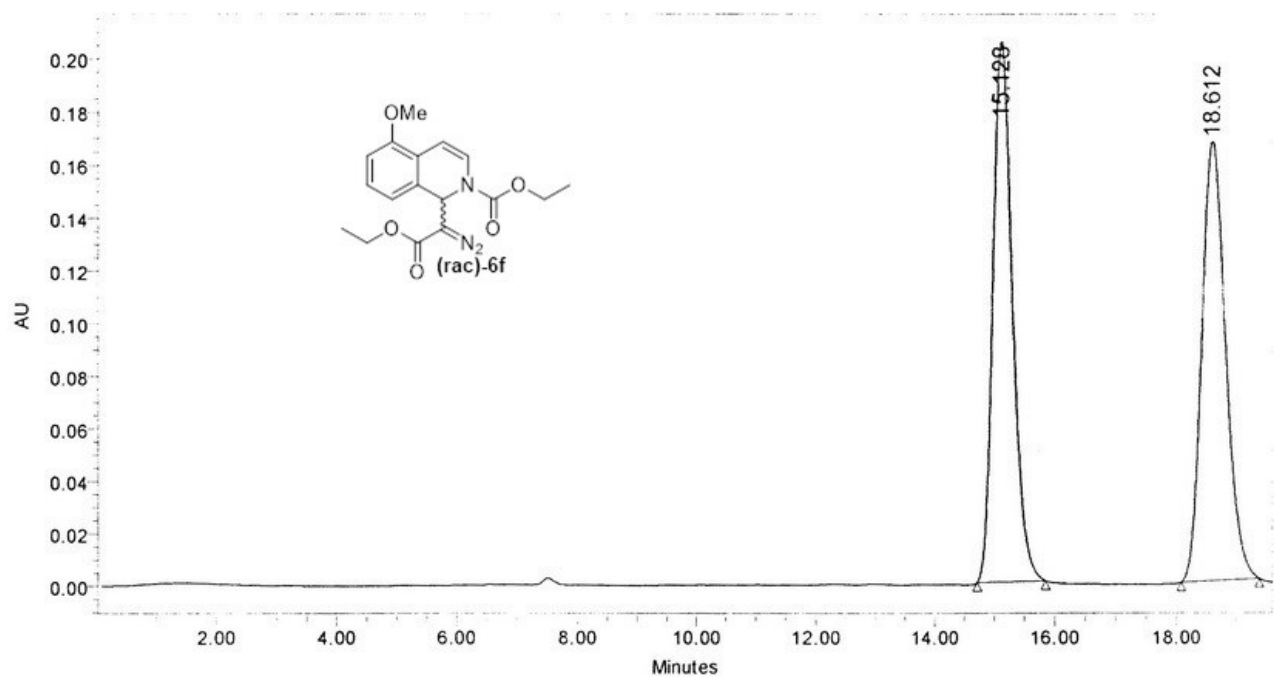

|   | RT<br>(min) | Area<br>( $\mu\text{V}\cdot\text{sec}$ ) | % Area | Height<br>( $\mu\text{V}$ ) | % Height |
|---|-------------|------------------------------------------|--------|-----------------------------|----------|
| 1 | 15.128      | 4608930                                  | 49.71  | 205288                      | 55.11    |
| 2 | 18.612      | 4663159                                  | 50.29  | 167248                      | 44.89    |

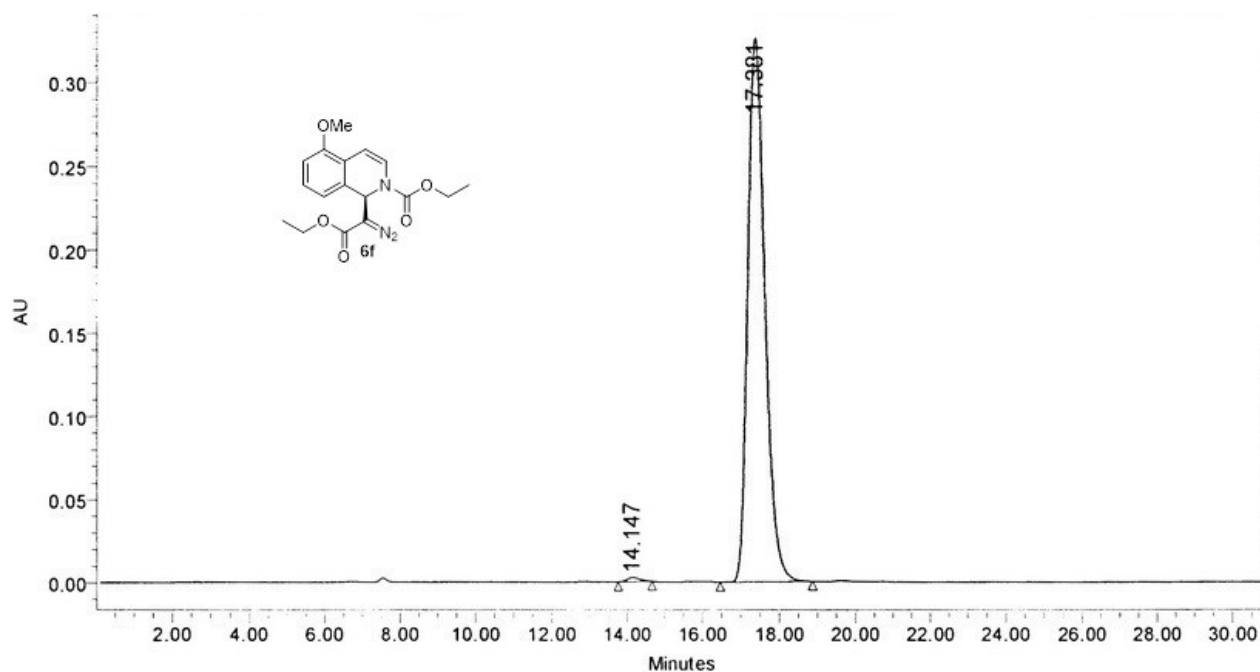

|   | RT<br>(min) | Area<br>( $\mu\text{V}\cdot\text{sec}$ ) | % Area | Height<br>( $\mu\text{V}$ ) | % Height |
|---|-------------|------------------------------------------|--------|-----------------------------|----------|
| 1 | 14.147      | 63189                                    | 0.63   | 2581                        | 0.78     |
| 2 | 17.381      | 9997091                                  | 99.37  | 326318                      | 99.22    |

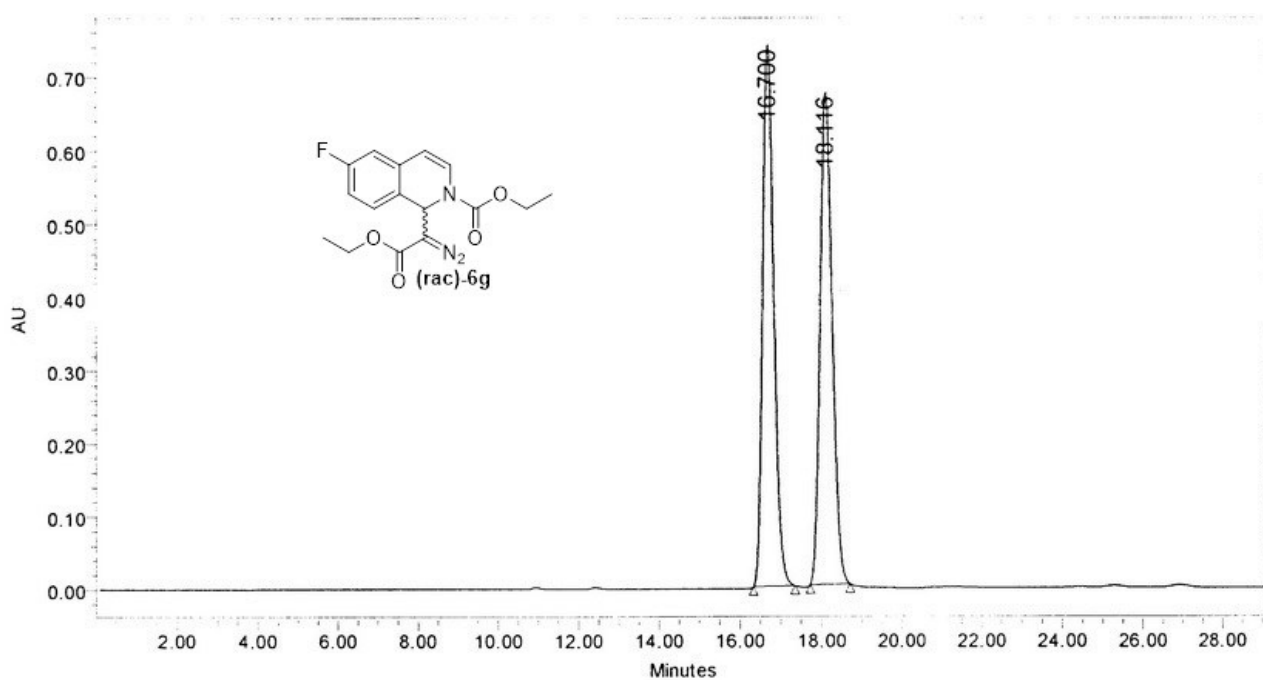

|   | RT<br>(min) | Area<br>(μV*sec) | % Area | Height<br>(μV) | %<br>Height |
|---|-------------|------------------|--------|----------------|-------------|
| 1 | 16.700      | 14010233         | 50.13  | 738788         | 52.35       |
| 2 | 18.116      | 13938529         | 49.87  | 672516         | 47.65       |

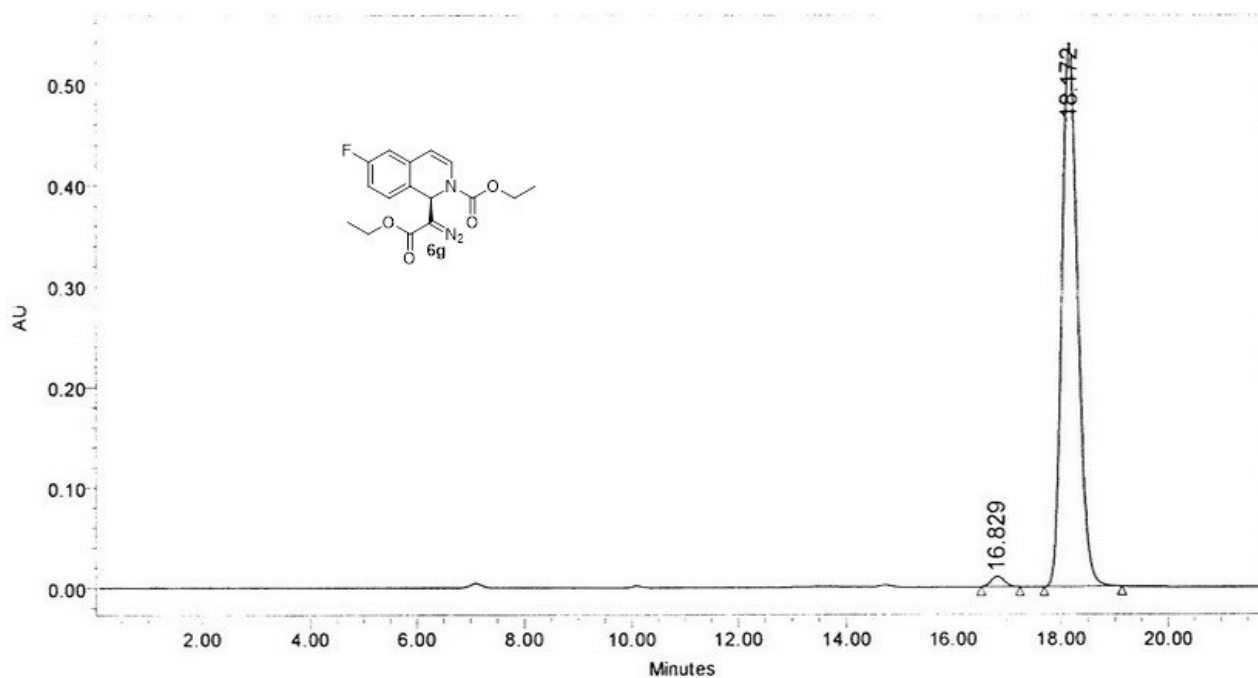

|   | RT<br>(min) | Area<br>(μV*sec) | % Area | Height<br>(μV) | %<br>Height |
|---|-------------|------------------|--------|----------------|-------------|
| 1 | 16.829      | 178371           | 1.62   | 10351          | 1.88        |
| 2 | 18.172      | 10864583         | 98.38  | 540093         | 98.12       |

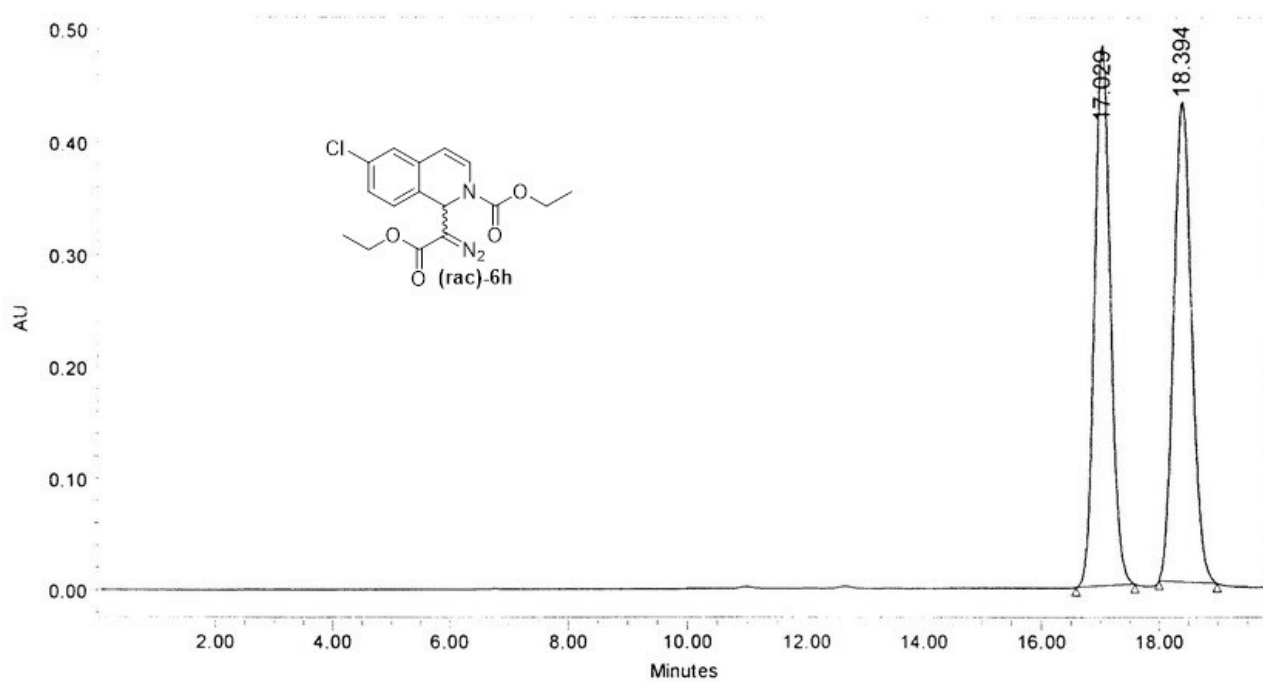

|   | RT<br>(min) | Area<br>( $\mu\text{V}\cdot\text{sec}$ ) | % Area | Height<br>( $\mu\text{V}$ ) | % Height |
|---|-------------|------------------------------------------|--------|-----------------------------|----------|
| 1 | 17.029      | 9034135                                  | 49.75  | 483158                      | 52.95    |
| 2 | 18.394      | 9126318                                  | 50.25  | 429396                      | 47.05    |

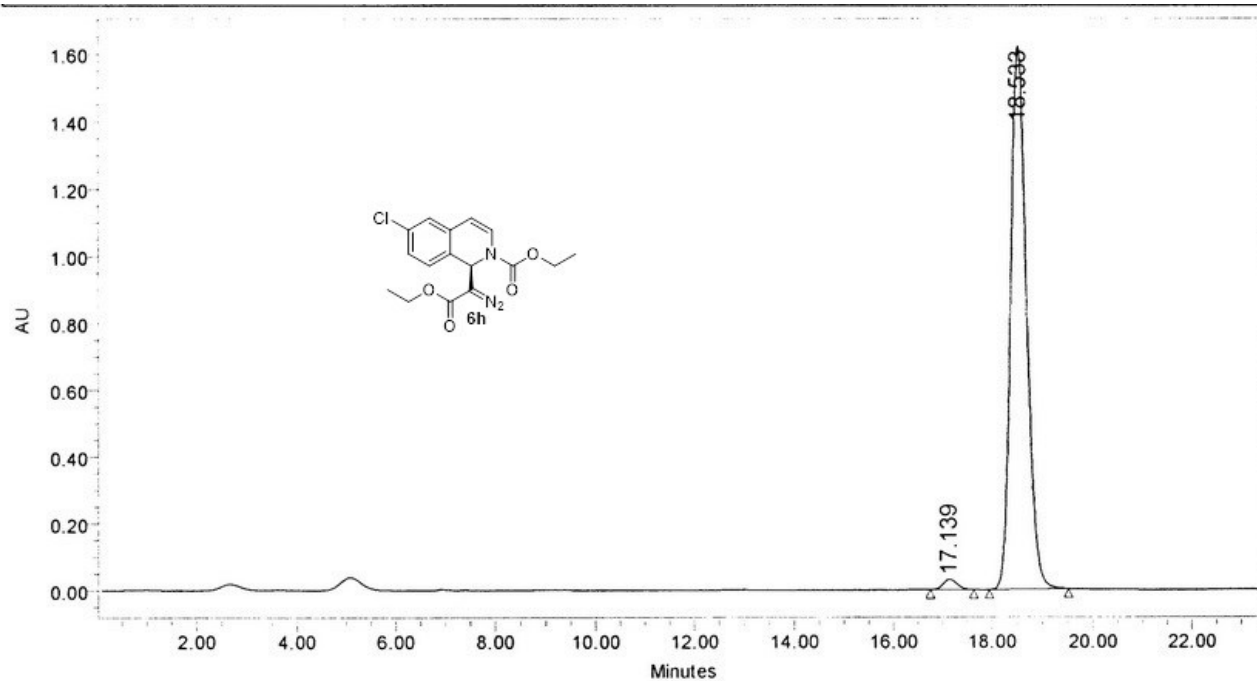

|   | RT<br>(min) | Area<br>( $\mu\text{V}\cdot\text{sec}$ ) | % Area | Height<br>( $\mu\text{V}$ ) | % Height |
|---|-------------|------------------------------------------|--------|-----------------------------|----------|
| 1 | 17.139      | 607700                                   | 1.69   | 31077                       | 1.88     |
| 2 | 18.533      | 35306742                                 | 98.31  | 1622149                     | 98.12    |

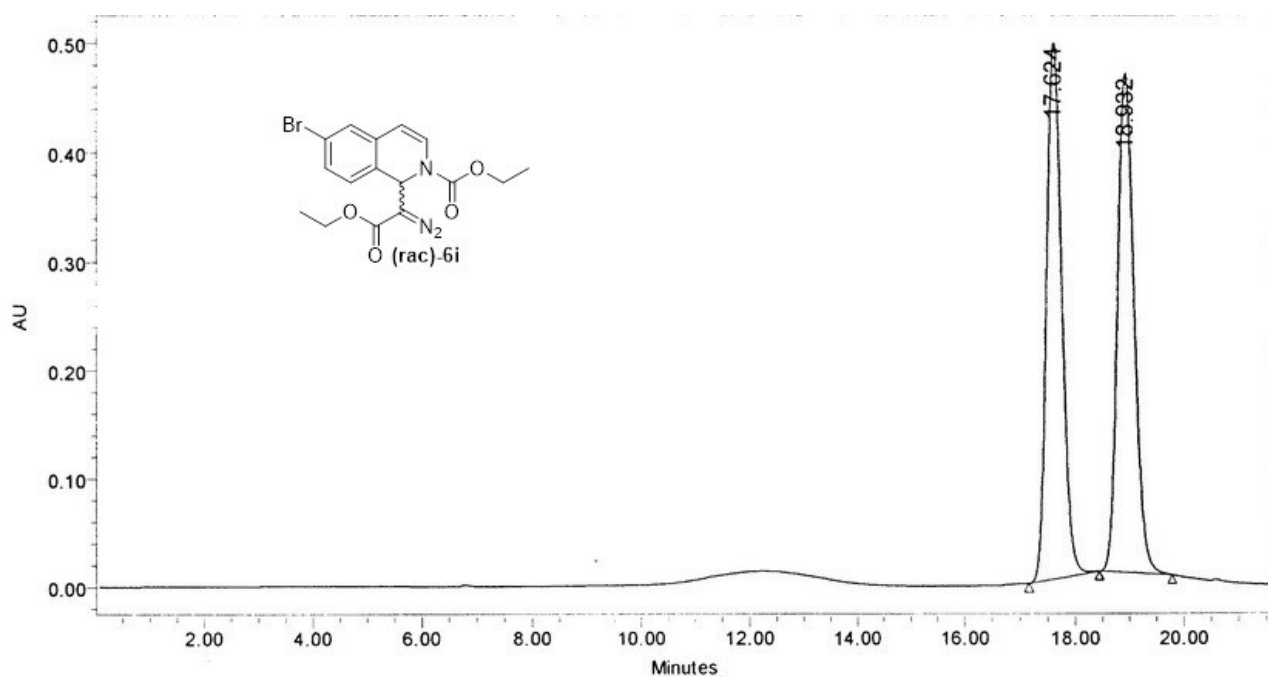

|   | RT (min) | Area (μV*sec) | % Area | Height (μV) | % Height |
|---|----------|---------------|--------|-------------|----------|
| 1 | 17.624   | 9384376       | 49.20  | 494071      | 51.83    |
| 2 | 18.932   | 9690075       | 50.80  | 459149      | 48.17    |

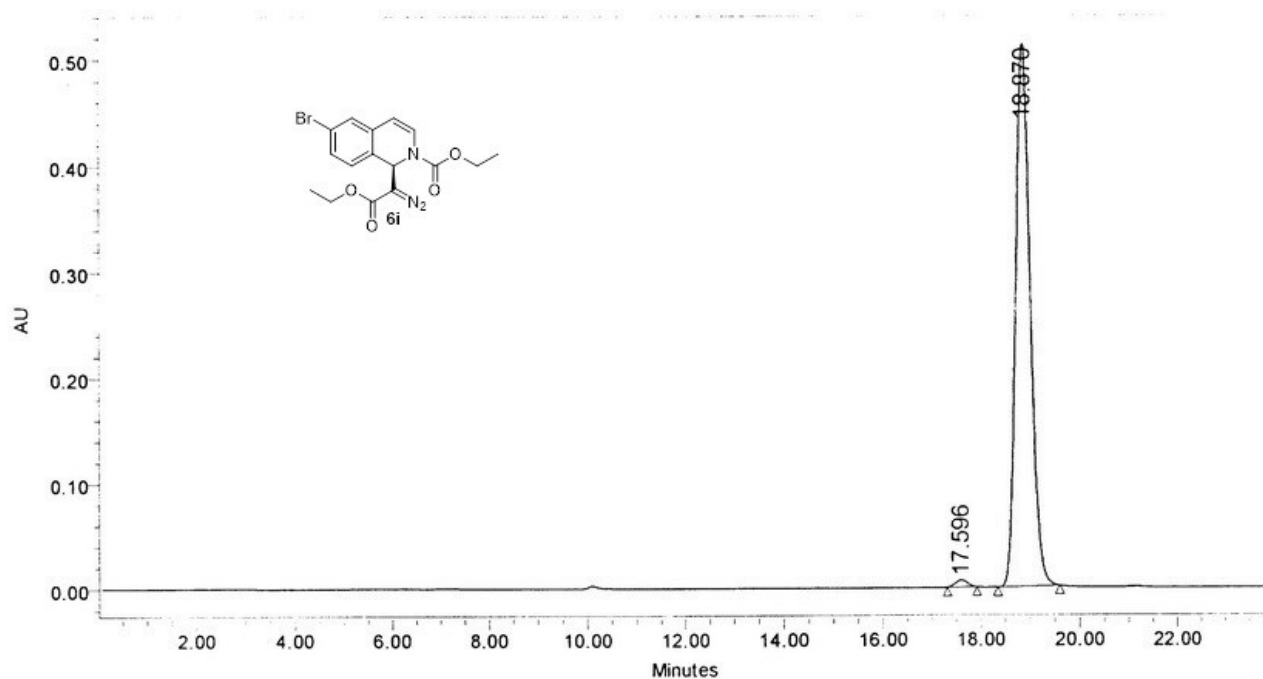

|   | RT (min) | Area (μV*sec) | % Area | Height (μV) | % Height |
|---|----------|---------------|--------|-------------|----------|
| 1 | 17.596   | 113604        | 1.07   | 6613        | 1.27     |
| 2 | 18.870   | 10517923      | 98.93  | 513970      | 98.73    |

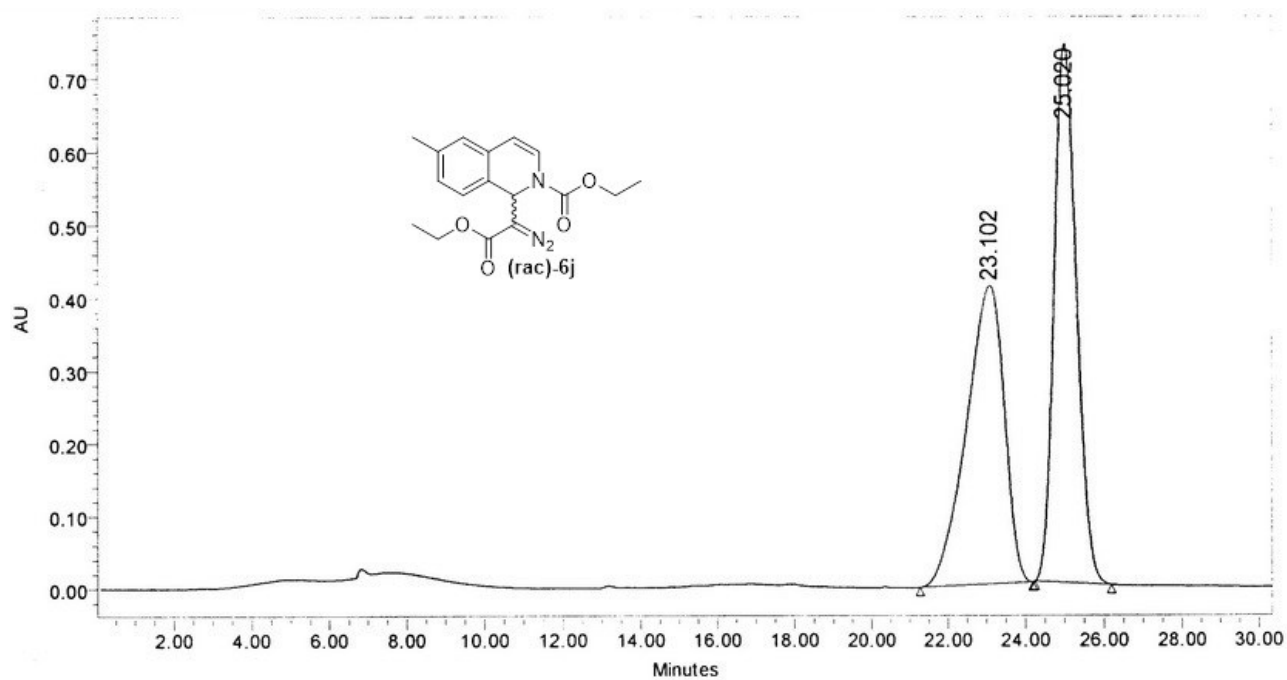

|   | RT<br>(min) | Area<br>( $\mu\text{V}\cdot\text{sec}$ ) | % Area | Height<br>( $\mu\text{V}$ ) | % Height |
|---|-------------|------------------------------------------|--------|-----------------------------|----------|
| 1 | 23.102      | 27965601                                 | 49.30  | 410479                      | 35.72    |
| 2 | 25.020      | 28758419                                 | 50.70  | 738653                      | 64.28    |

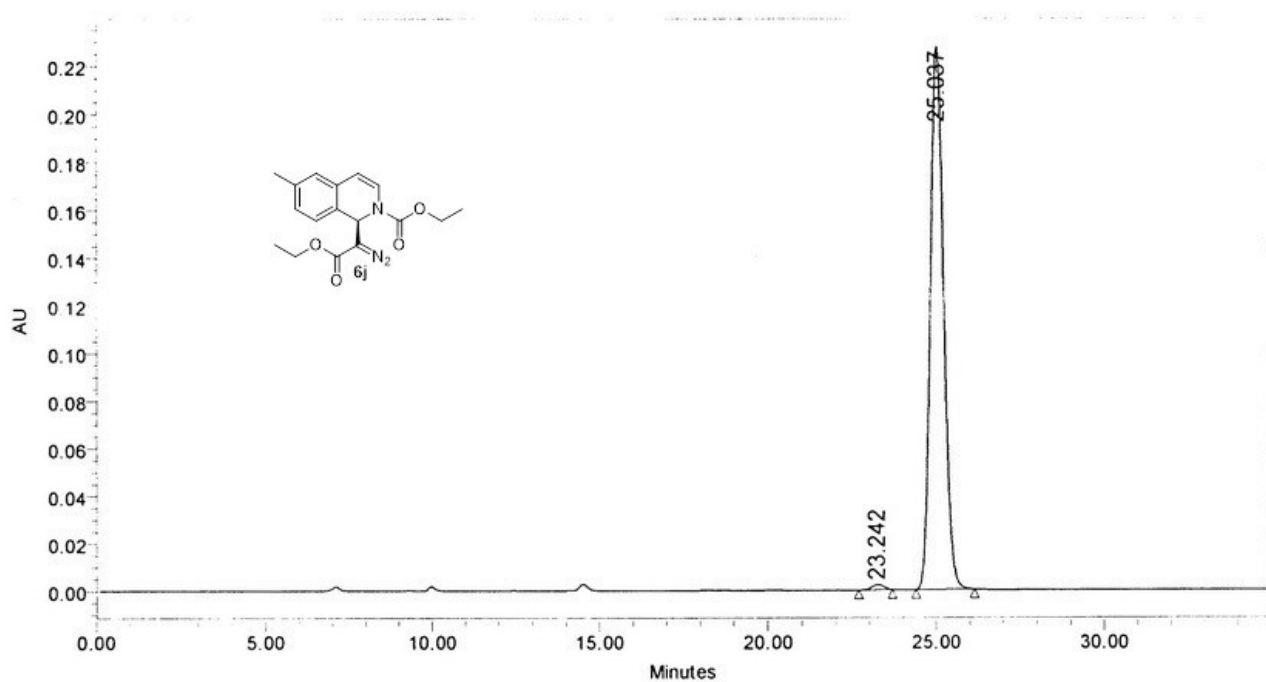

|   | RT<br>(min) | Area<br>( $\mu\text{V}\cdot\text{sec}$ ) | % Area | Height<br>( $\mu\text{V}$ ) | % Height |
|---|-------------|------------------------------------------|--------|-----------------------------|----------|
| 1 | 23.242      | 56462                                    | 0.89   | 2205                        | 0.96     |
| 2 | 25.037      | 6274140                                  | 99.11  | 227884                      | 99.04    |

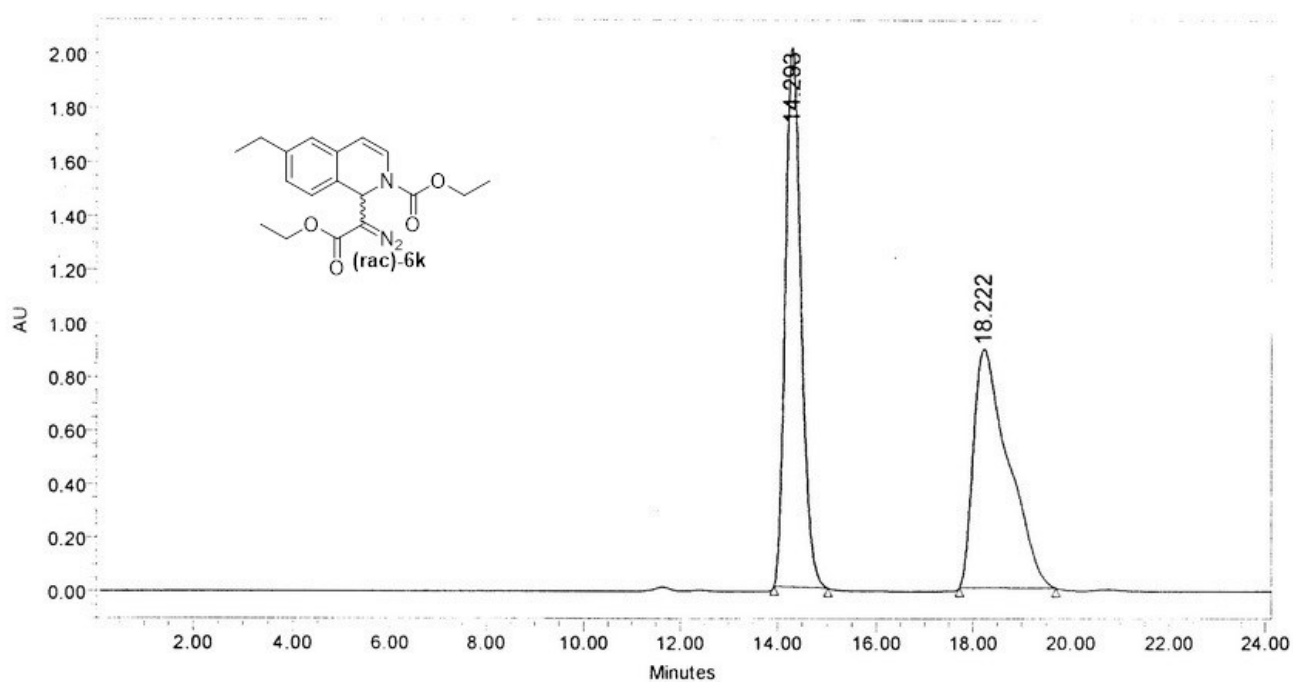

|   | RT<br>(min) | Area<br>( $\mu\text{V}\cdot\text{sec}$ ) | % Area | Height<br>( $\mu\text{V}$ ) | % Height |
|---|-------------|------------------------------------------|--------|-----------------------------|----------|
| 1 | 14.293      | 44475449                                 | 50.07  | 2010122                     | 69.29    |
| 2 | 18.222      | 44355248                                 | 49.93  | 890967                      | 30.71    |

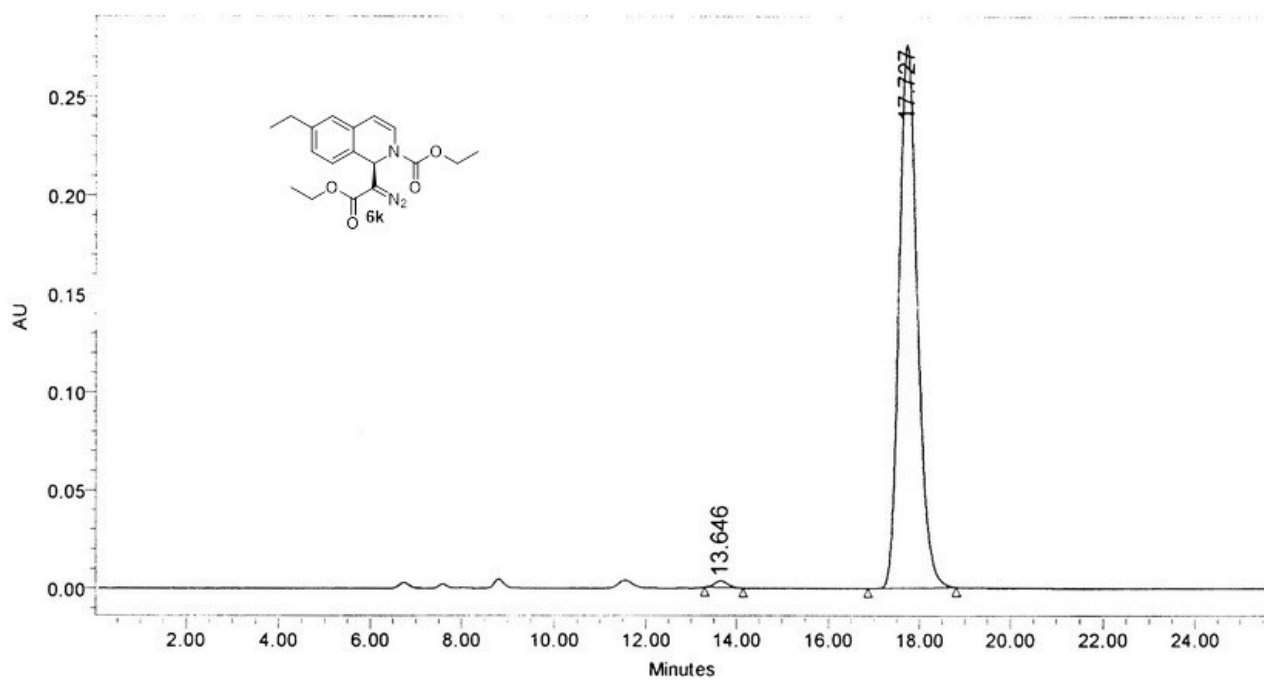

|   | RT<br>(min) | Area<br>( $\mu\text{V}\cdot\text{sec}$ ) | % Area | Height<br>( $\mu\text{V}$ ) | % Height |
|---|-------------|------------------------------------------|--------|-----------------------------|----------|
| 1 | 13.646      | 66298                                    | 0.85   | 3312                        | 1.18     |
| 2 | 17.727      | 7727879                                  | 99.15  | 276517                      | 98.82    |



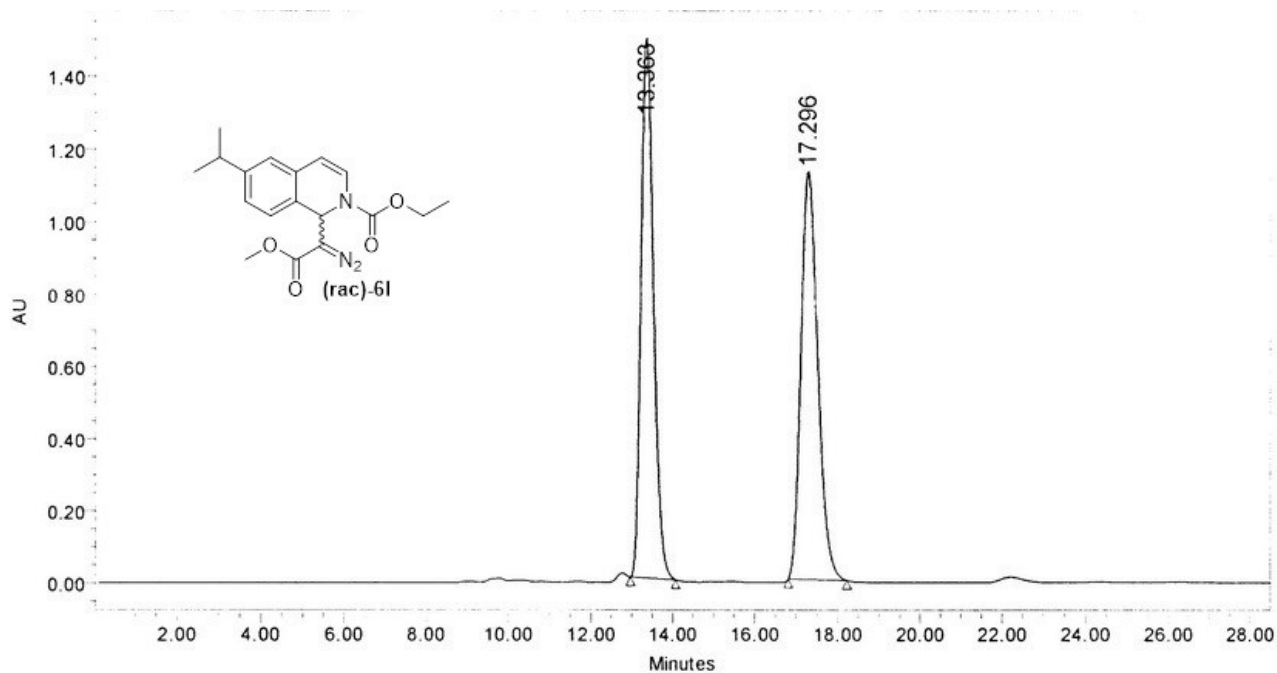

|   | RT<br>(min) | Area<br>( $\mu\text{V}\cdot\text{sec}$ ) | % Area | Height<br>( $\mu\text{V}$ ) | % Height |
|---|-------------|------------------------------------------|--------|-----------------------------|----------|
| 1 | 13.363      | 31382016                                 | 49.87  | 1492045                     | 56.89    |
| 2 | 17.296      | 31551354                                 | 50.13  | 1130418                     | 43.11    |

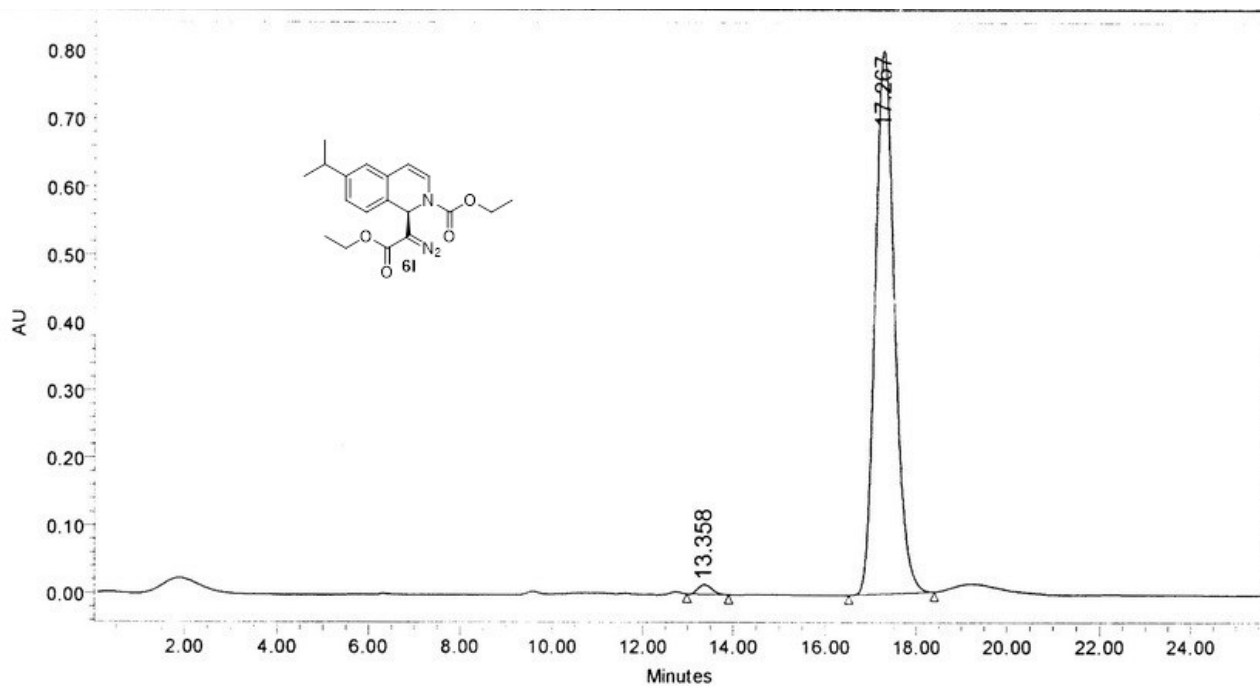

|   | RT<br>(min) | Area<br>( $\mu\text{V}\cdot\text{sec}$ ) | % Area | Height<br>( $\mu\text{V}$ ) | % Height |
|---|-------------|------------------------------------------|--------|-----------------------------|----------|
| 1 | 13.358      | 310268                                   | 1.28   | 14643                       | 1.79     |
| 2 | 17.267      | 23877777                                 | 98.72  | 801696                      | 98.21    |

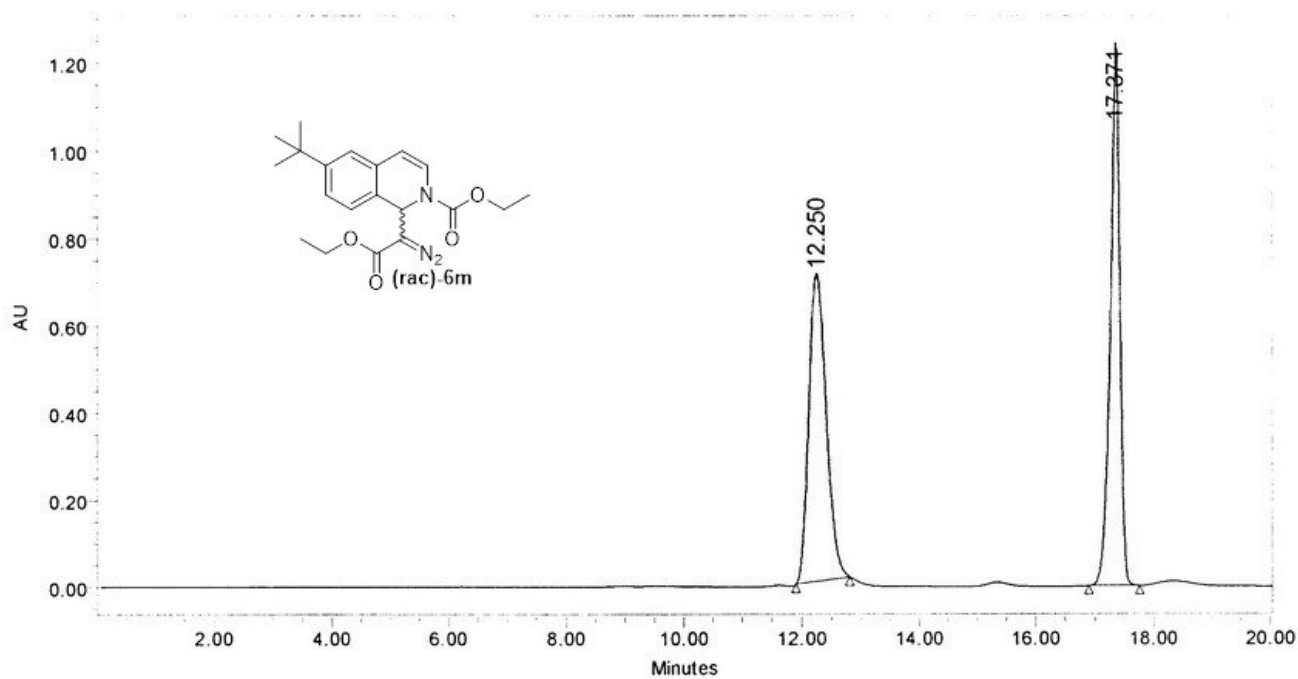

|   | RT<br>(min) | Area<br>( $\mu\text{V}\cdot\text{sec}$ ) | % Area | Height<br>( $\mu\text{V}$ ) | % Height |
|---|-------------|------------------------------------------|--------|-----------------------------|----------|
| 1 | 12.250      | 14317564                                 | 50.36  | 707179                      | 36.28    |
| 2 | 17.371      | 14110141                                 | 49.64  | 1242188                     | 63.72    |

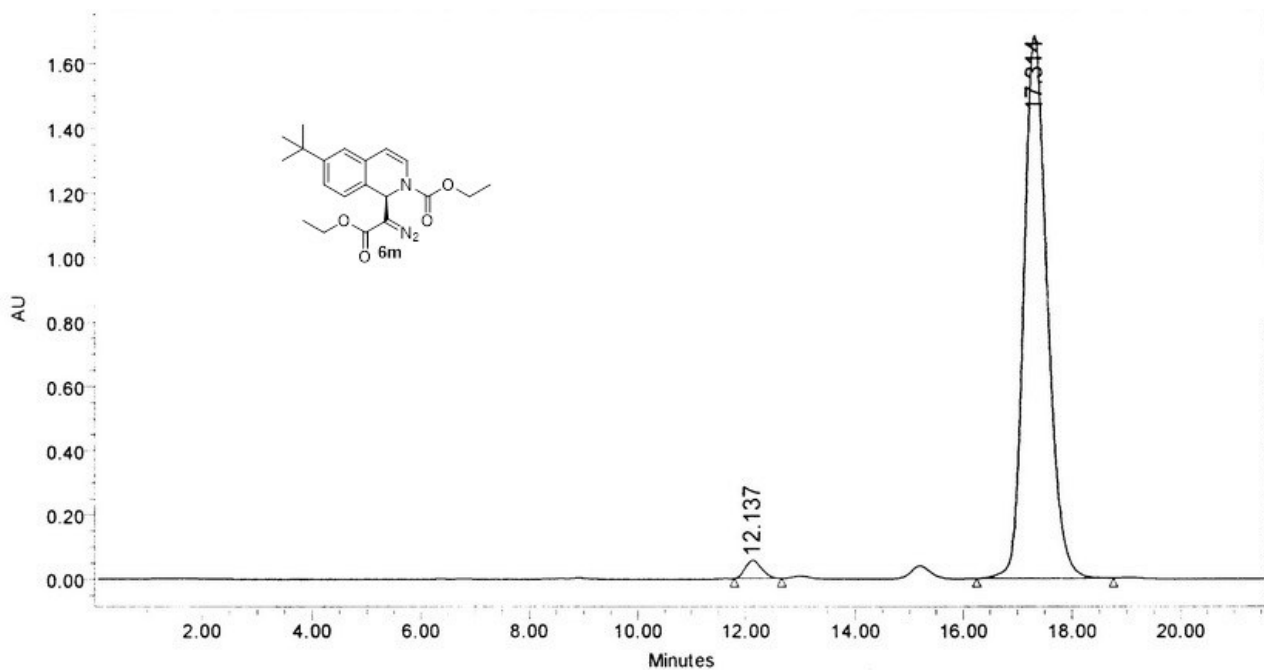

|   | RT<br>(min) | Area<br>( $\mu\text{V}\cdot\text{sec}$ ) | % Area | Height<br>( $\mu\text{V}$ ) | % Height |
|---|-------------|------------------------------------------|--------|-----------------------------|----------|
| 1 | 12.137      | 1150303                                  | 2.24   | 55697                       | 3.20     |
| 2 | 17.314      | 50094114                                 | 97.76  | 1686883                     | 96.80    |

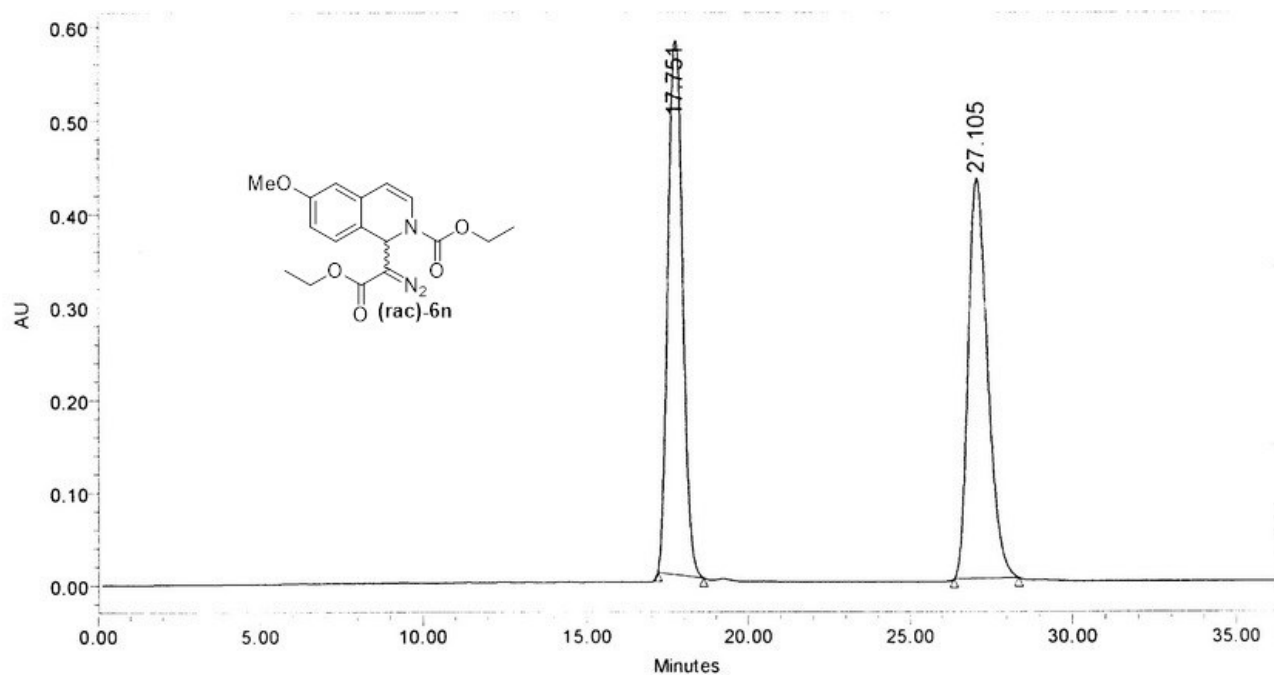

|   | RT<br>(min) | Area<br>(μV*sec) | % Area | Height<br>(μV) | %<br>Height |
|---|-------------|------------------|--------|----------------|-------------|
| 1 | 17.751      | 18442260         | 50.51  | 574738         | 57.12       |
| 2 | 27.105      | 18073143         | 49.49  | 431443         | 42.88       |

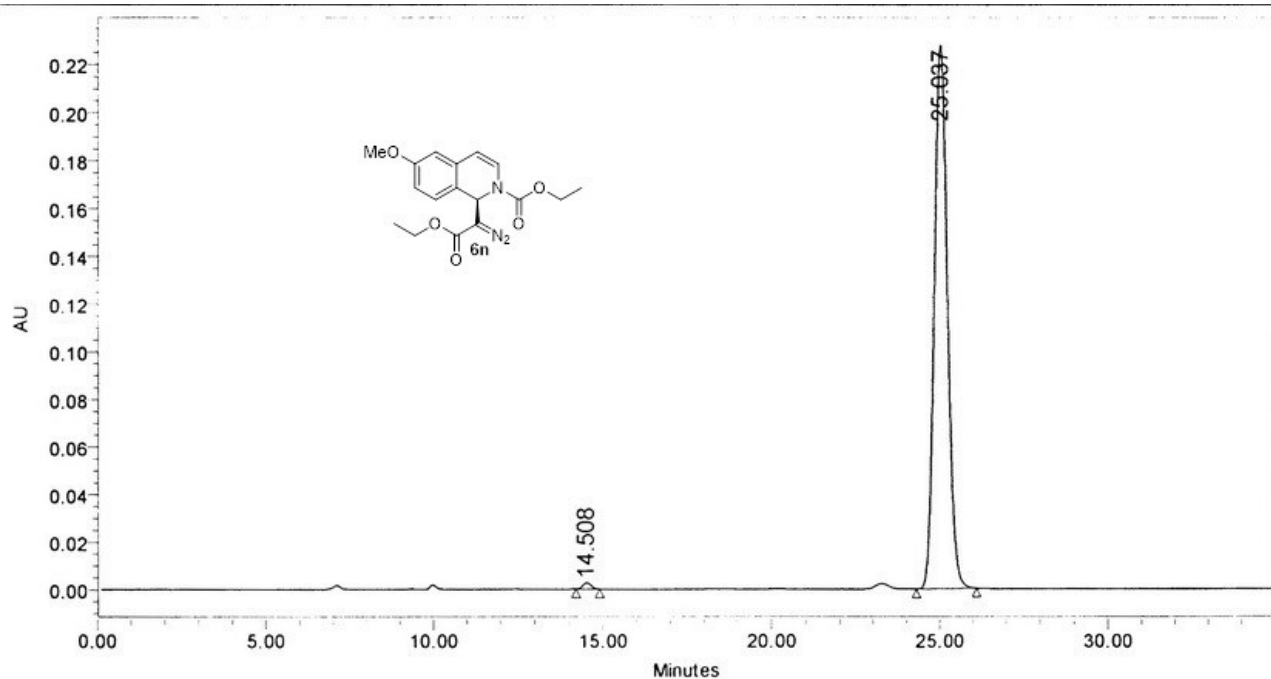

|   | RT<br>(min) | Area<br>(μV*sec) | % Area | Height<br>(μV) | %<br>Height |
|---|-------------|------------------|--------|----------------|-------------|
| 1 | 14.508      | 45554            | 0.72   | 2681           | 1.16        |
| 2 | 25.037      | 6280013          | 99.28  | 227961         | 98.84       |

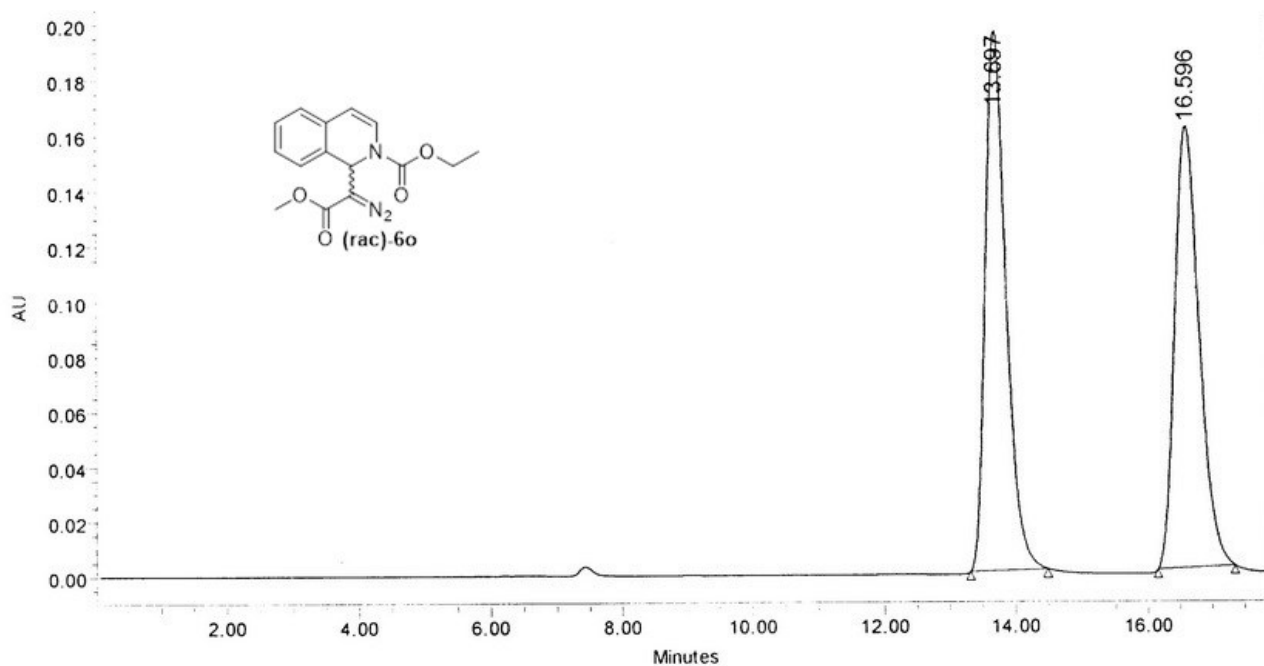

|   | RT<br>(min) | Area<br>(μV*sec) | % Area | Height<br>(μV) | %<br>Height |
|---|-------------|------------------|--------|----------------|-------------|
| 1 | 13.697      | 4271697          | 50.19  | 195902         | 55.00       |
| 2 | 16.596      | 4240163          | 49.81  | 160305         | 45.00       |

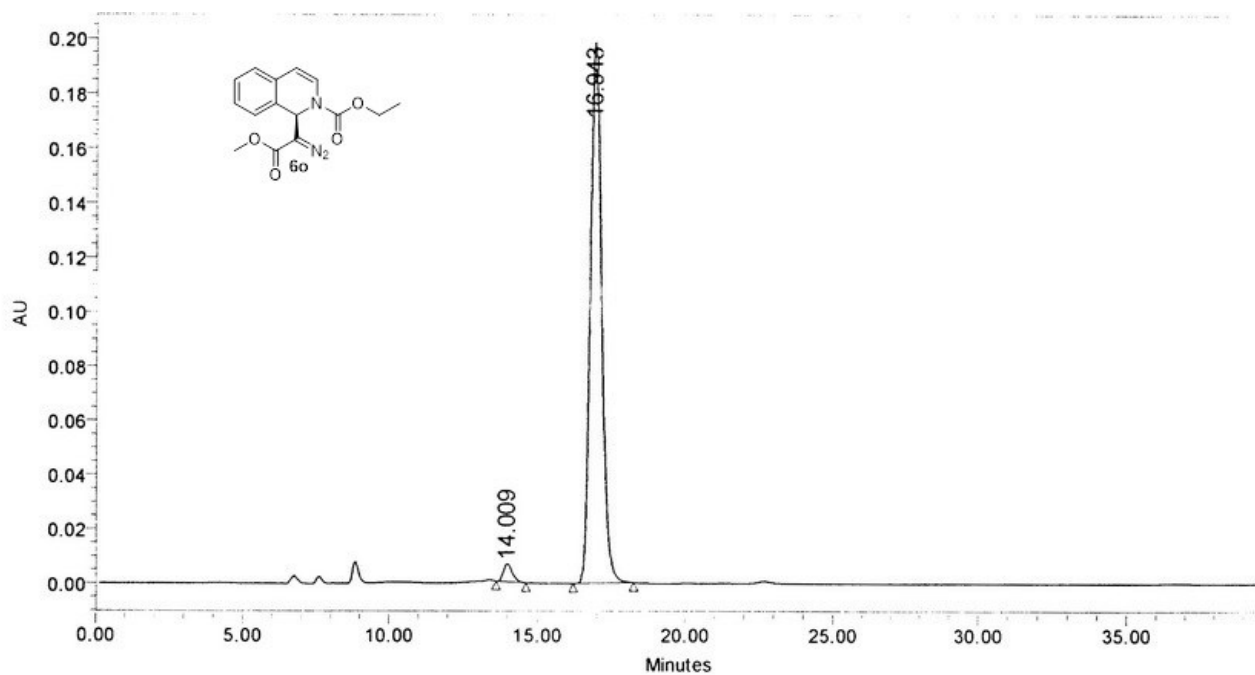

|   | RT<br>(min) | Area<br>(μV*sec) | % Area | Height<br>(μV) | %<br>Height |
|---|-------------|------------------|--------|----------------|-------------|
| 1 | 14.009      | 135296           | 2.54   | 6587           | 3.21        |
| 2 | 16.943      | 5200033          | 97.46  | 198926         | 96.79       |

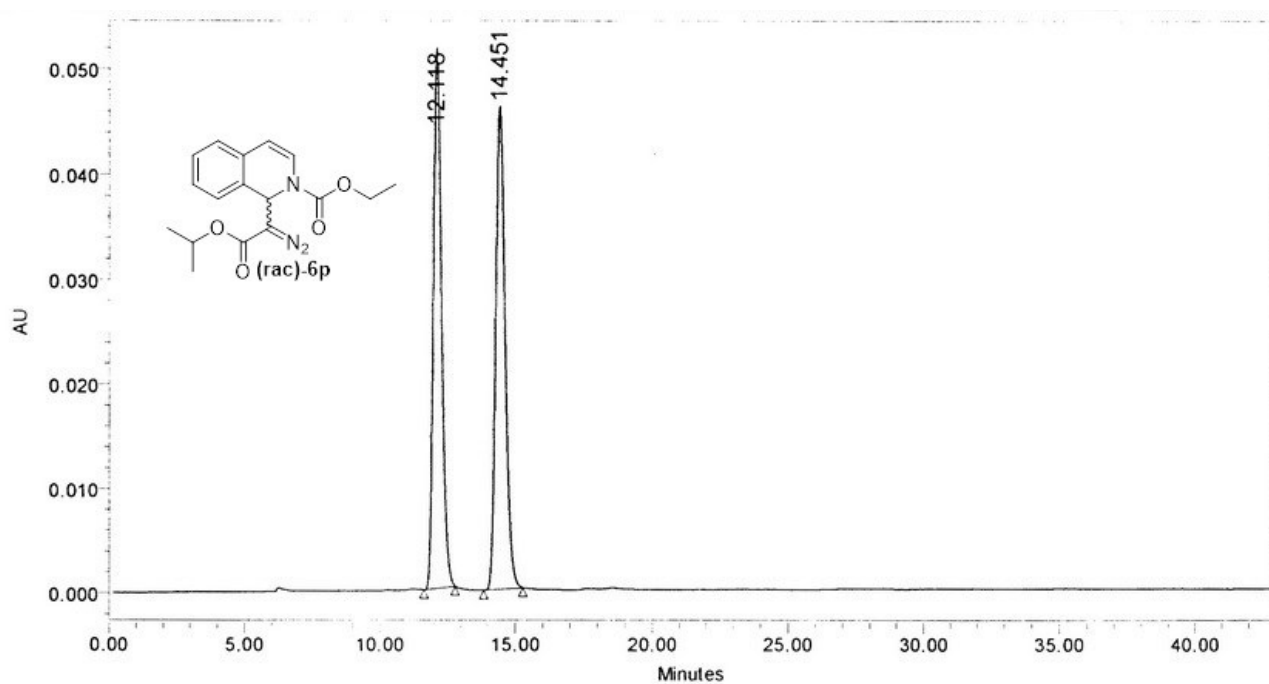

|   | RT<br>(min) | Area<br>( $\mu\text{V}\cdot\text{sec}$ ) | % Area | Height<br>( $\mu\text{V}$ ) | % Height |
|---|-------------|------------------------------------------|--------|-----------------------------|----------|
| 1 | 12.118      | 1088025                                  | 49.46  | 51554                       | 52.75    |
| 2 | 14.451      | 1111687                                  | 50.54  | 46177                       | 47.25    |

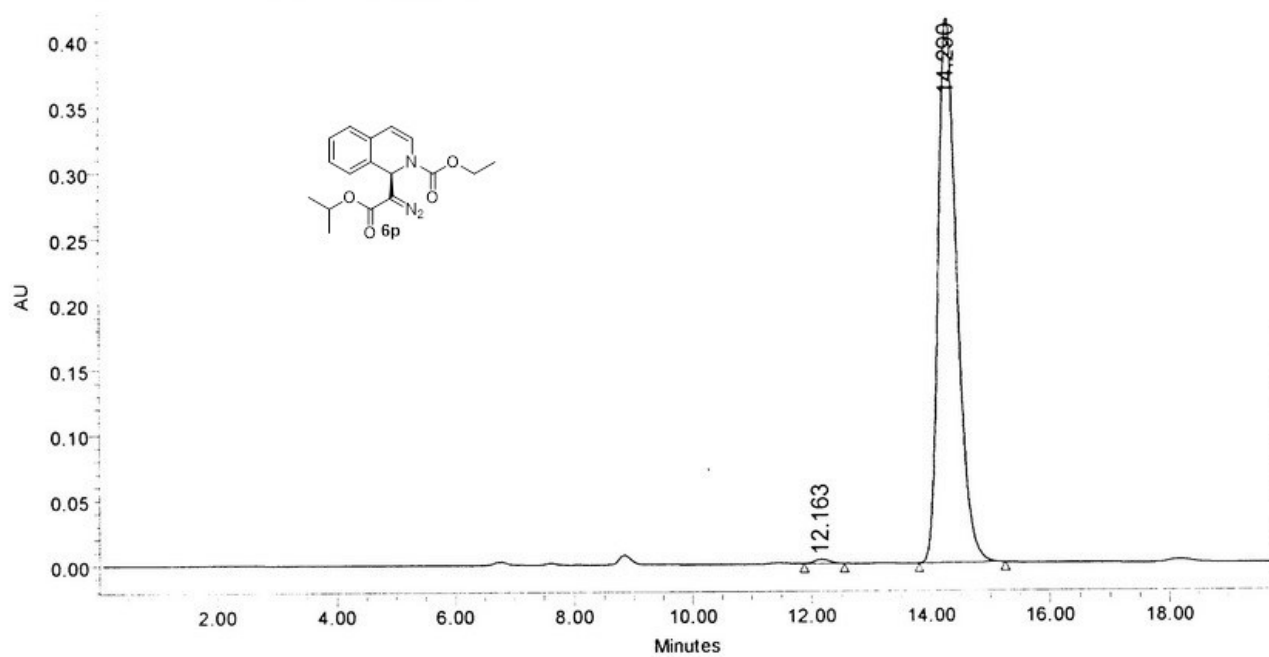

|   | RT<br>(min) | Area<br>( $\mu\text{V}\cdot\text{sec}$ ) | % Area | Height<br>( $\mu\text{V}$ ) | % Height |
|---|-------------|------------------------------------------|--------|-----------------------------|----------|
| 1 | 12.163      | 57432                                    | 0.63   | 3253                        | 0.78     |
| 2 | 14.290      | 9078872                                  | 99.37  | 415437                      | 99.22    |

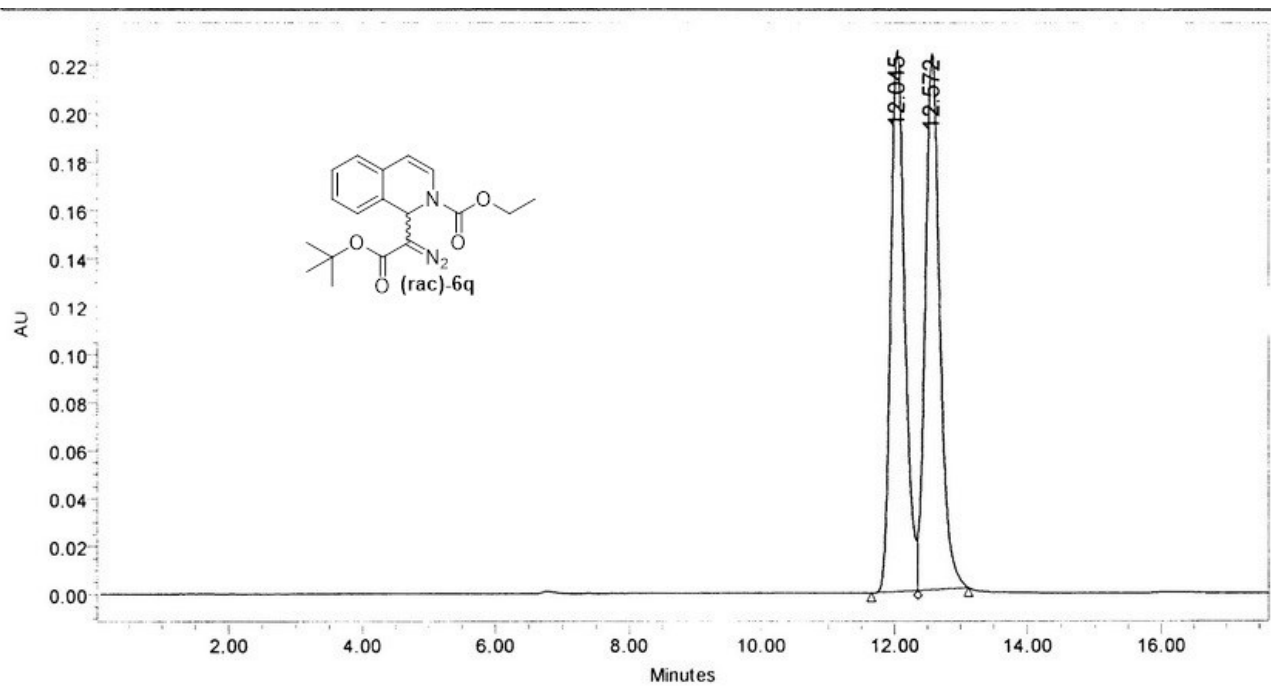

|   | RT<br>(min) | Area<br>( $\mu\text{V}\cdot\text{sec}$ ) | % Area | Height<br>( $\mu\text{V}$ ) | % Height |
|---|-------------|------------------------------------------|--------|-----------------------------|----------|
| 1 | 12.045      | 3338791                                  | 49.17  | 225506                      | 50.25    |
| 2 | 12.572      | 3450930                                  | 50.83  | 223302                      | 49.75    |

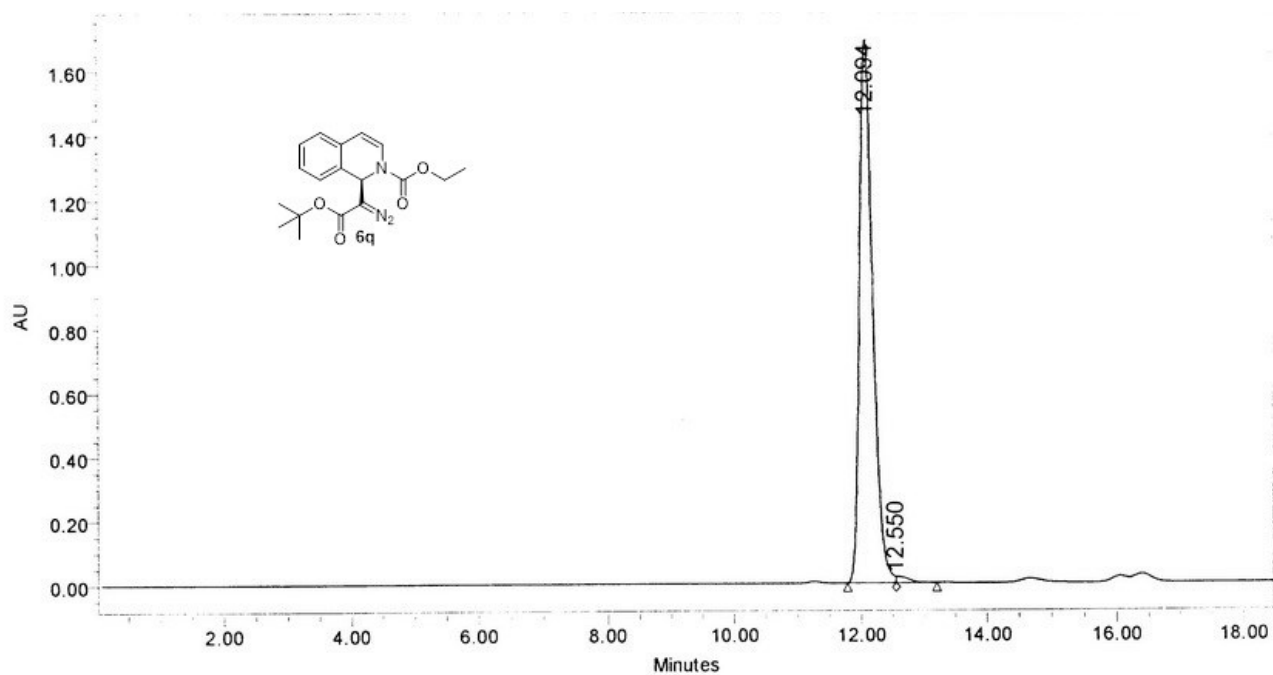

|   | RT<br>(min) | Area<br>( $\mu\text{V}\cdot\text{sec}$ ) | % Area | Height<br>( $\mu\text{V}$ ) | % Height |
|---|-------------|------------------------------------------|--------|-----------------------------|----------|
| 1 | 12.094      | 24603527                                 | 98.94  | 1693988                     | 98.90    |
| 2 | 12.550      | 262911                                   | 1.06   | 18839                       | 1.10     |

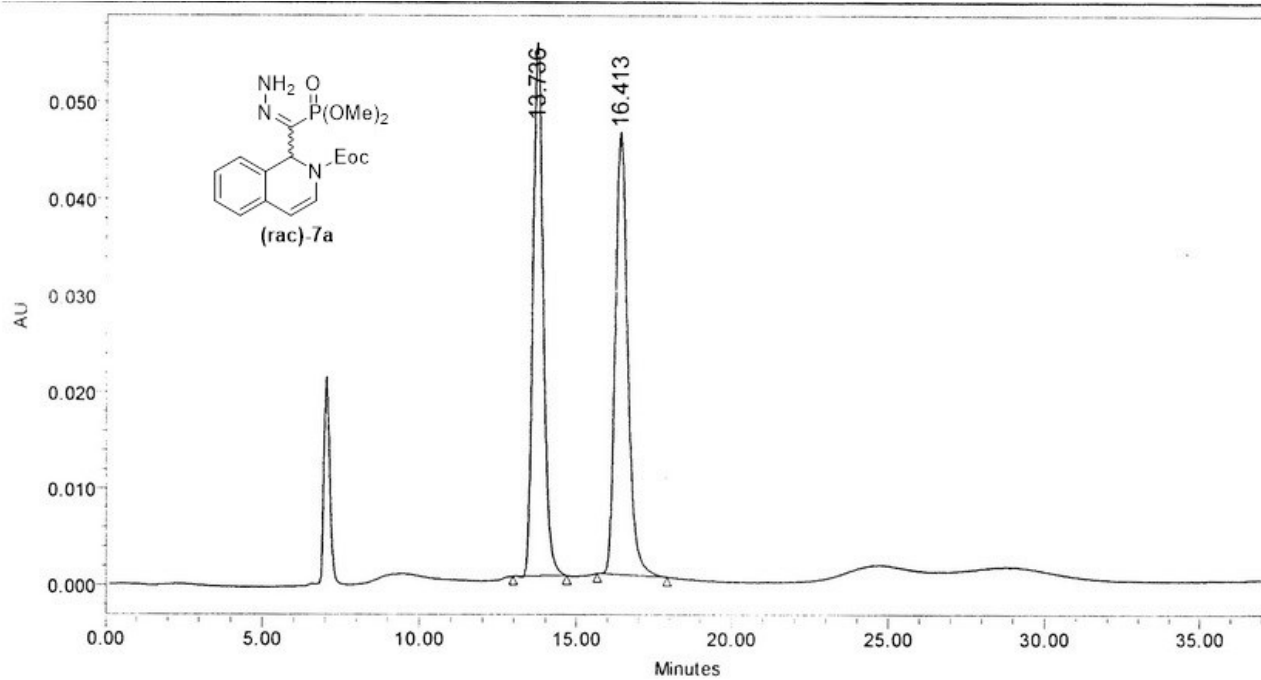

|   | RT<br>(min) | Area<br>( $\mu\text{V}\cdot\text{sec}$ ) | % Area | Height<br>( $\mu\text{V}$ ) | % Height |
|---|-------------|------------------------------------------|--------|-----------------------------|----------|
| 1 | 13.736      | 1244649                                  | 49.22  | 55109                       | 54.57    |
| 2 | 16.413      | 1284160                                  | 50.78  | 45871                       | 45.43    |

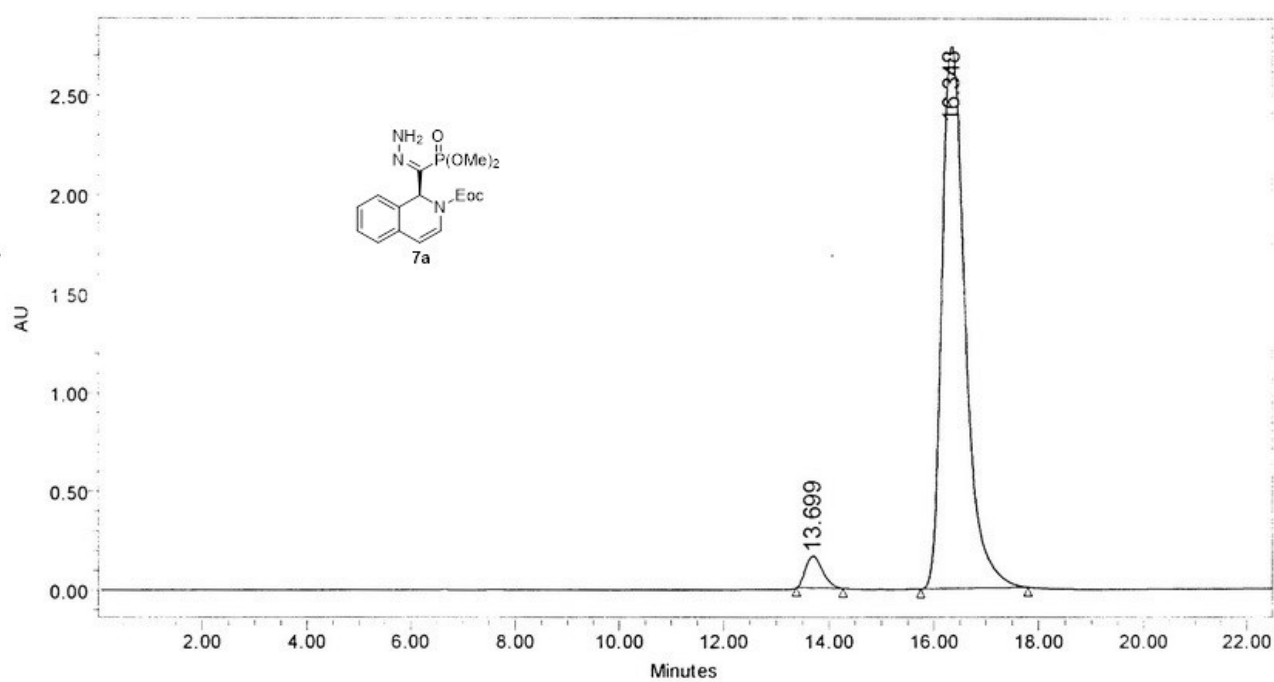

|   | RT<br>(min) | Area<br>( $\mu\text{V}\cdot\text{sec}$ ) | % Area | Height<br>( $\mu\text{V}$ ) | % Height |
|---|-------------|------------------------------------------|--------|-----------------------------|----------|
| 1 | 13.699      | 3571008                                  | 4.04   | 161269                      | 5.55     |
| 2 | 16.348      | 84732688                                 | 95.96  | 2741976                     | 94.45    |

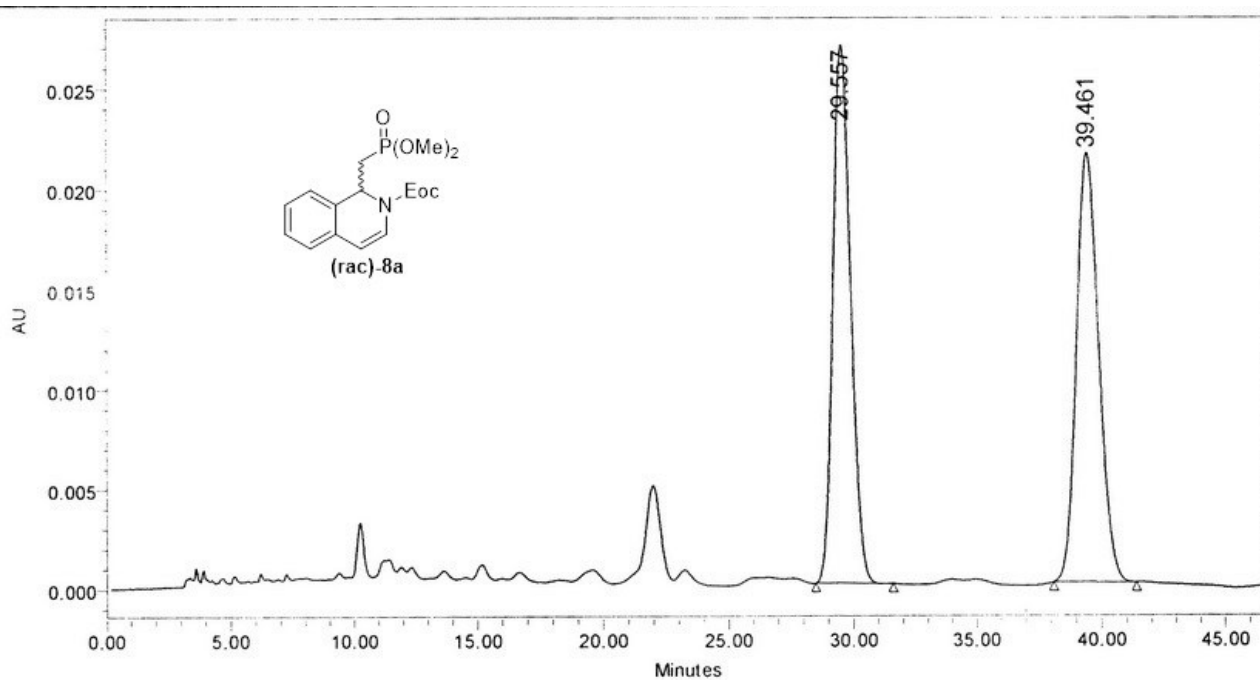

|   | RT<br>(min) | Area<br>(μV*sec) | % Area | Height<br>(μV) | %<br>Height |
|---|-------------|------------------|--------|----------------|-------------|
| 1 | 29.557      | 1318423          | 50.11  | 26887          | 55.59       |
| 2 | 39.461      | 1312839          | 49.89  | 21483          | 44.41       |

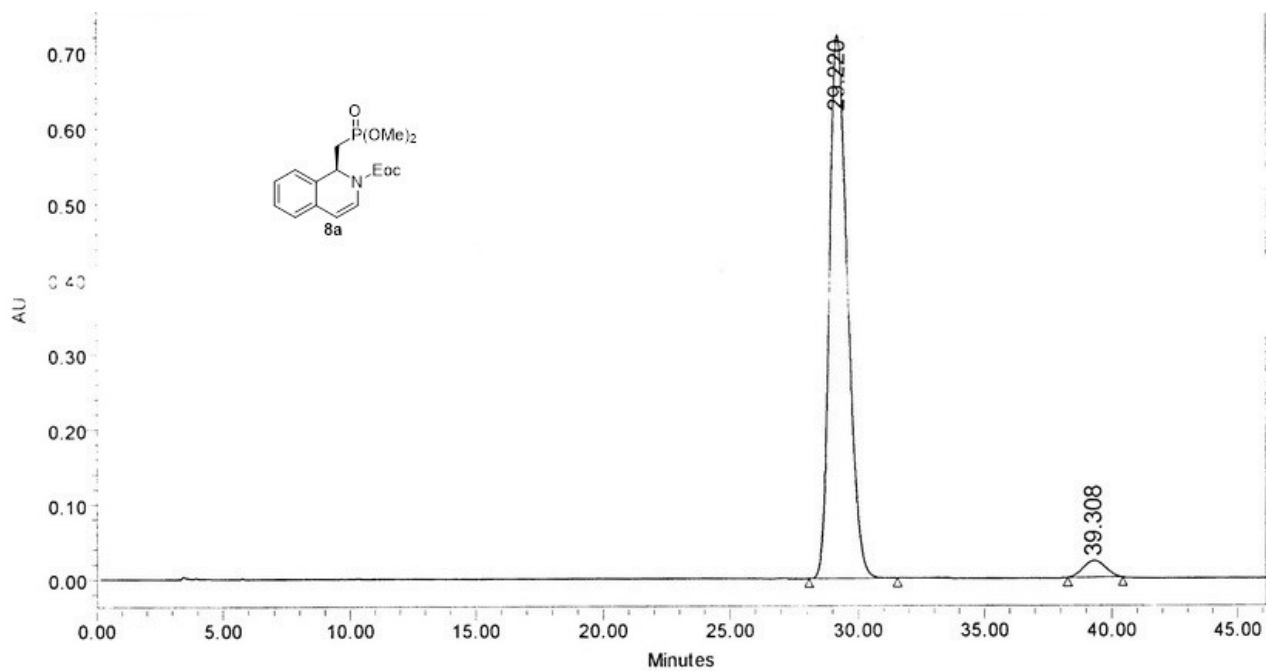

|   | RT<br>(min) | Area<br>(μV*sec) | % Area | Height<br>(μV) | %<br>Height |
|---|-------------|------------------|--------|----------------|-------------|
| 1 | 29.220      | 35266490         | 96.30  | 722292         | 97.01       |
| 2 | 39.308      | 1354715          | 3.70   | 22248          | 2.99        |



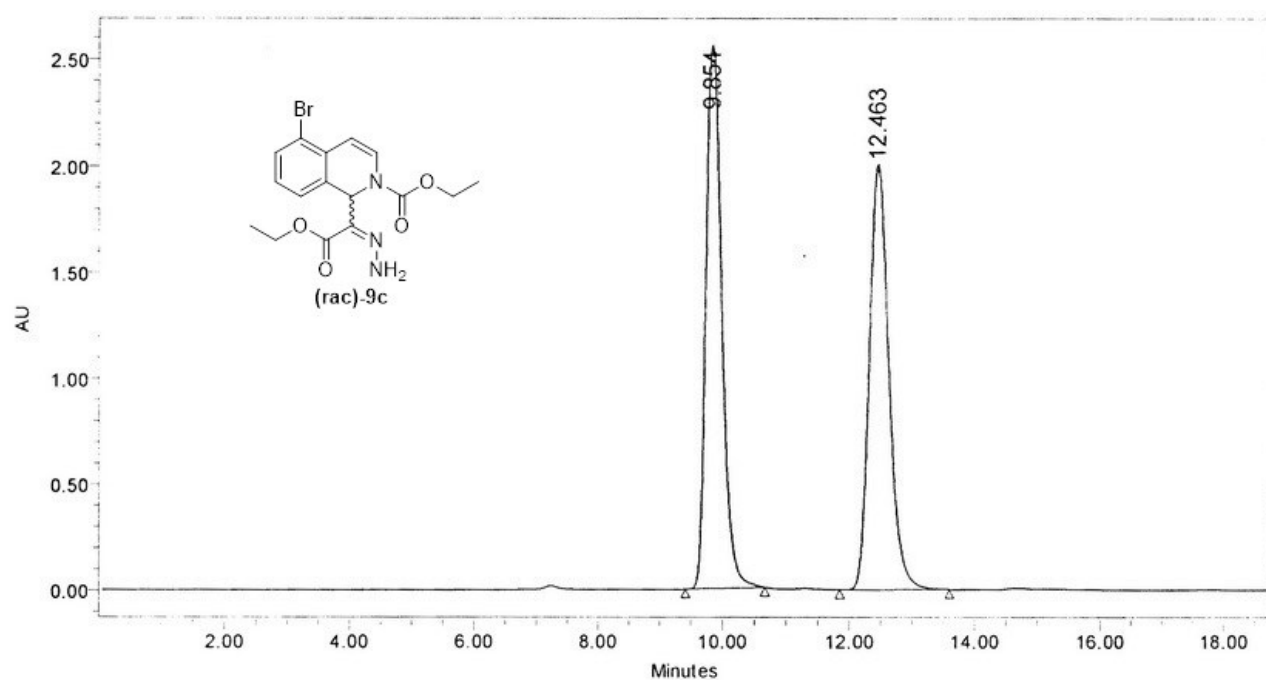

|   | RT<br>(min) | Area<br>( $\mu\text{V}\cdot\text{sec}$ ) | % Area | Height<br>( $\mu\text{V}$ ) | % Height |
|---|-------------|------------------------------------------|--------|-----------------------------|----------|
| 1 | 9.854       | 44790690                                 | 50.83  | 2556705                     | 56.01    |
| 2 | 12.463      | 43323513                                 | 49.17  | 2008355                     | 43.99    |

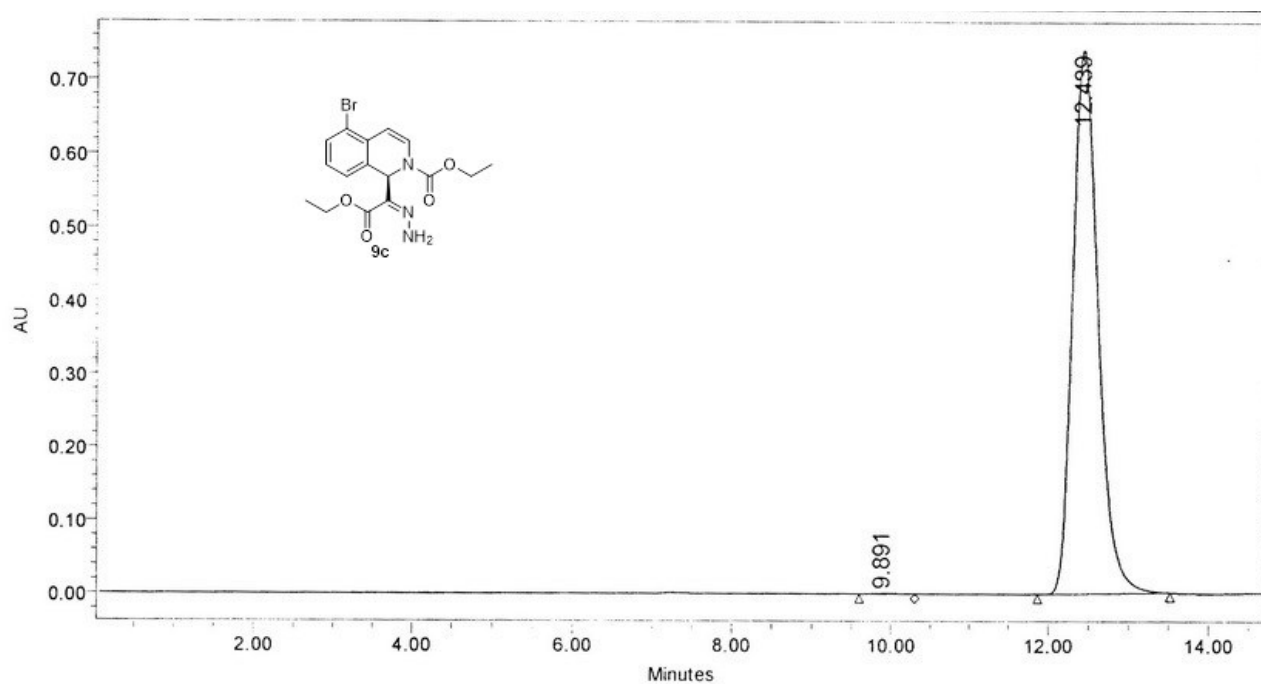

|   | RT<br>(min) | Area<br>( $\mu\text{V}\cdot\text{sec}$ ) | % Area | Height<br>( $\mu\text{V}$ ) | % Height |
|---|-------------|------------------------------------------|--------|-----------------------------|----------|
| 1 | 9.891       | 14372                                    | 0.09   | 855                         | 0.12     |
| 2 | 12.439      | 16195637                                 | 99.91  | 742200                      | 99.88    |
